# Supplementary material for: Coexistence of Microbial Species in Structured Communities by Forming a Hawk-Dove Game Like Interactive Relationship
Source: Front Microbiol. 2019 Apr 16;10:807. doi: 10.3389/fmicb.2019.00807 (PMC6477097; doi:10.3389/fmicb.2019.00807)
Supplement: Supplementary file 2 [file Table_2.XLSX]

## Sheet: PAKPs_KPvsKPs.DEG_up
Supplementary Dataset 2. Significantly differentially expressed genes of K. pneumoniae when statically cocultured with P. aeruginosa on LB agar for 3 days compared to 1 day.
Gene_id	readcount_PAKPs_KP	readcount_KPs	log2.Fold_change.	pvalue	qvalue	Gene_name	Gene_description
AVR78_RS00010	243.087	16.0407	3.9217	2.4221e-128	7.6129e-128	AVR78_RS00010	sugar ABC transporter ATP-binding protein
AVR78_RS00015	43.4084	4.53325	3.2594	5.8627e-24	1.467e-24	AVR78_RS00015	ABC transporter permease
AVR78_RS00020	102.444	14.6459	2.8063	1.3459e-52	9.0433e-53	AVR78_RS00020	sugar ABC transporter
AVR78_RS00025	112.862	10.4613	3.4314	5.2375e-60	4.5009e-60	AVR78_RS00025	hypothetical protein
AVR78_RS00040	60.7717	17.7843	1.7728	1.3286e-27	3.7915e-28	AVR78_RS00040	histidine-type phosphatase
AVR78_RS00045	65.9807	21.6201	1.6097	8.7361e-29	2.6049e-29	AVR78_RS00045	MFS transporter
AVR78_RS00050	90.2894	6.62552	3.7685	8.9792e-49	5.2292e-49	AVR78_RS00050	inositol monophosphatase
AVR78_RS00060	62.5081	5.23067	3.579	3.5823e-34	1.3006e-34	AVR78_RS00060	metal-dependent hydrolase
AVR78_RS00065	76.3987	2.78969	4.7754	6.0027e-41	2.7113e-41	AVR78_RS00065	PucR family transcriptional regulator
AVR78_RS00070	34.7267	9.41521	1.883	8.4237e-17	1.5954e-17	AVR78_RS00070	cytosine permease
AVR78_RS00080	90.2894	23.7124	1.9289	1.9164e-41	8.8473e-42	AVR78_RS00080	carbohydrate kinase
AVR78_RS00085	109.389	26.1534	2.0644	4.7142e-51	2.9594e-51	AVR78_RS00085	D-isomer specific 2-hydroxyacid dehydrogenase
AVR78_RS00090	81.6077	9.41521	3.1156	3.1726e-43	1.5672e-43	AVR78_RS00090	sugar kinase
AVR78_RS00095	29.5177	1.39485	4.4034	5.3229e-17	1.0212e-17	AVR78_RS00095	ABC transporter permease
AVR78_RS00100	48.6174	1.39485	5.1233	3.0028e-26	8.1927e-27	AVR78_RS00100	ABC transporter permease
AVR78_RS00105	88.5531	12.9023	2.7789	1.3486e-45	7.1796e-46	AVR78_RS00105	sugar ABC transporter ATP-binding protein
AVR78_RS00115	283.023	81.5985	1.7943	1.233e-122	3.6505e-122	AVR78_RS00115	biotin sulfoxide reductase
AVR78_RS00135	38.1994	12.2049	1.6461	1.7742e-17	3.4601e-18	AVR78_RS00135	chromosome partitioning protein ParB
AVR78_RS00290	237.878	104.962	1.1804	6.0387e-88	1.0418e-87	AVR78_RS00290	filamentous hemagglutinin
AVR78_RS00295	90.2894	16.7381	2.4314	9.0251e-45	4.6483e-45	AVR78_RS00295	ShlB/FhaC/HecB family hemolysin secretion/activation protein
AVR78_RS00355	3.47267	0	3.3159	0.00425	0.00044236	AVR78_RS00355	tRNA-Gln
AVR78_RS00360	3.47267	0	3.3159	0.00425	0.00044236	AVR78_RS00360	tRNA-Gln
AVR78_RS00390	36.463	3.83583	3.2488	2.2672e-20	4.9309e-21	AVR78_RS00390	hypothetical protein
AVR78_RS00415	621.608	206.786	1.5879	1.326e-254	1.0314e-253	AVR78_RS00415	glucosamine-6-phosphate deaminase
AVR78_RS00420	3.47267	1.04613	1.731	0.0095846	0.00097938	AVR78_RS00420	hypothetical protein
AVR78_RS00445	109.389	38.3583	1.5119	1.682e-45	8.8924e-46	chiP	chitoporin
AVR78_RS00455	34.7267	3.1384	3.4679	1.2012e-19	2.5472e-20	AVR78_RS00455	MFS transporter
AVR78_RS00460	31.254	8.02036	1.9623	1.7321e-15	3.1013e-16	tcuB	tricarballylate utilization protein TcuB
AVR78_RS00465	125.016	25.1072	2.3159	2.2397e-60	1.9429e-60	AVR78_RS00465	FAD-binding dehydrogenase
AVR78_RS00520	201.415	78.8088	1.3537	8.4459e-79	1.157e-78	AVR78_RS00520	two-component system sensor histidine kinase KdbD
AVR78_RS00530	144.116	15.3433	3.2315	1.9193e-75	2.4741e-75	AVR78_RS00530	potassium-transporting ATPase subunit B
AVR78_RS00535	74.6624	16.3894	2.1876	4.2538e-36	1.6515e-36	AVR78_RS00535	potassium-transporting ATPase subunit KdpA
AVR78_RS00605	29.5177	2.44098	3.596	5.4034e-17	1.0349e-17	AVR78_RS00605	hypothetical protein
AVR78_RS00735	5.209	0	3.9009	0.00041908	4.6141e-05	AVR78_RS00735	tRNA-Lys
AVR78_RS00895	81.6077	25.8046	1.6611	1.2746e-35	4.8744e-36	AVR78_RS00895	hypothetical protein
AVR78_RS00900	175.37	84.7369	1.0493	1.6504e-62	1.5117e-62	AVR78_RS00900	AcrB/AcrD/AcrF family protein
AVR78_RS00915	368.103	155.177	1.2462	6.7517e-138	2.4397e-137	AVR78_RS00915	ATPase P
AVR78_RS00960	152.797	50.5632	1.5955	3.6933e-64	3.6061e-64	AVR78_RS00960	adenosylmethionine--8-amino-7-oxononanoate transaminase
AVR78_RS00965	142.379	49.8657	1.5136	1.0368e-58	8.5577e-59	AVR78_RS00965	biotin synthase
AVR78_RS00970	76.3987	18.4817	2.0475	4.431e-36	1.7188e-36	AVR78_RS00970	8-amino-7-oxononanoate synthase
AVR78_RS00975	13.8907	4.88196	1.5086	4.5916e-07	5.8498e-08	AVR78_RS00975	malonyl-[acyl-carrier protein] O-methyltransferase BioC
AVR78_RS00980	52.09	14.2972	1.8653	2.4864e-24	6.3143e-25	AVR78_RS00980	ATP-dependent dethiobiotin synthetase BioD
AVR78_RS01060	102.444	48.8196	1.0693	1.6629e-37	6.7472e-38	AVR78_RS01060	lysylphosphatidylglycerol synthetase family protein
AVR78_RS01080	74.6624	21.2714	1.8115	8.5276e-34	3.0501e-34	AVR78_RS01080	ABC transporter permease
AVR78_RS01085	104.18	30.3379	1.7799	3.5822e-46	1.9408e-46	AVR78_RS01085	ABC transporter permease
AVR78_RS01105	62.5081	30.6866	1.0264	3.4047e-23	8.1631e-24	AVR78_RS01105	LysR family transcriptional regulator
AVR78_RS01115	112.862	24.0611	2.2298	5.1718e-54	3.6569e-54	AVR78_RS01115	MFS transporter
AVR78_RS01125	81.6077	16.0407	2.347	3.3916e-40	1.4995e-40	AVR78_RS01125	transketolase
AVR78_RS01130	72.9261	25.8046	1.4988	8.3478e-31	2.664e-31	AVR78_RS01130	transketolase
AVR78_RS01235	104.18	19.1791	2.4415	1.8881e-51	1.2084e-51	AVR78_RS01235	glycoside hydrolase family 1 protein
AVR78_RS01240	102.444	39.7531	1.3657	4.2304e-41	1.9278e-41	AVR78_RS01240	GntR family transcriptional regulator
AVR78_RS01260	164.952	30.3379	2.4429	2.0791e-80	2.9909e-80	AVR78_RS01260	glycoside hydrolase family 31 protein
AVR78_RS01265	48.6174	16.3894	1.5687	1.956e-21	4.4347e-22	AVR78_RS01265	MFS transporter
AVR78_RS01275	81.6077	29.2918	1.4782	4.3009e-34	1.5565e-34	AVR78_RS01275	DUF1479 domain-containing protein
AVR78_RS01310	234.405	95.8956	1.2895	1.0906e-89	1.9399e-89	AVR78_RS01310	glutathione ABC transporter ATP-binding protein GsiA
AVR78_RS01340	151.061	8.02036	4.2353	2.2608e-80	3.2421e-80	AVR78_RS01340	MFS transporter
AVR78_RS01395	105.916	44.2864	1.258	3.9321e-41	1.7937e-41	AVR78_RS01395	DNA-binding transcriptional regulator
AVR78_RS01400	72.9261	14.2972	2.3507	4.0325e-36	1.5669e-36	AVR78_RS01400	integrase
AVR78_RS01420	13.8907	0	4.3159	8.7524e-09	1.1929e-09	AVR78_RS01420	hypothetical protein
AVR78_RS01445	64.2444	3.83583	4.066	2.9537e-35	1.1184e-35	AVR78_RS01445	replication endonuclease
AVR78_RS01450	29.5177	2.78969	3.4034	6.7638e-17	1.2895e-17	AVR78_RS01450	hypothetical protein
AVR78_RS01495	59.0354	3.1384	4.2335	1.7253e-32	5.9219e-33	AVR78_RS01495	late control
AVR78_RS01525	55.5627	17.0869	1.7012	5.3138e-25	1.3793e-25	AVR78_RS01525	hypothetical protein
AVR78_RS01535	88.5531	40.7992	1.118	3.4772e-33	1.2246e-33	AVR78_RS01535	30S ribosomal protein S6--L-glutamate ligase
AVR78_RS01555	52.09	17.7843	1.5504	9.399e-23	2.2268e-23	AVR78_RS01555	putrescine ABC transporter permease
AVR78_RS01580	151.061	55.4451	1.446	4.2916e-61	3.8094e-61	AVR78_RS01580	two-component sensor histidine kinase
AVR78_RS01655	159.743	20.2253	2.9815	3.8923e-82	5.8757e-82	AVR78_RS01655	DoxX family protein
AVR78_RS01665	135.434	27.8969	2.2794	6.3976e-65	6.341e-65	AVR78_RS01665	hydroxylamine reductase
AVR78_RS01670	53.8264	26.8508	1.0033	4.9056e-20	1.0547e-20	AVR78_RS01670	DUF340 domain-containing protein
AVR78_RS01775	163.215	7.67165	4.4111	2.0606e-86	3.4261e-86	AVR78_RS01775	dimethyl sulfoxide reductase anchor subunit
AVR78_RS01810	123.28	47.076	1.3889	2.0263e-49	1.2092e-49	AVR78_RS01810	DUF421 domain-containing protein
AVR78_RS01840	184.052	23.7124	2.9564	3.5923e-94	7.015e-94	AVR78_RS01840	ComEC family protein
AVR78_RS01905	36.463	7.32294	2.3159	8.6234e-19	1.7674e-19	AVR78_RS01905	hypothetical protein
AVR78_RS01950	86.8167	17.4356	2.3159	1.7953e-42	8.6357e-43	AVR78_RS01950	aliphatic sulfonates ABC transporter ATP-binding protein
AVR78_RS01955	36.463	2.78969	3.7083	1.1337e-20	2.4941e-21	ssuC	alkanesulfonate transporter permease subunit
AVR78_RS01960	71.1897	5.23067	3.7666	7.9669e-39	3.3634e-39	AVR78_RS01960	alkanesulfonate monooxygenase%2C FMNH(2)-dependent
AVR78_RS01965	20.836	5.57938	1.9009	1.0462e-10	1.5472e-11	AVR78_RS01965	aliphatic sulfonate ABC transporter substrate-binding protein
AVR78_RS02050	34.7267	11.5075	1.5935	7.6265e-16	1.385e-16	AVR78_RS02050	hypothetical protein
AVR78_RS02095	107.653	17.0869	2.6554	2.1202e-54	1.5203e-54	AVR78_RS02095	YbhB/YbcL family Raf kinase inhibitor-like protein
AVR78_RS02100	57.2991	21.9688	1.3831	7.772e-24	1.9363e-24	AVR78_RS02100	AraC family transcriptional regulator
AVR78_RS02125	8.68167	1.04613	3.0529	7.2349e-06	8.7556e-07	AVR78_RS02125	tRNA-Ser
AVR78_RS02145	107.653	33.4763	1.6852	1.0911e-46	6.0471e-47	AVR78_RS02145	iron ABC transporter substrate-binding protein
AVR78_RS02150	95.4984	13.5997	2.8119	3.5473e-49	2.0897e-49	AVR78_RS02150	iron ABC transporter permease
AVR78_RS02155	81.6077	17.4356	2.2267	1.5889e-39	6.8272e-40	AVR78_RS02155	ABC transporter ATP-binding protein
AVR78_RS02160	164.952	28.943	2.5108	4.4986e-81	6.5956e-81	AVR78_RS02160	GGDEF domain-containing protein
AVR78_RS02170	105.916	32.4302	1.7075	3.4247e-46	1.8599e-46	AVR78_RS02170	phytanoyl-CoA dioxygenase
AVR78_RS02175	36.463	4.18454	3.1233	3.0838e-20	6.6754e-21	AVR78_RS02175	PTS fructose-like transporter subunit EIIB
AVR78_RS02180	15.627	7.32294	1.0935	5.1618e-07	6.5635e-08	AVR78_RS02180	[formate-C-acetyltransferase]-activating enzyme
AVR78_RS02185	123.28	37.6608	1.7108	1.641e-53	1.141e-53	AVR78_RS02185	formate C-acetyltransferase
AVR78_RS02195	104.18	18.4817	2.4949	8.7672e-52	5.7068e-52	AVR78_RS02195	PTS fructose-like transporter subunit EIIC
AVR78_RS02200	291.704	65.209	2.1614	3.5103e-135	1.2021e-134	AVR78_RS02200	phosphoenolpyruvate--protein phosphotransferase
AVR78_RS02205	78.1351	30.6866	1.3484	1.3358e-31	4.4197e-32	AVR78_RS02205	oxidoreductase
AVR78_RS02220	105.916	27.8969	1.9247	2.8255e-48	1.6289e-48	AVR78_RS02220	BCCT family transporter
AVR78_RS02225	60.7717	8.36907	2.8603	4.7433e-32	1.6005e-32	AVR78_RS02225	LysR family transcriptional regulator
AVR78_RS02230	79.8714	28.943	1.4645	2.7569e-33	9.7246e-34	AVR78_RS02230	tartrate dehydrogenase
AVR78_RS02240	100.707	9.76392	3.3666	1.3239e-53	9.2189e-54	AVR78_RS02240	FAD-binding oxidoreductase
AVR78_RS02245	105.916	32.4302	1.7075	3.4247e-46	1.8599e-46	AVR78_RS02245	aldehyde dehydrogenase PuuC
AVR78_RS02265	6.94534	2.44098	1.5086	0.00036292	4.0083e-05	AVR78_RS02265	hypothetical protein
AVR78_RS02270	161.479	41.4967	1.9603	3.9229e-73	4.7751e-73	AVR78_RS02270	APC family permease
AVR78_RS02300	123.28	26.5021	2.2178	1.0002e-58	8.2849e-59	AVR78_RS02300	integrase
AVR78_RS02310	19.0997	8.71779	1.1315	2.3141e-08	3.0826e-09	AVR78_RS02310	hypothetical protein
AVR78_RS02315	19.0997	2.78969	2.7754	4.6729e-11	7.001e-12	AVR78_RS02315	hypothetical protein
AVR78_RS02325	10.418	1.04613	3.3159	7.3489e-07	9.2828e-08	AVR78_RS02325	hypothetical protein
AVR78_RS02335	41.672	5.92809	2.8134	2.081e-22	4.8848e-23	AVR78_RS02335	3'-5' exoribonuclease
AVR78_RS02340	36.463	7.67165	2.2488	1.2721e-18	2.5887e-19	AVR78_RS02340	DNA adenine methylase Dam
AVR78_RS02350	218.778	12.2049	4.1639	1.2365e-115	3.3184e-115	AVR78_RS02350	replication endonuclease
AVR78_RS02360	72.9261	8.36907	3.1233	7.8928e-39	3.3352e-39	AVR78_RS02360	phage portal protein
AVR78_RS02365	97.2348	7.32294	3.731	2.3355e-52	1.5465e-52	AVR78_RS02365	oxidoreductase
AVR78_RS02370	62.5081	8.71779	2.842	7.2038e-33	2.512e-33	AVR78_RS02370	phage capsid scaffolding protein
AVR78_RS02375	22.5724	5.23067	2.1095	7.2047e-12	1.1174e-12	AVR78_RS02375	phage major capsid protein%2C P2 family
AVR78_RS02380	57.2991	4.18454	3.7754	1.3832e-31	4.5733e-32	AVR78_RS02380	phage terminase endonuclease small subunit M
AVR78_RS02385	17.3633	0	5.6379	4.7761e-10	6.8616e-11	AVR78_RS02385	head completion/stabilization protein L
AVR78_RS02400	22.5724	3.83583	2.5569	1.5121e-12	2.407e-13	AVR78_RS02400	glycoside hydrolase
AVR78_RS02405	24.3087	0	5.1233	6.6396e-14	1.1206e-14	AVR78_RS02405	DUF2570 domain-containing protein
AVR78_RS02410	55.5627	1.74356	4.994	5.8611e-30	1.8137e-30	AVR78_RS02410	phage tail completion protein R
AVR78_RS02415	13.8907	2.78969	2.3159	4.6728e-08	6.1691e-09	AVR78_RS02415	phage virion morphogenesis protein
AVR78_RS02420	43.4084	1.39485	4.9598	8.3951e-24	2.0892e-24	AVR78_RS02420	phage baseplate assembly protein V
AVR78_RS02425	10.418	0	4.381	6.3819e-07	8.0813e-08	AVR78_RS02425	phage baseplate assembly protein W
AVR78_RS02430	32.9904	1.74356	4.2419	7.2042e-19	1.4845e-19	AVR78_RS02430	baseplate assembly protein J
AVR78_RS02435	41.672	2.44098	4.0935	1.8986e-23	4.6271e-24	AVR78_RS02435	phage tail protein I
AVR78_RS02440	86.8167	17.0869	2.3451	1.2203e-42	5.926e-43	AVR78_RS02440	hypothetical protein
AVR78_RS02445	10.418	0	4.381	6.3819e-07	8.0813e-08	AVR78_RS02445	hypothetical protein
AVR78_RS02450	279.55	19.1791	3.8655	3.0533e-147	1.24e-146	AVR78_RS02450	phage tail fiber protein
AVR78_RS02460	48.6174	2.09227	4.5383	6.9803e-27	1.9532e-27	AVR78_RS02460	bacteriophage tail fiber protein U
AVR78_RS02465	239.614	14.2972	4.0669	1.5284e-126	4.739e-126	AVR78_RS02465	phage tail tape measure protein
AVR78_RS02475	5.209	0	3.9009	0.00041908	4.6141e-05	AVR78_RS02475	hypothetical protein
AVR78_RS02480	59.0354	2.78969	4.4034	2.1467e-32	7.3354e-33	AVR78_RS02480	phage major tail tube protein
AVR78_RS02485	78.1351	10.4613	2.9009	7.499e-41	3.3772e-41	AVR78_RS02485	major tail sheath protein FI
AVR78_RS02490	123.28	7.67165	4.0063	4.8744e-66	5.038e-66	AVR78_RS02490	late control D family protein
AVR78_RS02520	24.3087	0	6.1233	5.3385e-13	8.6231e-14	AVR78_RS02520	hypothetical protein
AVR78_RS02530	125.016	60.6758	1.0429	5.6589e-45	2.9277e-45	AVR78_RS02530	EamA/RhaT family transporter
AVR78_RS02545	125.016	7.67165	4.0264	6.0975e-67	6.5073e-67	AVR78_RS02545	pyrimidine utilization transport protein G
AVR78_RS02550	19.0997	4.53325	2.0749	3.2632e-10	4.7225e-11	AVR78_RS02550	FMN reductase
AVR78_RS02555	8.68167	1.04613	3.0529	7.2349e-06	8.7556e-07	AVR78_RS02555	malonic semialdehyde reductase
AVR78_RS02560	26.045	3.48711	2.9009	1.0995e-14	1.9105e-15	AVR78_RS02560	pyrimidine utilization protein D
AVR78_RS02570	26.045	0	5.2228	1.0318e-14	1.7962e-15	AVR78_RS02570	pyrimidine utilization protein B
AVR78_RS02575	71.1897	8.02036	3.1499	5.2711e-38	2.1714e-38	AVR78_RS02575	pyrimidine monooxygenase RutA
AVR78_RS02605	65.9807	27.5482	1.2601	2.8317e-26	7.7396e-27	AVR78_RS02605	DUF3574 domain-containing protein
AVR78_RS02635	125.016	31.7327	1.9781	3.223e-57	2.5326e-57	AVR78_RS02635	thiol:disulfide interchange protein DsbA
AVR78_RS02640	26.045	1.39485	4.2228	3.1779e-15	5.6328e-16	AVR78_RS02640	tRNA-Ser
AVR78_RS02645	41.672	17.4356	1.257	3.6468e-17	7.0434e-18	AVR78_RS02645	nicotinamidase YcaC
AVR78_RS02650	32.9904	5.92809	2.4764	1.7371e-17	3.3936e-18	AVR78_RS02650	pirin family protein
AVR78_RS02655	149.325	59.6297	1.3244	2.1096e-58	1.7165e-58	AVR78_RS02655	LysR family transcriptional regulator
AVR78_RS02660	38.1994	1.39485	4.7754	2.6529e-21	5.9795e-22	AVR78_RS02660	tRNA-Ser
AVR78_RS02715	15.627	4.53325	1.7854	3.2346e-08	4.2963e-09	AVR78_RS02715	YceK/YidQ family lipoprotein
AVR78_RS02725	34.7267	14.9946	1.2116	2.271e-14	3.9106e-15	AVR78_RS02725	multidrug transporter MdtG
AVR78_RS02730	119.807	6.27681	4.2545	4.1219e-64	4.0075e-64	AVR78_RS02730	hypothetical protein
AVR78_RS02750	8.68167	1.39485	2.6379	1.0506e-05	1.2578e-06	AVR78_RS02750	DUF2770 domain-containing protein
AVR78_RS02815	147.588	65.209	1.1784	3.1305e-55	2.3246e-55	AVR78_RS02815	LysR family transcriptional regulator
AVR78_RS02940	13.8907	0	4.796	1.1197e-08	1.5171e-09	AVR78_RS02940	hypothetical protein
AVR78_RS03020	52.09	22.3175	1.2228	7.46e-21	1.6562e-21	AVR78_RS03020	hypothetical protein
AVR78_RS03035	93.7621	38.3583	1.2895	5.9496e-37	2.3804e-37	AVR78_RS03035	4-hydroxythreonine-4-phosphate dehydrogenase PdxA
AVR78_RS03040	177.106	24.4098	2.8591	5.3984e-90	9.677e-90	AVR78_RS03040	type III effector Hop protein
AVR78_RS03050	15.627	5.92809	1.3984	1.3753e-07	1.7854e-08	AVR78_RS03050	PTS glucitol/sorbitol transporter subunit IIA
AVR78_RS03065	6.94534	0	4.3159	4.738e-05	5.5059e-06	AVR78_RS03065	transketolase
AVR78_RS03120	92.0258	22.3175	2.0439	4.4302e-43	2.1837e-43	AVR78_RS03120	AraC family transcriptional regulator
AVR78_RS03125	97.2348	9.76392	3.3159	1.05e-51	6.7965e-52	AVR78_RS03125	cupin domain-containing protein
AVR78_RS03160	125.016	37.3121	1.7444	1.2273e-54	8.9112e-55	AVR78_RS03160	phage integrase
AVR78_RS03170	72.9261	4.18454	4.1233	8.9248e-40	3.8784e-40	AVR78_RS03170	hypothetical protein
AVR78_RS03180	6.94534	0	3.796	4.6705e-05	5.4344e-06	AVR78_RS03180	hypothetical protein
AVR78_RS03185	15.627	3.48711	2.1639	1.0152e-08	1.3783e-09	AVR78_RS03185	class I SAM-dependent methyltransferase
AVR78_RS03190	46.881	0	6.0708	9.5711e-24	2.3755e-24	AVR78_RS03190	hypothetical protein
AVR78_RS03195	112.862	3.48711	5.0164	5.3556e-59	4.4767e-59	AVR78_RS03195	hypothetical protein
AVR78_RS03210	12.1543	0	5.1233	1.1604e-07	1.509e-08	AVR78_RS03210	XRE family transcriptional regulator
AVR78_RS03215	5.209	1.04613	2.3159	0.00082109	8.9099e-05	AVR78_RS03215	hypothetical protein
AVR78_RS03225	26.045	3.83583	2.7634	1.5829e-14	2.739e-15	AVR78_RS03225	hypothetical protein
AVR78_RS03230	3.47267	0	3.3159	0.00425	0.00044236	AVR78_RS03230	retron adenine methylase
AVR78_RS03245	251.769	5.92809	5.4084	2.5792e-126	7.9438e-126	AVR78_RS03245	DUF1133 domain-containing protein
AVR78_RS03270	3.47267	0	3.3159	0.00425	0.00044236	AVR78_RS03270	hypothetical protein
AVR78_RS03280	13.8907	0	5.3159	1.7749e-08	2.3809e-09	AVR78_RS03280	hypothetical protein
AVR78_RS03290	27.7814	9.41521	1.5611	6.9772e-13	1.1231e-13	AVR78_RS03290	hypothetical protein
AVR78_RS03300	27.7814	6.62552	2.068	3.5547e-14	6.0731e-15	AVR78_RS03300	HNH endonuclease
AVR78_RS03305	39.9357	5.92809	2.752	1.9875e-21	4.4997e-22	AVR78_RS03305	phage terminase small subunit P27 family
AVR78_RS03310	199.679	13.9485	3.8395	1.0324e-105	2.4295e-105	AVR78_RS03310	terminase large subunit
AVR78_RS03315	189.261	11.5075	4.0397	2.274e-100	4.9457e-100	AVR78_RS03315	phage portal protein
AVR78_RS03320	20.836	1.39485	3.9009	1.7192e-12	2.7318e-13	AVR78_RS03320	HK97 family phage prohead protease
AVR78_RS03325	203.151	8.36907	4.6013	1.5827e-106	3.8227e-106	AVR78_RS03325	phage major capsid protein
AVR78_RS03330	19.0997	0	4.7754	2.0809e-11	3.1568e-12	AVR78_RS03330	phage gp6-like head-tail connector protein
AVR78_RS03375	541.736	130.069	2.0583	4.7017e-245	3.3194e-244	AVR78_RS03375	phage tail tape measure protein
AVR78_RS03395	13.8907	0	4.3159	8.7524e-09	1.1929e-09	AVR78_RS03395	kinase
AVR78_RS03400	6.94534	0	3.3159	5.2724e-05	6.1067e-06	AVR78_RS03400	hypothetical protein
AVR78_RS03405	32.9904	1.04613	4.9789	1.8688e-18	3.7863e-19	AVR78_RS03405	hypothetical protein
AVR78_RS03425	213.569	31.7327	2.7507	4.3282e-107	1.0621e-106	AVR78_RS03425	translesion error-prone DNA polymerase V subunit UmuC
AVR78_RS03435	206.624	25.8046	3.0013	7.8718e-106	1.8621e-105	AVR78_RS03435	chaperonin
AVR78_RS03440	19.0997	2.09227	3.1904	2.3362e-11	3.5335e-12	AVR78_RS03440	isocitrate dehydrogenase
AVR78_RS03450	10.418	3.48711	1.579	1.0497e-05	1.2578e-06	AVR78_RS03450	amino acid-binding ACT domain-containing protein
AVR78_RS03480	92.0258	19.1791	2.2625	1.3999e-44	7.1698e-45	AVR78_RS03480	glutathione-dependent formaldehyde dehydrogenase
AVR78_RS03510	95.4984	35.5686	1.4249	4.692e-39	1.9881e-39	AVR78_RS03510	cytochrome d ubiquinol oxidase subunit II
AVR78_RS03545	109.389	9.0665	3.5928	1.6519e-58	1.3512e-58	AVR78_RS03545	carboxylase-like protein
AVR78_RS03565	170.161	47.4248	1.8432	3.0336e-75	3.8886e-75	AVR78_RS03565	type II asparaginase
AVR78_RS03630	74.6624	13.5997	2.4568	1.9408e-37	7.8607e-38	AVR78_RS03630	cyanate MFS transporter
AVR78_RS03655	52.09	16.0407	1.6993	1.5721e-23	3.858e-24	AVR78_RS03655	DinI family protein
AVR78_RS03665	112.862	27.5482	2.0345	2.3833e-52	1.5756e-52	AVR78_RS03665	translesion error-prone DNA polymerase V subunit UmuC
AVR78_RS03680	48.6174	4.88196	3.3159	1.0466e-26	2.9022e-27	AVR78_RS03680	ester cyclase
AVR78_RS03685	79.8714	4.18454	4.2545	2.4465e-43	1.2137e-43	AVR78_RS03685	alkene reductase
AVR78_RS03690	116.334	51.2606	1.1824	5.7673e-44	2.8988e-44	AVR78_RS03690	LysR family transcriptional regulator
AVR78_RS03700	118.071	15.3433	2.944	5.0332e-61	4.4504e-61	AVR78_RS03700	aspartate aminotransferase family protein
AVR78_RS03705	50.3537	0	6.1739	3.7117e-25	9.7e-26	AVR78_RS03705	hypothetical protein
AVR78_RS03710	69.4534	13.251	2.3899	1.1714e-34	4.3211e-35	AVR78_RS03710	glutamine ABC transporter substrate-binding protein GlnH
AVR78_RS03715	69.4534	27.1995	1.3525	2.6273e-28	7.7139e-29	AVR78_RS03715	glutamine ABC transporter permease GlnP
AVR78_RS03730	92.0258	6.97423	3.7219	1.2162e-49	7.3727e-50	AVR78_RS03730	MFS transporter
AVR78_RS03735	140.643	40.1018	1.8103	4.2676e-62	3.8551e-62	AVR78_RS03735	LysR family transcriptional regulator
AVR78_RS03775	171.897	77.4139	1.1509	1.8551e-63	1.7772e-63	AVR78_RS03775	aldo/keto reductase
AVR78_RS03870	125.016	22.6662	2.4635	1.5153e-61	1.3555e-61	AVR78_RS03870	(deoxy)nucleoside triphosphate pyrophosphohydrolase
AVR78_RS03900	39.9357	12.5536	1.6696	2.7065e-18	5.4498e-19	AVR78_RS03900	carboxymuconolactone decarboxylase family protein
AVR78_RS03905	17.3633	7.32294	1.2456	5.7111e-08	7.5182e-09	AVR78_RS03905	TVP38/TMEM64 family protein
AVR78_RS03970	60.7717	25.8046	1.2358	3.7263e-24	9.406e-25	AVR78_RS03970	PTS sugar transporter subunit IIB
AVR78_RS03980	86.8167	38.707	1.1654	4.545e-33	1.5934e-33	AVR78_RS03980	PTS N%2CN'-diacetylchitobiose transporter subunit IIC
AVR78_RS03985	20.836	3.83583	2.4415	1.4961e-11	2.2863e-12	AVR78_RS03985	PTS N%2CN'-diacetylchitobiose transporter subunit IIA
AVR78_RS03995	114.598	20.9227	2.4534	1.6879e-56	1.2909e-56	AVR78_RS03995	6-phospho-beta-glucosidase
AVR78_RS04000	60.7717	8.36907	2.8603	4.7433e-32	1.6005e-32	AVR78_RS04000	chitin disaccharide deacetylase
AVR78_RS04010	149.325	65.5577	1.1876	5.0458e-56	3.821e-56	AVR78_RS04010	cell division activator CedA
AVR78_RS04025	50.3537	18.133	1.4735	1.2214e-21	2.7914e-22	AVR78_RS04025	2-deoxy-D-gluconate 3-dehydrogenase
AVR78_RS04045	159.743	30.6866	2.3801	2.6488e-77	3.4829e-77	AVR78_RS04045	TonB-dependent siderophore receptor
AVR78_RS04070	64.2444	7.67165	3.066	2.7315e-34	9.9722e-35	AVR78_RS04070	Fe2+-dependent dioxygenase
AVR78_RS04075	138.907	61.0245	1.1867	3.1782e-52	2.0895e-52	AVR78_RS04075	catecholate siderophore receptor Fiu
AVR78_RS04085	8.68167	2.09227	2.0529	2.3403e-05	2.7594e-06	AVR78_RS04085	hypothetical protein
AVR78_RS04090	41.672	2.44098	4.0935	1.8986e-23	4.6271e-24	AVR78_RS04090	hypothetical protein
AVR78_RS04100	74.6624	7.67165	3.2828	4.7465e-40	2.0824e-40	AVR78_RS04100	MFS transporter
AVR78_RS04105	55.5627	9.76392	2.5086	1.8329e-28	5.4125e-29	AVR78_RS04105	tartrate dehydrogenase
AVR78_RS04110	88.5531	25.1072	1.8184	8.0517e-40	3.5156e-40	AVR78_RS04110	glycerate kinase
AVR78_RS04130	46.881	8.02036	2.5473	2.24e-24	5.7109e-25	AVR78_RS04130	bifunctional anthranilate synthase glutamate amidotransferase component TrpG/anthranilate phosphoribosyltransferase TrpD
AVR78_RS04135	69.4534	21.2714	1.7071	7.0545e-31	2.2623e-31	AVR78_RS04135	anthranilate synthase component 1
AVR78_RS04150	173.633	15.3433	3.5004	1.5607e-91	2.8764e-91	AVR78_RS04150	drug/metabolite transporter permease
AVR78_RS04175	31.254	2.78969	3.4859	7.5483e-18	1.4963e-18	AVR78_RS04175	hypothetical protein
AVR78_RS04250	57.2991	22.6662	1.338	1.5173e-23	3.7316e-24	AVR78_RS04250	stress response translation initiation inhibitor YciH
AVR78_RS04295	64.2444	13.5997	2.24	1.54e-31	5.0697e-32	AVR78_RS04295	hypothetical protein
AVR78_RS04300	97.2348	47.076	1.0465	2.0848e-35	7.9131e-36	AVR78_RS04300	ABC transporter substrate-binding protein
AVR78_RS04305	55.5627	19.1791	1.5346	4.5211e-24	1.1381e-24	AVR78_RS04305	polar amino acid ABC transporter permease
AVR78_RS04315	104.18	40.1018	1.3773	6.6677e-42	3.1318e-42	AVR78_RS04315	histidine/lysine/arginine/ornithine ABC transporter ATP-binding protein HisP
AVR78_RS04325	50.3537	17.0869	1.5592	4.2871e-22	9.9112e-23	AVR78_RS04325	peptide ABC transporter ATP-binding protein SapF
AVR78_RS04355	48.6174	13.5997	1.8379	1.0688e-22	2.5283e-23	AVR78_RS04355	nucleoside-diphosphate sugar epimerase
AVR78_RS04370	74.6624	31.0353	1.2665	1.4343e-29	4.3649e-30	AVR78_RS04370	amidohydrolase
AVR78_RS04375	95.4984	9.0665	3.3969	5.4955e-51	3.4405e-51	AVR78_RS04375	MFS transporter
AVR78_RS04450	142.379	67.9987	1.0662	2.1762e-51	1.3889e-51	AVR78_RS04450	hypothetical protein
AVR78_RS04455	78.1351	36.266	1.1074	2.2415e-29	6.7719e-30	AVR78_RS04455	LysR family transcriptional regulator
AVR78_RS04460	97.2348	19.1791	2.3419	1.5877e-47	8.951e-48	AVR78_RS04460	alpha/beta hydrolase
AVR78_RS04465	78.1351	5.23067	3.9009	1.6863e-42	8.137e-43	AVR78_RS04465	MFS transporter
AVR78_RS04500	57.2991	28.2456	1.0205	2.3704e-21	5.3481e-22	AVR78_RS04500	DUF3131 domain-containing protein
AVR78_RS04530	97.2348	16.7381	2.5383	1.0787e-48	6.2661e-49	AVR78_RS04530	ATP-binding protein
AVR78_RS04540	13.8907	3.48711	1.994	1.0273e-07	1.3386e-08	AVR78_RS04540	LysR family transcriptional regulator
AVR78_RS04545	105.916	26.8508	1.9799	9.1237e-49	5.3066e-49	AVR78_RS04545	3-oxoacyl-ACP reductase
AVR78_RS04560	59.0354	23.3637	1.3373	3.3189e-24	8.4007e-25	AVR78_RS04560	NAD(P)-dependent oxidoreductase
AVR78_RS04570	78.1351	6.97423	3.4859	3.5997e-42	1.7101e-42	AVR78_RS04570	dehydrogenase/reductase oxidoreductase
AVR78_RS04575	92.0258	36.9634	1.3159	1.405e-36	5.5487e-37	AVR78_RS04575	AraC family transcriptional regulator
AVR78_RS04580	8.68167	3.1384	1.4679	7.3401e-05	8.4527e-06	AVR78_RS04580	DUF1471 domain-containing protein
AVR78_RS04590	86.8167	19.1791	2.1784	1.2348e-41	5.7412e-42	AVR78_RS04590	LysR family transcriptional regulator
AVR78_RS04605	210.097	25.1072	3.0649	4.8008e-108	1.2105e-107	AVR78_RS04605	NmrA/HSCARG family protein
AVR78_RS04615	88.5531	10.1126	3.1304	8.5349e-47	4.7475e-47	AVR78_RS04615	class I and II aminotransferase
AVR78_RS04630	86.8167	25.4559	1.77	1.093e-38	4.5892e-39	AVR78_RS04630	ABC transporter permease
AVR78_RS04635	79.8714	8.71779	3.1956	1.5516e-42	7.5031e-43	AVR78_RS04635	aspartate/tyrosine/aromatic aminotransferase
AVR78_RS04640	24.3087	11.5075	1.0789	4.2345e-10	6.0992e-11	AVR78_RS04640	YitT family protein
AVR78_RS04645	48.6174	23.015	1.0789	1.028e-18	2.0995e-19	AVR78_RS04645	Lrp/AsnC family transcriptional regulator
AVR78_RS04650	147.588	13.9485	3.4034	8.0684e-78	1.0701e-77	AVR78_RS04650	aromatic amino acid transporter AroP
AVR78_RS04665	114.598	56.1425	1.0294	3.5495e-41	1.624e-41	AVR78_RS04665	oxidoreductase
AVR78_RS04670	41.672	19.8766	1.068	3.3227e-16	6.1366e-17	AVR78_RS04670	DeoR/GlpR transcriptional regulator
AVR78_RS04695	19.0997	3.1384	2.6054	6.8281e-11	1.0183e-11	AVR78_RS04695	integrase
AVR78_RS04735	10.418	1.04613	3.3159	7.3489e-07	9.2828e-08	AVR78_RS04735	hypothetical protein
AVR78_RS04755	46.881	4.88196	3.2635	9.4748e-26	2.5264e-26	AVR78_RS04755	DedA family protein
AVR78_RS04760	50.3537	2.09227	4.589	9.6273e-28	2.7578e-28	AVR78_RS04760	hypothetical protein
AVR78_RS04775	50.3537	13.5997	1.8885	1.1208e-23	2.7682e-24	AVR78_RS04775	DUF1318 domain-containing protein
AVR78_RS04795	8.68167	2.09227	2.0529	2.3403e-05	2.7594e-06	AVR78_RS04795	hypothetical protein
AVR78_RS04800	29.5177	6.62552	2.1555	3.6254e-15	6.4037e-16	AVR78_RS04800	ABC transporter substrate-binding protein
AVR78_RS04805	17.3633	5.23067	1.731	6.9355e-09	9.5177e-10	AVR78_RS04805	phytanoyl-CoA dioxygenase
AVR78_RS04815	50.3537	10.8101	2.2197	5.2708e-25	1.3689e-25	AVR78_RS04815	LysR family transcriptional regulator
AVR78_RS04820	64.2444	13.5997	2.24	1.54e-31	5.0697e-32	AVR78_RS04820	hypothetical protein
AVR78_RS04825	13.8907	0	4.3159	8.7524e-09	1.1929e-09	AVR78_RS04825	RidA family protein
AVR78_RS04830	43.4084	8.02036	2.4362	2.0951e-22	4.9128e-23	AVR78_RS04830	DUF1028 domain-containing protein
AVR78_RS04835	52.09	5.92809	3.1354	3.0828e-28	9.0109e-29	AVR78_RS04835	acetylornithine deacetylase
AVR78_RS04840	36.463	4.18454	3.1233	3.0838e-20	6.6754e-21	AVR78_RS04840	phytanoyl-CoA dioxygenase
AVR78_RS04860	19.0997	0	4.7754	2.0809e-11	3.1568e-12	AVR78_RS04860	DNA helicase
AVR78_RS04955	100.707	13.251	2.926	3.0289e-52	1.9942e-52	AVR78_RS04955	hypothetical protein
AVR78_RS04965	62.5081	19.5278	1.6785	8.7689e-28	2.5151e-28	AVR78_RS04965	RND transporter NodT
AVR78_RS04995	67.7171	17.7843	1.9289	1.6456e-31	5.398e-32	AVR78_RS04995	MFS transporter
AVR78_RS05000	64.2444	6.27681	3.3555	8.2022e-35	3.0453e-35	AVR78_RS05000	aldo/keto reductase
AVR78_RS05010	52.09	13.5997	1.9374	1.1721e-24	3.0168e-25	AVR78_RS05010	acetyl-CoA C-acyltransferase
AVR78_RS05015	60.7717	4.88196	3.6379	2.5673e-33	9.0625e-34	AVR78_RS05015	A-factor biosynthesis repeat-containing protein
AVR78_RS05020	55.5627	3.83583	3.8565	1.0482e-30	3.3336e-31	AVR78_RS05020	HAD-IB family hydrolase
AVR78_RS05065	57.2991	10.1126	2.5024	2.795e-29	8.4052e-30	AVR78_RS05065	MFS transporter
AVR78_RS05080	144.116	41.8454	1.7841	3.0702e-63	2.899e-63	AVR78_RS05080	aldehyde dehydrogenase
AVR78_RS05120	26.045	3.48711	2.9009	1.0995e-14	1.9105e-15	AVR78_RS05120	hypothetical protein
AVR78_RS05130	48.6174	24.0611	1.0148	2.551e-18	5.148e-19	AVR78_RS05130	pyridoxal phosphate-dependent aminotransferase
AVR78_RS05185	43.4084	16.3894	1.4052	1.5034e-18	3.0527e-19	AVR78_RS05185	GlpM family protein
AVR78_RS05195	102.444	34.8711	1.5547	3.5222e-43	1.738e-43	AVR78_RS05195	arginine:ornithine antiporter
AVR78_RS05200	62.5081	6.62552	3.2379	9.7783e-34	3.4921e-34	AVR78_RS05200	hypothetical protein
AVR78_RS05260	78.1351	9.41521	3.0529	2.6843e-41	1.2343e-41	AVR78_RS05260	p-aminobenzoyl-glutamate transporter
AVR78_RS05265	60.7717	7.67165	2.9858	2.3536e-32	8.0302e-33	AVR78_RS05265	amidohydrolase
AVR78_RS05270	32.9904	10.1126	1.7059	1.696e-15	3.0391e-16	AVR78_RS05270	amidohydrolase
AVR78_RS05290	41.672	5.57938	2.9009	1.4525e-22	3.4236e-23	AVR78_RS05290	3-oxoacid CoA-transferase subunit alpha
AVR78_RS05295	31.254	7.32294	2.0935	8.0366e-16	1.4577e-16	AVR78_RS05295	CoA transferase subunit B
AVR78_RS05360	43.4084	18.133	1.2594	7.9332e-18	1.5706e-18	AVR78_RS05360	FAD:protein FMN transferase
AVR78_RS05375	36.463	7.32294	2.3159	8.6234e-19	1.7674e-19	AVR78_RS05375	hypothetical protein
AVR78_RS05395	39.9357	11.5075	1.7951	9.0099e-19	1.845e-19	AVR78_RS05395	malonate decarboxylase subunit epsilon
AVR78_RS05405	39.9357	8.02036	2.3159	1.9769e-20	4.3077e-21	AVR78_RS05405	AEC family transporter
AVR78_RS05410	24.3087	1.39485	4.1233	2.5321e-14	4.3439e-15	AVR78_RS05410	biotin-independent malonate decarboxylase subunit gamma
AVR78_RS05415	12.1543	2.78969	2.1233	4.7801e-07	6.0832e-08	AVR78_RS05415	biotin-independent malonate decarboxylase subunit beta
AVR78_RS05425	59.0354	2.78969	4.4034	2.1467e-32	7.3354e-33	AVR78_RS05425	triphosphoribosyl-dephospho-CoA synthase
AVR78_RS05430	81.6077	27.8969	1.5486	1.0718e-34	3.96e-35	AVR78_RS05430	malonate decarboxylase subunit alpha
AVR78_RS05470	38.1994	8.71779	2.1315	4.1782e-19	8.6759e-20	AVR78_RS05470	acid-shock protein
AVR78_RS05500	85.0804	23.3637	1.8646	1.1188e-38	4.6931e-39	AVR78_RS05500	voltage-gated ClC-type chloride channel ClcB
AVR78_RS05550	149.325	43.5889	1.7764	2.3616e-65	2.3871e-65	AVR78_RS05550	MFS transporter
AVR78_RS05605	38.1994	4.18454	3.1904	3.3354e-21	7.4884e-22	AVR78_RS05605	hypothetical protein
AVR78_RS05625	50.3537	2.44098	4.3666	6.7481e-28	1.9525e-28	AVR78_RS05625	helix-turn-helix transcriptional regulator
AVR78_RS05630	6.94534	1.39485	2.3159	0.00011193	1.2737e-05	AVR78_RS05630	hypothetical protein
AVR78_RS05640	98.9711	11.5075	3.1044	5.2077e-52	3.3947e-52	AVR78_RS05640	GntP family transporter
AVR78_RS05645	20.836	2.78969	2.9009	4.7989e-12	7.4957e-13	AVR78_RS05645	hydroxypyruvate isomerase
AVR78_RS05655	45.1447	8.02036	2.4928	2.1636e-23	5.2422e-24	AVR78_RS05655	four-carbon acid sugar kinase family protein
AVR78_RS05660	48.6174	6.27681	2.9534	3.7168e-26	1.0081e-26	AVR78_RS05660	NAD(P)-dependent oxidoreductase
AVR78_RS05685	104.18	39.4044	1.4027	3.4061e-42	1.6231e-42	lacY	MFS transporter
AVR78_RS05710	88.5531	24.4098	1.8591	3.8332e-40	1.6866e-40	AVR78_RS05710	N-acetyltransferase
AVR78_RS05725	26.045	5.57938	2.2228	1.0901e-13	1.8151e-14	AVR78_RS05725	hypothetical protein
AVR78_RS05735	95.4984	4.53325	4.3969	2.4358e-51	1.5503e-51	AVR78_RS05735	urea ABC transporter substrate-binding protein
AVR78_RS05740	55.5627	9.0665	2.6155	8.5454e-29	2.5498e-29	AVR78_RS05740	urea ABC transporter permease subunit UrtB
AVR78_RS05745	64.2444	8.02036	3.0018	3.8155e-34	1.382e-34	AVR78_RS05745	urea ABC transporter permease subunit UrtC
AVR78_RS05750	22.5724	3.83583	2.5569	1.5121e-12	2.407e-13	AVR78_RS05750	urea ABC transporter ATP-binding protein UrtD
AVR78_RS05755	72.9261	4.18454	4.1233	8.9248e-40	3.8784e-40	AVR78_RS05755	urea ABC transporter ATP-binding subunit UrtE
AVR78_RS05770	173.633	45.6812	1.9264	5.3229e-78	7.1424e-78	AVR78_RS05770	O-acetylserine/cysteine exporter
AVR78_RS05810	97.2348	11.1588	3.1233	3.4615e-51	2.182e-51	AVR78_RS05810	L-lactate dehydrogenase
AVR78_RS05825	125.016	35.9173	1.7994	2.8354e-55	2.1089e-55	AVR78_RS05825	succinate-semialdehyde dehydrogenase
AVR78_RS05850	59.0354	24.4098	1.2741	8.9082e-24	2.2157e-24	AVR78_RS05850	tagaturonate reductase
AVR78_RS05860	32.9904	3.1384	3.3939	1.0753e-18	2.194e-19	AVR78_RS05860	tautomerase family protein
AVR78_RS05890	85.0804	38.0095	1.1625	2.0661e-32	7.0702e-33	AVR78_RS05890	LysR family transcriptional regulator
AVR78_RS05910	20.836	6.97423	1.579	4.6052e-10	6.6249e-11	AVR78_RS05910	ABC transporter
AVR78_RS05920	46.881	9.41521	2.3159	1.0497e-23	2.5996e-24	AVR78_RS05920	isopenicillin N synthase family oxygenase
AVR78_RS05940	52.09	20.9227	1.3159	2.0258e-21	4.5818e-22	AVR78_RS05940	AraC family transcriptional regulator
AVR78_RS05945	52.09	8.36907	2.6379	3.685e-27	1.0432e-27	AVR78_RS05945	MFS transporter
AVR78_RS05950	32.9904	8.71779	1.92	3.8206e-16	7.0442e-17	AVR78_RS05950	oxidoreductase
AVR78_RS05955	34.7267	14.6459	1.2456	1.6432e-14	2.8391e-15	AVR78_RS05955	aromatic ring-hydroxylating dioxygenase subunit alpha
AVR78_RS05960	116.334	30.6866	1.9226	7.9328e-53	5.4011e-53	AVR78_RS05960	LysR family transcriptional regulator
AVR78_RS05965	69.4534	9.0665	2.9374	1.3209e-36	5.2211e-37	AVR78_RS05965	flavoprotein monooxygenase
AVR78_RS05970	100.707	25.1072	2.004	1.1802e-46	6.525e-47	AVR78_RS05970	purine permease
AVR78_RS06010	3.47267	0	2.3159	0.0063016	0.00065161	AVR78_RS06010	hypothetical protein
AVR78_RS06015	62.5081	11.1588	2.4859	9.9373e-32	3.3069e-32	AVR78_RS06015	serine hydrolase
AVR78_RS06060	17.3633	8.36907	1.0529	1.4918e-07	1.9339e-08	AVR78_RS06060	phosphoenolpyruvate-dependent sugar phosphotransferase system%2C EIIA 2
AVR78_RS06075	109.389	38.3583	1.5119	1.682e-45	8.8924e-46	AVR78_RS06075	6-phospho-alpha-glucosidase
AVR78_RS06080	72.9261	24.0611	1.5997	1.446e-31	4.7739e-32	AVR78_RS06080	PTS glucose-like transporter subunit IIB
AVR78_RS06090	48.6174	8.36907	2.5383	3.4066e-25	8.9229e-26	AVR78_RS06090	sulfite exporter TauE/SafE family protein
AVR78_RS06095	112.862	32.7789	1.7837	6.5198e-50	3.9786e-50	AVR78_RS06095	LysR family transcriptional regulator
AVR78_RS06110	164.952	29.2918	2.4935	6.5909e-81	9.5714e-81	AVR78_RS06110	AcrB/AcrD/AcrF family protein
AVR78_RS06115	38.1994	7.67165	2.3159	1.305e-19	2.7636e-20	AVR78_RS06115	efflux RND transporter periplasmic adaptor subunit
AVR78_RS06135	90.2894	17.7843	2.344	2.8682e-44	1.4576e-44	AVR78_RS06135	hypothetical protein
AVR78_RS06140	126.752	25.4559	2.3159	3.4431e-61	3.0621e-61	AVR78_RS06140	sigma-54-dependent Fis family transcriptional regulator
AVR78_RS06160	83.3441	37.3121	1.1594	9.3932e-32	3.1418e-32	AVR78_RS06160	peptidoglycan-binding protein LysM
AVR78_RS06180	310.804	21.9688	3.8225	2.0658e-163	9.3863e-163	AVR78_RS06180	urea carboxylase
AVR78_RS06185	29.5177	5.92809	2.3159	1.6639e-15	2.9826e-16	AVR78_RS06185	urea carboxylase-associated protein 1
AVR78_RS06190	31.254	10.8101	1.5317	3.2787e-14	5.612e-15	AVR78_RS06190	urea carboxylase-associated protein 2
AVR78_RS06195	57.2991	1.39485	5.3603	3.1954e-30	9.9889e-31	AVR78_RS06195	ABC transporter ATP-binding protein
AVR78_RS06200	10.418	1.39485	2.9009	1.0234e-06	1.285e-07	AVR78_RS06200	ABC transporter permease
AVR78_RS06205	83.3441	14.6459	2.5086	7.5873e-42	3.5529e-42	AVR78_RS06205	urea ABC transporter substrate-binding protein
AVR78_RS06220	79.8714	29.2918	1.4472	3.8827e-33	1.3633e-33	AVR78_RS06220	DUF4354 domain-containing protein
AVR78_RS06225	69.4534	5.23067	3.731	6.7056e-38	2.7451e-38	AVR78_RS06225	oxalate/formate MFS antiporter
AVR78_RS06230	62.5081	19.5278	1.6785	8.7689e-28	2.5151e-28	AVR78_RS06230	N-acetyltransferase
AVR78_RS06235	27.7814	12.2049	1.1867	1.0424e-11	1.6026e-12	AVR78_RS06235	HAD-IB family hydrolase
AVR78_RS06255	119.807	20.2253	2.5665	9.0648e-60	7.7034e-60	AVR78_RS06255	MFS transporter
AVR78_RS06280	72.9261	15.692	2.2164	1.8908e-35	7.1948e-36	AVR78_RS06280	nitronate monooxygenase
AVR78_RS06285	95.4984	16.3894	2.5427	7.0324e-48	4.0189e-48	AVR78_RS06285	allantoate amidohydrolase
AVR78_RS06290	71.1897	14.2972	2.3159	3.8795e-35	1.4581e-35	AVR78_RS06290	alanine--glyoxylate aminotransferase family protein
AVR78_RS06295	24.3087	3.1384	2.9534	7.3945e-14	1.243e-14	AVR78_RS06295	amino acid ABC transporter ATP-binding protein
AVR78_RS06300	17.3633	1.39485	3.6379	1.2879e-10	1.8968e-11	AVR78_RS06300	amino acid ABC transporter permease
AVR78_RS06305	27.7814	6.97423	1.994	5.2233e-14	8.8612e-15	AVR78_RS06305	amino acid ABC transporter permease
AVR78_RS06310	86.8167	20.574	2.0772	5.728e-41	2.5923e-41	AVR78_RS06310	amino acid ABC transporter substrate-binding protein
AVR78_RS06320	111.125	13.5997	3.0305	6.7294e-58	5.3707e-58	AVR78_RS06320	gamma-glutamyltransferase family protein
AVR78_RS06330	46.881	9.76392	2.2635	1.5469e-23	3.7982e-24	AVR78_RS06330	AtzE family amidohydrolase
AVR78_RS06340	29.5177	3.1384	3.2335	8.9273e-17	1.6845e-17	AVR78_RS06340	GNAT family N-acetyltransferase
AVR78_RS06345	114.598	36.9634	1.6324	5.4027e-49	3.1664e-49	AVR78_RS06345	aspartate-semialdehyde dehydrogenase
AVR78_RS06360	64.2444	23.3637	1.4593	4.5942e-27	1.295e-27	AVR78_RS06360	MFS transporter
AVR78_RS06405	24.3087	10.8101	1.1691	2.2561e-10	3.293e-11	AVR78_RS06405	EamA-like transporter family protein
AVR78_RS06410	34.7267	3.1384	3.4679	1.2012e-19	2.5472e-20	AVR78_RS06410	EamA-like transporter family protein
AVR78_RS06445	3.47267	1.39485	1.3159	0.014135	0.0014291	AVR78_RS06445	IS66 family transposase
AVR78_RS06470	48.6174	11.5075	2.0789	1.1018e-23	2.7229e-24	AVR78_RS06470	FAA hydrolase family protein
AVR78_RS06475	107.653	49.8657	1.1103	7.1588e-40	3.1347e-40	AVR78_RS06475	MFS transporter
AVR78_RS06480	27.7814	3.83583	2.8565	1.6412e-15	2.9431e-16	AVR78_RS06480	lysine transporter LysE
AVR78_RS06485	36.463	16.7381	1.1233	1.2749e-14	2.2112e-15	AVR78_RS06485	histidine phosphatase family protein
AVR78_RS06495	55.5627	16.7381	1.731	3.6912e-25	9.6519e-26	AVR78_RS06495	AraC family transcriptional regulator
AVR78_RS06500	102.444	20.2253	2.3406	5.7393e-50	3.507e-50	AVR78_RS06500	sulfite exporter TauE/SafE family protein
AVR78_RS06505	65.9807	23.015	1.5195	3.5738e-28	1.0413e-28	AVR78_RS06505	allantoinase PuuE
AVR78_RS06520	43.4084	11.5075	1.9154	9.8396e-21	2.173e-21	AVR78_RS06520	cytosine/purine/uracil/thiamine/allantoin permease
AVR78_RS06525	114.598	8.02036	3.8368	1.8078e-61	1.6109e-61	AVR78_RS06525	guanine deaminase
AVR78_RS06550	62.5081	14.9946	2.0596	6.9056e-30	2.1311e-30	AVR78_RS06550	gfo/Idh/MocA family oxidoreductase
AVR78_RS06580	17.3633	1.74356	3.3159	1.6278e-10	2.3865e-11	AVR78_RS06580	ABC transporter permease
AVR78_RS06585	55.5627	16.7381	1.731	3.6912e-25	9.6519e-26	AVR78_RS06585	NMT1/THI5 like domain-containing protein
AVR78_RS06600	78.1351	35.5686	1.1354	1.2069e-29	3.6824e-30	AVR78_RS06600	LysR family transcriptional regulator
AVR78_RS06605	154.534	16.0407	3.2681	6.5457e-81	9.536e-81	AVR78_RS06605	cytochrome c biogenesis protein/redoxin
AVR78_RS06620	64.2444	20.2253	1.6674	1.9355e-28	5.7119e-29	AVR78_RS06620	alpha/beta hydrolase
AVR78_RS06645	3.47267	1.39485	1.3159	0.014135	0.0014291	AVR78_RS06645	pyrroloquinoline quinone biosynthesis protein PqqD
AVR78_RS06665	53.8264	21.6201	1.3159	4.4243e-22	1.0213e-22	AVR78_RS06665	glutamine amidotransferase
AVR78_RS06670	154.534	24.7585	2.6419	3.4909e-77	4.564e-77	AVR78_RS06670	penicillin-binding protein 2
AVR78_RS06690	41.672	13.9485	1.579	1.2137e-18	2.4711e-19	AVR78_RS06690	magnesium transporter MgtC
AVR78_RS06695	112.862	22.3175	2.3383	7.5262e-55	5.4822e-55	AVR78_RS06695	MFS transporter
AVR78_RS06710	45.1447	16.7381	1.4314	2.3307e-19	4.9063e-20	AVR78_RS06710	hypothetical protein
AVR78_RS06715	93.7621	26.8508	1.804	6.1424e-42	2.8881e-42	AVR78_RS06715	cation transporter
AVR78_RS06720	19.0997	2.44098	2.968	3.254e-11	4.9024e-12	AVR78_RS06720	hypothetical protein
AVR78_RS06780	8.68167	1.39485	2.6379	1.0506e-05	1.2578e-06	AVR78_RS06780	hypothetical protein
AVR78_RS06785	95.4984	38.3583	1.3159	6.7936e-38	2.7786e-38	AVR78_RS06785	hypothetical protein
AVR78_RS06800	93.7621	44.6351	1.0708	1.7246e-34	6.3314e-35	AVR78_RS06800	LysR family transcriptional regulator
AVR78_RS06805	20.836	6.62552	1.653	3.206e-10	4.6426e-11	AVR78_RS06805	MBL fold hydrolase
AVR78_RS06830	24.3087	10.4613	1.2164	1.6349e-10	2.3962e-11	AVR78_RS06830	hypothetical protein
AVR78_RS06840	206.624	66.6039	1.6333	6.9207e-87	1.1633e-86	AVR78_RS06840	MarR family transcriptional regulator
AVR78_RS06875	64.2444	11.8562	2.4379	2.2303e-32	7.6152e-33	AVR78_RS06875	ABC transporter ATP-binding protein
AVR78_RS06885	31.254	13.5997	1.2005	4.8515e-13	7.8614e-14	AVR78_RS06885	alkylhydroperoxidase domain protein
AVR78_RS06890	90.2894	44.9838	1.0052	1.5846e-32	5.4512e-33	AVR78_RS06890	MFS transporter AraJ
AVR78_RS06895	39.9357	7.32294	2.4472	9.1013e-21	2.0138e-21	AVR78_RS06895	VOC family protein
AVR78_RS06915	69.4534	2.44098	4.8305	2.6731e-37	1.0789e-37	AVR78_RS06915	formate dehydrogenase cytochrome b556 subunit
AVR78_RS06920	67.7171	5.23067	3.6945	5.679e-37	2.2741e-37	AVR78_RS06920	formate dehydrogenase subunit beta
AVR78_RS06925	100.707	9.76392	3.3666	1.3239e-53	9.2189e-54	AVR78_RS06925	formate dehydrogenase-N subunit alpha
AVR78_RS06930	41.672	1.74356	4.579	3.0098e-23	7.2427e-24	AVR78_RS06930	nitrate inducible formate dehydrogenase subunit alpha
AVR78_RS06935	31.254	2.09227	3.9009	5.5598e-18	1.1093e-18	AVR78_RS06935	hypothetical protein
AVR78_RS06940	79.8714	32.4302	1.3003	7.8958e-32	2.6448e-32	AVR78_RS06940	drug/metabolite DMT transporter permease
AVR78_RS06945	71.1897	6.62552	3.4256	1.7001e-38	7.086e-39	benD	1%2C6-dihydroxycyclohexa-2%2C4-diene-1-carboxylate dehydrogenase
AVR78_RS06950	36.463	7.32294	2.3159	8.6234e-19	1.7674e-19	AVR78_RS06950	NADH oxidoreductase for HCP
AVR78_RS06955	27.7814	1.39485	4.3159	4.0723e-16	7.4931e-17	AVR78_RS06955	benzoate 1%2C2-dioxygenase small subunit
AVR78_RS06960	67.7171	10.4613	2.6945	5.3083e-35	1.9837e-35	AVR78_RS06960	3-phenylpropionate dioxygenase subunit alpha
AVR78_RS07025	208.36	9.41521	4.4679	1.2471e-109	3.1971e-109	AVR78_RS07025	iron ABC transporter permease
AVR78_RS07030	43.4084	8.02036	2.4362	2.0951e-22	4.9128e-23	AVR78_RS07030	ABC transporter substrate-binding protein
AVR78_RS07035	19.0997	5.57938	1.7754	1.0276e-09	1.4578e-10	AVR78_RS07035	ABC transporter ATP-binding protein
AVR78_RS07050	92.0258	8.02036	3.5203	2.0851e-49	1.2411e-49	AVR78_RS07050	alpha-L-rhamnosidase
AVR78_RS07055	50.3537	7.67165	2.7145	1.6649e-26	4.5915e-27	AVR78_RS07055	MFS transporter
AVR78_RS07060	109.389	13.5997	3.0078	6.2109e-57	4.8145e-57	AVR78_RS07060	porin
AVR78_RS07070	53.8264	25.8046	1.0607	1.9885e-20	4.331e-21	AVR78_RS07070	glutathione S-transferase family protein
AVR78_RS07075	22.5724	4.53325	2.3159	3.2976e-12	5.1806e-13	AVR78_RS07075	amino acid ABC transporter substrate-binding protein
AVR78_RS07080	38.1994	8.36907	2.1904	2.8372e-19	5.929e-20	AVR78_RS07080	amino acid ABC transporter ATP-binding protein
AVR78_RS07085	86.8167	5.23067	4.0529	4.9066e-47	2.7459e-47	AVR78_RS07085	amino acid ABC transporter permease
AVR78_RS07090	15.627	0	5.4859	2.8498e-09	3.9715e-10	AVR78_RS07090	N-acetyltransferase
AVR78_RS07095	38.1994	10.8101	1.8212	4.0904e-18	8.2041e-19	AVR78_RS07095	ABC transporter substrate-binding protein
AVR78_RS07100	81.6077	33.1276	1.3007	1.7337e-32	5.9462e-33	AVR78_RS07100	FMN-dependent monooxygenase
AVR78_RS07105	78.1351	7.67165	3.3484	5.9132e-42	2.7889e-42	AVR78_RS07105	amidohydrolase
AVR78_RS07110	72.9261	5.57938	3.7083	1.0789e-39	4.6619e-40	AVR78_RS07110	MsnO8 family LLM class oxidoreductase
AVR78_RS07115	29.5177	12.2049	1.2741	1.1731e-12	1.8731e-13	AVR78_RS07115	hypothetical protein
AVR78_RS07120	60.7717	27.1995	1.1598	1.3305e-23	3.279e-24	AVR78_RS07120	cell envelope integrity/translocation protein TolA
AVR78_RS07125	19.0997	1.74356	3.4534	1.7681e-11	2.6938e-12	AVR78_RS07125	SAM-dependent methyltransferase
AVR78_RS07130	100.707	33.4763	1.589	7.8851e-43	3.8536e-43	AVR78_RS07130	diaminopimelate epimerase
AVR78_RS07135	34.7267	7.67165	2.1784	1.2411e-17	2.4413e-18	AVR78_RS07135	hypothetical protein
AVR78_RS07210	97.2348	21.2714	2.1926	1.6052e-46	8.8111e-47	AVR78_RS07210	alpha/beta hydrolase
AVR78_RS07220	8.68167	1.39485	2.6379	1.0506e-05	1.2578e-06	AVR78_RS07220	stress response membrane protein YncL
AVR78_RS07270	52.09	9.0665	2.5224	7.8932e-27	2.2019e-27	AVR78_RS07270	cytochrome d ubiquinol oxidase subunit II
AVR78_RS07280	60.7717	6.62552	3.1973	8.8923e-33	3.0914e-33	AVR78_RS07280	hypothetical protein
AVR78_RS07285	24.3087	3.1384	2.9534	7.3945e-14	1.243e-14	AVR78_RS07285	hypothetical protein
AVR78_RS07295	36.463	2.78969	3.7083	1.1337e-20	2.4941e-21	AVR78_RS07295	hypothetical protein
AVR78_RS07305	92.0258	19.8766	2.211	3.0268e-44	1.5348e-44	AVR78_RS07305	benzoate membrane transporter
AVR78_RS07325	48.6174	23.3637	1.0572	1.395e-18	2.8351e-19	AVR78_RS07325	tellurite resistance methyltransferase TehB
AVR78_RS07340	69.4534	30.6866	1.1784	6.7398e-27	1.8882e-27	AVR78_RS07340	50S ribosomal protein L7/L12-serine acetyltransferase
AVR78_RS07360	34.7267	16.3894	1.0833	8.0085e-14	1.3428e-14	AVR78_RS07360	protocatechuate 3%2C4-dioxygenase subunit beta
AVR78_RS07365	65.9807	17.7843	1.8914	1.5656e-30	4.9481e-31	AVR78_RS07365	protocatechuate 3%2C4-dioxygenase subunit alpha
AVR78_RS07395	55.5627	20.2253	1.458	1.2802e-23	3.1568e-24	AVR78_RS07395	hypothetical protein
AVR78_RS07405	59.0354	25.1072	1.2335	1.7029e-23	4.1701e-24	AVR78_RS07405	transcriptional regulator
AVR78_RS07430	112.862	27.8969	2.0164	3.4847e-52	2.2877e-52	AVR78_RS07430	beta-glucosidase
AVR78_RS07480	65.9807	19.8766	1.731	1.441e-29	4.3823e-30	AVR78_RS07480	hypothetical protein
AVR78_RS07525	109.389	8.02036	3.7697	1.0348e-58	8.5562e-59	AVR78_RS07525	GGDEF domain-containing protein
AVR78_RS07570	32.9904	14.6459	1.1715	1.4442e-13	2.3953e-14	AVR78_RS07570	alkene reductase
AVR78_RS07595	97.2348	33.1276	1.5534	4.6415e-41	2.111e-41	AVR78_RS07595	AraC family transcriptional regulator
AVR78_RS07640	22.5724	3.48711	2.6945	1.0316e-12	1.6513e-13	AVR78_RS07640	hypothetical protein
AVR78_RS07645	211.833	57.8861	1.8716	9.6495e-94	1.8528e-93	AVR78_RS07645	TIGR00730 family Rossman fold protein
AVR78_RS07650	5.209	1.04613	2.3159	0.00082109	8.9099e-05	AVR78_RS07650	tRNA-Val
AVR78_RS07665	72.9261	23.3637	1.6422	7.0879e-32	2.3794e-32	AVR78_RS07665	oxidoreductase
AVR78_RS07670	81.6077	33.825	1.2706	3.3297e-32	1.131e-32	AVR78_RS07670	AraC family transcriptional regulator
AVR78_RS07680	27.7814	7.67165	1.8565	1.1171e-13	1.8587e-14	AVR78_RS07680	hypothetical protein
AVR78_RS07685	20.836	6.62552	1.653	3.206e-10	4.6426e-11	AVR78_RS07685	MBL fold metallo-hydrolase
AVR78_RS07725	149.325	41.8454	1.8353	3.7465e-66	3.8986e-66	AVR78_RS07725	DeoR/GlpR transcriptional regulator
AVR78_RS07730	13.8907	2.78969	2.3159	4.6728e-08	6.1691e-09	AVR78_RS07730	glyoxalase I%2C nickel isomerase
AVR78_RS07740	41.672	6.62552	2.653	4.3751e-22	1.0109e-22	AVR78_RS07740	SfnB family sulfur acquisition oxidoreductase
AVR78_RS07745	22.5724	4.53325	2.3159	3.2976e-12	5.1806e-13	AVR78_RS07745	ABC transporter permease
AVR78_RS07750	22.5724	2.44098	3.209	3.6138e-13	5.8892e-14	AVR78_RS07750	NLPA lipoprotein
AVR78_RS07755	92.0258	4.53325	4.3434	1.3651e-49	8.2428e-50	AVR78_RS07755	methionine ABC transporter ATP-binding protein
AVR78_RS07760	67.7171	6.97423	3.2794	1.7678e-36	6.9695e-37	AVR78_RS07760	ABC transporter substrate-binding protein
AVR78_RS07765	32.9904	1.74356	4.2419	7.2042e-19	1.4845e-19	AVR78_RS07765	ABC transporter permease
AVR78_RS07770	34.7267	0	6.6379	4.3285e-17	8.3355e-18	AVR78_RS07770	ABC transporter permease
AVR78_RS07775	31.254	4.53325	2.7854	3.6888e-17	7.1215e-18	AVR78_RS07775	ABC transporter ATP-binding protein
AVR78_RS07780	20.836	3.1384	2.731	6.9301e-12	1.0759e-12	AVR78_RS07780	ABC transporter ATP-binding protein
AVR78_RS07795	65.9807	27.5482	1.2601	2.8317e-26	7.7396e-27	AVR78_RS07795	LuxR family transcriptional regulator
AVR78_RS07800	121.543	6.27681	4.2753	5.4027e-65	5.3665e-65	AVR78_RS07800	MFS transporter
AVR78_RS07810	177.106	36.9634	2.2604	4.3188e-84	6.7642e-84	AVR78_RS07810	APC family permease
AVR78_RS07835	53.8264	3.1384	4.1002	8.297e-30	2.5554e-30	AVR78_RS07835	isopenicillin N synthase family oxygenase
AVR78_RS07840	147.588	7.67165	4.2659	1.558e-78	2.1216e-78	AVR78_RS07840	amidohydrolase
AVR78_RS07845	78.1351	4.18454	4.2228	1.8829e-42	9.0477e-43	AVR78_RS07845	ABC transporter substrate-binding protein
AVR78_RS07860	31.254	6.97423	2.1639	5.456e-16	9.9911e-17	AVR78_RS07860	oxidoreductase
AVR78_RS07865	19.0997	2.78969	2.7754	4.6729e-11	7.001e-12	AVR78_RS07865	cytosine deaminase
AVR78_RS07875	17.3633	5.57938	1.6379	1.003e-08	1.3626e-09	AVR78_RS07875	creatininase
AVR78_RS07880	31.254	3.83583	3.0264	1.8146e-17	3.5361e-18	AVR78_RS07880	ABC transporter substrate-binding protein
AVR78_RS07885	27.7814	4.18454	2.731	2.3712e-15	4.2324e-16	AVR78_RS07885	ABC transporter ATP-binding protein
AVR78_RS07890	29.5177	3.83583	2.944	1.7175e-16	3.204e-17	AVR78_RS07890	ABC transporter permease
AVR78_RS07895	34.7267	4.53325	2.9374	4.0493e-19	8.4159e-20	AVR78_RS07895	FAD-binding oxidoreductase
AVR78_RS07915	52.09	19.1791	1.4415	3.7673e-22	8.727e-23	AVR78_RS07915	chromate resistance protein
AVR78_RS07925	38.1994	18.4817	1.0475	6.9899e-15	1.2243e-15	AVR78_RS07925	4-oxalocrotonate tautomerase
AVR78_RS07930	24.3087	3.1384	2.9534	7.3945e-14	1.243e-14	AVR78_RS07930	transcriptional regulator
AVR78_RS07935	50.3537	24.7585	1.0242	5.5945e-19	1.1596e-19	AVR78_RS07935	MFS transporter
AVR78_RS07950	95.4984	36.9634	1.3694	1.8038e-38	7.5117e-39	AVR78_RS07950	LysR family transcriptional regulator
AVR78_RS07975	88.5531	38.0095	1.2202	2.8152e-34	1.0269e-34	AVR78_RS07975	GntP family permease
AVR78_RS07980	53.8264	25.1072	1.1002	1.0778e-20	2.3756e-21	AVR78_RS07980	3-hydroxybutyrate dehydrogenase
AVR78_RS07985	53.8264	23.015	1.2257	1.6295e-21	3.7055e-22	AVR78_RS07985	LysR family transcriptional regulator
AVR78_RS07990	39.9357	7.67165	2.3801	1.3408e-20	2.9426e-21	AVR78_RS07990	acetolactate decarboxylase
AVR78_RS07995	76.3987	7.67165	3.3159	5.286e-41	2.3949e-41	AVR78_RS07995	acetolactate synthase AlsS
AVR78_RS08000	86.8167	8.36907	3.3748	1.7958e-46	9.8339e-47	AVR78_RS08000	diacetyl reductase ((S)-acetoin forming)
AVR78_RS08040	24.3087	3.83583	2.6639	1.5405e-13	2.5512e-14	AVR78_RS08040	cytochrome c-type biogenesis protein CcmH
AVR78_RS08045	20.836	3.1384	2.731	6.9301e-12	1.0759e-12	AVR78_RS08045	DsbE family thiol:disulfide interchange protein
AVR78_RS08050	98.9711	23.3637	2.0827	1.6766e-46	9.1923e-47	AVR78_RS08050	heme lyase CcmF/NrfE family subunit
AVR78_RS08065	69.4534	10.8101	2.6837	8.1033e-36	3.1197e-36	AVR78_RS08065	cytochrome c-type biogenesis protein CcmC heme lyase for CcmE
AVR78_RS08070	31.254	10.4613	1.579	2.3001e-14	3.9592e-15	AVR78_RS08070	heme exporter protein CcmB
AVR78_RS08105	135.434	63.4655	1.0935	1.9813e-49	1.1855e-49	AVR78_RS08105	iron ABC transporter permease
AVR78_RS08115	17.3633	0	4.6379	1.5031e-10	2.2072e-11	AVR78_RS08115	hypothetical protein
AVR78_RS08125	166.688	16.0407	3.3773	1.4853e-87	2.5152e-87	AVR78_RS08125	formate dehydrogenase subunit alpha
AVR78_RS08160	52.09	15.692	1.731	1.0919e-23	2.6997e-24	AVR78_RS08160	amino acid ABC transporter ATP-binding protein
AVR78_RS08180	31.254	8.71779	1.842	3.6908e-15	6.5142e-16	AVR78_RS08180	MurR/RpiR family transcriptional regulator
AVR78_RS08185	20.836	9.0665	1.2005	3.5748e-09	4.9516e-10	AVR78_RS08185	iron compound-binding protein of ABC transporter family
AVR78_RS08205	128.489	36.6147	1.8111	6.7544e-57	5.2182e-57	AVR78_RS08205	TonB-dependent siderophore receptor
AVR78_RS08210	64.2444	4.88196	3.718	3.5315e-35	1.3296e-35	AVR78_RS08210	ABC transporter ATP-binding protein
AVR78_RS08215	19.0997	4.53325	2.0749	3.2632e-10	4.7225e-11	AVR78_RS08215	ABC transporter permease
AVR78_RS08220	50.3537	4.18454	3.589	7.3464e-28	2.1216e-28	AVR78_RS08220	ABC transporter substrate-binding protein
AVR78_RS08225	19.0997	6.97423	1.4534	4.3725e-09	6.0383e-10	AVR78_RS08225	aliphatic sulfonate ABC transporter substrate-binding protein
AVR78_RS08230	34.7267	11.8562	1.5504	1.088e-15	1.9641e-16	AVR78_RS08230	acyl-CoA dehydrogenase
AVR78_RS08245	38.1994	11.5075	1.731	8.5704e-18	1.6945e-18	AVR78_RS08245	cysteine dioxygenase
AVR78_RS08250	57.2991	16.0407	1.8368	1.8684e-26	5.1465e-27	AVR78_RS08250	GlpE family protein
AVR78_RS08260	57.2991	15.3433	1.9009	8.8447e-27	2.4614e-27	AVR78_RS08260	3-(3-hydroxy-phenyl)propionate transporter MhpT
AVR78_RS08265	95.4984	9.41521	3.3424	7.1369e-51	4.4439e-51	AVR78_RS08265	4-hydroxy-2-oxovalerate aldolase
AVR78_RS08270	22.5724	4.53325	2.3159	3.2976e-12	5.1806e-13	AVR78_RS08270	acetaldehyde dehydrogenase (acetylating)
AVR78_RS08275	26.045	1.74356	3.9009	3.0622e-15	5.4361e-16	AVR78_RS08275	2-keto-4-pentenoate hydratase
AVR78_RS08280	57.2991	3.48711	4.0384	1.2479e-31	4.1377e-32	AVR78_RS08280	alpha/beta hydrolase fold protein
AVR78_RS08285	26.045	4.53325	2.5224	3.3859e-14	5.7935e-15	mhpB	3-carboxyethylcatechol 2%2C3-dioxygenase
AVR78_RS08290	85.0804	4.18454	4.3457	5.5733e-46	2.9983e-46	mhpA	3-(3-hydroxyphenyl)propionate hydroxylase
AVR78_RS08295	83.3441	13.251	2.653	1.6622e-42	8.0292e-43	AVR78_RS08295	DNA-binding transcriptional activator MhpR
AVR78_RS08320	53.8264	9.0665	2.5697	8.2025e-28	2.36e-28	AVR78_RS08320	shikimate dehydrogenase
AVR78_RS08325	29.5177	9.41521	1.6485	7.3854e-14	1.243e-14	AVR78_RS08325	MFS transporter
AVR78_RS08400	123.28	32.4302	1.9265	6.4804e-56	4.8912e-56	AVR78_RS08400	hypothetical protein
AVR78_RS08410	53.8264	13.251	2.0222	8.358e-26	2.2351e-26	AVR78_RS08410	alpha-hydroxy-acid oxidizing protein
AVR78_RS08415	286.495	37.3121	2.9408	2.5206e-145	9.9717e-145	AVR78_RS08415	AcrB/AcrD/AcrF family protein
AVR78_RS08430	95.4984	22.3175	2.0973	4.8581e-45	2.5219e-45	AVR78_RS08430	NAD-dependent epimerase
AVR78_RS08435	45.1447	22.3175	1.0164	3.9371e-17	7.5913e-18	AVR78_RS08435	LysR family transcriptional regulator
AVR78_RS08455	62.5081	9.0665	2.7854	1.0356e-32	3.5923e-33	AVR78_RS08455	MFS transporter
AVR78_RS08485	81.6077	23.015	1.8261	6.8739e-37	2.7454e-37	AVR78_RS08485	thioesterase superfamily protein
AVR78_RS08505	31.254	4.18454	2.9009	2.5677e-17	4.9824e-18	rprA	antisense sRNA RprA
AVR78_RS08530	86.8167	17.4356	2.3159	1.7953e-42	8.6357e-43	AVR78_RS08530	hypothetical protein
AVR78_RS08650	125.016	61.3732	1.0264	1.0298e-44	5.2922e-45	AVR78_RS08650	TonB system transport protein TonB
AVR78_RS08725	20.836	7.32294	1.5086	6.5764e-10	9.3869e-11	AVR78_RS08725	hypothetical protein
AVR78_RS08790	22.5724	0	5.0164	4.3839e-13	7.1214e-14	AVR78_RS08790	RtT sRNA
AVR78_RS08795	114.598	25.8046	2.1509	3.6984e-54	2.6273e-54	AVR78_RS08795	Lrp/AsnC family transcriptional regulator
AVR78_RS08800	88.5531	14.9946	2.5621	1.2726e-44	6.5252e-45	AVR78_RS08800	EamA/RhaT family transporter
AVR78_RS08840	133.698	55.7938	1.2608	1.6753e-51	1.0783e-51	AVR78_RS08840	YchO family inverse autotransporter domain-containing protein
AVR78_RS08845	151.061	17.4356	3.115	1.8027e-78	2.4475e-78	AVR78_RS08845	nitrate reductase
AVR78_RS08860	26.045	2.78969	3.2228	5.6553e-15	9.932e-16	AVR78_RS08860	ABC transporter ATP-binding protein
AVR78_RS08865	15.627	0	4.4859	1.1248e-09	1.5927e-10	AVR78_RS08865	nitrate ABC transporter%2C permease protein
AVR78_RS08870	53.8264	5.92809	3.1827	3.359e-29	1.0075e-29	AVR78_RS08870	nitrate ABC transporter substrate-binding protein
AVR78_RS08945	32.9904	3.1384	3.3939	1.0753e-18	2.194e-19	AVR78_RS08945	hypothetical protein
AVR78_RS08980	67.7171	24.4098	1.4721	1.5695e-28	4.6467e-29	AVR78_RS08980	DUF1869 domain-containing protein
AVR78_RS08990	22.5724	1.04613	4.4314	2.3872e-13	3.9138e-14	AVR78_RS08990	hypothetical protein
AVR78_RS08995	81.6077	40.1018	1.025	9.1159e-30	2.8019e-30	AVR78_RS08995	gamma-glutamylcyclotransferase
AVR78_RS09005	78.1351	26.8508	1.541	3.1321e-33	1.1039e-33	AVR78_RS09005	RluA family pseudouridine synthase
AVR78_RS09020	78.1351	13.5997	2.5224	2.112e-39	9.0493e-40	AVR78_RS09020	ABC transporter substrate-binding protein
AVR78_RS09025	72.9261	27.5482	1.4045	4.62e-30	1.4335e-30	AVR78_RS09025	MFS transporter
AVR78_RS09035	55.5627	25.4559	1.1261	1.7314e-21	3.9315e-22	AVR78_RS09035	N-acetyltransferase
AVR78_RS09050	65.9807	17.4356	1.92	1.0755e-30	3.4154e-31	AVR78_RS09050	ABC transporter ATP-binding protein
AVR78_RS09055	83.3441	16.0407	2.3773	3.5325e-41	1.6178e-41	AVR78_RS09055	ABC transporter ATP-binding protein
AVR78_RS09060	128.489	22.3175	2.5254	1.1368e-63	1.0914e-63	AVR78_RS09060	branched-chain amino acid ABC transporter permease
AVR78_RS09065	72.9261	12.9023	2.4988	8.6387e-37	3.4383e-37	AVR78_RS09065	branched-chain amino acid ABC transporter permease
AVR78_RS09080	338.585	158.315	1.0967	6.3121e-121	1.8104e-120	AVR78_RS09080	formate C-acetyltransferase
AVR78_RS09110	13.8907	1.39485	3.3159	1.078e-08	1.461e-09	AVR78_RS09110	quaternary amine ABC transporter permease
AVR78_RS09115	27.7814	4.18454	2.731	2.3712e-15	4.2324e-16	AVR78_RS09115	ABC transporter permease
AVR78_RS09120	45.1447	6.97423	2.6945	6.909e-24	1.7259e-24	AVR78_RS09120	quaternary amine ABC transporter substrate-binding protein
AVR78_RS09125	62.5081	4.18454	3.9009	2.412e-34	8.8409e-35	AVR78_RS09125	LLM class flavin-dependent oxidoreductase
AVR78_RS09130	27.7814	6.62552	2.068	3.5547e-14	6.0731e-15	AVR78_RS09130	phosphate ABC transporter substrate-binding protein
AVR78_RS09140	137.17	61.7219	1.1521	5.0459e-51	3.1633e-51	AVR78_RS09140	ROK family transcriptional regulator
AVR78_RS09150	20.836	3.48711	2.579	1.0145e-11	1.5628e-12	AVR78_RS09150	sugar ABC transporter permease
AVR78_RS09155	26.045	3.1384	3.0529	7.7782e-15	1.3613e-15	AVR78_RS09155	carbohydrate ABC transporter permease
AVR78_RS09165	62.5081	8.02036	2.9623	3.556e-33	1.2505e-33	AVR78_RS09165	sn-glycerol-3-phosphate ABC transporter ATP-binding protein UgpC
AVR78_RS09170	24.3087	9.41521	1.3684	6.0394e-11	9.0188e-12	AVR78_RS09170	proteasome-type protease
AVR78_RS09175	27.7814	13.5997	1.0305	3.6335e-11	5.467e-12	AVR78_RS09175	transglutaminase family protein
AVR78_RS09180	46.881	4.53325	3.3704	7.1859e-26	1.9262e-26	AVR78_RS09180	alpha-E domain-containing protein
AVR78_RS09185	107.653	10.1126	3.4122	2.7925e-57	2.1981e-57	AVR78_RS09185	circularly permuted type 2 ATP-grasp protein
AVR78_RS09195	112.862	42.5428	1.4076	1.2619e-45	6.7257e-46	AVR78_RS09195	MFS transporter
AVR78_RS09215	93.7621	33.825	1.4709	7.6522e-39	3.2365e-39	AVR78_RS09215	hypothetical protein
AVR78_RS09270	29.5177	4.53325	2.703	3.5603e-16	6.5695e-17	AVR78_RS09270	DUF1971 domain-containing protein
AVR78_RS09390	19.0997	1.39485	3.7754	1.4688e-11	2.2453e-12	AVR78_RS09390	hypothetical protein
AVR78_RS09405	156.27	71.4858	1.1283	1.9984e-57	1.5785e-57	AVR78_RS09405	peptidoglycan glycosyltransferase FtsI
AVR78_RS09420	22.5724	8.71779	1.3725	2.8172e-10	4.0924e-11	AVR78_RS09420	hypothetical protein
AVR78_RS09445	48.6174	14.2972	1.7657	2.2424e-22	5.2502e-23	AVR78_RS09445	MFS transporter
AVR78_RS09510	43.4084	12.5536	1.7899	3.021e-20	6.5455e-21	AVR78_RS09510	hypothetical protein
AVR78_RS09560	81.6077	35.9173	1.184	2.2767e-31	7.431e-32	AVR78_RS09560	formate-dependent phosphoribosylglycinamide formyltransferase
AVR78_RS09600	138.907	31.7327	2.1301	4.8115e-65	4.8e-65	AVR78_RS09600	sodium:citrate symporter family protein
AVR78_RS09610	118.071	34.5224	1.774	4.9931e-52	3.264e-52	AVR78_RS09610	NAD-dependent malic enzyme
AVR78_RS09615	26.045	4.18454	2.6379	2.3063e-14	3.9654e-15	AVR78_RS09615	two-component system response regulator DcuR
AVR78_RS09715	119.807	9.0665	3.724	4.3876e-64	4.2568e-64	AVR78_RS09715	glycoside hydrolase family 105 protein
AVR78_RS09720	119.807	25.8046	2.215	4.2347e-57	3.3105e-57	AVR78_RS09720	MFS transporter
AVR78_RS09740	114.598	36.266	1.6599	2.6428e-49	1.5649e-49	araH	L-arabinose ABC transporter permease AraH
AVR78_RS09745	123.28	16.7381	2.8807	2.5335e-63	2.4021e-63	araG	L-arabinose ABC transporter ATP-binding protein AraG
AVR78_RS09750	71.1897	29.6405	1.2641	2.9815e-28	8.7314e-29	AVR78_RS09750	arabinose ABC transporter substrate-binding protein
AVR78_RS09755	43.4084	6.62552	2.7119	4.5559e-23	1.0861e-23	AVR78_RS09755	hypothetical protein
AVR78_RS09770	118.071	28.2456	2.0636	5.9127e-55	4.3275e-55	AVR78_RS09770	MFS transporter
AVR78_RS09780	133.698	19.8766	2.7498	9.64e-68	1.0508e-67	AVR78_RS09780	MFS transporter
AVR78_RS09785	88.5531	43.5889	1.0226	3.9503e-32	1.3388e-32	AVR78_RS09785	hypothetical protein
AVR78_RS09790	5.209	0	3.381	0.00045396	4.9958e-05	AVR78_RS09790	hypothetical protein
AVR78_RS09800	95.4984	24.7585	1.9476	6.9396e-44	3.4766e-44	AVR78_RS09800	DUF2492 domain-containing protein
AVR78_RS09825	6.94534	1.39485	2.3159	0.00011193	1.2737e-05	AVR78_RS09825	tRNA-Leu
AVR78_RS09950	45.1447	10.8101	2.0622	4.7697e-22	1.1005e-22	AVR78_RS09950	tRNA-Ser
AVR78_RS09960	6.94534	1.74356	1.994	0.00016783	1.8914e-05	AVR78_RS09960	tRNA-Asn
AVR78_RS09975	67.7171	18.133	1.9009	2.3966e-31	7.8112e-32	AVR78_RS09975	nitrogen assimilation transcriptional regulator
AVR78_RS09990	159.743	25.4559	2.6497	8.7192e-80	1.2312e-79	AVR78_RS09990	Na+/H+ antiporter
AVR78_RS10015	92.0258	12.9023	2.8344	1.5218e-47	8.5896e-48	AVR78_RS10015	signal transduction protein PmrD
AVR78_RS10035	145.852	66.2552	1.1384	6.7552e-54	4.7473e-54	AVR78_RS10035	FMN/FAD transporter
AVR78_RS10045	22.5724	2.78969	3.0164	4.998e-13	8.0875e-14	AVR78_RS10045	tRNA-Asn
AVR78_RS10070	88.5531	21.2714	2.0576	1.2865e-41	5.9754e-42	AVR78_RS10070	LysR family transcriptional regulator
AVR78_RS10075	78.1351	16.0407	2.2842	3.1309e-38	1.2932e-38	AVR78_RS10075	DUF1869 domain-containing protein
AVR78_RS10080	6.94534	1.74356	1.994	0.00016783	1.8914e-05	AVR78_RS10080	DUF1971 domain-containing protein
AVR78_RS10095	8.68167	1.04613	3.0529	7.2349e-06	8.7556e-07	AVR78_RS10095	hypothetical protein
AVR78_RS10115	48.6174	13.5997	1.8379	1.0688e-22	2.5283e-23	AVR78_RS10115	tautomerase family protein
AVR78_RS10120	83.3441	29.2918	1.5086	4.743e-35	1.7754e-35	AVR78_RS10120	HPP family protein
AVR78_RS10155	121.543	35.9173	1.7587	2.4764e-53	1.714e-53	AVR78_RS10155	serine-type D-Ala-D-Ala carboxypeptidase DacD
AVR78_RS10165	255.241	114.377	1.1581	1.527e-93	2.9197e-93	AVR78_RS10165	elongation factor G
AVR78_RS10170	48.6174	19.8766	1.2904	5.9147e-20	1.2683e-20	AVR78_RS10170	ArsR family transcriptional regulator
AVR78_RS10175	291.704	24.0611	3.5997	7.0186e-153	3.0675e-152	AVR78_RS10175	pyruvate:ferredoxin (flavodoxin) oxidoreductase
AVR78_RS10180	39.9357	2.78969	3.8395	1.5815e-22	3.7257e-23	AVR78_RS10180	nitrogenase iron protein
AVR78_RS10185	121.543	8.71779	3.8014	4.6538e-65	4.6528e-65	AVR78_RS10185	nitrogenase molybdenum-iron protein alpha chain
AVR78_RS10190	62.5081	8.36907	2.9009	5.0425e-33	1.7664e-33	AVR78_RS10190	nitrogenase molybdenum-iron protein subunit beta
AVR78_RS10195	6.94534	0	3.796	4.6705e-05	5.4344e-06	AVR78_RS10195	putative nitrogen fixation protein NifT
AVR78_RS10200	15.627	0	5.4859	2.8498e-09	3.9715e-10	AVR78_RS10200	NifY protein
AVR78_RS10205	55.5627	1.39485	5.3159	1.9473e-29	5.9023e-30	AVR78_RS10205	nitrogenase iron-molybdenum cofactor biosynthesis protein NifE
AVR78_RS10210	48.6174	1.04613	5.5383	1.3542e-25	3.5902e-26	AVR78_RS10210	nitrogenase iron-molybdenum cofactor biosynthesis protein NifN
AVR78_RS10215	32.9904	1.39485	4.5639	9.6163e-19	1.9674e-19	AVR78_RS10215	dinitrogenase iron-molybdenum cofactor biosynthesis protein
AVR78_RS10220	38.1994	1.74356	4.4534	1.6259e-21	3.7011e-22	AVR78_RS10220	Fe-S cluster assembly protein NifU
AVR78_RS10225	86.8167	8.02036	3.4362	1.3966e-46	7.6848e-47	AVR78_RS10225	cysteine desulfurase NifS
AVR78_RS10230	50.3537	14.2972	1.8164	2.3652e-23	5.7187e-24	AVR78_RS10230	homocitrate synthase
AVR78_RS10240	6.94534	1.39485	2.3159	0.00011193	1.2737e-05	AVR78_RS10240	nitrogen fixation protein NifZ
AVR78_RS10245	43.4084	6.62552	2.7119	4.5559e-23	1.0861e-23	AVR78_RS10245	nitrogen fixation protein NifM
AVR78_RS10250	92.0258	4.88196	4.2365	1.1222e-49	6.8119e-50	AVR78_RS10250	flavodoxin
AVR78_RS10255	83.3441	8.71779	3.257	1.8938e-44	9.6564e-45	AVR78_RS10255	nitrogen fixation negative regulator NifL
AVR78_RS10260	86.8167	10.8101	3.0056	1.5135e-45	8.048e-46	AVR78_RS10260	nif-specific transcriptional activator NifA
AVR78_RS10265	78.1351	6.97423	3.4859	3.5997e-42	1.7101e-42	AVR78_RS10265	nitrogenase cofactor biosynthesis protein NifB
AVR78_RS10270	76.3987	9.76392	2.968	3.4873e-40	1.5388e-40	AVR78_RS10270	NifQ family protein
AVR78_RS10305	34.7267	12.9023	1.4284	3.0925e-15	5.4858e-16	AVR78_RS10305	histidinol-phosphate transaminase
AVR78_RS10330	111.125	35.2199	1.6577	7.6908e-48	4.3788e-48	AVR78_RS10330	bifunctional phosphoribosyl-AMP cyclohydrolase/phosphoribosyl-ATP diphosphatase
AVR78_RS10440	158.006	57.8861	1.4487	7.2746e-64	6.9986e-64	AVR78_RS10440	glycosyltransferase family 2 protein
AVR78_RS10455	102.444	46.7273	1.1325	2.6388e-38	1.0949e-38	AVR78_RS10455	EpsG family protein
AVR78_RS10460	135.434	64.1629	1.0778	3.6448e-49	2.1444e-49	AVR78_RS10460	glycosyltransferase family 1 protein
AVR78_RS10465	199.679	86.1317	1.2131	6.6807e-75	8.4924e-75	AVR78_RS10465	undecaprenyl-phosphate galactose phosphotransferase WbaP
AVR78_RS10525	74.6624	33.4763	1.1572	1.338e-28	3.9716e-29	AVR78_RS10525	molecular chaperone
AVR78_RS10530	74.6624	12.5536	2.5723	6.1572e-38	2.5228e-38	AVR78_RS10530	histidine kinase
AVR78_RS10535	39.9357	5.23067	2.9326	9.6504e-22	2.2077e-22	AVR78_RS10535	DNA-binding response regulator
AVR78_RS10550	144.116	22.6662	2.6686	2.6485e-72	3.1651e-72	AVR78_RS10550	dicarboxylate/amino acid:cation symporter
AVR78_RS10560	158.006	46.3786	1.7685	6.2693e-69	6.9661e-69	AVR78_RS10560	multidrug transporter subunit MdtB
AVR78_RS10565	92.0258	36.6147	1.3296	1.0104e-36	4.0076e-37	AVR78_RS10565	multidrug transporter subunit MdtC
AVR78_RS10570	48.6174	20.9227	1.2164	1.5661e-19	3.3073e-20	AVR78_RS10570	multidrug transporter subunit MdtD
AVR78_RS10575	67.7171	28.2456	1.2615	6.2046e-27	1.7415e-27	AVR78_RS10575	two-component system sensor histidine kinase BaeA
AVR78_RS10595	119.807	20.9227	2.5176	1.9415e-59	1.6288e-59	AVR78_RS10595	ABC transporter ATP-binding protein
AVR78_RS10600	39.9357	4.53325	3.1391	4.9371e-22	1.1385e-22	AVR78_RS10600	ABC transporter ATP-binding protein
AVR78_RS10605	55.5627	2.44098	4.5086	1.6434e-30	5.1867e-31	AVR78_RS10605	ABC transporter permease
AVR78_RS10610	76.3987	5.92809	3.6879	1.7414e-41	8.064e-42	AVR78_RS10610	ABC transporter permease
AVR78_RS10615	112.862	4.88196	4.531	3.8262e-60	3.3004e-60	AVR78_RS10615	ABC transporter substrate-binding protein
AVR78_RS10620	158.006	7.32294	4.4314	1.1235e-83	1.7477e-83	AVR78_RS10620	mandelate racemase
AVR78_RS10625	283.023	9.76392	4.8573	3.4491e-146	1.3884e-145	AVR78_RS10625	hypothetical protein
AVR78_RS10630	447.974	10.8101	5.373	1.0738e-223	6.7505e-223	AVR78_RS10630	MFS transporter
AVR78_RS10635	1041.8	19.1791	5.7634	0	0	AVR78_RS10635	xylulokinase
AVR78_RS10640	1420.32	21.6201	6.0377	0	0	AVR78_RS10640	mannitol dehydrogenase family protein
AVR78_RS10645	114.598	43.9376	1.3831	5.4472e-46	2.934e-46	AVR78_RS10645	D-arabitol transcriptional regulator DalR
AVR78_RS10710	83.3441	28.943	1.5259	3.3501e-35	1.2632e-35	AVR78_RS10710	adenine deaminase
AVR78_RS10715	88.5531	12.2049	2.8591	6.5421e-46	3.5113e-46	AVR78_RS10715	NCS2 family permease
AVR78_RS10720	135.434	55.4451	1.2885	1.3961e-52	9.3665e-53	AVR78_RS10720	LysR family transcriptional regulator
AVR78_RS10825	111.125	29.6405	1.9065	2.177e-50	1.341e-50	AVR78_RS10825	6-phospho-beta-glucosidase
AVR78_RS10830	149.325	49.1683	1.6027	7.5129e-63	6.9933e-63	AVR78_RS10830	PTS beta-glucoside transporter subunit IIABC
AVR78_RS10840	98.9711	29.6405	1.7394	1.407e-43	7.0106e-44	AVR78_RS10840	carbohydrate porin
AVR78_RS10845	88.5531	33.4763	1.4034	3.937e-36	1.5311e-36	AVR78_RS10845	tRNA dihydrouridine(16) synthase DusC
AVR78_RS10890	109.389	51.958	1.0741	5.3726e-40	2.3548e-40	AVR78_RS10890	DUF418 family protein
AVR78_RS10910	38.1994	2.09227	4.1904	1.3029e-21	2.976e-22	AVR78_RS10910	hypothetical protein
AVR78_RS10925	31.254	1.04613	4.9009	1.2595e-17	2.4754e-18	AVR78_RS10925	hypothetical protein
AVR78_RS10955	29.5177	2.44098	3.596	5.4034e-17	1.0349e-17	AVR78_RS10955	glucose-inhibited division protein A
AVR78_RS10960	102.444	25.8046	1.9891	2.6476e-47	1.489e-47	AVR78_RS10960	sugar efflux transporter SetB
AVR78_RS11035	149.325	65.209	1.1953	3.6795e-56	2.8002e-56	AVR78_RS11035	microcin C ABC transporter ATP-binding protein YejF
AVR78_RS11070	90.2894	41.4967	1.1216	7.6603e-34	2.7466e-34	AVR78_RS11070	LysR family transcriptional regulator
AVR78_RS11075	118.071	30.3379	1.9605	5.7525e-54	4.055e-54	AVR78_RS11075	serine hydrolase
AVR78_RS11080	52.09	13.5997	1.9374	1.1721e-24	3.0168e-25	AVR78_RS11080	NUDIX hydrolase
AVR78_RS11085	62.5081	22.3175	1.4859	1.4836e-26	4.099e-27	AVR78_RS11085	DeoR/GlpR transcriptional regulator
AVR78_RS11210	34.7267	10.4613	1.731	2.5726e-16	4.77e-17	AVR78_RS11210	oxidoreductase
AVR78_RS11215	140.643	65.5577	1.1012	2.145e-51	1.3709e-51	AVR78_RS11215	glycerophosphodiester phosphodiesterase
AVR78_RS11235	59.0354	20.9227	1.4965	3.0823e-25	8.0828e-26	AVR78_RS11235	anaerobic glycerol-3-phosphate dehydrogenase subunit C
AVR78_RS11240	74.6624	10.1126	2.8842	4.622e-39	1.9603e-39	AVR78_RS11240	2-keto-3-deoxy-L-rhamnonate aldolase
AVR78_RS11245	92.0258	25.1072	1.8739	9.0547e-42	4.2271e-42	AVR78_RS11245	MFS transporter
AVR78_RS11250	97.2348	30.3379	1.6804	2.7024e-42	1.2918e-42	AVR78_RS11250	L-rhamnonate dehydratase
AVR78_RS11255	31.254	10.1126	1.6279	1.6073e-14	2.7791e-15	AVR78_RS11255	IclR family transcriptional regulator
AVR78_RS11270	38.1994	1.39485	4.7754	2.6529e-21	5.9795e-22	AVR78_RS11270	hypothetical protein
AVR78_RS11285	159.743	75.6704	1.078	1.1361e-57	9.0204e-58	AVR78_RS11285	HAMP domain-containing histidine kinase
AVR78_RS11300	8.68167	4.18454	1.0529	0.00020335	2.2793e-05	AVR78_RS11300	tripartite tricarboxylate transporter TctB family protein
AVR78_RS11310	152.797	75.6704	1.0138	5.1863e-54	3.6615e-54	AVR78_RS11310	o-succinylbenzoate--CoA ligase
AVR78_RS11340	59.0354	19.1791	1.622	5.3026e-26	1.4272e-26	AVR78_RS11340	GNAT family N-acetyltransferase
AVR78_RS11505	81.6077	25.4559	1.6807	8.8923e-36	3.4177e-36	AVR78_RS11505	N-acetyltransferase
AVR78_RS11580	85.0804	41.4967	1.0358	4.4459e-31	1.4368e-31	AVR78_RS11580	aspartate-semialdehyde dehydrogenase
AVR78_RS11595	189.261	63.1168	1.5843	8.1866e-79	1.1248e-78	AVR78_RS11595	arabinose transporter
AVR78_RS11685	43.4084	18.133	1.2594	7.9332e-18	1.5706e-18	AVR78_RS11685	hypothetical protein
AVR78_RS11705	6.94534	0	4.3159	4.738e-05	5.5059e-06	AVR78_RS11705	hypothetical protein
AVR78_RS11800	57.2991	12.5536	2.1904	4.1777e-28	1.2141e-28	AVR78_RS11800	phage major capsid protein
AVR78_RS11805	57.2991	4.53325	3.6599	1.593e-31	5.2328e-32	AVR78_RS11805	Clp protease ClpP
AVR78_RS11810	164.952	50.5632	1.7059	6.6155e-71	7.6278e-71	AVR78_RS11810	phage portal protein
AVR78_RS11815	211.833	28.5943	2.8891	1.5776e-107	3.9133e-107	AVR78_RS11815	terminase large subunit
AVR78_RS11840	31.254	14.9946	1.0596	1.702e-12	2.7054e-13	AVR78_RS11840	lipoprotein
AVR78_RS11855	3.47267	0	3.3159	0.00425	0.00044236	AVR78_RS11855	hypothetical protein
AVR78_RS11880	64.2444	2.44098	4.718	8.7881e-35	3.2602e-35	AVR78_RS11880	antitermination protein from phage origin
AVR78_RS11900	67.7171	4.88196	3.794	4.9892e-37	2.0014e-37	AVR78_RS11900	helix-turn-helix domain-containing protein
AVR78_RS11915	17.3633	2.44098	2.8305	3.1658e-10	4.5888e-11	AVR78_RS11915	putative DNA-binding transcriptional regulator
AVR78_RS11935	114.598	2.44098	5.553	6.0181e-58	4.8197e-58	AVR78_RS11935	hypothetical protein
AVR78_RS11940	17.3633	2.09227	3.0529	2.2228e-10	3.2455e-11	AVR78_RS11940	hypothetical protein
AVR78_RS11945	3.47267	0	3.3159	0.00425	0.00044236	AVR78_RS11945	hypothetical protein
AVR78_RS11955	26.045	0	5.2228	1.0318e-14	1.7962e-15	AVR78_RS11955	DUF550 domain-containing protein
AVR78_RS11960	41.672	0	6.9009	1.1831e-19	2.5112e-20	AVR78_RS11960	hypothetical protein
AVR78_RS11980	38.1994	6.97423	2.4534	6.0064e-20	1.2874e-20	AVR78_RS11980	tRNA-Arg
AVR78_RS11985	31.254	8.71779	1.842	3.6908e-15	6.5142e-16	AVR78_RS11985	GGDEF domain-containing protein
AVR78_RS12000	105.916	25.4559	2.0569	1.9982e-49	1.194e-49	AVR78_RS12000	transcriptional regulator CynR
AVR78_RS12010	55.5627	9.76392	2.5086	1.8329e-28	5.4125e-29	AVR78_RS12010	cyanate transporter
AVR78_RS12050	154.534	61.0245	1.3405	1.1716e-60	1.0222e-60	AVR78_RS12050	ion channel protein
AVR78_RS12075	3.47267	0	3.3159	0.00425	0.00044236	AVR78_RS12075	tRNA-Ala
AVR78_RS12080	5.209	0	2.9009	0.00054889	6.0101e-05	AVR78_RS12080	tRNA-Ala
AVR78_RS12100	10.418	1.74356	2.579	1.4984e-06	1.865e-07	AVR78_RS12100	tRNA-Val
AVR78_RS12125	164.952	36.266	2.1854	1.4381e-77	1.8964e-77	AVR78_RS12125	LysR family transcriptional regulator
AVR78_RS12185	20.836	8.02036	1.3773	1.3175e-09	1.8609e-10	AVR78_RS12185	hypothetical protein
AVR78_RS12195	116.334	34.8711	1.7382	6.7127e-51	4.1855e-51	AVR78_RS12195	transcriptional regulator PtsJ
AVR78_RS12210	138.907	59.9784	1.2116	1.2292e-52	8.2832e-53	AVR78_RS12210	sulfate/thiosulfate ABC transporter ATP-binding protein CysA
AVR78_RS12220	74.6624	36.266	1.0418	1.563e-27	4.4523e-28	AVR78_RS12220	sulfate/thiosulfate ABC transporter permease CysT
AVR78_RS12270	64.2444	20.574	1.6428	2.7727e-28	8.1355e-29	AVR78_RS12270	HTH-type transcriptional regulator EutR
AVR78_RS12275	45.1447	19.5278	1.209	3.2955e-18	6.6155e-19	AVR78_RS12275	ethanolamine utilization microcompartment protein EutK
AVR78_RS12285	65.9807	18.4817	1.8359	3.3027e-30	1.0317e-30	AVR78_RS12285	ethanolamine ammonia-lyase subunit EutC
AVR78_RS12290	147.588	36.266	2.0249	8.7711e-68	9.5835e-68	AVR78_RS12290	ethanolamine ammonia lyase large subunit
AVR78_RS12295	76.3987	32.7789	1.2208	8.2768e-30	2.5509e-30	eutA	ethanolamine ammonia-lyase reactivating factor EutA
AVR78_RS12300	79.8714	38.707	1.0451	2.2656e-29	6.8402e-30	AVR78_RS12300	ethanolamine utilization protein EutH
AVR78_RS12305	98.9711	38.3583	1.3675	8.7331e-40	3.8023e-40	AVR78_RS12305	ethanolamine utilization ethanol dehydrogenase EutG
AVR78_RS12315	168.424	64.8603	1.3767	1.2542e-66	1.3261e-66	AVR78_RS12315	aldehyde dehydrogenase EutE
AVR78_RS12320	38.1994	16.0407	1.2518	7.7258e-16	1.4024e-16	AVR78_RS12320	ethanolamine utilization microcompartment protein EutN
AVR78_RS12325	45.1447	22.3175	1.0164	3.9371e-17	7.5913e-18	AVR78_RS12325	ethanolamine utilization microcompartment protein EutM
AVR78_RS12345	20.836	9.76392	1.0935	6.7578e-09	9.2805e-10	AVR78_RS12345	ethanolamine utilization acetate kinase EutP
AVR78_RS12370	97.2348	26.1534	1.8945	3.2887e-44	1.6621e-44	AVR78_RS12370	DUF1176 domain-containing protein
AVR78_RS12385	296.913	58.5835	2.3415	2.7553e-141	1.028e-140	AVR78_RS12385	multidrug efflux RND transporter permease subunit
AVR78_RS12425	17.3633	0	4.6379	1.5031e-10	2.2072e-11	AVR78_RS12425	addiction module toxin RelE
AVR78_RS12490	140.643	61.0245	1.2046	3.7264e-53	2.5638e-53	AVR78_RS12490	6-phospho-beta-glucosidase
AVR78_RS12495	100.707	36.9634	1.446	2.5386e-41	1.1685e-41	AVR78_RS12495	ROK family protein
AVR78_RS12510	204.888	35.5686	2.5262	2.0182e-100	4.4103e-100	AVR78_RS12510	polygalacturonase
AVR78_RS12515	64.2444	24.0611	1.4169	9.0932e-27	2.5275e-27	AVR78_RS12515	MFS transporter
AVR78_RS12520	85.0804	5.57938	3.9306	3.9678e-46	2.1447e-46	AVR78_RS12520	glycosyl hydrolase
AVR78_RS12525	217.042	72.1833	1.5882	3.4231e-90	6.1846e-90	AVR78_RS12525	hypothetical protein
AVR78_RS12540	230.933	85.783	1.4287	5.5761e-92	1.0445e-91	AVR78_RS12540	sensor domain-containing phosphodiesterase
AVR78_RS12550	131.961	19.1791	2.7825	4.3605e-67	4.6753e-67	AVR78_RS12550	LysR family transcriptional regulator
AVR78_RS12625	197.942	98.6853	1.0042	3.4439e-69	3.8453e-69	AVR78_RS12625	penicillin-binding protein 1C
AVR78_RS12645	92.0258	20.2253	2.1859	4.4485e-44	2.2433e-44	AVR78_RS12645	hypothetical protein
AVR78_RS12665	15.627	6.27681	1.3159	1.9366e-07	2.4991e-08	AVR78_RS12665	ISC system 2Fe-2S type ferredoxin
AVR78_RS12710	92.0258	31.0353	1.5681	4.3115e-39	1.832e-39	AVR78_RS12710	hypothetical protein
AVR78_RS12715	100.707	37.6608	1.419	5.0092e-41	2.276e-41	AVR78_RS12715	hypothetical protein
AVR78_RS12745	26.045	1.39485	4.2228	3.1779e-15	5.6328e-16	AVR78_RS12745	hypothetical protein
AVR78_RS12750	3.47267	0	2.3159	0.0063016	0.00065161	AVR78_RS12750	hypothetical protein
AVR78_RS12785	187.524	77.0652	1.2829	5.5112e-72	6.5351e-72	AVR78_RS12785	membrane-bound lytic murein transglycosylase MltF
AVR78_RS12810	57.2991	21.2714	1.4296	3.9469e-24	9.9519e-25	acpS	holo-ACP synthase
AVR78_RS12835	60.7717	3.48711	4.1233	1.9703e-33	6.9765e-34	AVR78_RS12835	hypothetical protein
AVR78_RS12870	251.769	25.8046	3.2864	1.0111e-130	3.3143e-130	AVR78_RS12870	L-aspartate oxidase
AVR78_RS13070	15.627	1.04613	3.9009	9.9457e-10	1.4113e-10	AVR78_RS13070	molecular chaperone GrpE
AVR78_RS13120	48.6174	8.71779	2.4794	5.0021e-25	1.3006e-25	AVR78_RS13120	positive regulator of late gene transcription
AVR78_RS13125	22.5724	4.53325	2.3159	3.2976e-12	5.1806e-13	AVR78_RS13125	late control gene D protein
AVR78_RS13130	39.9357	4.18454	3.2545	3.6391e-22	8.4513e-23	AVR78_RS13130	phage tail protein
AVR78_RS13135	399.357	117.516	1.7648	3.8303e-171	1.831e-170	AVR78_RS13135	phage tail tape measure protein
AVR78_RS13145	3.47267	0	2.3159	0.0063016	0.00065161	AVR78_RS13145	phage tail assembly protein
AVR78_RS13150	59.0354	3.48711	4.0815	1.5615e-32	5.3757e-33	AVR78_RS13150	major tail tube protein
AVR78_RS13155	34.7267	2.44098	3.8305	8.5427e-20	1.8285e-20	AVR78_RS13155	phage tail sheath protein
AVR78_RS13160	203.151	15.692	3.6945	2.6996e-107	6.6604e-107	AVR78_RS13160	phage tail fiber protein
AVR78_RS13170	225.724	15.692	3.8465	2.9676e-119	8.3039e-119	AVR78_RS13170	hypothetical protein
AVR78_RS13175	50.3537	1.04613	5.589	2.3376e-26	6.4235e-27	AVR78_RS13175	phage tail protein I
AVR78_RS13180	104.18	3.1384	5.0529	1.696e-54	1.2218e-54	AVR78_RS13180	baseplate assembly protein J
AVR78_RS13200	57.2991	2.09227	4.7754	3.8785e-31	1.2561e-31	AVR78_RS13200	phage virion morphogenesis protein
AVR78_RS13215	8.68167	0	3.6379	5.4755e-06	6.6721e-07	AVR78_RS13215	phage lysis timing protein LysB
AVR78_RS13220	38.1994	1.74356	4.4534	1.6259e-21	3.7011e-22	AVR78_RS13220	lysozyme
AVR78_RS13235	29.5177	1.74356	4.0815	4.535e-17	8.7149e-18	AVR78_RS13235	head completion/stabilization protein
AVR78_RS13240	22.5724	6.27681	1.8465	2.2775e-11	3.4494e-12	AVR78_RS13240	small terminase subunit
AVR78_RS13245	43.4084	11.8562	1.8723	1.4335e-20	3.1371e-21	AVR78_RS13245	phage capsid protein
AVR78_RS13250	95.4984	2.44098	5.2899	1.9361e-49	1.1599e-49	AVR78_RS13250	phage capsid scaffolding protein
AVR78_RS13255	102.444	6.62552	3.9507	3.507e-55	2.5874e-55	AVR78_RS13255	oxidoreductase
AVR78_RS13260	65.9807	5.57938	3.5639	5.8173e-36	2.249e-36	AVR78_RS13260	phage portal protein
AVR78_RS13295	248.296	42.1941	2.5569	1.0254e-121	2.9971e-121	AVR78_RS13295	replication endonuclease
AVR78_RS13300	17.3633	2.09227	3.0529	2.2228e-10	3.2455e-11	AVR78_RS13300	DNA adenine methylase
AVR78_RS13315	8.68167	0	3.6379	5.4755e-06	6.6721e-07	AVR78_RS13315	hypothetical protein
AVR78_RS13325	71.1897	11.5075	2.6291	1.8025e-36	7.1003e-37	AVR78_RS13325	bacteriophage regulatory protein
AVR78_RS13345	17.3633	1.04613	4.0529	1.1833e-10	1.746e-11	AVR78_RS13345	integrase
AVR78_RS13355	76.3987	15.3433	2.3159	1.3898e-37	5.6491e-38	AVR78_RS13355	alpha/beta hydrolase
AVR78_RS13360	92.0258	23.015	1.9995	9.4744e-43	4.6204e-43	AVR78_RS13360	hypothetical protein
AVR78_RS13365	161.479	47.076	1.7783	1.5004e-70	1.7171e-70	AVR78_RS13365	phytanoyl-CoA dioxygenase family protein
AVR78_RS13390	190.997	41.8454	2.1904	1.3746e-89	2.4262e-89	AVR78_RS13390	thiamine pyrophosphate-binding protein
AVR78_RS13395	53.8264	18.4817	1.5422	2.0611e-23	5.0179e-24	AVR78_RS13395	Bcr/CflA family drug resistance efflux transporter
AVR78_RS13400	107.653	24.0611	2.1616	4.5275e-51	2.8461e-51	AVR78_RS13400	3-oxoacyl-ACP reductase
AVR78_RS13405	52.09	5.92809	3.1354	3.0828e-28	9.0109e-29	AVR78_RS13405	hypothetical protein
AVR78_RS13415	111.125	52.6554	1.0775	1.1875e-40	5.3113e-41	AVR78_RS13415	LysR family transcriptional regulator
AVR78_RS13420	60.7717	3.83583	3.9858	1.9061e-33	6.7599e-34	AVR78_RS13420	hypothetical protein
AVR78_RS13425	31.254	10.1126	1.6279	1.6073e-14	2.7791e-15	AVR78_RS13425	AraC family transcriptional regulator
AVR78_RS13430	104.18	38.3583	1.4415	1.2326e-42	5.9793e-43	AVR78_RS13430	multidrug efflux RND transporter periplasmic adaptor subunit OqxA
AVR78_RS13435	366.367	54.7477	2.7424	3.8441e-182	2.0046e-181	AVR78_RS13435	multidrug efflux RND transporter permease subunit OqxB
AVR78_RS13450	36.463	7.32294	2.3159	8.6234e-19	1.7674e-19	AVR78_RS13450	agmatinase
AVR78_RS13455	15.627	3.48711	2.1639	1.0152e-08	1.3783e-09	AVR78_RS13455	AP endonuclease
AVR78_RS13460	22.5724	5.23067	2.1095	7.2047e-12	1.1174e-12	AVR78_RS13460	isopenicillin N synthase family oxygenase
AVR78_RS13465	76.3987	3.1384	4.6054	3.3932e-41	1.5571e-41	AVR78_RS13465	ABC transporter substrate-binding protein
AVR78_RS13470	133.698	13.251	3.3348	1.8005e-70	2.0554e-70	AVR78_RS13470	amino acid ABC transporter permease/ATP-binding protein
AVR78_RS13475	41.672	7.67165	2.4415	1.3803e-21	3.1514e-22	AVR78_RS13475	class II aldolase
AVR78_RS13480	43.4084	5.92809	2.8723	2.1906e-23	5.3021e-24	AVR78_RS13480	glyoxylate/hydroxypyruvate reductase A
AVR78_RS13505	34.7267	11.1588	1.6379	5.3272e-16	9.767e-17	AVR78_RS13505	molecular chaperone
AVR78_RS13510	118.071	5.92809	4.3159	3.7963e-63	3.5553e-63	AVR78_RS13510	fimbrial protein
AVR78_RS13515	220.515	13.9485	3.9827	1.2553e-116	3.4085e-116	AVR78_RS13515	fimbrial biogenesis outer membrane usher protein
AVR78_RS13520	43.4084	6.62552	2.7119	4.5559e-23	1.0861e-23	AVR78_RS13520	molecular chaperone
AVR78_RS13525	78.1351	10.8101	2.8536	1.0701e-40	4.7909e-41	AVR78_RS13525	fimbrial-like protein
AVR78_RS13545	97.2348	25.4559	1.9335	1.5532e-44	7.9375e-45	AVR78_RS13545	LysR family transcriptional regulator
AVR78_RS13600	170.161	54.399	1.6452	4.3823e-72	5.2099e-72	AVR78_RS13600	PLP-dependent aminotransferase family protein
AVR78_RS13605	48.6174	5.23067	3.2164	1.3972e-26	3.8626e-27	AVR78_RS13605	carboxymuconolactone decarboxylase family protein
AVR78_RS13625	147.588	20.9227	2.8184	4.7471e-75	6.0681e-75	AVR78_RS13625	class 1b ribonucleoside-diphosphate reductase subunit beta
AVR78_RS13650	20.836	4.18454	2.3159	2.2135e-11	3.3569e-12	AVR78_RS13650	L-valine transporter subunit YgaH
AVR78_RS13680	67.7171	12.9023	2.3919	7.6611e-34	2.7466e-34	AVR78_RS13680	2-isopropylmalate synthase
AVR78_RS13775	104.18	29.2918	1.8305	1.1851e-46	6.5443e-47	AVR78_RS13775	metal ABC transporter substrate-binding protein
AVR78_RS13795	50.3537	11.8562	2.0865	1.6763e-24	4.2879e-25	srlA	PTS glucitol/sorbitol transporter subunit IIC
AVR78_RS13800	64.2444	11.5075	2.481	1.5179e-32	5.2294e-33	srlE	PTS glucitol/sorbitol transporter subunit IIB
AVR78_RS13805	19.0997	1.74356	3.4534	1.7681e-11	2.6938e-12	AVR78_RS13805	PTS glucitol/sorbitol transporter subunit IIA
AVR78_RS13810	29.5177	4.53325	2.703	3.5603e-16	6.5695e-17	AVR78_RS13810	sorbitol 6-phosphate dehydrogenase
AVR78_RS13815	24.3087	1.74356	3.8014	2.5882e-14	4.4369e-15	AVR78_RS13815	transcriptional regulator GutM
AVR78_RS13835	104.18	12.5536	3.0529	1.7889e-54	1.2867e-54	AVR78_RS13835	anaerobic nitric oxide reductase flavorubredoxin
AVR78_RS13840	67.7171	12.2049	2.4721	3.545e-34	1.2891e-34	AVR78_RS13840	NADH:flavorubredoxin reductase NorW
AVR78_RS13855	26.045	5.57938	2.2228	1.0901e-13	1.8151e-14	AVR78_RS13855	hypothetical protein
AVR78_RS13865	154.534	48.8196	1.6624	6.7934e-66	6.9587e-66	AVR78_RS13865	MFS transporter
AVR78_RS13870	100.707	26.1534	1.9451	3.667e-46	1.9844e-46	AVR78_RS13870	MFS transporter
AVR78_RS13875	31.254	3.83583	3.0264	1.8146e-17	3.5361e-18	AVR78_RS13875	amidohydrolase
AVR78_RS13880	111.125	25.4559	2.1261	2.2999e-52	1.5252e-52	AVR78_RS13880	HoxN/HupN/NixA family nickel/cobalt transporter
AVR78_RS13885	159.743	20.2253	2.9815	3.8923e-82	5.8757e-82	AVR78_RS13885	carbamoyltransferase HypF
AVR78_RS13895	170.161	37.6608	2.1758	7.7068e-80	1.0961e-79	AVR78_RS13895	ascBF operon repressor
AVR78_RS13910	154.534	33.825	2.1918	7.3606e-73	8.8193e-73	AVR78_RS13910	6-phospho-beta-glucosidase
AVR78_RS13915	29.5177	8.71779	1.7595	3.5502e-14	6.0714e-15	AVR78_RS13915	type I toxin-antitoxin system SymE family toxin
AVR78_RS13920	45.1447	7.32294	2.6241	1.0071e-23	2.4968e-24	AVR78_RS13920	hydrogenase maturation peptidase HycI
AVR78_RS13925	8.68167	0	4.6379	5.9247e-06	7.2003e-07	AVR78_RS13925	formate hydrogenlyase maturation protein HycH
AVR78_RS13930	10.418	4.53325	1.2005	2.9948e-05	3.5193e-06	AVR78_RS13930	NADH-quinone oxidoreductase subunit NuoB
AVR78_RS13935	8.68167	3.48711	1.3159	0.00010454	1.1919e-05	AVR78_RS13935	formate hydrogenlyase complex iron-sulfur subunit
AVR78_RS13940	85.0804	7.67165	3.4712	9.6788e-46	5.1767e-46	hycE	hydrogenase large subunit
AVR78_RS13945	31.254	3.48711	3.1639	1.3099e-17	2.57e-18	hycD	hydrogenase 3 membrane subunit
AVR78_RS13950	107.653	13.9485	2.9482	8.1005e-56	6.094e-56	AVR78_RS13950	formate hydrogenlyase subunit 3
AVR78_RS13955	10.418	2.44098	2.0935	3.3234e-06	4.0855e-07	AVR78_RS13955	4Fe-4S ferredoxin
AVR78_RS13960	24.3087	0	5.6034	1.6225e-13	2.6822e-14	AVR78_RS13960	hypothetical protein
AVR78_RS13965	50.3537	1.04613	5.589	2.3376e-26	6.4235e-27	AVR78_RS13965	formate hydrogenlyase regulatory protein HycA
AVR78_RS13970	12.1543	0	4.1233	7.1122e-08	9.3385e-09	AVR78_RS13970	hydrogenase nickel incorporation protein HypA
AVR78_RS13980	5.209	0	3.9009	0.00041908	4.6141e-05	AVR78_RS13980	hydrogenase assembly chaperone
AVR78_RS14000	131.961	63.1168	1.064	1.0071e-47	5.713e-48	AVR78_RS14000	glycoside hydrolase family 1 protein
AVR78_RS14005	196.206	23.015	3.0917	3.3228e-101	7.4382e-101	AVR78_RS14005	beta-1%2C4 mannanase
AVR78_RS14010	86.8167	17.0869	2.3451	1.2203e-42	5.926e-43	AVR78_RS14010	carbohydrate porin
AVR78_RS14015	27.7814	3.1384	3.146	8.2824e-16	1.5011e-16	AVR78_RS14015	hypothetical protein
AVR78_RS14020	74.6624	34.1737	1.1275	2.4967e-28	7.3491e-29	AVR78_RS14020	PTS sugar transporter subunit IIC
AVR78_RS14025	19.0997	0	4.7754	2.0809e-11	3.1568e-12	AVR78_RS14025	PTS sugar transporter subunit IIB
AVR78_RS14030	78.1351	8.02036	3.2842	7.7903e-42	3.6442e-42	AVR78_RS14030	PTS sugar transporter subunit IIC
AVR78_RS14035	10.418	4.53325	1.2005	2.9948e-05	3.5193e-06	AVR78_RS14035	molecular chaperone TorD
AVR78_RS14055	83.3441	16.0407	2.3773	3.5325e-41	1.6178e-41	AVR78_RS14055	manganese/iron transporter ATP-binding protein
AVR78_RS14060	27.7814	7.67165	1.8565	1.1171e-13	1.8587e-14	AVR78_RS14060	metal ABC transporter permease
AVR78_RS14065	71.1897	19.1791	1.8921	8.1788e-33	2.8499e-33	AVR78_RS14065	metal ABC transporter permease
AVR78_RS14070	39.9357	19.5278	1.0321	2.064e-15	3.6912e-16	AVR78_RS14070	nitrous oxide-stimulated promoter family protein
AVR78_RS14080	190.997	24.7585	2.9476	1.3779e-97	2.8483e-97	AVR78_RS14080	ferric enterobactin
AVR78_RS14085	43.4084	16.3894	1.4052	1.5034e-18	3.0527e-19	AVR78_RS14085	hemin-degrading factor
AVR78_RS14090	43.4084	6.27681	2.7899	3.147e-23	7.5649e-24	AVR78_RS14090	hemin ABC transporter substrate-binding protein
AVR78_RS14095	41.672	9.0665	2.2005	6.5124e-21	1.4479e-21	AVR78_RS14095	iron ABC transporter permease
AVR78_RS14100	19.0997	6.62552	1.5274	3.0736e-09	4.2755e-10	AVR78_RS14100	heme ABC transporter ATP-binding protein
AVR78_RS14115	31.254	1.74356	4.1639	5.668e-18	1.1299e-18	AVR78_RS14115	hypothetical protein
AVR78_RS14120	123.28	8.36907	3.8807	5.1889e-66	5.351e-66	AVR78_RS14120	UbiD family decarboxylase
AVR78_RS14125	69.4534	4.88196	3.8305	5.9887e-38	2.4604e-38	AVR78_RS14125	phenolic acid decarboxylase subunit B
AVR78_RS14135	118.071	51.2606	1.2037	6.7545e-45	3.4906e-45	AVR78_RS14135	LysR family transcriptional regulator
AVR78_RS14145	90.2894	8.36907	3.4314	2.2967e-48	1.3274e-48	AVR78_RS14145	hypothetical protein
AVR78_RS14195	39.9357	15.3433	1.3801	4.4531e-17	8.5646e-18	AVR78_RS14195	adenylyl-sulfate kinase
AVR78_RS14245	123.28	14.9946	3.0394	4.5338e-64	4.3894e-64	AVR78_RS14245	NAD(P)H-binding protein
AVR78_RS14275	211.833	79.8549	1.4075	4.8677e-84	7.5979e-84	AVR78_RS14275	two-component sensor histidine kinase BarA
AVR78_RS14280	241.351	113.68	1.0862	1.9561e-86	3.2642e-86	AVR78_RS14280	glycerate kinase
AVR78_RS14290	79.8714	38.3583	1.0581	1.675e-29	5.0905e-30	AVR78_RS14290	glucarate dehydratase
AVR78_RS14295	164.952	68.3474	1.2711	2.5702e-63	2.4319e-63	AVR78_RS14295	MFS transporter
AVR78_RS14345	93.7621	10.4613	3.1639	1.5374e-49	9.2466e-50	AVR78_RS14345	hypothetical protein
AVR78_RS14350	102.444	15.692	2.7067	4.052e-52	2.6564e-52	AVR78_RS14350	MFS transporter
AVR78_RS14355	29.5177	3.83583	2.944	1.7175e-16	3.204e-17	AVR78_RS14355	hypothetical protein
AVR78_RS14360	76.3987	9.76392	2.968	3.4873e-40	1.5388e-40	AVR78_RS14360	methionine ABC transporter substrate-binding protein
AVR78_RS14365	67.7171	0	6.6013	6.4022e-32	2.1508e-32	AVR78_RS14365	ABC transporter permease
AVR78_RS14370	48.6174	2.09227	4.5383	6.9803e-27	1.9532e-27	AVR78_RS14370	D- and L-methionine transporter ATP-binding protein
AVR78_RS14375	90.2894	5.23067	4.1095	7.8207e-49	4.5719e-49	AVR78_RS14375	FMN-dependent monooxygenase
AVR78_RS14380	67.7171	14.2972	2.2438	3.595e-33	1.2632e-33	AVR78_RS14380	hypothetical protein
AVR78_RS14395	93.7621	11.1588	3.0708	2.91e-49	1.7209e-49	AVR78_RS14395	sigma-54-dependent Fis family transcriptional regulator
AVR78_RS14405	182.315	29.6405	2.6208	1.6179e-90	2.9579e-90	AVR78_RS14405	lactaldehyde reductase
AVR78_RS14410	38.1994	14.9946	1.3491	2.8688e-16	5.3107e-17	AVR78_RS14410	L-fuculose-phosphate aldolase
AVR78_RS14420	38.1994	12.9023	1.5659	3.627e-17	7.0082e-18	AVR78_RS14420	MFS transporter
AVR78_RS14425	123.28	14.6459	3.0734	3.2612e-64	3.1978e-64	AVR78_RS14425	L-fucose isomerase
AVR78_RS14430	100.707	10.8101	3.2197	3.0769e-53	2.1201e-53	AVR78_RS14430	L-fuculokinase
AVR78_RS14435	8.68167	1.74356	2.3159	1.5664e-05	1.8618e-06	AVR78_RS14435	L-fucose mutarotase
AVR78_RS14485	8.68167	0	4.6379	5.9247e-06	7.2003e-07	AVR78_RS14485	tRNA-Met
AVR78_RS14495	19.0997	2.44098	2.968	3.254e-11	4.9024e-12	AVR78_RS14495	tRNA-Met
AVR78_RS14500	142.379	59.9784	1.2472	1.6653e-54	1.2016e-54	AVR78_RS14500	nicotinate-nucleotide--dimethylbenzimidazole phosphoribosyltransferase
AVR78_RS14510	180.579	67.9987	1.409	6.0156e-72	7.1149e-72	AVR78_RS14510	cobyric acid synthase
AVR78_RS14530	64.2444	28.943	1.1504	8.7472e-25	2.2576e-25	AVR78_RS14530	cobalt ECF transporter S component CbiM
AVR78_RS14550	65.9807	26.1534	1.335	7.626e-27	2.13e-27	AVR78_RS14550	cobalt-precorrin-3B C(17)-methyltransferase
AVR78_RS14620	65.9807	14.9946	2.1376	7.4806e-32	2.5094e-32	pduD	propanediol dehydratase medium subunit PduD
AVR78_RS14630	111.125	38.0095	1.5478	1.307e-46	7.2003e-47	AVR78_RS14630	diol dehydratase reactivase subunit alpha
AVR78_RS14640	13.8907	3.83583	1.8565	1.5116e-07	1.959e-08	AVR78_RS14640	propanediol utilization microcompartment protein PduA
AVR78_RS14645	12.1543	2.78969	2.1233	4.7801e-07	6.0832e-08	AVR78_RS14645	BMC domain-containing protein
AVR78_RS14650	32.9904	7.32294	2.1715	8.2234e-17	1.5594e-17	AVR78_RS14650	phosphate propanoyltransferase
AVR78_RS14655	8.68167	1.39485	2.6379	1.0506e-05	1.2578e-06	AVR78_RS14655	microcompartment protein PduM
AVR78_RS14665	36.463	14.9946	1.282	2.5678e-15	4.5779e-16	AVR78_RS14665	ATP:cob(I)alamin adenosyltransferase
AVR78_RS14670	95.4984	19.1791	2.3159	1.5221e-46	8.3653e-47	AVR78_RS14670	aldehyde dehydrogenase EutE
AVR78_RS14675	32.9904	8.02036	2.0403	1.7806e-16	3.319e-17	AVR78_RS14675	propanediol utilization: propanol dehydrogenase
AVR78_RS14680	34.7267	9.0665	1.9374	5.7711e-17	1.1035e-17	AVR78_RS14680	polyhedral body protein
AVR78_RS14685	29.5177	2.44098	3.596	5.4034e-17	1.0349e-17	AVR78_RS14685	BMC domain-containing protein
AVR78_RS14690	36.463	0	5.7083	2.2976e-19	4.8388e-20	AVR78_RS14690	propanediol utilization protein PduU
AVR78_RS14695	13.8907	2.78969	2.3159	4.6728e-08	6.1691e-09	AVR78_RS14695	ethanolamine utilization protein EutP
AVR78_RS14725	24.3087	4.18454	2.5383	2.2601e-13	3.7108e-14	AVR78_RS14725	hypothetical protein
AVR78_RS14755	8.68167	1.39485	2.6379	1.0506e-05	1.2578e-06	AVR78_RS14755	hypothetical protein
AVR78_RS14760	27.7814	10.4613	1.409	1.9881e-12	3.1504e-13	AVR78_RS14760	prepilin-type cleavage/methylation domain-containing protein
AVR78_RS14765	39.9357	11.1588	1.8395	6.2093e-19	1.2847e-19	AVR78_RS14765	hypothetical protein
AVR78_RS14815	222.251	61.3732	1.8565	5.8152e-98	1.213e-97	AVR78_RS14815	MFS transporter
AVR78_RS14825	119.807	13.9485	3.1025	1.4308e-62	1.3132e-62	AVR78_RS14825	hypothetical protein
AVR78_RS14845	152.797	27.5482	2.4716	6.9177e-75	8.7453e-75	AVR78_RS14845	glycoside hydrolase family 1 protein
AVR78_RS14850	177.106	35.9173	2.3019	1.3609e-84	2.1609e-84	AVR78_RS14850	PTS sugar transporter subunit IIC
AVR78_RS14860	199.679	50.5632	1.9815	2.4358e-90	4.4356e-90	AVR78_RS14860	diaminopimelate decarboxylase
AVR78_RS14875	17.3633	5.92809	1.5504	1.4406e-08	1.9449e-09	AVR78_RS14875	cupin domain-containing protein
AVR78_RS14880	72.9261	26.5021	1.4603	1.6634e-30	5.2428e-31	AVR78_RS14880	sugar ABC transporter permease
AVR78_RS14885	34.7267	4.53325	2.9374	4.0493e-19	8.4159e-20	AVR78_RS14885	carbohydrate ABC transporter permease
AVR78_RS14890	64.2444	5.57938	3.5254	5.06e-35	1.8925e-35	AVR78_RS14890	ABC transporter ATP-binding protein
AVR78_RS14895	105.916	14.6459	2.8544	1.5283e-54	1.1045e-54	AVR78_RS14895	carbohydrate ABC transporter substrate-binding protein
AVR78_RS14905	175.37	17.4356	3.3303	7.8651e-92	1.4672e-91	AVR78_RS14905	glycosyl hydrolase family 32
AVR78_RS14910	83.3441	5.23067	3.994	3.1468e-45	1.6523e-45	AVR78_RS14910	MFS transporter
AVR78_RS14925	92.0258	8.02036	3.5203	2.0851e-49	1.2411e-49	AVR78_RS14925	MFS transporter
AVR78_RS14930	50.3537	8.36907	2.589	3.538e-26	9.6071e-27	AVR78_RS14930	2-deoxy-D-gluconate 3-dehydrogenase
AVR78_RS14935	12.1543	3.1384	1.9534	7.0791e-07	8.9518e-08	AVR78_RS14935	hypothetical protein
AVR78_RS14940	55.5627	13.5997	2.0305	1.274e-26	3.5303e-27	AVR78_RS14940	oligogalacturonide lyase
AVR78_RS14945	53.8264	26.1534	1.0413	2.6925e-20	5.8421e-21	AVR78_RS14945	oligogalacturonate porin
AVR78_RS15020	161.479	23.7124	2.7676	1.449e-81	2.1382e-81	AVR78_RS15020	EamA family transporter
AVR78_RS15045	57.2991	17.4356	1.7165	8.1506e-26	2.1809e-26	AVR78_RS15045	pili assembly chaperone protein
AVR78_RS15065	27.7814	13.5997	1.0305	3.6335e-11	5.467e-12	AVR78_RS15065	tyrosine recombinase
AVR78_RS15090	170.161	60.3271	1.496	1.7065e-69	1.9241e-69	AVR78_RS15090	outer membrane usher protein
AVR78_RS15095	26.045	9.41521	1.4679	6.5296e-12	1.0151e-12	AVR78_RS15095	type 1 fimbrial protein
AVR78_RS15110	24.3087	5.92809	2.0358	1.5843e-12	2.52e-13	AVR78_RS15110	hypothetical protein
AVR78_RS15115	76.3987	29.2918	1.3831	3.1186e-31	1.0136e-31	AVR78_RS15115	N-acetyltransferase
AVR78_RS15120	98.9711	19.1791	2.3675	1.6568e-48	9.5875e-49	AVR78_RS15120	hypothetical protein
AVR78_RS15140	85.0804	19.8766	2.0978	2.5493e-40	1.1303e-40	AVR78_RS15140	multidrug resistance transporter
AVR78_RS15155	27.7814	8.02036	1.7924	1.6248e-13	2.6849e-14	AVR78_RS15155	arsenate reductase (glutaredoxin)
AVR78_RS15160	137.17	17.0869	3.005	6.5063e-71	7.5208e-71	AVR78_RS15160	arsenical efflux pump membrane protein ArsB
AVR78_RS15165	59.0354	24.7585	1.2537	1.2329e-23	3.0435e-24	AVR78_RS15165	transcriptional regulator
AVR78_RS15200	118.071	19.8766	2.5705	5.9011e-59	4.9237e-59	AVR78_RS15200	aldo/keto reductase
AVR78_RS15205	59.0354	14.9946	1.9771	6.3466e-28	1.8375e-28	AVR78_RS15205	carboxymuconolactone decarboxylase
AVR78_RS15305	119.807	32.7789	1.8699	8.3879e-54	5.8767e-54	AVR78_RS15305	suppressor for copper-sensitivity B
AVR78_RS15310	26.045	5.57938	2.2228	1.0901e-13	1.8151e-14	AVR78_RS15310	secreted protein%2C suppressor for copper-sensitivity ScsC
AVR78_RS15315	34.7267	5.23067	2.731	8.3631e-19	1.7187e-19	AVR78_RS15315	protein disulfide oxidoreductase
AVR78_RS15320	175.37	64.5116	1.4428	1.4394e-70	1.6513e-70	AVR78_RS15320	NAD(P)-dependent oxidoreductase
AVR78_RS15400	24.3087	11.1588	1.1233	3.0982e-10	4.4936e-11	AVR78_RS15400	arginine exporter ArgO
AVR78_RS15440	12.1543	0	5.1233	1.1604e-07	1.509e-08	AVR78_RS15440	IS5/IS1182 family transposase
AVR78_RS15445	173.633	14.2972	3.6022	8.4497e-92	1.5699e-91	AVR78_RS15445	outer membrane porin%2C OprD family
AVR78_RS15450	168.424	21.6201	2.9617	2.2658e-86	3.7538e-86	AVR78_RS15450	hypothetical protein
AVR78_RS15455	97.2348	15.692	2.6314	3.4586e-49	2.04e-49	AVR78_RS15455	aldehyde dehydrogenase
AVR78_RS15460	109.389	4.88196	4.4859	2.0213e-58	1.6505e-58	AVR78_RS15460	aspartate dehydrogenase
AVR78_RS15465	29.5177	12.9023	1.1939	2.247e-12	3.5521e-13	AVR78_RS15465	short chain dehydrogenase
AVR78_RS15470	31.254	5.92809	2.3984	1.6974e-16	3.169e-17	AVR78_RS15470	alpha/beta hydrolase
AVR78_RS15475	26.045	8.02036	1.6993	1.5623e-12	2.486e-13	AVR78_RS15475	cupin domain-containing protein
AVR78_RS15480	43.4084	3.48711	3.6379	2.8549e-24	7.2423e-25	AVR78_RS15480	MFS transporter
AVR78_RS15485	138.907	35.9173	1.9514	4.5942e-63	4.2851e-63	AVR78_RS15485	ferredoxin reductase
AVR78_RS15490	62.5081	25.4559	1.296	3.0757e-25	8.0699e-26	AVR78_RS15490	glyoxalase/bleomycin resistance protein/dioxygenase
AVR78_RS15520	128.489	16.0407	3.0018	1.5822e-66	1.6653e-66	AVR78_RS15520	MFS transporter
AVR78_RS15560	72.9261	16.3894	2.1537	4.0863e-35	1.5333e-35	AVR78_RS15560	deoxyribonuclease I
AVR78_RS15595	95.4984	5.92809	4.0098	1.4486e-51	9.3497e-52	AVR78_RS15595	type IV pili twitching motility protein PilT
AVR78_RS15625	88.5531	28.2456	1.6485	2.1337e-38	8.8772e-39	AVR78_RS15625	TRAP transporter substrate-binding protein DctP
AVR78_RS15630	6.94534	2.09227	1.731	0.00024882	2.7748e-05	AVR78_RS15630	TRAP transporter small permease
AVR78_RS15635	98.9711	8.71779	3.505	5.6256e-53	3.8416e-53	AVR78_RS15635	TRAP transporter permease DctM
AVR78_RS15675	265.659	65.9065	2.0111	3.4001e-120	9.6912e-120	AVR78_RS15675	ornithine decarboxylase
AVR78_RS15680	5.209	1.39485	1.9009	0.0012377	0.00013271	AVR78_RS15680	hypothetical protein
AVR78_RS15705	53.8264	18.8304	1.5152	2.9245e-23	7.045e-24	AVR78_RS15705	PLP-dependent transferase
AVR78_RS15710	130.225	45.6812	1.5113	8.0301e-54	5.6346e-54	AVR78_RS15710	LysR family transcriptional regulator
AVR78_RS15715	24.3087	4.18454	2.5383	2.2601e-13	3.7108e-14	AVR78_RS15715	short chain dehydrogenase
AVR78_RS15725	43.4084	20.2253	1.1018	5.3286e-17	1.0219e-17	AVR78_RS15725	hypothetical protein
AVR78_RS15760	187.524	65.5577	1.5162	8.5591e-77	1.1095e-76	AVR78_RS15760	dienelactone hydrolase family protein
AVR78_RS15765	81.6077	29.6405	1.4611	6.0644e-34	2.1844e-34	AVR78_RS15765	membrane protein
AVR78_RS15785	74.6624	29.9892	1.3159	5.377e-30	1.6661e-30	AVR78_RS15785	cystathionine beta-lyase
AVR78_RS15835	81.6077	11.8562	2.7831	3.573e-42	1.7009e-42	AVR78_RS15835	TIGR00156 family protein
AVR78_RS15840	85.0804	39.7531	1.0978	9.7473e-32	3.2531e-32	AVR78_RS15840	two-component system response regulator QseB
AVR78_RS15845	67.7171	25.1072	1.4314	3.1132e-28	9.0881e-29	AVR78_RS15845	two-component system sensor histidine kinase QseC
AVR78_RS15850	83.3441	21.9688	1.9236	2.3712e-38	9.8473e-39	AVR78_RS15850	flavodoxin family protein
AVR78_RS15925	26.045	11.5075	1.1784	4.8445e-11	7.251e-12	AVR78_RS15925	hypothetical protein
AVR78_RS15960	130.225	55.7938	1.2228	1.2445e-49	7.5345e-50	folB	bifunctional dihydroneopterin aldolase/7%2C8-dihydroneopterin epimerase
AVR78_RS15975	83.3441	4.18454	4.3159	4.2095e-45	2.1902e-45	AVR78_RS15975	hypothetical protein
AVR78_RS15980	39.9357	14.9946	1.4132	3.1718e-17	6.139e-18	AVR78_RS15980	urease accessory protein
AVR78_RS15995	116.334	32.4302	1.8429	5.1229e-52	3.3441e-52	AVR78_RS15995	urease subunit alpha
AVR78_RS16000	13.8907	3.48711	1.994	1.0273e-07	1.3386e-08	AVR78_RS16000	urease accessory protein UreE
AVR78_RS16015	130.225	34.8711	1.9009	1.1217e-58	9.2248e-59	AVR78_RS16015	cytosine/purines uracil thiamine allantoin permease
AVR78_RS16025	3.47267	1.04613	1.731	0.0095846	0.00097938	AVR78_RS16025	hypothetical protein
AVR78_RS16050	15.627	2.09227	2.9009	2.158e-09	3.022e-10	AVR78_RS16050	tRNA-Met
AVR78_RS16090	36.463	3.48711	3.3863	1.7186e-20	3.752e-21	AVR78_RS16090	acid-resistance membrane protein
AVR78_RS16095	6.94534	0	3.796	4.6705e-05	5.4344e-06	AVR78_RS16095	acid-resistance protein
AVR78_RS16105	163.215	38.707	2.0761	1.995e-75	2.5644e-75	AVR78_RS16105	sigma-54-dependent Fis family transcriptional regulator
AVR78_RS16110	178.842	81.9472	1.1259	2.0947e-65	2.122e-65	gldA	glycerol dehydrogenase
AVR78_RS16140	128.489	28.5943	2.1678	1.1512e-60	1.0062e-60	AVR78_RS16140	glycerone kinase
AVR78_RS16220	137.17	43.5889	1.6539	1.3942e-58	1.1425e-58	AVR78_RS16220	hypothetical protein
AVR78_RS16250	50.3537	15.692	1.6821	1.026e-22	2.4295e-23	AVR78_RS16250	YgjV family protein
AVR78_RS16255	178.842	52.3067	1.7736	7.3705e-78	9.8039e-78	AVR78_RS16255	altronate dehydratase
AVR78_RS16260	137.17	58.2348	1.236	2.1387e-52	1.4203e-52	AVR78_RS16260	glucuronate isomerase
AVR78_RS16305	45.1447	16.0407	1.4928	1.1697e-19	2.484e-20	AVR78_RS16305	DoxX family protein
AVR78_RS16340	60.7717	17.0869	1.8305	6.3418e-28	1.8373e-28	AVR78_RS16340	OB-fold putative lipoprotein
AVR78_RS16350	138.907	67.9987	1.0305	1.4748e-49	8.8815e-50	AVR78_RS16350	2-hydroxy-3-oxopropionate reductase
AVR78_RS16360	189.261	42.8915	2.1416	4.1354e-88	7.1614e-88	AVR78_RS16360	galactarate dehydratase
AVR78_RS16380	71.1897	20.2253	1.8155	2.5e-32	8.517e-33	AVR78_RS16380	tagatose bisphosphate family class II aldolase
AVR78_RS16390	72.9261	26.5021	1.4603	1.6634e-30	5.2428e-31	AVR78_RS16390	PTS fructose subfamily%2C IIC subunit
AVR78_RS16395	76.3987	7.67165	3.3159	5.286e-41	2.3949e-41	AVR78_RS16395	HPr family phosphocarrier protein
AVR78_RS16400	52.09	10.1126	2.3648	2.5106e-26	6.8906e-27	AVR78_RS16400	tagatose-bisphosphate aldolase subunit GatZ
AVR78_RS16405	10.418	1.04613	3.3159	7.3489e-07	9.2828e-08	AVR78_RS16405	PTS galactitol transporter subunit IIA
AVR78_RS16415	156.27	38.3583	2.0264	1.11e-71	1.3061e-71	AVR78_RS16415	PTS galactitol transporter subunit IIC
AVR78_RS16420	52.09	3.83583	3.7634	7.3298e-29	2.1899e-29	AVR78_RS16420	galactitol-1-phosphate 5-dehydrogenase
AVR78_RS16505	135.434	36.6147	1.8871	8.6651e-61	7.5886e-61	AVR78_RS16505	tryptophan permease
AVR78_RS16525	20.836	1.04613	4.3159	1.8372e-12	2.9132e-13	AVR78_RS16525	hypothetical protein
AVR78_RS16560	59.0354	12.9023	2.1939	6.3716e-29	1.9048e-29	AVR78_RS16560	tRNA-Met
AVR78_RS16580	72.9261	9.0665	3.0078	1.5231e-38	6.3598e-39	AVR78_RS16580	outer membrane protein
AVR78_RS16665	38.1994	12.2049	1.6461	1.7742e-17	3.4601e-18	AVR78_RS16665	regulatory factor of maltose metabolism
AVR78_RS16760	177.106	70.091	1.3373	3.4627e-69	3.8569e-69	AVR78_RS16760	monofunctional biosynthetic peptidoglycan transglycosylase
AVR78_RS16780	90.2894	16.0407	2.4928	4.1873e-45	2.1811e-45	AVR78_RS16780	Zn-dependent oxidoreductase
AVR78_RS16790	197.942	33.4763	2.5639	1.6754e-97	3.4324e-97	AVR78_RS16790	TIGR01212 family radical SAM protein
AVR78_RS16805	104.18	39.4044	1.4027	3.4061e-42	1.6231e-42	AVR78_RS16805	glutamate synthase subunit beta
AVR78_RS16810	53.8264	21.6201	1.3159	4.4243e-22	1.0213e-22	AVR78_RS16810	YhcH/YjgK/YiaL family protein
AVR78_RS16815	65.9807	15.3433	2.1044	1.0984e-31	3.65e-32	AVR78_RS16815	N-acetylmannosamine kinase
AVR78_RS16820	48.6174	9.76392	2.3159	1.5963e-24	4.0901e-25	AVR78_RS16820	putative N-acetylmannosamine-6-phosphate 2-epimerase
AVR78_RS16825	232.669	64.5116	1.8506	2.4186e-102	5.4407e-102	AVR78_RS16825	MFS transporter
AVR78_RS16850	43.4084	2.78969	3.9598	2.3115e-24	5.8866e-25	AVR78_RS16850	hypothetical protein
AVR78_RS16965	53.8264	3.83583	3.8107	8.7289e-30	2.6848e-30	AVR78_RS16965	hypothetical protein
AVR78_RS16975	36.463	8.36907	2.1233	2.7621e-18	5.5593e-19	AVR78_RS16975	hypothetical protein
AVR78_RS17020	3.47267	0	3.3159	0.00425	0.00044236	AVR78_RS17020	hypothetical protein
AVR78_RS17035	62.5081	8.02036	2.9623	3.556e-33	1.2505e-33	AVR78_RS17035	acrEF/envCD operon transcriptional regulator
AVR78_RS17045	182.315	19.8766	3.1973	9.156e-95	1.7956e-94	AVR78_RS17045	multidrug efflux RND transporter permease subunit
AVR78_RS17050	34.7267	5.23067	2.731	8.3631e-19	1.7187e-19	AVR78_RS17050	membrane protein
AVR78_RS17055	24.3087	0	6.1233	5.3385e-13	8.6231e-14	rrf	5S ribosomal RNA
AVR78_RS17140	74.6624	12.5536	2.5723	6.1572e-38	2.5228e-38	AVR78_RS17140	ribosome alternative rescue factor ArfA
AVR78_RS17295	140.643	4.18454	5.0708	7.3319e-73	8.8079e-73	AVR78_RS17295	prepilin peptidase
AVR78_RS17385	29.5177	4.18454	2.8184	2.4573e-16	4.5599e-17	AVR78_RS17385	hypothetical protein
AVR78_RS17455	248.296	87.8753	1.4985	1.3212e-100	2.9432e-100	AVR78_RS17455	cytosine deaminase
AVR78_RS17515	156.27	14.9946	3.3815	3.247e-82	4.9339e-82	AVR78_RS17515	DNA transporter HofQ
AVR78_RS17520	13.8907	1.39485	3.3159	1.078e-08	1.461e-09	AVR78_RS17520	DUF2531 domain-containing protein
AVR78_RS17525	24.3087	9.0665	1.4229	4.29e-11	6.4379e-12	AVR78_RS17525	hypothetical protein
AVR78_RS17535	85.0804	33.4763	1.3457	3.1086e-34	1.1313e-34	AVR78_RS17535	hypothetical protein
AVR78_RS17610	31.254	10.8101	1.5317	3.2787e-14	5.612e-15	AVR78_RS17610	ferrous iron transporter C
AVR78_RS17620	135.434	36.266	1.9009	5.9644e-61	5.2568e-61	AVR78_RS17620	pimeloyl-[acyl-carrier protein] methyl ester esterase
AVR78_RS17625	36.463	6.27681	2.5383	2.6982e-19	5.6514e-20	AVR78_RS17625	DNA utilization protein GntX
AVR78_RS17705	76.3987	9.0665	3.0749	1.7816e-40	7.9222e-41	AVR78_RS17705	hypothetical protein
AVR78_RS17710	107.653	36.9634	1.5422	3.7972e-45	1.9824e-45	AVR78_RS17710	gluconate transporter
AVR78_RS17725	130.225	48.8196	1.4155	1.7458e-52	1.1644e-52	AVR78_RS17725	pirin family protein
AVR78_RS17735	78.1351	10.1126	2.9498	5.2866e-41	2.3949e-41	AVR78_RS17735	hypothetical protein
AVR78_RS17740	34.7267	12.9023	1.4284	3.0925e-15	5.4858e-16	AVR78_RS17740	hypothetical protein
AVR78_RS17765	164.952	54.399	1.6004	3.3755e-69	3.7781e-69	ugpC	sn-glycerol-3-phosphate import ATP-binding protein UgpC
AVR78_RS17785	53.8264	5.92809	3.1827	3.359e-29	1.0075e-29	livF	high-affinity branched-chain amino acid ABC transporter ATP-binding protein LivF
AVR78_RS17790	31.254	3.1384	3.3159	9.7393e-18	1.9207e-18	livG	ABC transporter ATP-binding protein
AVR78_RS17795	53.8264	18.133	1.5697	1.4493e-23	3.5662e-24	livM	high-affinity branched-chain amino acid ABC transporter permease LivM
AVR78_RS17800	39.9357	19.8766	1.0066	2.7883e-15	4.9633e-16	AVR78_RS17800	high-affinity branched-chain amino acid ABC transporter permease LivH
AVR78_RS17815	41.672	6.97423	2.579	6.3963e-22	1.4706e-22	AVR78_RS17815	DUF4753 domain-containing protein
AVR78_RS17830	125.016	17.0869	2.8712	3.8693e-64	3.7699e-64	AVR78_RS17830	tyrosine-specific transporter
AVR78_RS17835	102.444	44.6351	1.1986	4.0196e-39	1.7112e-39	AVR78_RS17835	4-aminobutyrate--2-oxoglutarate transaminase
AVR78_RS17840	138.907	55.7938	1.3159	2.5449e-54	1.8191e-54	AVR78_RS17840	PLP-dependent aminotransferase family protein
AVR78_RS17905	164.952	56.1425	1.5549	1.9583e-68	2.1602e-68	AVR78_RS17905	MFS transporter
AVR78_RS17910	133.698	40.4505	1.7247	4.656e-58	3.7419e-58	AVR78_RS17910	PerM-family permease
AVR78_RS17915	17.3633	4.53325	1.9374	3.2524e-09	4.516e-10	AVR78_RS17915	hypothetical protein
AVR78_RS17925	187.524	28.943	2.6958	9.0737e-94	1.7496e-93	AVR78_RS17925	lipid IV(A) 4-amino-4-deoxy-L-arabinosyltransferase
AVR78_RS17930	83.3441	12.9023	2.6914	1.1432e-42	5.5631e-43	AVR78_RS17930	4-deoxy-4-formamido-L-arabinose-phosphoundecaprenol deformylase
AVR78_RS17935	133.698	57.5374	1.2164	8.3274e-51	5.1781e-51	AVR78_RS17935	bifunctional UDP-4-amino-4-deoxy-L-arabinose formyltransferase/UDP-glucuronic acid oxidase ArnA
AVR78_RS17960	72.9261	24.7585	1.5585	2.9304e-31	9.544e-32	AVR78_RS17960	nickel ABC transporter%2C nickel/metallophore periplasmic binding protein
AVR78_RS17970	116.334	14.9946	2.9558	3.3072e-60	2.8582e-60	AVR78_RS17970	nickel ABC transporter permease subunit NikC
AVR78_RS17980	24.3087	8.71779	1.4794	3.032e-11	4.5754e-12	AVR78_RS17980	nickel import ATP-binding protein NikE
AVR78_RS17985	31.254	6.27681	2.3159	2.5054e-16	4.6472e-17	AVR78_RS17985	nickel-responsive transcriptional regulator NikR
AVR78_RS17995	3.47267	1.39485	1.3159	0.014135	0.0014291	AVR78_RS17995	IS110 family transposase
AVR78_RS18005	81.6077	6.62552	3.6226	3.9114e-44	1.9746e-44	AVR78_RS18005	magnesium transporter
AVR78_RS18010	83.3441	28.943	1.5259	3.3501e-35	1.2632e-35	AVR78_RS18010	LysR family transcriptional regulator
AVR78_RS18015	86.8167	19.5278	2.1524	1.8139e-41	8.3827e-42	AVR78_RS18015	hydroxyacid dehydrogenase
AVR78_RS18020	29.5177	3.1384	3.2335	8.9273e-17	1.6845e-17	AVR78_RS18020	dimethylmenaquinone methyltransferase
AVR78_RS18025	59.0354	20.574	1.5208	2.1767e-25	5.7376e-26	AVR78_RS18025	anion transporter
AVR78_RS18075	121.543	15.692	2.9534	8.2527e-63	7.6354e-63	AVR78_RS18075	phosphatase PAP2 family protein
AVR78_RS18090	78.1351	35.5686	1.1354	1.2069e-29	3.6824e-30	AVR78_RS18090	glutathione S-transferase
AVR78_RS18110	234.405	24.7585	3.243	1.3999e-121	4.0658e-121	AVR78_RS18110	oxidoreductase
AVR78_RS18115	79.8714	18.8304	2.0846	7.0902e-38	2.8973e-38	AVR78_RS18115	LysR family transcriptional regulator
AVR78_RS18135	10.418	0	4.9009	8.0232e-07	1.0121e-07	AVR78_RS18135	antibiotic biosynthesis monooxygenase
AVR78_RS18280	41.672	6.27681	2.731	3.0074e-22	7.002e-23	AVR78_RS18280	hypothetical protein
AVR78_RS18295	185.788	32.0815	2.5338	2.5477e-91	4.6765e-91	AVR78_RS18295	hypothetical protein
AVR78_RS18305	76.3987	37.3121	1.0339	4.6558e-28	1.3523e-28	AVR78_RS18305	oxalate/formate antiport family MFS transporter
AVR78_RS18315	158.006	71.4858	1.1443	2.3775e-58	1.9276e-58	AVR78_RS18315	DNA-3-methyladenine glycosylase I
AVR78_RS18325	319.486	97.9879	1.7051	1.6166e-135	5.6202e-135	AVR78_RS18325	molybdopterin guanine dinucleotide-containing S/N-oxide reductase
AVR78_RS18350	229.196	55.7938	2.0384	1.812e-104	4.1997e-104	AVR78_RS18350	MFS transporter
AVR78_RS18380	189.261	48.4709	1.9652	1.808e-85	2.901e-85	AVR78_RS18380	ABC transporter ATP-binding protein
AVR78_RS18385	38.1994	4.18454	3.1904	3.3354e-21	7.4884e-22	AVR78_RS18385	type I toxin-antitoxin system hok family toxin
AVR78_RS18405	86.8167	42.1941	1.0409	9.8184e-32	3.2745e-32	AVR78_RS18405	O-acetyltransferase
AVR78_RS18410	83.3441	9.76392	3.0935	4.7692e-44	2.3998e-44	AVR78_RS18410	hypothetical protein
AVR78_RS18415	145.852	45.3325	1.6859	1.253e-62	1.1523e-62	AVR78_RS18415	xylulokinase
AVR78_RS18420	168.424	44.6351	1.9159	1.4498e-75	1.8742e-75	AVR78_RS18420	xylose isomerase
AVR78_RS18425	53.8264	5.92809	3.1827	3.359e-29	1.0075e-29	AVR78_RS18425	hypothetical protein
AVR78_RS18435	93.7621	18.8304	2.3159	9.9228e-46	5.3011e-46	AVR78_RS18435	xylose ABC transporter ATP-binding protein
AVR78_RS18440	104.18	9.0665	3.5224	1.0637e-55	7.9632e-56	AVR78_RS18440	sugar ABC transporter permease
AVR78_RS18460	295.177	38.707	2.9309	1.4879e-149	6.2644e-149	AVR78_RS18460	alpha-amylase
AVR78_RS18465	168.424	64.8603	1.3767	1.2542e-66	1.3261e-66	AVR78_RS18465	valine--pyruvate transaminase
AVR78_RS18480	60.7717	9.41521	2.6903	1.425e-31	4.7078e-32	AVR78_RS18480	MFS transporter
AVR78_RS18490	218.778	100.778	1.1183	2.1581e-79	3.0103e-79	AVR78_RS18490	selenocysteinyl-tRNA-specific translation elongation factor SelB
AVR78_RS18505	128.489	24.0611	2.4169	7.7198e-63	7.1713e-63	AVR78_RS18505	HlyD family secretion protein
AVR78_RS18555	111.125	35.2199	1.6577	7.6908e-48	4.3788e-48	AVR78_RS18555	tRNA (uridine(34)/cytosine(34)/5-carboxymethylaminomethyluridine(34)-2'-O)-methyltransferase TrmL
AVR78_RS18730	10.418	0	4.381	6.3819e-07	8.0813e-08	AVR78_RS18730	hypothetical protein
AVR78_RS18740	204.888	61.3732	1.7392	2.8958e-88	5.0529e-88	AVR78_RS18740	hypothetical protein
AVR78_RS18745	57.2991	26.1534	1.1315	3.7915e-22	8.7743e-23	AVR78_RS18745	trimeric intracellular cation channel family protein
AVR78_RS18750	307.331	68.3474	2.1688	1.7406e-142	6.6564e-142	AVR78_RS18750	NAD-dependent DNA ligase LigB
AVR78_RS18790	131.961	46.0299	1.5195	1.255e-54	9.098e-55	AVR78_RS18790	DUF805 domain-containing protein
AVR78_RS18805	175.37	56.4913	1.6343	4.8034e-74	5.9575e-74	AVR78_RS18805	sodium:sulfate symporter
AVR78_RS18855	131.961	28.943	2.1888	1.8534e-62	1.6943e-62	AVR78_RS18855	PTS glucose-like transporter subunit IIB
AVR78_RS18870	159.743	14.6459	3.4472	3.2786e-84	5.1703e-84	AVR78_RS18870	alpha-xylosidase
AVR78_RS18875	59.0354	10.4613	2.4965	4.2642e-30	1.3249e-30	AVR78_RS18875	glycoside-pentoside-hexuronide family transporter
AVR78_RS18885	39.9357	15.692	1.3476	6.2326e-17	1.1892e-17	AVR78_RS18885	DUF3237 domain-containing protein
AVR78_RS18890	39.9357	18.133	1.1391	6.0236e-16	1.0981e-16	AVR78_RS18890	zinc-binding alcohol dehydrogenase family protein
AVR78_RS18895	8.68167	1.39485	2.6379	1.0506e-05	1.2578e-06	AVR78_RS18895	antibiotic biosynthesis monooxygenase
AVR78_RS18905	125.016	19.1791	2.7045	3.4397e-63	3.2412e-63	AVR78_RS18905	AraC family transcriptional regulator
AVR78_RS18910	60.7717	16.3894	1.8906	3.006e-28	8.7975e-29	AVR78_RS18910	MBL fold metallo-hydrolase
AVR78_RS18915	243.087	64.8603	1.9061	5.1389e-108	1.2887e-107	AVR78_RS18915	NUDIX hydrolase
AVR78_RS18920	98.9711	16.3894	2.5942	7.7372e-50	4.7153e-50	AVR78_RS18920	drug/metabolite transporter permease
AVR78_RS18925	164.952	35.2199	2.2276	4.5404e-78	6.1103e-78	AVR78_RS18925	lipoprotein NlpA
AVR78_RS18930	114.598	33.1276	1.7905	1.0059e-50	6.2466e-51	AVR78_RS18930	AraC family transcriptional regulator
AVR78_RS18935	27.7814	5.92809	2.2285	1.635e-14	2.8261e-15	AVR78_RS18935	macrophage infectivity potentiator-like protein
AVR78_RS18995	154.534	60.3271	1.357	6.039e-61	5.309e-61	AVR78_RS18995	multidrug efflux RND transporter permease subunit
AVR78_RS19000	71.1897	9.76392	2.8661	2.854e-37	1.1509e-37	AVR78_RS19000	RND transporter NodT
AVR78_RS19005	43.4084	5.57938	2.9598	1.5402e-23	3.7856e-24	AVR78_RS19005	Bcr/CflA family drug resistance efflux transporter
AVR78_RS19010	131.961	50.5632	1.384	1.0564e-52	7.1608e-53	AVR78_RS19010	N-acetylmuramic acid 6-phosphate etherase
AVR78_RS19015	133.698	49.517	1.433	4.3182e-54	3.0581e-54	AVR78_RS19015	PTS N-acetylmuramic acid transporter subunits IIBC
AVR78_RS19030	170.161	12.9023	3.7212	3.1543e-90	5.7214e-90	AVR78_RS19030	NAD(P)-dependent oxidoreductase
AVR78_RS19035	46.881	8.71779	2.427	4.8374e-24	1.215e-24	AVR78_RS19035	4-oxalomesaconate tautomerase
AVR78_RS19040	71.1897	6.27681	3.5036	1.3455e-38	5.6233e-39	AVR78_RS19040	4-carboxy-4-hydroxy-2-oxoadipate aldolase/oxaloacetate decarboxylase
AVR78_RS19055	144.116	21.2714	2.7602	6.0199e-73	7.2699e-73	AVR78_RS19055	protocatechuate 4%2C5-dioxygenase
AVR78_RS19060	130.225	31.384	2.0529	2.574e-60	2.2287e-60	AVR78_RS19060	MFS transporter
AVR78_RS19080	26.045	6.62552	1.9749	3.4824e-13	5.6831e-14	AVR78_RS19080	PTS lactose/cellobiose transporter subunit IIA
AVR78_RS19095	86.8167	8.71779	3.3159	2.3477e-46	1.2826e-46	AVR78_RS19095	2-aminoethylphosphonate ABC transport system%2C membrane component PhnV
AVR78_RS19100	15.627	6.27681	1.3159	1.9366e-07	2.4991e-08	AVR78_RS19100	2-aminoethylphosphonate ABC transporter permease subunit
AVR78_RS19105	72.9261	8.71779	3.0644	1.091e-38	4.585e-39	AVR78_RS19105	2-aminoethylphosphonate ABC transport system ATP-binding subunit PhnT
AVR78_RS19110	53.8264	8.36907	2.6852	3.8499e-28	1.1203e-28	AVR78_RS19110	2-aminoethylphosphonate ABC transporter substrate-binding protein
AVR78_RS19120	5.209	0	3.9009	0.00041908	4.6141e-05	AVR78_RS19120	hypothetical protein
AVR78_RS19125	88.5531	25.4559	1.7985	1.1648e-39	5.0285e-40	AVR78_RS19125	2-aminoethylphosphonate--pyruvate transaminase
AVR78_RS19130	88.5531	5.57938	3.9884	6.0482e-48	3.4607e-48	AVR78_RS19130	phosphonoacetaldehyde hydrolase
AVR78_RS19135	135.434	63.1168	1.1015	1.459e-49	8.798e-50	nepI	purine ribonucleoside efflux pump NepI
AVR78_RS19155	71.1897	6.27681	3.5036	1.3455e-38	5.6233e-39	AVR78_RS19155	hexose-6-phosphate:phosphate antiporter
AVR78_RS19160	144.116	16.3894	3.1364	4.7982e-75	6.1164e-75	AVR78_RS19160	MFS transporter family glucose-6-phosphate receptor UhpC
AVR78_RS19165	100.707	19.1791	2.3926	1.7296e-49	1.0375e-49	AVR78_RS19165	signal transduction histidine-protein kinase/phosphatase UhpB
AVR78_RS19175	31.254	11.5075	1.4415	6.5838e-14	1.112e-14	AVR78_RS19175	acetolactate synthase isozyme 1 small subunit
AVR78_RS19220	128.489	36.6147	1.8111	6.7544e-57	5.2182e-57	AVR78_RS19220	DNA-binding transcriptional regulator DsdC
AVR78_RS19230	90.2894	20.574	2.1337	6.2577e-43	3.0779e-43	AVR78_RS19230	D-serine transporter DsdX
AVR78_RS19235	116.334	38.3583	1.6007	2.4351e-49	1.4456e-49	AVR78_RS19235	D-serine ammonia-lyase
AVR78_RS19245	12.1543	0	5.1233	1.1604e-07	1.509e-08	AVR78_RS19245	DUF202 domain-containing protein
AVR78_RS19255	159.743	57.8861	1.4645	8.1233e-65	8.034e-65	AVR78_RS19255	6-phospho-alpha-glucosidase
AVR78_RS19260	206.624	30.6866	2.7513	1.1204e-103	2.5707e-103	AVR78_RS19260	PTS alpha-glucoside transporter subunit IICB
AVR78_RS19265	145.852	43.5889	1.7425	2.049e-63	1.9589e-63	AVR78_RS19265	GntR family transcriptional regulator
AVR78_RS19290	177.106	72.8807	1.281	4.7515e-68	5.2165e-68	AVR78_RS19290	DUF3748 domain-containing protein
AVR78_RS19385	8.68167	1.04613	3.0529	7.2349e-06	8.7556e-07	AVR78_RS19385	hypothetical protein
AVR78_RS19405	5.209	0	3.381	0.00045396	4.9958e-05	AVR78_RS19405	hypothetical protein
AVR78_RS19410	65.9807	25.4559	1.374	3.9138e-27	1.1053e-27	AVR78_RS19410	phosphate transport system regulator PhoU
AVR78_RS19420	64.2444	29.6405	1.116	1.6303e-24	4.1726e-25	AVR78_RS19420	phosphate transporter permease subunit PtsA
AVR78_RS19530	145.852	52.3067	1.4794	1.4263e-59	1.2032e-59	AVR78_RS19530	ATPase RavA stimulator ViaA
AVR78_RS19610	5.209	0	2.9009	0.00054889	6.0101e-05	rrf	5S ribosomal RNA
AVR78_RS19615	81.6077	23.7124	1.7831	1.4384e-36	5.6756e-37	AVR78_RS19615	molybdopterin-guanine dinucleotide biosynthesis protein B
AVR78_RS19695	24.3087	2.78969	3.1233	5.2793e-14	8.9531e-15	AVR78_RS19695	hypothetical protein
AVR78_RS19755	15.627	1.74356	3.1639	1.5348e-09	2.1631e-10	AVR78_RS19755	hypothetical protein
AVR78_RS19770	196.206	25.4559	2.9463	3.4662e-100	7.5031e-100	AVR78_RS19770	phosphofructokinase
AVR78_RS19780	175.37	15.3433	3.5147	1.7998e-92	3.3849e-92	AVR78_RS19780	PTS beta-glucoside transporter subunit IIBC
AVR78_RS19800	86.8167	10.4613	3.0529	1.0833e-45	5.7807e-46	AVR78_RS19800	hypothetical protein
AVR78_RS19805	20.836	5.23067	1.994	7.1307e-11	1.0617e-11	AVR78_RS19805	AzlD domain-containing protein
AVR78_RS19810	65.9807	24.7585	1.4141	1.9937e-27	5.6617e-28	AVR78_RS19810	branched-chain amino acid ABC transporter permease
AVR78_RS19825	248.296	23.7124	3.3883	1.5792e-129	5.1033e-129	AVR78_RS19825	alpha-galactosidase
AVR78_RS19830	109.389	14.9946	2.867	2.4925e-56	1.9e-56	lacY	MFS transporter
AVR78_RS19840	27.7814	3.1384	3.146	8.2824e-16	1.5011e-16	AVR78_RS19840	L-rhamnose mutarotase
AVR78_RS19845	46.881	19.1791	1.2895	2.7131e-19	5.6799e-20	AVR78_RS19845	lactaldehyde reductase
AVR78_RS19850	76.3987	9.0665	3.0749	1.7816e-40	7.9222e-41	AVR78_RS19850	ABC transporter permease
AVR78_RS19855	45.1447	8.02036	2.4928	2.1636e-23	5.2422e-24	AVR78_RS19855	ABC transporter permease
AVR78_RS19860	100.707	17.7843	2.5015	3.7212e-50	2.2799e-50	AVR78_RS19860	sugar ABC transporter ATP-binding protein
AVR78_RS19865	64.2444	13.9485	2.2035	2.266e-31	7.4012e-32	AVR78_RS19865	rhamnose ABC transporter substrate-binding protein
AVR78_RS19870	48.6174	7.67165	2.6639	1.5932e-25	4.2163e-26	AVR78_RS19870	rhamnulose-1-phosphate aldolase
AVR78_RS19875	53.8264	13.5997	1.9847	1.2231e-25	3.2537e-26	AVR78_RS19875	L-rhamnose isomerase
AVR78_RS19880	65.9807	8.71779	2.92	8.1524e-35	3.0293e-35	AVR78_RS19880	rhamnulokinase
AVR78_RS19885	55.5627	5.23067	3.409	2.1213e-30	6.6586e-31	AVR78_RS19885	hypothetical protein
AVR78_RS19890	131.961	37.6608	1.809	2.3267e-58	1.8898e-58	AVR78_RS19890	HTH-type transcriptional activator RhaS
AVR78_RS19900	164.952	62.4193	1.402	9.4098e-66	9.5959e-66	AVR78_RS19900	L-rhamnose/proton symporter RhaT
AVR78_RS20030	114.598	49.1683	1.2208	7.3585e-44	3.6785e-44	AVR78_RS20030	metal-binding protein ZinT
AVR78_RS20055	6.94534	0	4.3159	4.738e-05	5.5059e-06	AVR78_RS20055	hypothetical protein
AVR78_RS20135	3.47267	1.04613	1.731	0.0095846	0.00097938	AVR78_RS20135	tRNA-Trp
AVR78_RS20150	119.807	8.36907	3.8395	3.5049e-64	3.4294e-64	AVR78_RS20150	ATP-dependent protease
AVR78_RS20160	36.463	6.27681	2.5383	2.6982e-19	5.6514e-20	AVR78_RS20160	IlvGMEDA operon leader peptide
AVR78_RS20165	164.952	63.1168	1.3859	1.841e-65	1.8691e-65	AVR78_RS20165	acetolactate synthase 2 catalytic subunit
AVR78_RS20190	166.688	53.3528	1.6435	1.2689e-70	1.4594e-70	AVR78_RS20190	HTH-type transcriptional activator IlvY
AVR78_RS20205	104.18	21.2714	2.2921	1.9056e-50	1.1754e-50	AVR78_RS20205	peptidyl-prolyl cis-trans isomerase
AVR78_RS20220	29.5177	1.04613	4.8184	8.6534e-17	1.6362e-17	AVR78_RS20220	addiction module toxin RelE
AVR78_RS20235	48.6174	9.76392	2.3159	1.5963e-24	4.0901e-25	AVR78_RS20235	hypothetical protein
AVR78_RS20290	78.1351	28.2456	1.4679	1.2535e-32	4.3317e-33	AVR78_RS20290	TDP-N-acetylfucosamine:lipid II N-acetylfucosaminyltransferase
AVR78_RS20300	156.27	48.8196	1.6785	7.365e-67	7.8418e-67	AVR78_RS20300	lipopolysaccharide N-acetylmannosaminouronosyltransferase
AVR78_RS20310	3.47267	0	3.3159	0.00425	0.00044236	AVR78_RS20310	tRNA-Arg
AVR78_RS20455	133.698	41.4967	1.6879	1.3782e-57	1.0923e-57	AVR78_RS20455	EamA family transporter
AVR78_RS20465	267.396	126.234	1.0829	1.8928e-95	3.7931e-95	AVR78_RS20465	5-methyltetrahydropteroyltriglutamate--homocysteine S-methyltransferase
AVR78_RS20515	149.325	58.5835	1.3499	7.8318e-59	6.5228e-59	AVR78_RS20515	3'-5' ssDNA/RNA exonuclease TatD
AVR78_RS20550	41.672	3.1384	3.731	2.095e-23	5.0977e-24	AVR78_RS20550	hypothetical protein
AVR78_RS20600	24.3087	0	6.1233	5.3385e-13	8.6231e-14	rrf	5S ribosomal RNA
AVR78_RS20610	316.013	75.3217	2.0688	4.6818e-144	1.8208e-143	AVR78_RS20610	bifunctional biotin--[acetyl-CoA-carboxylase] ligase/biotin operon repressor BirA
AVR78_RS20620	19.0997	4.88196	1.968	4.8065e-10	6.8971e-11	AVR78_RS20620	tRNA-Thr
AVR78_RS20625	6.94534	2.09227	1.731	0.00024882	2.7748e-05	AVR78_RS20625	tRNA-Tyr
AVR78_RS20720	126.752	10.8101	3.5516	1.9791e-67	2.1319e-67	AVR78_RS20720	2-iminoacetate synthase ThiH
AVR78_RS20725	29.5177	8.36907	1.8184	2.4472e-14	4.1998e-15	AVR78_RS20725	thiazole synthase
AVR78_RS20735	17.3633	6.27681	1.4679	2.0545e-08	2.7487e-09	AVR78_RS20735	thiazole biosynthesis adenylyltransferase ThiF
AVR78_RS20740	17.3633	5.23067	1.731	6.9355e-09	9.5177e-10	AVR78_RS20740	thiamine phosphate synthase
AVR78_RS20785	81.6077	9.41521	3.1156	3.1726e-43	1.5672e-43	zraP	zinc resistance-associated protein ZraP
AVR78_RS20900	95.4984	36.266	1.3969	9.2235e-39	3.8868e-39	AVR78_RS20900	XRE family transcriptional regulator
AVR78_RS20905	43.4084	4.53325	3.2594	5.8627e-24	1.467e-24	AVR78_RS20905	bile acid:sodium symporter
AVR78_RS20925	67.7171	9.76392	2.794	2.5365e-35	9.6121e-36	AVR78_RS20925	hypothetical protein
AVR78_RS20935	29.5177	3.48711	3.0815	1.2224e-16	2.2953e-17	AVR78_RS20935	hypothetical protein
AVR78_RS20945	118.071	24.4098	2.2741	8.6774e-57	6.6702e-57	AVR78_RS20945	N-acetyltransferase
AVR78_RS20955	26.045	12.5536	1.0529	1.2404e-10	1.828e-11	AVR78_RS20955	reactive intermediate/imine deaminase
AVR78_RS20975	53.8264	23.015	1.2257	1.6295e-21	3.7055e-22	AVR78_RS20975	phosphate-starvation-inducible protein PsiE
AVR78_RS20985	48.6174	11.1588	2.1233	7.5009e-24	1.8697e-24	AVR78_RS20985	L-asparaginase
AVR78_RS21000	45.1447	1.74356	4.6945	5.8798e-25	1.5253e-25	AVR78_RS21000	chemotaxis protein CheW
AVR78_RS21025	130.225	51.2606	1.3451	1.8158e-51	1.1638e-51	AVR78_RS21025	4-hydroxybenzoate octaprenyltransferase
AVR78_RS21095	126.752	56.4913	1.1659	1.7058e-47	9.6047e-48	AVR78_RS21095	alanine racemase
AVR78_RS21130	173.633	82.9933	1.065	3.0121e-62	2.7426e-62	AVR78_RS21130	lytic transglycosylase F
AVR78_RS21140	406.302	197.371	1.0416	6.1485e-142	2.3318e-141	AVR78_RS21140	TonB-dependent siderophore receptor
AVR78_RS21160	34.7267	6.97423	2.3159	5.7044e-18	1.1367e-18	AVR78_RS21160	potassium:proton antiporter
AVR78_RS21165	272.605	48.4709	2.4916	2.0205e-132	6.7189e-132	AVR78_RS21165	outer membrane protein assembly factor BamA
AVR78_RS21170	15.627	0	4.4859	1.1248e-09	1.5927e-10	AVR78_RS21170	coproporphyrinogen III oxidase
AVR78_RS21180	95.4984	13.9485	2.7754	5.1054e-49	2.996e-49	AVR78_RS21180	inositol monophosphatase
AVR78_RS21185	29.5177	8.02036	1.8798	1.6807e-14	2.9029e-15	AVR78_RS21185	LacI family transcriptional regulator
AVR78_RS21200	152.797	20.9227	2.8685	5.809e-78	7.7493e-78	AVR78_RS21200	ABC transporter substrate-binding protein
AVR78_RS21205	24.3087	6.97423	1.8014	4.9594e-12	7.741e-13	AVR78_RS21205	ABC transporter permease
AVR78_RS21210	149.325	7.67165	4.2828	2.0486e-79	2.8661e-79	AVR78_RS21210	ABC transporter permease
AVR78_RS21220	251.769	104.962	1.2622	2.1228e-95	4.217e-95	AVR78_RS21220	EAL domain-containing protein
AVR78_RS21225	500.064	32.4302	3.9467	6.9626e-262	5.917e-261	AVR78_RS21225	DNA-binding transcriptional regulator SoxS
AVR78_RS21230	85.0804	27.5482	1.6269	8.9152e-37	3.5452e-37	AVR78_RS21230	redox-sensitive transcriptional activator SoxR
AVR78_RS21250	144.116	55.7938	1.3691	3.7503e-57	2.9369e-57	AVR78_RS21250	LysR family transcriptional regulator
AVR78_RS21255	17.3633	4.18454	2.0529	2.2086e-09	3.09e-10	AVR78_RS21255	murein hydrolase regulator LrgA
AVR78_RS21285	36.463	9.41521	1.9534	8.7268e-18	1.7247e-18	AVR78_RS21285	fimbrial morphology protein
AVR78_RS21305	60.7717	4.53325	3.7448	2.2049e-33	7.7952e-34	AVR78_RS21305	methionyl-tRNA formyltransferase
AVR78_RS21315	74.6624	3.83583	4.2828	1.3128e-40	5.8603e-41	AVR78_RS21315	hypothetical protein
AVR78_RS21325	159.743	61.3732	1.3801	2.3899e-63	2.2706e-63	AVR78_RS21325	sel1 repeat family protein
AVR78_RS21360	31.254	9.0665	1.7854	5.3608e-15	9.4184e-16	AVR78_RS21360	ribose ABC transporter permease
AVR78_RS21365	107.653	34.8711	1.6263	4.5746e-46	2.4698e-46	AVR78_RS21365	sugar ABC transporter ATP-binding protein
AVR78_RS21370	194.47	60.3271	1.6887	6.1423e-83	9.4271e-83	AVR78_RS21370	hybrid sensor histidine kinase/response regulator
AVR78_RS21375	36.463	14.2972	1.3507	1.3218e-15	2.3787e-16	AVR78_RS21375	hypothetical protein
AVR78_RS21390	34.7267	2.44098	3.8305	8.5427e-20	1.8285e-20	AVR78_RS21390	alpha-D-ribose 1-methylphosphonate 5-triphosphate diphosphatase
AVR78_RS21395	8.68167	0	4.6379	5.9247e-06	7.2003e-07	AVR78_RS21395	phosphonate C-P lyase system protein PhnL
AVR78_RS21400	43.4084	3.1384	3.7899	2.4741e-24	6.2868e-25	AVR78_RS21400	phosphonate C-P lyase system protein PhnK
AVR78_RS21405	8.68167	0	4.6379	5.9247e-06	7.2003e-07	AVR78_RS21405	carbon-phosphorus lyase complex subunit PhnJ
AVR78_RS21410	34.7267	1.74356	4.3159	9.3058e-20	1.9835e-20	AVR78_RS21410	carbon-phosphorus lyase complex subunit PhnI
AVR78_RS21415	22.5724	2.09227	3.4314	2.7362e-13	4.4765e-14	AVR78_RS21415	phosphonate C-P lyase system protein PhnH
AVR78_RS21420	8.68167	2.44098	1.8305	3.4693e-05	4.0686e-06	AVR78_RS21420	phosphonate C-P lyase system protein PhnG
AVR78_RS21425	17.3633	5.92809	1.5504	1.4406e-08	1.9449e-09	AVR78_RS21425	phosphonate metabolism transcriptional regulator PhnF
AVR78_RS21440	26.045	1.04613	4.6379	4.3442e-15	7.6558e-16	AVR78_RS21440	hypothetical protein
AVR78_RS21450	107.653	32.4302	1.731	3.6811e-47	2.0626e-47	AVR78_RS21450	transcriptional regulator MelR
AVR78_RS21455	130.225	53.3528	1.2874	1.3029e-50	8.0579e-51	AVR78_RS21455	alpha-glucosidase/alpha-galactosidase
AVR78_RS21460	163.215	46.7273	1.8044	1.1132e-71	1.3065e-71	AVR78_RS21460	melibiose:sodium transporter MelB
AVR78_RS21485	31.254	6.62552	2.2379	3.6986e-16	6.8219e-17	AVR78_RS21485	hypothetical protein
AVR78_RS21490	41.672	5.92809	2.8134	2.081e-22	4.8848e-23	AVR78_RS21490	hypothetical protein
AVR78_RS21500	55.5627	12.5536	2.146	4.0303e-27	1.1375e-27	AVR78_RS21500	poly-beta-1%2C6-N-acetyl-D-glucosamine biosynthesis protein PgaD
AVR78_RS21505	151.061	15.692	3.267	3.945e-79	5.4694e-79	AVR78_RS21505	poly-beta-1%2C6 N-acetyl-D-glucosamine synthase
AVR78_RS21510	98.9711	13.5997	2.8634	4.0271e-51	2.535e-51	pgaB	poly-beta-1%2C6-N-acetyl-D-glucosamine N-deacetylase PgaB
AVR78_RS21515	123.28	17.0869	2.851	3.6174e-63	3.395e-63	AVR78_RS21515	poly-beta-1%2C6 N-acetyl-D-glucosamine export porin PgaA
AVR78_RS21520	93.7621	22.6662	2.0485	6.7965e-44	3.4087e-44	AVR78_RS21520	LuxR family transcriptional regulator
AVR78_RS21525	131.961	63.1168	1.064	1.0071e-47	5.713e-48	AVR78_RS21525	PerC family transcriptional regulator
AVR78_RS21540	5.209	0	3.9009	0.00041908	4.6141e-05	AVR78_RS21540	tRNA-Phe
AVR78_RS21585	142.379	61.3732	1.2141	5.9854e-54	4.2127e-54	AVR78_RS21585	L-methionine/branched-chain amino acid transporter
AVR78_RS21625	48.6174	3.48711	3.8014	4.6334e-27	1.3053e-27	AVR78_RS21625	hypothetical protein
AVR78_RS21630	64.2444	27.8969	1.2035	3.3909e-25	8.8869e-26	AVR78_RS21630	fimbrial protein
AVR78_RS21640	13.8907	5.57938	1.3159	9.2186e-07	1.1603e-07	AVR78_RS21640	molecular chaperone
AVR78_RS21645	41.672	4.18454	3.3159	4.0049e-23	9.5722e-24	AVR78_RS21645	type 1 fimbrial protein
AVR78_RS21710	39.9357	9.76392	2.0321	1.3659e-19	2.8885e-20	AVR78_RS21710	inner membrane transporter YjeM
AVR78_RS21740	34.7267	0	6.118	6.2772e-18	1.2476e-18	AVR78_RS21740	hypothetical protein
AVR78_RS21755	36.463	13.9485	1.3863	9.4356e-16	1.7047e-16	AVR78_RS21755	tRNA-Gly
AVR78_RS21810	6.94534	2.09227	1.731	0.00024882	2.7748e-05	AVR78_RS21810	hypothetical protein
AVR78_RS21870	92.0258	39.4044	1.2237	1.3613e-35	5.2014e-36	AVR78_RS21870	L-ascorbate 6-phosphate lactonase
AVR78_RS21875	100.707	17.7843	2.5015	3.7212e-50	2.2799e-50	AVR78_RS21875	PTS ascorbate transporter subunit IIC
AVR78_RS21885	13.8907	3.48711	1.994	1.0273e-07	1.3386e-08	AVR78_RS21885	PTS ascorbate transporter subunit IIA
AVR78_RS21900	74.6624	8.36907	3.1572	8.6238e-40	3.7619e-40	araD	L-ribulose-5-phosphate 4-epimerase
AVR78_RS21995	104.18	30.3379	1.7799	3.5822e-46	1.9408e-46	AVR78_RS21995	arabinose operon transcriptional regulator AraC
AVR78_RS22000	109.389	43.2402	1.339	1.9314e-43	9.5923e-44	AVR78_RS22000	glycoside hydrolase
AVR78_RS22005	119.807	23.7124	2.337	4.195e-58	3.3773e-58	AVR78_RS22005	MFS transporter
AVR78_RS22035	62.5081	11.1588	2.4859	9.9373e-32	3.3069e-32	AVR78_RS22035	hypothetical protein
AVR78_RS22055	105.916	40.1018	1.4012	7.5019e-43	3.6702e-43	AVR78_RS22055	sugar ABC transporter ATP-binding protein
AVR78_RS22060	62.5081	17.7843	1.8134	1.4072e-28	4.1689e-29	AVR78_RS22060	ABC transporter permease
AVR78_RS22065	93.7621	20.2253	2.2128	4.6418e-45	2.4124e-45	AVR78_RS22065	sugar ABC transporter permease YjfF
AVR78_RS22080	32.9904	14.2972	1.2063	1.049e-13	1.7511e-14	AVR78_RS22080	N-acetyltransferase
AVR78_RS22115	12.1543	5.57938	1.1233	8.5727e-06	1.032e-06	AVR78_RS22115	hypothetical protein
AVR78_RS22130	45.1447	13.9485	1.6945	1.3854e-20	3.0375e-21	AVR78_RS22130	hypothetical protein
AVR78_RS22135	32.9904	10.8101	1.6097	3.5001e-15	6.1968e-16	AVR78_RS22135	amidohydrolase/deacetylase family metallohydrolase
AVR78_RS22140	138.907	13.9485	3.3159	4.4033e-73	5.3457e-73	AVR78_RS22140	SelA-like pyridoxal phosphate-dependent enzyme
AVR78_RS22145	93.7621	12.9023	2.8614	1.6219e-48	9.3976e-49	AVR78_RS22145	4-hydroxy-2-ketovalerate aldolase
AVR78_RS22150	67.7171	16.7381	2.0164	5.2841e-32	1.7804e-32	AVR78_RS22150	lactonase family protein
AVR78_RS22155	102.444	34.5224	1.5692	2.4795e-43	1.2288e-43	AVR78_RS22155	transcriptional regulator
AVR78_RS22200	59.0354	6.97423	3.0815	1.1191e-31	3.7161e-32	AVR78_RS22200	hypothetical protein
AVR78_RS22205	324.695	33.825	3.2629	8.236e-168	3.7795e-167	AVR78_RS22205	magnesium-translocating P-type ATPase
AVR78_RS22215	69.4534	16.0407	2.1143	2.5659e-33	9.0625e-34	AVR78_RS22215	aspartate carbamoyltransferase regulatory subunit
AVR78_RS22230	83.3441	31.384	1.409	3.7031e-34	1.3434e-34	AVR78_RS22230	YhcH/YjgK/YiaL family protein
AVR78_RS22290	46.881	19.8766	1.2379	5.205e-19	1.0798e-19	AVR78_RS22290	hypothetical protein
AVR78_RS22350	97.2348	28.943	1.7483	6.3317e-43	3.1076e-43	AVR78_RS22350	ABC transporter substrate-binding protein
AVR78_RS22355	29.5177	1.74356	4.0815	4.535e-17	8.7149e-18	AVR78_RS22355	ABC transporter ATP-binding protein
AVR78_RS22360	45.1447	2.44098	4.209	3.0476e-25	8.0009e-26	AVR78_RS22360	phosphodiesterase
AVR78_RS22365	38.1994	3.1384	3.6054	1.5515e-21	3.5386e-22	AVR78_RS22365	carbohydrate ABC transporter permease
AVR78_RS22370	19.0997	2.09227	3.1904	2.3362e-11	3.5335e-12	AVR78_RS22370	sugar ABC transporter permease
AVR78_RS22380	88.5531	34.1737	1.3737	7.7097e-36	2.9706e-36	AVR78_RS22380	SulP family inorganic anion transporter
AVR78_RS22390	26.045	4.18454	2.6379	2.3063e-14	3.9654e-15	AVR78_RS22390	hypothetical protein
AVR78_RS22395	166.688	2.09227	6.3159	3.237e-78	4.3819e-78	AVR78_RS22395	tRNA-Leu
AVR78_RS22400	8.68167	1.39485	2.6379	1.0506e-05	1.2578e-06	AVR78_RS22400	DUF4102 domain-containing protein
AVR78_RS22405	213.569	16.0407	3.7349	8.8844e-113	2.3298e-112	AVR78_RS22405	integrase
AVR78_RS22410	274.341	136.346	1.0087	2.5037e-95	4.9523e-95	AVR78_RS22410	restriction endonuclease
AVR78_RS22445	17.3633	0	4.6379	1.5031e-10	2.2072e-11	AVR78_RS22445	hypothetical protein
AVR78_RS22450	154.534	57.5374	1.4254	4.1288e-62	3.7371e-62	AVR78_RS22450	HNH endonuclease
AVR78_RS22455	119.807	47.7735	1.3264	3.0682e-47	1.7234e-47	AVR78_RS22455	HNH endonuclease
AVR78_RS22460	184.052	33.1276	2.474	7.6147e-90	1.3597e-89	AVR78_RS22460	glycoside hydrolase family 43 protein
AVR78_RS22465	175.37	31.7327	2.4664	1.2881e-85	2.0814e-85	AVR78_RS22465	MFS transporter
AVR78_RS22470	125.016	44.2864	1.4972	1.4865e-51	9.5811e-52	AVR78_RS22470	xylose isomerase
AVR78_RS22475	6.94534	1.04613	2.731	7.4923e-05	8.6236e-06	AVR78_RS22475	carbohydrate porin
AVR78_RS22480	97.2348	7.67165	3.6639	2.7113e-52	1.7877e-52	AVR78_RS22480	DUF1722 domain-containing protein
AVR78_RS22485	34.7267	1.74356	4.3159	9.3058e-20	1.9835e-20	AVR78_RS22485	DUF3833 domain-containing protein
AVR78_RS22490	6.94534	0	3.3159	5.2724e-05	6.1067e-06	AVR78_RS22490	hypothetical protein
AVR78_RS22495	15.627	4.88196	1.6785	4.6987e-08	6.2014e-09	AVR78_RS22495	DUF2878 domain-containing protein
AVR78_RS22500	65.9807	8.71779	2.92	8.1524e-35	3.0293e-35	AVR78_RS22500	class I SAM-dependent methyltransferase
AVR78_RS22510	79.8714	14.9946	2.4132	1.0236e-39	4.4316e-40	AVR78_RS22510	L-aspartate oxidase
AVR78_RS22525	27.7814	3.83583	2.8565	1.6412e-15	2.9431e-16	AVR78_RS22525	hypothetical protein
AVR78_RS22540	20.836	9.0665	1.2005	3.5748e-09	4.9516e-10	AVR78_RS22540	DUF1294 domain-containing protein
AVR78_RS22545	258.714	17.0869	3.9204	1.8293e-136	6.4575e-136	AVR78_RS22545	CusA/CzcA family heavy metal efflux RND transporter
AVR78_RS22550	60.7717	6.62552	3.1973	8.8923e-33	3.0914e-33	AVR78_RS22550	efflux RND transporter periplasmic adaptor subunit
AVR78_RS22555	17.3633	0	4.6379	1.5031e-10	2.2072e-11	AVR78_RS22555	periplasmic copper-binding protein
AVR78_RS22560	62.5081	6.27681	3.3159	7.3476e-34	2.6383e-34	AVR78_RS22560	copper/silver efflux system outer membrane protein CusC
AVR78_RS22575	152.797	38.707	1.981	1.4564e-69	1.6462e-69	AVR78_RS22575	two-component sensor histidine kinase
AVR78_RS22600	10.418	1.39485	2.9009	1.0234e-06	1.285e-07	rrf	5S ribosomal RNA
AVR78_RS22605	74.6624	30.3379	1.2993	7.4694e-30	2.3036e-30	AVR78_RS22605	DUF2574 domain-containing protein
AVR78_RS22635	17.3633	2.78969	2.6379	4.6133e-10	6.6345e-11	AVR78_RS22635	QacE family quaternary ammonium compound efflux SMR transporter
AVR78_RS22640	10.418	3.1384	1.731	7.2292e-06	8.7556e-07	AVR78_RS22640	QacE family quaternary ammonium compound efflux SMR transporter
AVR78_RS22645	38.1994	7.67165	2.3159	1.305e-19	2.7636e-20	AVR78_RS22645	hypothetical protein
AVR78_RS22650	10.418	0	3.9009	6.0687e-07	7.6911e-08	AVR78_RS22650	phosphate propanoyltransferase
AVR78_RS22655	5.209	0	2.9009	0.00054889	6.0101e-05	AVR78_RS22655	BMC domain-containing protein
AVR78_RS22660	46.881	5.92809	2.9834	2.4684e-25	6.4915e-26	AVR78_RS22660	choline TMA-lyase-activating enzyme
AVR78_RS22665	149.325	23.7124	2.6547	9.6103e-75	1.205e-74	AVR78_RS22665	choline trimethylamine-lyase
AVR78_RS22670	69.4534	12.2049	2.5086	3.6926e-35	1.389e-35	AVR78_RS22670	iron-containing alcohol dehydrogenase
AVR78_RS22685	6.94534	1.74356	1.994	0.00016783	1.8914e-05	AVR78_RS22685	ribonuclease III
AVR78_RS22695	8.68167	2.09227	2.0529	2.3403e-05	2.7594e-06	AVR78_RS22695	BMC domain-containing protein
AVR78_RS22715	46.881	10.8101	2.1166	4.9339e-23	1.175e-23	AVR78_RS22715	flavodoxin family protein
AVR78_RS22735	208.36	71.4858	1.5434	1.0517e-85	1.7054e-85	AVR78_RS22735	PLP-dependent aminotransferase family protein
AVR78_RS22750	41.672	18.4817	1.173	9.5611e-17	1.8019e-17	AVR78_RS22750	HlyD family secretion protein
AVR78_RS22755	135.434	11.8562	3.5139	7.6792e-72	9.0591e-72	AVR78_RS22755	DUF2955 domain-containing protein
AVR78_RS22760	19.0997	4.88196	1.968	4.8065e-10	6.8971e-11	AVR78_RS22760	DUF3343 domain-containing protein
AVR78_RS22790	32.9904	8.02036	2.0403	1.7806e-16	3.319e-17	AVR78_RS22790	LysE family translocator
AVR78_RS22800	130.225	28.2456	2.2049	8.2067e-62	7.3556e-62	AVR78_RS22800	ISNCY family transposase
AVR78_RS22810	32.9904	5.23067	2.657	8.0717e-18	1.5973e-18	AVR78_RS22810	hypothetical protein
AVR78_RS22815	102.444	38.3583	1.4172	1.1032e-41	5.1347e-42	AVR78_RS22815	hypothetical protein
AVR78_RS22820	105.916	31.384	1.7548	1.1497e-46	6.3645e-47	AVR78_RS22820	GTPase
AVR78_RS22830	215.306	34.8711	2.6263	1.3047e-106	3.1678e-106	AVR78_RS22830	carbon starvation protein A
AVR78_RS22900	142.379	14.2972	3.3159	7.301e-75	9.2045e-75	AVR78_RS22900	pyridine nucleotide-disulfide oxidoreductase
AVR78_RS22910	31.254	2.44098	3.6785	6.2059e-18	1.2339e-18	AVR78_RS22910	FAD-binding oxidoreductase
AVR78_RS22915	22.5724	4.53325	2.3159	3.2976e-12	5.1806e-13	AVR78_RS22915	4-hydroxyproline epimerase
AVR78_RS22920	83.3441	23.7124	1.8134	1.5297e-37	6.2122e-38	AVR78_RS22920	AraC family transcriptional regulator
AVR78_RS22925	48.6174	12.2049	1.994	2.3671e-23	5.7203e-24	AVR78_RS22925	dihydrodipicolinate synthase family protein
AVR78_RS22930	86.8167	20.2253	2.1018	3.907e-41	1.7845e-41	AVR78_RS22930	aldehyde dehydrogenase (NADP(+))
AVR78_RS22935	131.961	19.8766	2.731	9.085e-67	9.6508e-67	AVR78_RS22935	APC family permease
AVR78_RS22955	156.27	17.7843	3.1354	3.2754e-81	4.8175e-81	AVR78_RS22955	D-aminoacylase
AVR78_RS22960	62.5081	3.48711	4.1639	2.5063e-34	9.1719e-35	AVR78_RS22960	RidA family protein
AVR78_RS22965	97.2348	46.3786	1.068	1.139e-35	4.3631e-36	AVR78_RS22965	sodium:solute symporter family protein
AVR78_RS22970	67.7171	18.4817	1.8734	3.4852e-31	1.1295e-31	AVR78_RS22970	2-oxo-3-deoxygalactonate kinase
AVR78_RS22975	64.2444	21.6201	1.5712	8.0603e-28	2.3205e-28	AVR78_RS22975	2-dehydro-3-deoxy-6-phosphogalactonate aldolase
AVR78_RS22990	149.325	25.8046	2.5328	9.287e-74	1.1457e-73	AVR78_RS22990	N-acetyltransferase
AVR78_RS23000	36.463	8.02036	2.1847	1.8755e-18	3.7982e-19	AVR78_RS23000	PTS mannose transporter subunit IIA
AVR78_RS23010	59.0354	19.5278	1.596	7.5711e-26	2.0283e-26	AVR78_RS23010	PTS mannose/fructose/sorbose/N-acetylgalactosamine transporter subunit IIC
AVR78_RS23015	102.444	13.5997	2.9132	4.6113e-53	3.1631e-53	AVR78_RS23015	PTS mannose transporter subunit IID
AVR78_RS23020	79.8714	17.0869	2.2248	1.0375e-38	4.368e-39	AVR78_RS23020	SIS domain-containing protein
AVR78_RS23025	137.17	30.6866	2.1603	1.4531e-64	1.4341e-64	AVR78_RS23025	SIS domain-containing protein
AVR78_RS23075	67.7171	29.2918	1.209	1.6288e-26	4.4973e-27	AVR78_RS23075	AraC family transcriptional regulator
AVR78_RS23095	154.534	66.6039	1.2142	2.1002e-58	1.7119e-58	AVR78_RS23095	PTS cellobiose transporter subunit IIC
AVR78_RS23115	182.315	53.0041	1.7823	1.7658e-79	2.478e-79	AVR78_RS23115	DUF1435 domain-containing protein
AVR78_RS23120	10.418	2.44098	2.0935	3.3234e-06	4.0855e-07	AVR78_RS23120	tRNA-Leu
AVR78_RS23210	64.2444	29.6405	1.116	1.6303e-24	4.1726e-25	AVR78_RS23210	hypothetical protein
AVR78_RS23215	17.3633	4.53325	1.9374	3.2524e-09	4.516e-10	AVR78_RS23215	phosphoserine phosphatase
AVR78_RS23240	22.5724	6.27681	1.8465	2.2775e-11	3.4494e-12	AVR78_RS23240	methionine aminopeptidase
AVR78_RS23285	163.215	27.8969	2.5486	1.3642e-80	1.9687e-80	AVR78_RS23285	cell envelope integrity protein CreD
AVR78_RS23295	39.9357	13.251	1.5916	5.5521e-18	1.1082e-18	AVR78_RS23295	hypothetical protein
AVR78_RS23310	17.3633	4.53325	1.9374	3.2524e-09	4.516e-10	AVR78_RS23310	thr operon leader peptide
AVR78_RS23435	81.6077	38.3583	1.0892	2.0082e-30	6.3163e-31	AVR78_RS23435	LysR family transcriptional regulator
AVR78_RS23440	130.225	21.2714	2.614	3.8297e-65	3.8456e-65	AVR78_RS23440	hypothetical protein
AVR78_RS23445	48.6174	17.4356	1.4794	5.5858e-21	1.2462e-21	dpiA	response regulator
AVR78_RS23450	98.9711	25.4559	1.959	1.6373e-45	8.676e-46	AVR78_RS23450	sensor histidine kinase
AVR78_RS23455	217.042	11.8562	4.1943	1.0722e-114	2.8442e-114	AVR78_RS23455	sodium ion-translocating decarboxylase subunit beta
AVR78_RS23460	52.09	8.02036	2.6993	2.5308e-27	7.1734e-28	AVR78_RS23460	oxaloacetate decarboxylase subunit alpha
AVR78_RS23465	5.209	1.39485	1.9009	0.0012377	0.00013271	AVR78_RS23465	oxaloacetate decarboxylase subunit gamma
AVR78_RS23470	69.4534	23.015	1.5935	4.2421e-30	1.3189e-30	AVR78_RS23470	citrate/sodium symporter CitN
AVR78_RS23485	53.8264	3.83583	3.8107	8.7289e-30	2.6848e-30	AVR78_RS23485	citrate (pro-3S)-lyase subunit beta
AVR78_RS23490	111.125	25.1072	2.146	1.5674e-52	1.0501e-52	AVR78_RS23490	citrate lyase subunit alpha
AVR78_RS23495	147.588	10.4613	3.8184	1.2874e-78	1.7583e-78	AVR78_RS23495	triphosphoribosyl-dephospho-CoA synthase CitG
AVR78_RS23530	276.077	79.5062	1.7959	1.0262e-119	2.9071e-119	AVR78_RS23530	glutathione-regulated potassium-efflux system protein KefC
AVR78_RS23585	147.588	71.8346	1.0388	1.0679e-52	7.2279e-53	AVR78_RS23585	sensor histidine kinase
AVR78_RS23590	196.206	48.8196	2.0068	3.2957e-89	5.7946e-89	AVR78_RS23590	citrate/acetate antiporter
AVR78_RS23595	22.5724	4.18454	2.4314	2.23e-12	3.5264e-13	AVR78_RS23595	hypothetical protein
AVR78_RS23625	81.6077	12.9023	2.6611	1.0862e-41	5.0606e-42	AVR78_RS23625	L-arabinose isomerase
AVR78_RS23630	109.389	11.5075	3.2488	9.2902e-58	7.3887e-58	AVR78_RS23630	ribulokinase
AVR78_RS23665	503.537	201.555	1.3209	3.1763e-192	1.7353e-191	AVR78_RS23665	glucose uptake inhibitor SgrT
AVR78_RS23695	65.9807	20.9227	1.657	4.2718e-29	1.2804e-29	AVR78_RS23695	MFS transporter
AVR78_RS23700	36.463	9.0665	2.0078	5.9601e-18	1.1861e-18	AVR78_RS23700	shikimate dehydrogenase
AVR78_RS23705	116.334	53.0041	1.1341	2.7536e-43	1.3631e-43	AVR78_RS23705	2%2C4-dienoyl-CoA reductase
AVR78_RS23715	90.2894	26.5021	1.7685	3.7413e-40	1.6477e-40	AVR78_RS23715	3-isopropylmalate dehydratase large subunit
AVR78_RS23720	74.6624	27.8969	1.4203	7.2298e-31	2.3169e-31	AVR78_RS23720	3-isopropylmalate dehydrogenase
AVR78_RS23745	57.2991	4.88196	3.553	1.918e-31	6.2869e-32	AVR78_RS23745	hypothetical protein
AVR78_RS23765	22.5724	5.92809	1.9289	1.558e-11	2.3801e-12	AVR78_RS23765	hypothetical protein
AVR78_RS23890	142.379	5.23067	4.7666	8.7192e-75	1.0962e-74	AVR78_RS23890	type IV pilin biogenesis protein
AVR78_RS23895	50.3537	5.57938	3.1739	2.0711e-27	5.8776e-28	AVR78_RS23895	type II secretion system protein GspE
AVR78_RS23900	10.418	1.74356	2.579	1.4984e-06	1.865e-07	AVR78_RS23900	prepilin peptidase-dependent pilin
AVR78_RS23920	152.797	28.2456	2.4355	1.4893e-74	1.8623e-74	AVR78_RS23920	alpha-N-arabinofuranosidase
AVR78_RS23925	95.4984	5.92809	4.0098	1.4486e-51	9.3497e-52	AVR78_RS23925	MFS transporter
AVR78_RS23960	22.5724	9.76392	1.209	7.6343e-10	1.0873e-10	AVR78_RS23960	hypothetical protein
AVR78_RS24000	119.807	37.3121	1.683	9.8261e-52	6.3689e-52	AVR78_RS24000	FKBP-type peptidyl-prolyl cis-trans isomerase
AVR78_RS24110	71.1897	2.44098	4.8661	3.9379e-38	1.6236e-38	AVR78_RS24110	prepilin peptidase
AVR78_RS24115	22.5724	2.44098	3.209	3.6138e-13	5.8892e-14	AVR78_RS24115	type II secretion system protein N
AVR78_RS24120	17.3633	4.53325	1.9374	3.2524e-09	4.516e-10	AVR78_RS24120	type II secretion system protein M
AVR78_RS24125	41.672	9.41521	2.146	9.589e-21	2.1197e-21	AVR78_RS24125	type II secretion system protein GspL
AVR78_RS24130	41.672	2.44098	4.0935	1.8986e-23	4.6271e-24	AVR78_RS24130	general secretion pathway protein K
AVR78_RS24135	8.68167	0	3.6379	5.4755e-06	6.6721e-07	AVR78_RS24135	type II secretion system protein GspJ
AVR78_RS24140	13.8907	0	5.3159	1.7749e-08	2.3809e-09	AVR78_RS24140	type II secretion system protein GspI
AVR78_RS24145	12.1543	5.57938	1.1233	8.5727e-06	1.032e-06	AVR78_RS24145	type II secretion system protein GspH
AVR78_RS24150	24.3087	0	5.1233	6.6396e-14	1.1206e-14	AVR78_RS24150	type II secretion system protein GspG
AVR78_RS24155	27.7814	8.36907	1.731	2.3538e-13	3.8618e-14	AVR78_RS24155	type II secretion system protein GspF
AVR78_RS24160	39.9357	10.1126	1.9815	2.0013e-19	4.2245e-20	AVR78_RS24160	type II secretion system protein GspE
AVR78_RS24170	86.8167	11.1588	2.9598	2.1295e-45	1.1246e-45	AVR78_RS24170	type II secretion system protein GspC
AVR78_RS24180	236.142	115.772	1.0284	6.6193e-83	1.0125e-82	AVR78_RS24180	DUF3372 domain-containing protein
AVR78_RS24185	62.5081	5.23067	3.579	3.5823e-34	1.3006e-34	AVR78_RS24185	general secretion pathway protein GspB
AVR78_RS24220	159.743	54.399	1.5541	2.5559e-66	2.6718e-66	AVR78_RS24220	Fe(3+)-hydroxamate ABC transporter permease FhuB
AVR78_RS24240	78.1351	35.5686	1.1354	1.2069e-29	3.6824e-30	AVR78_RS24240	hypothetical protein
AVR78_RS24420	5.209	1.04613	2.3159	0.00082109	8.9099e-05	AVR78_RS24420	hypothetical protein
AVR78_RS24490	71.1897	11.8562	2.586	2.6323e-36	1.0284e-36	AVR78_RS24490	2%2C5-didehydrogluconate reductase DkgB
AVR78_RS24500	43.4084	20.574	1.0772	7.2508e-17	1.3795e-17	AVR78_RS24500	MFS transporter
AVR78_RS24510	130.225	28.943	2.1697	1.7699e-61	1.5802e-61	AVR78_RS24510	SAM-dependent methyltransferase
AVR78_RS24540	48.6174	1.39485	5.1233	3.0028e-26	8.1927e-27	AVR78_RS24540	tRNA-Asp
AVR78_RS24550	111.125	6.62552	4.068	1.0624e-59	9.0122e-60	AVR78_RS24550	cysteine/O-acetylserine transporter
AVR78_RS24585	24.3087	7.67165	1.6639	1.0383e-11	1.5979e-12	AVR78_RS24585	hypothetical protein
AVR78_RS24625	52.09	10.1126	2.3648	2.5106e-26	6.8906e-27	AVR78_RS24625	glycerophosphoryl diester phosphodiesterase
AVR78_RS24635	98.9711	21.9688	2.1715	3.6181e-47	2.0297e-47	AVR78_RS24635	acyltransferase
AVR78_RS24660	46.881	18.133	1.3704	1.0014e-19	2.1304e-20	AVR78_RS24660	serine acetyltransferase
AVR78_RS24690	76.3987	28.943	1.4003	2.2272e-31	7.2848e-32	AVR78_RS24690	hypothetical protein
AVR78_RS24750	15.627	1.74356	3.1639	1.5348e-09	2.1631e-10	AVR78_RS24750	hypothetical protein
AVR78_RS24775	130.225	33.1276	1.9749	1.7136e-59	1.4403e-59	AVR78_RS24775	oxidoreductase
AVR78_RS24780	45.1447	14.6459	1.6241	2.8515e-20	6.1812e-21	AVR78_RS24780	3-oxoacyl-ACP reductase
AVR78_RS24800	31.254	5.92809	2.3984	1.6974e-16	3.169e-17	AVR78_RS24800	hypothetical protein
AVR78_RS24810	163.215	10.8101	3.9163	8.2911e-87	1.3886e-86	AVR78_RS24810	dihydrolipoyl dehydrogenase
AVR78_RS24815	74.6624	16.7381	2.1572	6.2516e-36	2.4128e-36	AVR78_RS24815	dihydrolipoamide acetyltransferase acetoin dehydrogenase complex
AVR78_RS24820	97.2348	28.943	1.7483	6.3317e-43	3.1076e-43	AVR78_RS24820	alpha-ketoacid dehydrogenase subunit beta
AVR78_RS24825	197.942	14.6459	3.7565	1.0539e-104	2.4676e-104	AVR78_RS24825	acetoin:2%2C6-dichlorophenolindophenol oxidoreductase subunit alpha
AVR78_RS24845	34.7267	4.88196	2.8305	5.7873e-19	1.1985e-19	AVR78_RS24845	type 1 fimbrial protein
AVR78_RS24850	20.836	6.62552	1.653	3.206e-10	4.6426e-11	AVR78_RS24850	hypothetical protein
AVR78_RS24855	482.701	160.059	1.5925	2.1573e-198	1.1928e-197	AVR78_RS24855	fimbrial protein
AVR78_RS24885	60.7717	7.32294	3.0529	1.6808e-32	5.7778e-33	AVR78_RS24885	helix-turn-helix domain-containing protein
AVR78_RS24895	41.672	9.76392	2.0935	1.4102e-20	3.0874e-21	AVR78_RS24895	hypothetical protein
AVR78_RS24900	19.0997	4.88196	1.968	4.8065e-10	6.8971e-11	AVR78_RS24900	2OG-Fe(II) oxygenase
AVR78_RS24905	38.1994	4.88196	2.968	6.4267e-21	1.4303e-21	AVR78_RS24905	tRNA-Thr
AVR78_RS24935	41.672	2.44098	4.0935	1.8986e-23	4.6271e-24	AVR78_RS24935	hypothetical protein
AVR78_RS24940	62.5081	23.015	1.4415	2.9505e-26	8.0595e-27	AVR78_RS24940	EamA/RhaT family transporter
AVR78_RS24945	180.579	19.5278	3.209	6.1117e-94	1.1834e-93	AVR78_RS24945	HAD-IB family hydrolase
AVR78_RS24950	19.0997	2.78969	2.7754	4.6729e-11	7.001e-12	AVR78_RS24950	hypothetical protein
AVR78_RS24960	45.1447	5.23067	3.1095	1.1809e-24	3.0376e-25	AVR78_RS24960	phosphonate ABC transporter%2C permease protein PhnE
AVR78_RS24965	31.254	3.48711	3.1639	1.3099e-17	2.57e-18	AVR78_RS24965	phosphonate ABC transporter%2C permease protein PhnE
AVR78_RS24970	38.1994	13.5997	1.49	7.3205e-17	1.3922e-17	AVR78_RS24970	phosphonate ABC transporter substrate-binding protein
AVR78_RS24990	19.0997	3.48711	2.4534	1.0069e-10	1.4901e-11	AVR78_RS24990	hypothetical protein
AVR78_RS24995	274.341	13.5997	4.3343	3.7822e-144	1.4835e-143	AVR78_RS24995	fimbrial biogenesis outer membrane usher protein
AVR78_RS25000	126.752	5.92809	4.4183	1.627e-67	1.7568e-67	AVR78_RS25000	hypothetical protein
AVR78_RS25005	107.653	14.9946	2.8439	2.3338e-55	1.7386e-55	AVR78_RS25005	hypothetical protein
AVR78_RS25010	32.9904	14.6459	1.1715	1.4442e-13	2.3953e-14	AVR78_RS25010	amino acid ABC transporter permease
AVR78_RS25015	46.881	5.57938	3.0708	1.7638e-25	4.6599e-26	AVR78_RS25015	amino acid ABC transporter permease
AVR78_RS25020	50.3537	9.0665	2.4735	7.6129e-26	2.0383e-26	AVR78_RS25020	amino acid ABC transporter ATP-binding protein
AVR78_RS25025	55.5627	15.3433	1.8565	8.4214e-26	2.2508e-26	AVR78_RS25025	cysteine ABC transporter substrate-binding protein
AVR78_RS25035	59.0354	5.92809	3.3159	4.5016e-32	1.5223e-32	AVR78_RS25035	ABC transporter ATP-binding protein
AVR78_RS25040	24.3087	3.1384	2.9534	7.3945e-14	1.243e-14	livG	ABC transporter ATP-binding protein
AVR78_RS25045	36.463	2.09227	4.1233	1.0305e-20	2.2736e-21	AVR78_RS25045	branched-chain amino acid ABC transporter permease
AVR78_RS25050	24.3087	10.1126	1.2653	1.1789e-10	1.7401e-11	AVR78_RS25050	branched-chain amino acid ABC transporter permease
AVR78_RS25055	100.707	12.2049	3.0446	1.0895e-52	7.3633e-53	AVR78_RS25055	branched-chain amino acid ABC transporter substrate-binding protein
AVR78_RS25065	64.2444	13.9485	2.2035	2.266e-31	7.4012e-32	AVR78_RS25065	ethanolamine ammonia-lyase subunit EutC
AVR78_RS25075	152.797	20.9227	2.8685	5.809e-78	7.7493e-78	AVR78_RS25075	ethanolamine permease
AVR78_RS25085	145.852	31.0353	2.2325	2.6913e-69	3.0196e-69	AVR78_RS25085	amino acid permease
AVR78_RS25095	83.3441	10.8101	2.9467	1.3062e-43	6.5152e-44	AVR78_RS25095	taurine ABC transporter substrate-binding protein
AVR78_RS25100	83.3441	5.92809	3.8134	3.497e-45	1.832e-45	tauB	taurine ABC transporter ATP-binding protein
AVR78_RS25105	19.0997	1.74356	3.4534	1.7681e-11	2.6938e-12	AVR78_RS25105	taurine transporter subunit
AVR78_RS25110	53.8264	9.41521	2.5152	1.2025e-27	3.436e-28	AVR78_RS25110	taurine dioxygenase
AVR78_RS25115	140.643	16.0407	3.1322	2.9011e-73	3.5502e-73	AVR78_RS25115	hypothetical protein
AVR78_RS25120	50.3537	10.1126	2.3159	2.4289e-25	6.3913e-26	AVR78_RS25120	transposase
AVR78_RS25145	121.543	39.4044	1.625	9.1269e-52	5.9241e-52	AVR78_RS25145	DUF1615 domain-containing protein
AVR78_RS25150	41.672	12.5536	1.731	2.8664e-19	5.9872e-20	AVR78_RS25150	DUF2755 domain-containing protein
AVR78_RS25235	229.196	64.1629	1.8368	1.4635e-100	3.2443e-100	AVR78_RS25235	exonuclease subunit SbcC
AVR78_RS25265	163.215	34.8711	2.2267	2.9491e-77	3.8667e-77	AVR78_RS25265	maltodextrin glucosidase
AVR78_RS25270	78.1351	33.1276	1.2379	1.3184e-30	4.1781e-31	AVR78_RS25270	LysR family transcriptional regulator
AVR78_RS25275	38.1994	11.1588	1.7754	5.9295e-18	1.1805e-18	AVR78_RS25275	hydrolase
AVR78_RS25280	48.6174	8.02036	2.5997	2.3257e-25	6.1268e-26	AVR78_RS25280	antibiotic biosynthesis monooxygenase
AVR78_RS25285	180.579	30.6866	2.5569	4.77e-89	8.3547e-89	AVR78_RS25285	amidohydrolase
AVR78_RS25290	79.8714	20.9227	1.9326	6.9193e-37	2.7611e-37	AVR78_RS25290	fructose-1%2C6-bisphosphate aldolase%2C class II
AVR78_RS25295	78.1351	25.8046	1.5983	1.0888e-33	3.8853e-34	AVR78_RS25295	PfkB domain-containing protein
AVR78_RS25360	26.045	5.92809	2.1354	1.6092e-13	2.6611e-14	AVR78_RS25360	VOC family protein
AVR78_RS25365	67.7171	23.3637	1.5353	5.5417e-29	1.6578e-29	AVR78_RS25365	YafY family transcriptional regulator
AVR78_RS25375	59.0354	17.4356	1.7595	8.6685e-27	2.4138e-27	AVR78_RS25375	hypothetical protein
AVR78_RS25465	69.4534	8.02036	3.1143	4.8315e-37	1.9398e-37	AVR78_RS25465	MFS transporter
AVR78_RS25470	12.1543	4.18454	1.5383	2.1878e-06	2.7098e-07	AVR78_RS25470	sugar phosphate isomerase/epimerase
AVR78_RS25475	67.7171	13.251	2.3534	1.1273e-33	4.0197e-34	AVR78_RS25475	fumarate reductase/succinate dehydrogenase flavoprotein domain-containing protein
AVR78_RS25485	105.916	11.5075	3.2023	7.5723e-56	5.706e-56	AVR78_RS25485	FAD-binding protein
AVR78_RS25490	22.5724	6.97423	1.6945	4.7978e-11	7.1834e-12	AVR78_RS25490	shikimate dehydrogenase
AVR78_RS25495	128.489	17.7843	2.853	9.0362e-66	9.2355e-66	AVR78_RS25495	IclR family transcriptional regulator
AVR78_RS25500	27.7814	11.8562	1.2285	7.5491e-12	1.1692e-12	AVR78_RS25500	hypothetical protein
AVR78_RS25600	703.216	33.825	4.3778	0	0	AVR78_RS25600	HMP-PP phosphatase
AVR78_RS25625	34.7267	13.5997	1.3525	6.0962e-15	1.0702e-15	AVR78_RS25625	nitrogen regulatory protein P-II 2
AVR78_RS25630	149.325	33.825	2.1423	6.3839e-70	7.2514e-70	AVR78_RS25630	ammonium transporter
AVR78_RS25655	52.09	4.53325	3.5224	1.0339e-28	3.0769e-29	ffs	signal recognition particle sRNA small type
AVR78_RS25675	131.961	21.2714	2.6331	4.0371e-66	4.1915e-66	AVR78_RS25675	membrane protein
AVR78_RS25680	112.862	11.8562	3.2508	1.5349e-59	1.2924e-59	AVR78_RS25680	nickel/cobalt efflux protein RcnA
AVR78_RS25695	185.788	40.7992	2.187	3.7593e-87	6.3424e-87	AVR78_RS25695	sn-glycerol-3-phosphate ABC transporter ATP-binding protein UgpC
AVR78_RS25705	85.0804	34.5224	1.3013	8.3638e-34	2.9939e-34	AVR78_RS25705	ABC transporter substrate-binding protein
AVR78_RS25710	133.698	10.1126	3.7247	2.6638e-71	3.0948e-71	AVR78_RS25710	sugar ABC transporter permease
AVR78_RS25715	39.9357	4.88196	3.0321	6.8451e-22	1.5722e-22	AVR78_RS25715	arabinogalactan ABC transporter permease
AVR78_RS25720	119.807	5.92809	4.337	5.0361e-64	4.8552e-64	AVR78_RS25720	glycosyl hydrolase family 53
AVR78_RS25725	140.643	27.5482	2.352	4.9864e-68	5.4612e-68	AVR78_RS25725	beta-galactosidase
AVR78_RS25730	36.463	1.74356	4.3863	1.2209e-20	2.6833e-21	AVR78_RS25730	PTS IIB component
AVR78_RS25760	298.65	42.8915	2.7997	1.2221e-149	5.1927e-149	AVR78_RS25760	PLP-dependent aminotransferase family protein
AVR78_RS25815	5.209	1.04613	2.3159	0.00082109	8.9099e-05	AVR78_RS25815	DUF2496 domain-containing protein
AVR78_RS25925	81.6077	39.0557	1.0632	3.6933e-30	1.1514e-30	AVR78_RS25925	iron ABC transporter ATP-binding protein FetA
AVR78_RS25930	72.9261	31.7327	1.2005	2.3636e-28	6.9665e-29	AVR78_RS25930	iron export ABC transporter permease subunit FetB
AVR78_RS25955	263.923	126.931	1.0561	2.3545e-93	4.4833e-93	AVR78_RS25955	ABC transporter permease
AVR78_RS25985	26.045	5.57938	2.2228	1.0901e-13	1.8151e-14	AVR78_RS25985	MarR family transcriptional regulator
AVR78_RS25990	13.8907	5.92809	1.2285	1.289e-06	1.6105e-07	AVR78_RS25990	hypothetical protein
AVR78_RS26010	15.627	3.83583	2.0264	1.5019e-08	2.0236e-09	AVR78_RS26010	ribosome-associated protein
AVR78_RS26020	13.8907	1.74356	2.994	1.4835e-08	2e-09	AVR78_RS26020	hypothetical protein
AVR78_RS26070	3.47267	0	3.3159	0.00425	0.00044236	AVR78_RS26070	hypothetical protein
AVR78_RS26085	335.113	43.9376	2.9311	1.6197e-169	7.6629e-169	AVR78_RS26085	DUF927 domain-containing protein
AVR78_RS26095	39.9357	15.692	1.3476	6.2326e-17	1.1892e-17	AVR78_RS26095	single-stranded DNA-binding protein
AVR78_RS26100	175.37	9.76392	4.1668	4.5019e-93	8.5017e-93	AVR78_RS26100	hypothetical protein
AVR78_RS26110	69.4534	8.71779	2.994	9.361e-37	3.7193e-37	AVR78_RS26110	PerC family transcriptional regulator
AVR78_RS26115	140.643	39.4044	1.8356	2.0387e-62	1.86e-62	AVR78_RS26115	hypothetical protein
AVR78_RS26200	164.952	56.1425	1.5549	1.9583e-68	2.1602e-68	AVR78_RS26200	citrate synthase
AVR78_RS26230	109.389	48.1222	1.1847	1.782e-41	8.2437e-42	cadB	lysine/cadaverine antiporter
AVR78_RS26235	190.997	30.6866	2.6379	6.586e-95	1.2971e-94	AVR78_RS26235	lysine decarboxylase CadA
AVR78_RS26240	100.707	6.62552	3.926	2.8473e-54	2.0321e-54	AVR78_RS26240	MFS transporter
AVR78_RS26265	177.106	11.5075	3.944	4.8154e-94	9.3636e-94	AVR78_RS26265	gfo/Idh/MocA family oxidoreductase
AVR78_RS26270	109.389	13.251	3.0453	4.4452e-57	3.4693e-57	AVR78_RS26270	gfo/Idh/MocA family oxidoreductase
AVR78_RS26275	60.7717	9.0665	2.7448	9.8258e-32	3.2746e-32	AVR78_RS26275	inositol 2-dehydrogenase
AVR78_RS26280	137.17	25.4559	2.4299	4.5226e-67	4.8378e-67	AVR78_RS26280	LacI family transcriptional regulator
AVR78_RS26290	168.424	71.1371	1.2434	4.5475e-64	4.3934e-64	AVR78_RS26290	sugar ABC transporter ATP-binding protein
AVR78_RS26305	32.9904	11.8562	1.4764	1.0094e-14	1.7593e-15	AVR78_RS26305	hypothetical protein
AVR78_RS26345	13.8907	1.74356	2.994	1.4835e-08	2e-09	AVR78_RS26345	DUF3302 domain-containing protein
AVR78_RS26355	104.18	9.41521	3.4679	1.3305e-55	9.9278e-56	AVR78_RS26355	iron ABC transporter ATP-binding protein
AVR78_RS26360	48.6174	9.76392	2.3159	1.5963e-24	4.0901e-25	AVR78_RS26360	iron ABC transporter permease
AVR78_RS26365	46.881	9.76392	2.2635	1.5469e-23	3.7982e-24	AVR78_RS26365	iron ABC transporter substrate-binding protein
AVR78_RS26380	1279.68	434.843	1.5572	0	0	AVR78_RS26380	hypothetical protein
AVR78_RS26385	48.6174	8.71779	2.4794	5.0021e-25	1.3006e-25	AVR78_RS26385	hypothetical protein
AVR78_RS26395	98.9711	25.8046	1.9394	2.3865e-45	1.2574e-45	AVR78_RS26395	amidohydrolase
AVR78_RS26400	85.0804	16.3894	2.3761	5.4131e-42	2.5557e-42	AVR78_RS26400	ABC transporter substrate-binding protein
AVR78_RS26410	20.836	1.04613	4.3159	1.8372e-12	2.9132e-13	AVR78_RS26410	hypothetical protein
AVR78_RS26420	69.4534	9.0665	2.9374	1.3209e-36	5.2211e-37	AVR78_RS26420	molybdenum cofactor biosynthesis protein F
AVR78_RS26425	19.0997	8.71779	1.1315	2.3141e-08	3.0826e-09	AVR78_RS26425	NAD(P)-dependent oxidoreductase
AVR78_RS26430	149.325	28.943	2.3672	2.9264e-72	3.4881e-72	AVR78_RS26430	arylsulfatase
AVR78_RS26435	81.6077	24.0611	1.762	2.0765e-36	8.1723e-37	AVR78_RS26435	anaerobic sulfatase maturase
AVR78_RS26445	90.2894	20.9227	2.1095	9.1821e-43	4.4826e-43	AVR78_RS26445	MFS transporter
AVR78_RS26450	92.0258	18.8304	2.289	9.5172e-45	4.8963e-45	AVR78_RS26450	class II histone deacetylase
AVR78_RS26455	24.3087	4.18454	2.5383	2.2601e-13	3.7108e-14	AVR78_RS26455	DUF3156 domain-containing protein
AVR78_RS26460	81.6077	30.6866	1.4111	1.6847e-33	5.9791e-34	AVR78_RS26460	APC family permease
AVR78_RS26465	55.5627	7.32294	2.9236	1.3631e-29	4.1536e-30	AVR78_RS26465	hypothetical protein
AVR78_RS26470	67.7171	11.8562	2.5139	2.4153e-34	8.8457e-35	AVR78_RS26470	cupin domain-containing protein
AVR78_RS26475	114.598	10.4613	3.4534	5.9682e-61	5.2568e-61	AVR78_RS26475	FAD-binding oxidoreductase
AVR78_RS26480	199.679	69.0449	1.5321	5.589e-82	8.3817e-82	AVR78_RS26480	aldehyde dehydrogenase
AVR78_RS26485	74.6624	13.5997	2.4568	1.9408e-37	7.8607e-38	AVR78_RS26485	periplasmic protein
AVR78_RS26490	128.489	28.943	2.1504	1.6896e-60	1.4685e-60	AVR78_RS26490	TonB-dependent siderophore receptor
AVR78_RS26500	102.444	8.71779	3.5547	7.4745e-55	5.4532e-55	AVR78_RS26500	MFS transporter
AVR78_RS26505	57.2991	16.3894	1.8057	2.7081e-26	7.415e-27	AVR78_RS26505	sugar phosphate isomerase/epimerase
AVR78_RS26510	170.161	8.36907	4.3457	3.9321e-90	7.0762e-90	AVR78_RS26510	gfo/Idh/MocA family oxidoreductase
AVR78_RS26530	97.2348	25.4559	1.9335	1.5532e-44	7.9375e-45	AVR78_RS26530	fimbrial protein
AVR78_RS26535	105.916	31.0353	1.7709	7.9735e-47	4.4406e-47	AVR78_RS26535	hypothetical protein
AVR78_RS26540	171.897	27.1995	2.6599	8.3827e-86	1.369e-85	AVR78_RS26540	hypothetical protein
AVR78_RS26545	20.836	5.23067	1.994	7.1307e-11	1.0617e-11	AVR78_RS26545	hypothetical protein
AVR78_RS26555	19.0997	8.71779	1.1315	2.3141e-08	3.0826e-09	AVR78_RS26555	RmbA
AVR78_RS26565	114.598	32.0815	1.8368	3.3242e-51	2.0983e-51	AVR78_RS26565	NUDIX hydrolase
AVR78_RS26580	57.2991	7.32294	2.968	1.4551e-30	4.6053e-31	AVR78_RS26580	MFS transporter
AVR78_RS26590	79.8714	30.3379	1.3966	1.0746e-32	3.7217e-33	AVR78_RS26590	hypothetical protein
AVR78_RS26595	298.65	102.172	1.5474	3.8983e-122	1.1468e-121	AVR78_RS26595	hypothetical protein
AVR78_RS26615	31.254	11.5075	1.4415	6.5838e-14	1.112e-14	AVR78_RS26615	PTS mannose/fructose/sorbose/N-acetylgalactosamine transporter subunit IIC
AVR78_RS26620	22.5724	8.71779	1.3725	2.8172e-10	4.0924e-11	AVR78_RS26620	PTS mannose transporter subunit IIB
AVR78_RS26660	22.5724	2.78969	3.0164	4.998e-13	8.0875e-14	AVR78_RS26660	hypothetical protein
AVR78_RS26665	227.46	91.7111	1.3104	1.2393e-87	2.122e-87	AVR78_RS26665	Mg2+ transport ATPase P-type 1
AVR78_RS26670	39.9357	13.5997	1.5541	7.9159e-18	1.5685e-18	AVR78_RS26670	efflux RND transporter periplasmic adaptor subunit
AVR78_RS26675	243.087	48.4709	2.3263	8.6851e-116	2.3445e-115	AVR78_RS26675	hydrophobe/amphiphile efflux-1 family RND transporter
AVR78_RS26690	125.016	36.6147	1.7716	5.9096e-55	4.3275e-55	AVR78_RS26690	peptide ABC transporter substrate-binding protein
AVR78_RS26695	43.4084	4.53325	3.2594	5.8627e-24	1.467e-24	AVR78_RS26695	ABC transporter permease
AVR78_RS26700	29.5177	3.1384	3.2335	8.9273e-17	1.6845e-17	AVR78_RS26700	ABC transporter permease
AVR78_RS26705	83.3441	3.48711	4.579	8.0857e-45	4.1691e-45	AVR78_RS26705	ABC transporter ATP-binding protein
AVR78_RS26710	45.1447	8.36907	2.4314	3.1824e-23	7.6387e-24	dppD	ABC transporter ATP-binding protein
AVR78_RS26715	168.424	5.57938	4.9159	1.484e-87	2.5152e-87	AVR78_RS26715	Zn-dependent hydrolase
AVR78_RS26720	104.18	17.0869	2.6081	1.9131e-52	1.2723e-52	AVR78_RS26720	EamA/RhaT family transporter
AVR78_RS26725	151.061	60.3271	1.3243	4.6544e-59	3.8976e-59	AVR78_RS26725	PLP-dependent aminotransferase family protein
AVR78_RS26730	152.797	12.9023	3.5659	6.1938e-81	9.0521e-81	AVR78_RS26730	PLP-dependent aminotransferase family protein
AVR78_RS26735	72.9261	6.27681	3.5383	1.5435e-39	6.6444e-40	AVR78_RS26735	ABC transporter substrate-binding protein
AVR78_RS26740	34.7267	1.04613	5.0529	2.8238e-19	5.9035e-20	AVR78_RS26740	amino acid ABC transporter permease
AVR78_RS26745	65.9807	7.67165	3.1044	2.962e-35	1.1206e-35	AVR78_RS26745	amino acid ABC transporter permease
AVR78_RS26750	161.479	7.67165	4.3957	1.5267e-85	2.4583e-85	AVR78_RS26750	amino acid ABC transporter ATP-binding protein
AVR78_RS26755	76.3987	6.27681	3.6054	2.0639e-41	9.5191e-42	AVR78_RS26755	oxidoreductase
AVR78_RS26760	149.325	9.41521	3.9873	1.3482e-79	1.8979e-79	AVR78_RS26760	aspartate aminotransferase family protein
AVR78_RS26765	6.94534	0	3.3159	5.2724e-05	6.1067e-06	AVR78_RS26765	hypothetical protein
AVR78_RS26770	5.209	0	3.9009	0.00041908	4.6141e-05	AVR78_RS26770	hypothetical protein
AVR78_RS26780	38.1994	12.9023	1.5659	3.627e-17	7.0082e-18	AVR78_RS26780	ABC transporter ATP-binding protein
AVR78_RS26785	39.9357	9.41521	2.0846	9.3037e-20	1.9835e-20	AVR78_RS26785	ABC transporter permease
AVR78_RS26815	98.9711	35.5686	1.4764	5.8077e-41	2.6258e-41	AVR78_RS26815	hypothetical protein
AVR78_RS26820	39.9357	16.3894	1.2849	1.2098e-16	2.2724e-17	AVR78_RS26820	hypothetical protein
AVR78_RS26855	97.2348	25.1072	1.9534	1.0659e-44	5.4713e-45	AVR78_RS26855	LysR family transcriptional regulator
AVR78_RS26865	78.1351	35.5686	1.1354	1.2069e-29	3.6824e-30	AVR78_RS26865	glutathione S-transferase
AVR78_RS26870	128.489	34.1737	1.9107	5.0084e-58	4.0182e-58	AVR78_RS26870	carbohydrate kinase
AVR78_RS26880	39.9357	12.2049	1.7102	1.8812e-18	3.8064e-19	AVR78_RS26880	transketolase
AVR78_RS26900	41.672	19.1791	1.1195	1.7923e-16	3.3394e-17	AVR78_RS26900	ABC transporter permease
AVR78_RS26905	154.534	18.8304	3.0368	7.9193e-80	1.1217e-79	AVR78_RS26905	sugar ABC transporter ATP-binding protein
AVR78_RS26910	29.5177	5.57938	2.4034	1.127e-15	2.0313e-16	AVR78_RS26910	DUF2291 domain-containing protein
AVR78_RS26920	59.0354	14.2972	2.0459	2.9637e-28	8.6848e-29	AVR78_RS26920	enterobactin synthase subunit EntD
AVR78_RS26925	357.685	178.192	1.0053	1.5144e-123	4.5129e-123	AVR78_RS26925	TonB-dependent siderophore receptor
AVR78_RS26930	12.1543	0	4.6034	8.2319e-08	1.0778e-08	AVR78_RS26930	hypothetical protein
AVR78_RS26950	29.5177	13.9485	1.0815	5.7807e-12	8.9985e-13	AVR78_RS26950	iron-enterobactin transporter ATP-binding protein
AVR78_RS26965	147.588	40.1018	1.8798	5.497e-66	5.656e-66	AVR78_RS26965	enterobactin transporter EntS
AVR78_RS26970	81.6077	36.9634	1.1426	5.8377e-31	1.876e-31	AVR78_RS26970	Fe2+-enterobactin ABC transporter substrate-binding protein
AVR78_RS26995	85.0804	35.2199	1.2724	1.6064e-33	5.7058e-34	AVR78_RS26995	proofreading thioesterase EntH
AVR78_RS27020	81.6077	30.3379	1.4276	1.2002e-33	4.2763e-34	AVR78_RS27020	3-oxoacyl-ACP reductase FabG
AVR78_RS27030	79.8714	2.78969	4.8395	1.2826e-42	6.2152e-43	AVR78_RS27030	VOC family protein
AVR78_RS27035	20.836	2.09227	3.3159	2.5042e-12	3.9518e-13	AVR78_RS27035	hypothetical protein
AVR78_RS27040	32.9904	9.0665	1.8634	5.5728e-16	1.0193e-16	AVR78_RS27040	amino acid ABC transporter substrate-binding protein
AVR78_RS27080	81.6077	33.825	1.2706	3.3297e-32	1.131e-32	AVR78_RS27080	hypothetical protein
AVR78_RS27090	38.1994	18.133	1.0749	5.1496e-15	9.0509e-16	AVR78_RS27090	hypothetical protein
AVR78_RS27095	41.672	3.83583	3.4415	3.087e-23	7.4248e-24	AVR78_RS27095	phospholipase D family protein
AVR78_RS27130	13.8907	1.39485	3.3159	1.078e-08	1.461e-09	AVR78_RS27130	hypothetical protein
AVR78_RS27135	93.7621	6.62552	3.8229	1.2948e-50	8.0189e-51	AVR78_RS27135	glycosyl transferase
AVR78_RS27145	100.707	22.3175	2.1739	5.552e-48	3.1808e-48	AVR78_RS27145	SulP family inorganic anion transporter
AVR78_RS27170	6.94534	2.44098	1.5086	0.00036292	4.0083e-05	AVR78_RS27170	mercury transporter MerC
AVR78_RS27175	24.3087	11.8562	1.0358	5.7603e-10	8.2452e-11	AVR78_RS27175	mercury(II) reductase
AVR78_RS27195	3.47267	0	2.3159	0.0063016	0.00065161	AVR78_RS27195	IS6 family transposase IS15DIV
AVR78_RS27215	32.9904	0	6.5639	1.9755e-16	3.6763e-17	AVR78_RS27215	hypothetical protein
AVR78_RS27255	85.0804	10.1126	3.0727	7.1821e-45	3.7074e-45	AVR78_RS27255	klebicin B
AVR78_RS27270	3.47267	0	3.3159	0.00425	0.00044236	AVR78_RS27270	IS66 family transposase
AVR78_RS27280	29.5177	13.5997	1.118	4.2354e-12	6.6314e-13	AVR78_RS27280	hypothetical protein
AVR78_RS27285	64.2444	29.9892	1.0991	2.2197e-24	5.6622e-25	AVR78_RS27285	conjugal transfer protein
AVR78_RS27290	59.0354	5.23067	3.4965	2.7208e-32	9.2554e-33	AVR78_RS27290	type-F conjugative transfer system pilin acetylase TraX
AVR78_RS27295	296.913	121.352	1.2908	3.8515e-113	1.0158e-112	AVR78_RS27295	conjugal transfer nickase/helicase TraI
AVR78_RS27300	31.254	5.23067	2.579	7.8347e-17	1.4888e-17	AVR78_RS27300	conjugal transfer protein TraM
AVR78_RS27305	71.1897	35.5686	1.0011	5.8413e-26	1.5685e-26	AVR78_RS27305	lytic transglycosylase
AVR78_RS27310	31.254	3.48711	3.1639	1.3099e-17	2.57e-18	AVR78_RS27310	antirestriction protein
AVR78_RS27315	50.3537	3.83583	3.7145	6.2076e-28	1.7995e-28	AVR78_RS27315	hypothetical protein
AVR78_RS27320	8.68167	1.39485	2.6379	1.0506e-05	1.2578e-06	AVR78_RS27320	parB-like nuclease domain-containing protein
AVR78_RS27330	36.463	0	6.7083	9.6558e-18	1.905e-18	AVR78_RS27330	single-stranded DNA-binding protein
AVR78_RS27340	10.418	1.04613	3.3159	7.3489e-07	9.2828e-08	AVR78_RS27340	hypothetical protein
AVR78_RS27345	41.672	6.27681	2.731	3.0074e-22	7.002e-23	AVR78_RS27345	hypothetical protein
AVR78_RS27360	41.672	1.04613	5.3159	1.7386e-22	4.0916e-23	AVR78_RS27360	hypothetical protein
AVR78_RS27380	86.8167	34.5224	1.3304	9.5139e-35	3.5266e-35	AVR78_RS27380	translesion error-prone DNA polymerase V subunit UmuC
AVR78_RS27390	13.8907	2.09227	2.731	2.1384e-08	2.8568e-09	AVR78_RS27390	hypothetical protein
AVR78_RS27430	29.5177	13.5997	1.118	4.2354e-12	6.6314e-13	AVR78_RS27430	istB-like ATP-binding family protein
AVR78_RS27440	39.9357	6.97423	2.5176	6.1883e-21	1.3785e-21	AVR78_RS27440	hypothetical protein
AVR78_RS27455	105.916	8.36907	3.6617	8.4617e-57	6.5153e-57	AVR78_RS27455	fimbrial biogenesis outer membrane usher protein
AVR78_RS27460	83.3441	18.8304	2.146	7.7257e-40	3.3765e-40	AVR78_RS27460	fimbrial protein
AVR78_RS27465	147.588	25.4559	2.5355	6.0365e-73	7.2707e-73	AVR78_RS27465	type 1 fimbrial protein
AVR78_RS27475	41.672	15.692	1.409	6.903e-18	1.3696e-18	AVR78_RS27475	LuxR family transcriptional regulator
AVR78_RS27480	225.724	53.7016	2.0715	1.665e-103	3.8014e-103	AVR78_RS27480	PilZ domain-containing protein
AVR78_RS27490	118.071	9.41521	3.6485	4.328e-63	4.0451e-63	lacY	MFS transporter
AVR78_RS27525	45.1447	10.1126	2.1584	2.2082e-22	5.1729e-23	AVR78_RS27525	PadR family transcriptional regulator
AVR78_RS27540	50.3537	22.6662	1.1516	8.8588e-20	1.8935e-20	AVR78_RS27540	arsenical efflux pump membrane protein ArsB
AVR78_RS27545	22.5724	10.1126	1.1584	1.0531e-09	1.4925e-10	AVR78_RS27545	arsenate reductase (glutaredoxin)
AVR78_RS27550	34.7267	8.02036	2.1143	1.8279e-17	3.5605e-18	AVR78_RS27550	hypothetical protein
AVR78_RS27560	8.68167	0	4.118	5.2625e-06	6.4177e-07	AVR78_RS27560	IS66 family insertion sequence hypothetical protein
AVR78_RS27565	26.045	2.09227	3.6379	3.4515e-15	6.1155e-16	AVR78_RS27565	ferric citrate ABC transporter ATP-binding protein FecE
AVR78_RS27570	24.3087	4.88196	2.3159	4.9261e-13	7.9766e-14	fecD	Fe(3+) dicitrate ABC transporter permease FecD
AVR78_RS27575	27.7814	1.39485	4.3159	4.0723e-16	7.4931e-17	fecC	Fe(3+) dicitrate ABC transporter permease FecC
AVR78_RS27580	22.5724	1.04613	4.4314	2.3872e-13	3.9138e-14	fecB	Fe(3+) dicitrate ABC transporter substrate-binding protein FecB
AVR78_RS27585	88.5531	6.62552	3.7404	7.5309e-48	4.2985e-48	AVR78_RS27585	TonB-dependent siderophore receptor
AVR78_RS27590	39.9357	9.41521	2.0846	9.3037e-20	1.9835e-20	AVR78_RS27590	fec operon regulator FecR
AVR78_RS27620	32.9904	9.0665	1.8634	5.5728e-16	1.0193e-16	AVR78_RS27620	amino acid ABC transporter
AVR78_RS27625	22.5724	1.39485	4.0164	2.0624e-13	3.3923e-14	AVR78_RS27625	amino acid ABC transporter permease
AVR78_RS27640	45.1447	8.02036	2.4928	2.1636e-23	5.2422e-24	AVR78_RS27640	EamA/RhaT family transporter
AVR78_RS27645	79.8714	11.1588	2.8395	1.63e-41	7.5557e-42	AVR78_RS27645	hypothetical protein
AVR78_RS27655	69.4534	17.4356	1.994	1.1819e-32	4.0871e-33	AVR78_RS27655	hypothetical protein
AVR78_RS27660	109.389	49.8657	1.1333	8.5159e-41	3.8313e-41	AVR78_RS27660	hypothetical protein
AVR78_RS27675	10.418	4.18454	1.3159	2.1365e-05	2.525e-06	AVR78_RS27675	hypothetical protein
AVR78_RS27680	90.2894	14.6459	2.6241	9.14e-46	4.8942e-46	AVR78_RS27680	hypothetical protein
AVR78_RS27700	19.0997	1.39485	3.7754	1.4688e-11	2.2453e-12	AVR78_RS27700	hypothetical protein
AVR78_RS27730	182.315	56.84	1.6815	9.5817e-78	1.2672e-77	AVR78_RS27730	HNH endonuclease
AVR78_RS27755	48.6174	10.1126	2.2653	2.3521e-24	5.9865e-25	AVR78_RS27755	hypothetical protein
AVR78_RS27760	15.627	4.18454	1.9009	2.211e-08	2.9513e-09	AVR78_RS27760	periplasmic copper-binding protein
AVR78_RS27765	98.9711	20.9227	2.2419	1.1398e-47	6.4497e-48	AVR78_RS27765	efflux RND transporter periplasmic adaptor subunit
AVR78_RS27770	250.032	27.5482	3.1821	3.9499e-129	1.2588e-128	AVR78_RS27770	CusA/CzcA family heavy metal efflux RND transporter
AVR78_RS27780	295.177	140.879	1.0671	1.3706e-104	3.1928e-104	AVR78_RS27780	copper-translocating P-type ATPase
AVR78_RS27790	60.7717	10.8101	2.491	6.5082e-31	2.09e-31	AVR78_RS27790	peptidase M23
AVR78_RS27795	20.836	5.23067	1.994	7.1307e-11	1.0617e-11	AVR78_RS27795	copper resistance protein
AVR78_RS27800	189.261	93.4547	1.018	1.4386e-66	1.5176e-66	AVR78_RS27800	multicopper oxidase PcoA
AVR78_RS27805	78.1351	7.32294	3.4155	4.5675e-42	2.1609e-42	AVR78_RS27805	copper resistance protein B
AVR78_RS27810	6.94534	0	4.3159	4.738e-05	5.5059e-06	AVR78_RS27810	copper resistance system chaperone PcoC
AVR78_RS27825	114.598	38.707	1.5659	3.1692e-48	1.8248e-48	AVR78_RS27825	sensor histidine kinase
AVR78_RS27830	55.5627	7.67165	2.8565	1.9437e-29	5.8953e-30	AVR78_RS27830	hypothetical protein
AVR78_RS27835	29.5177	0	5.4034	2.674e-16	4.9539e-17	AVR78_RS27835	IS66 family transposase
AVR78_RS27850	8.68167	2.78969	1.6379	5.0811e-05	5.8926e-06	AVR78_RS27850	IS5/IS1182 family transposase
AVR78_RS27860	31.254	1.74356	4.1639	5.668e-18	1.1299e-18	AVR78_RS27860	IS3 family transposase
AVR78_RS27875	102.444	8.02036	3.675	5.195e-55	3.8205e-55	AVR78_RS27875	hypothetical protein
AVR78_RS27880	32.9904	2.78969	3.5639	8.5349e-19	1.7532e-19	AVR78_RS27880	N-acetyltransferase
AVR78_RS27890	62.5081	4.88196	3.6785	3.0009e-34	1.0929e-34	AVR78_RS27890	arsenical efflux pump membrane protein ArsB
AVR78_RS27895	76.3987	12.2049	2.6461	4.4188e-39	1.8758e-39	AVR78_RS27895	arsenical pump-driving ATPase
AVR78_RS27900	5.209	2.44098	1.0935	0.0037507	0.00039252	AVR78_RS27900	arsenical resistance operon transcriptional repressor ArsD
AVR78_RS27950	22.5724	5.57938	2.0164	1.0614e-11	1.6301e-12	AVR78_RS27950	hypothetical protein
AVR78_RS27970	52.09	15.692	1.731	1.0919e-23	2.6997e-24	AVR78_RS27970	PfkB domain-containing protein
AVR78_RS27975	31.254	12.2049	1.3566	1.3014e-13	2.163e-14	AVR78_RS27975	SIS domain-containing protein
AVR78_RS27980	64.2444	13.5997	2.24	1.54e-31	5.0697e-32	AVR78_RS27980	ABC transporter substrate-binding protein
AVR78_RS28015	38.1994	12.9023	1.5659	3.627e-17	7.0082e-18	AVR78_RS28015	DeoR/GlpR transcriptional regulator
AVR78_RS28030	630.29	272.344	1.2106	4.7017e-232	3.0823e-231	AVR78_RS28030	conjugal transfer protein TrbC
AVR78_RS28055	251.769	96.2444	1.3873	5.7602e-99	1.2181e-98	AVR78_RS28055	CPBP family intramembrane metalloprotease
AVR78_RS28080	57.2991	16.3894	1.8057	2.7081e-26	7.415e-27	AVR78_RS28080	hypothetical protein
AVR78_RS28085	8.68167	1.39485	2.6379	1.0506e-05	1.2578e-06	AVR78_RS28085	hypothetical protein
AVR78_RS28090	137.17	22.3175	2.6197	1.4646e-68	1.6235e-68	AVR78_RS28090	hypothetical protein
AVR78_RS28095	12.1543	1.04613	3.5383	7.8115e-08	1.0242e-08	AVR78_RS28095	transcriptional regulator
AVR78_RS28100	361.158	121.7	1.5693	4.2925e-148	1.7907e-147	AVR78_RS28100	hypothetical protein
AVR78_RS28115	272.605	41.1479	2.7279	7.4517e-136	2.6104e-135	AVR78_RS28115	hypothetical protein
AVR78_RS28125	236.142	103.567	1.1891	1.4545e-87	2.4813e-87	AVR78_RS28125	hypothetical protein
AVR78_RS28130	5.209	1.74356	1.579	0.0018333	0.00019488	AVR78_RS28130	XRE family transcriptional regulator
AVR78_RS28145	10.418	4.18454	1.3159	2.1365e-05	2.525e-06	AVR78_RS28145	hypothetical protein
AVR78_RS28295	373.312	176.099	1.084	1.53e-132	5.125e-132	AVR78_RS28295	plasmid transfer ATPase TraJ
AVR78_RS28300	22.5724	4.53325	2.3159	3.2976e-12	5.1806e-13	AVR78_RS28300	hypothetical protein
AVR78_RS28305	588.618	106.357	2.4684	9.2803e-283	8.0354e-282	AVR78_RS28305	hypothetical protein
AVR78_RS28310	796.978	192.14	2.0524	0	0	AVR78_RS28310	hypothetical protein
AVR78_RS28315	237.878	50.9119	2.2241	1.1086e-111	2.8742e-111	AVR78_RS28315	hypothetical protein
AVR78_RS28330	390.675	143.32	1.4467	5.1076e-155	2.2979e-154	AVR78_RS28330	conjugal transfer protein
AVR78_RS28340	184.052	41.4967	2.149	7.7106e-86	1.2637e-85	AVR78_RS28340	conjugal transfer protein TraN
AVR78_RS28345	725.788	250.375	1.5355	4.8086e-293	4.5034e-292	AVR78_RS28345	hypothetical protein
AVR78_RS28380	144.116	41.4967	1.7962	2.1264e-63	2.0287e-63	AVR78_RS28380	hypothetical protein
AVR78_RS28385	724.052	251.421	1.526	1.2269e-291	1.126e-290	AVR78_RS28385	hypothetical protein
AVR78_RS28405	39.9357	5.92809	2.752	1.9875e-21	4.4997e-22	AVR78_RS28405	IS110 family transposase
AVR78_RS28415	3828.62	2.44098	10.615	0	0	AVR78_RS28415	integrase
AVR78_RS28445	6.94534	0	3.3159	5.2724e-05	6.1067e-06	AVR78_RS28445	quaternary ammonium compound efflux SMR transporter QacE delta 1
AVR78_RS28455	22.5724	0	5.0164	4.3839e-13	7.1214e-14	AVR78_RS28455	hypothetical protein
AVR78_RS28465	19.0997	2.09227	3.1904	2.3362e-11	3.5335e-12	AVR78_RS28465	resolvase
AVR78_RS28475	19.0997	8.36907	1.1904	1.6793e-08	2.2586e-09	AVR78_RS28475	glutathione S-transferase
AVR78_RS28480	46.881	5.23067	3.1639	1.2802e-25	3.3998e-26	AVR78_RS28480	DUF3330 domain-containing protein
AVR78_RS28485	12.1543	1.39485	3.1233	1.0329e-07	1.3454e-08	AVR78_RS28485	hypothetical protein
AVR78_RS28520	17.3633	7.32294	1.2456	5.7111e-08	7.5182e-09	AVR78_RS28520	methionine synthase
AVR78_RS28530	60.7717	28.943	1.0702	6.2528e-23	1.486e-23	AVR78_RS28530	molybdate ABC transporter ATP-binding protein ModF
AVR78_RS28540	22.5724	0	5.0164	4.3839e-13	7.1214e-14	AVR78_RS28540	hypothetical protein
AVR78_RS28545	45.1447	3.1384	3.8465	2.9526e-25	7.7558e-26	AVR78_RS28545	hypothetical protein
AVR78_RS28560	19.0997	0	5.7754	8.3167e-11	1.2355e-11	AVR78_RS28560	hypothetical protein
AVR78_RS28575	8.68167	2.09227	2.0529	2.3403e-05	2.7594e-06	AVR78_RS28575	hypothetical protein
AVR78_RS28600	189.261	90.3163	1.0673	9.6922e-68	1.054e-67	AVR78_RS28600	flavocytochrome c
AVR78_RS28605	161.479	28.5943	2.4975	2.781e-79	3.8673e-79	lacZ	beta-galactosidase
AVR78_RS28615	67.7171	11.5075	2.5569	1.6481e-34	6.0554e-35	AVR78_RS28615	c-type cytochrome biogenesis protein CcmI
AVR78_RS28625	46.881	23.3637	1.0047	1.1635e-17	2.2915e-18	AVR78_RS28625	hypothetical protein
AVR78_RS28630	331.64	24.7585	3.7436	4.7773e-174	2.3322e-173	AVR78_RS28630	nitrite reductase (NAD(P)H)
AVR78_RS28635	86.8167	29.6405	1.5504	8.0951e-37	3.2275e-37	AVR78_RS28635	hypothetical protein
AVR78_RS28640	22.5724	4.18454	2.4314	2.23e-12	3.5264e-13	AVR78_RS28640	hypothetical protein
AVR78_RS28645	6.94534	1.39485	2.3159	0.00011193	1.2737e-05	AVR78_RS28645	hypothetical protein
AVR78_RS28650	45.1447	3.83583	3.5569	3.9734e-25	1.0366e-25	AVR78_RS28650	hypothetical protein
AVR78_RS28660	12.1543	0	4.1233	7.1122e-08	9.3385e-09	AVR78_RS28660	GGDEF domain-containing protein
AVR78_RS28680	15.627	4.18454	1.9009	2.211e-08	2.9513e-09	AVR78_RS28680	hypothetical protein
AVR78_RS28685	65.9807	16.3894	2.0093	3.4563e-31	1.1209e-31	AVR78_RS28685	hypothetical protein
AVR78_RS28690	10.418	1.39485	2.9009	1.0234e-06	1.285e-07	AVR78_RS28690	hypothetical protein
AVR78_RS28710	20.836	2.78969	2.9009	4.7989e-12	7.4957e-13	AVR78_RS28710	hypothetical protein
AVR78_RS28720	57.2991	17.7843	1.6879	1.1721e-25	3.1217e-26	AVR78_RS28720	hypothetical protein
AVR78_RS28730	48.6174	5.23067	3.2164	1.3972e-26	3.8626e-27	AVR78_RS28730	hypothetical protein
AVR78_RS28735	26.045	0	6.2228	1.0496e-13	1.7515e-14	AVR78_RS28735	hypothetical protein
AVR78_RS28745	3.47267	0	3.3159	0.00425	0.00044236	AVR78_RS28745	hypothetical protein
AVR78_RS28750	12.1543	1.04613	3.5383	7.8115e-08	1.0242e-08	AVR78_RS28750	hypothetical protein
AVR78_RS28755	13.8907	0	5.3159	1.7749e-08	2.3809e-09	AVR78_RS28755	hypothetical protein
AVR78_RS28765	38.1994	10.8101	1.8212	4.0904e-18	8.2041e-19	AVR78_RS28765	transposase
AVR78_RS28775	36.463	13.5997	1.4229	6.713e-16	1.2215e-16	AVR78_RS28775	HAD family hydrolase
AVR78_RS28780	81.6077	5.92809	3.7831	2.9141e-44	1.4793e-44	AVR78_RS28780	lipoprotein
AVR78_RS28790	190.997	64.8603	1.5581	5.2029e-79	7.1916e-79	lacZ	beta-D-galactosidase
AVR78_RS28825	3.47267	1.04613	1.731	0.0095846	0.00097938	AVR78_RS28825	K(+)-transporting ATPase subunit F

## Sheet: KEGG_up
Term	Sample number	Background number	P-value	Corrected P-value	UniGenes	KO
ABC transporters	137	274	9.78495e-10	9.1e-08	AVR78_RS14890 AVR78_RS14895 AVR78_RS08225 AVR78_RS17765 AVR78_RS14370 AVR78_RS14065 AVR78_RS14060 AVR78_RS12210 AVR78_RS18925 AVR78_RS01965 AVR78_RS03715 AVR78_RS01310 AVR78_RS27580 AVR78_RS26290 AVR78_RS19420 AVR78_RS07025 AVR78_RS26355 AVR78_RS26400 AVR78_RS07745 AVR78_RS26690 AVR78_RS22350 AVR78_RS24970 AVR78_RS22355 AVR78_RS26695 AVR78_RS14880 AVR78_RS14885 AVR78_RS25705 AVR78_RS28530 AVR78_R…	kpr:KPR_1775 kpr:KPR_1773 kpr:KPR_2653 kpr:KPR_5105 kpr:KPR_4157 kpr:KPR_1205 kpr:KPR_1206 kpr:KPR_1938 kpr:KPR_0078 kpr:KPR_3610 kpr:KPR_3748 kpr:KPR_3723 kpr:KPR_1098 kpr:KPR_4051 kpr:KPR_0090 kpr:KPR_3817 kpr:KPR_4041 kpr:KPR_4034 kpr:KPR_2549 kpr:KPR_5014 kpr:KPR_0655 kpr:KPR_4438 kpr:KPR_0656 kpr:KPR_3721 kpr:KPR_1777 kpr:KPR_1776 kpr:KPR_4063 kpr:KPR_3821 kpr:KPR_4984 kpr:KPR_2338 kpr:KPR_1…
Phosphotransferase system (PTS)	33	69	0.00453892	0.179081	AVR78_RS16395 AVR78_RS02195 AVR78_RS16390 AVR78_RS14020 AVR78_RS19015 AVR78_RS14025 AVR78_RS21885 AVR78_RS25730 AVR78_RS19780 AVR78_RS26615 AVR78_RS23010 AVR78_RS18855 AVR78_RS23015 AVR78_RS02175 AVR78_RS13795 AVR78_RS03970 AVR78_RS19080 AVR78_RS23095 AVR78_RS06080 AVR78_RS14035 AVR78_RS19260 AVR78_RS14030 AVR78_RS10830 AVR78_RS03050 AVR78_RS26620 AVR78_RS21875 AVR78_RS23000 AVR78_RS03980 AVR78_R…	kpr:KPR_1492 kpr:KPR_1494 kpr:KPR_1494 kpr:KPR_1214 kpr:KPR_0064 kpr:KPR_1213 kpr:KPR_0564 kpr:KPR_1188 kpr:KPR_2459 kpr:KPR_0884 kpr:KPR_0884 kpr:KPR_0341 kpr:KPR_0885 kpr:KPR_1494 kpr:KPR_1253 kpr:KPR_2278 kpr:KPR_0050 kpr:KPR_0901 kpr:KPR_2586 kpr:KPR_1211 kpr:KPR_0021 kpr:KPR_1212 kpr:KPR_1515 kpr:KPR_2167 kpr:KPR_0883 kpr:KPR_0562 kpr:KPR_0882 kpr:KPR_2279 kpr:KPR_2280 kpr:KPR_1252 kpr:KPR_1…
Pentose and glucuronate interconversions	17	28	0.00711676	0.179081	AVR78_RS19870 AVR78_RS14930 AVR78_RS23625 AVR78_RS14940 AVR78_RS18420 AVR78_RS23630 AVR78_RS16260 AVR78_RS22470 AVR78_RS16780 AVR78_RS16255 AVR78_RS10635 AVR78_RS10640 AVR78_RS24780 AVR78_RS04025 AVR78_RS18415 AVR78_RS19880 AVR78_RS05850	kpr:KPR_0170 kpr:KPR_2289 kpr:KPR_0985 kpr:KPR_1765 kpr:KPR_4987 kpr:KPR_0986 kpr:KPR_4724 kpr:KPR_0786 kpr:KPR_4813 kpr:KPR_4723 kpr:KPR_1557 kpr:KPR_1556 kpr:KPR_2289 kpr:KPR_2289 kpr:KPR_4988 kpr:KPR_0172 kpr:KPR_2538
Two-component system	48	118	0.00868174	0.179081	AVR78_RS07270 AVR78_RS10535 AVR78_RS15845 AVR78_RS10260 AVR78_RS23585 AVR78_RS15840 AVR78_RS03510 AVR78_RS27825 AVR78_RS00520 AVR78_RS00535 AVR78_RS20785 AVR78_RS23445 AVR78_RS22575 AVR78_RS06925 AVR78_RS06920 AVR78_RS22550 AVR78_RS04045 AVR78_RS22555 AVR78_RS00045 AVR78_RS27765 AVR78_RS10560 AVR78_RS10565 AVR78_RS27760 AVR78_RS19160 AVR78_RS28600 AVR78_RS19165 AVR78_RS09615 AVR78_RS21140 AVR78_R…	kpr:KPR_2962 kpr:KPR_1574 kpr:KPR_4473 kpr:KPR_0324 kpr:KPR_0978 kpr:KPR_4472 kpr:KPR_2201 kpr:KPR_0805 kpr:KPR_3865 kpr:KPR_3862 kpr:KPR_0321 kpr:KPR_0977 kpr:KPR_0805 kpr:KPR_2929 kpr:KPR_2928 kpr:KPR_0800 kpr:KPR_2293 kpr:KPR_0801 kpr:KPR_3950 kpr:KPR_0800 kpr:KPR_1566 kpr:KPR_1565 kpr:KPR_0801 kpr:KPR_0036 kpr:KPR_2762 kpr:KPR_0035 kpr:KPR_2759 kpr:KPR_0430 kpr:KPR_2911 kpr:KPR_0430 kpr:KPR_3…
Fructose and mannose metabolism	24	48	0.009628	0.179081	AVR78_RS16395 AVR78_RS02195 AVR78_RS16390 AVR78_RS11250 AVR78_RS19870 AVR78_RS14430 AVR78_RS14410 AVR78_RS13810 AVR78_RS02175 AVR78_RS13795 AVR78_RS19770 AVR78_RS25290 AVR78_RS14425 AVR78_RS16380 AVR78_RS22470 AVR78_RS11240 AVR78_RS10640 AVR78_RS03050 AVR78_RS13800 AVR78_RS13805 AVR78_RS18420 AVR78_RS27970 AVR78_RS19880 AVR78_RS19875	kpr:KPR_1492 kpr:KPR_1494 kpr:KPR_1494 kpr:KPR_2058 kpr:KPR_0170 kpr:KPR_4168 kpr:KPR_4165 kpr:KPR_1250 kpr:KPR_1494 kpr:KPR_1253 kpr:KPR_0182 kpr:KPR_4372 kpr:KPR_4167 kpr:KPR_4372 kpr:KPR_0786 kpr:KPR_2060 kpr:KPR_1556 kpr:KPR_2167 kpr:KPR_1252 kpr:KPR_1251 kpr:KPR_4987 kpr:KPR_4044 kpr:KPR_0172 kpr:KPR_0171
Butanoate metabolism	22	47	0.0218997	0.293663	AVR78_RS19175 AVR78_RS20165 AVR78_RS02230 AVR78_RS27020 AVR78_RS02185 AVR78_RS05010 AVR78_RS07990 AVR78_RS07995 AVR78_RS08270 AVR78_RS20550 AVR78_RS13390 AVR78_RS09080 AVR78_RS28600 AVR78_RS04105 AVR78_RS05825 AVR78_RS05295 AVR78_RS04560 AVR78_RS15450 AVR78_RS17835 AVR78_RS07980 AVR78_RS08000 AVR78_RS22665	kpr:KPR_0033 kpr:KPR_0221 kpr:KPR_3507 kpr:KPR_3097 kpr:KPR_3729 kpr:KPR_3090 kpr:KPR_3095 kpr:KPR_3096 kpr:KPR_2663 kpr:KPR_0289 kpr:KPR_0032 kpr:KPR_3202 kpr:KPR_2762 kpr:KPR_2305 kpr:KPR_2533 kpr:KPR_3089 kpr:KPR_3097 kpr:KPR_4624 kpr:KPR_5093 kpr:KPR_3093 kpr:KPR_3097 kpr:KPR_0821
Benzoate degradation	17	33	0.0221037	0.293663	AVR78_RS19035 AVR78_RS05010 AVR78_RS06945 AVR78_RS19040 AVR78_RS18020 AVR78_RS08265 AVR78_RS08270 AVR78_RS06955 AVR78_RS20550 AVR78_RS08275 AVR78_RS06960 AVR78_RS06950 AVR78_RS07365 AVR78_RS07360 AVR78_RS13855 AVR78_RS15205 AVR78_RS05290	kpr:KPR_0060 kpr:KPR_3090 kpr:KPR_2933 kpr:KPR_0059 kpr:KPR_0059 kpr:KPR_2662 kpr:KPR_2663 kpr:KPR_2935 kpr:KPR_0289 kpr:KPR_2664 kpr:KPR_2937 kpr:KPR_2934 kpr:KPR_2986 kpr:KPR_2985 kpr:KPR_0059 kpr:KPR_2541 kpr:KPR_2771
C5-Branched dibasic acid metabolism	11	18	0.0271709	0.315862	AVR78_RS19040 AVR78_RS15450 AVR78_RS19175 AVR78_RS20165 AVR78_RS07990 AVR78_RS23715 AVR78_RS18020 AVR78_RS07995 AVR78_RS23720 AVR78_RS13390 AVR78_RS13855	kpr:KPR_0059 kpr:KPR_4624 kpr:KPR_0033 kpr:KPR_0221 kpr:KPR_3095 kpr:KPR_1001 kpr:KPR_0059 kpr:KPR_3096 kpr:KPR_1002 kpr:KPR_0032 kpr:KPR_0059
Xylene degradation	7	9	0.0337697	0.348954	AVR78_RS08265 AVR78_RS08270 AVR78_RS06955 AVR78_RS08275 AVR78_RS06950 AVR78_RS06960 AVR78_RS06945	kpr:KPR_2662 kpr:KPR_2663 kpr:KPR_2935 kpr:KPR_2664 kpr:KPR_2934 kpr:KPR_2937 kpr:KPR_2933
Sulfur metabolism	18	39	0.0394362	0.366757	AVR78_RS01955 AVR78_RS25095 AVR78_RS06195 AVR78_RS08225 AVR78_RS01950 AVR78_RS12220 AVR78_RS02150 AVR78_RS25110 AVR78_RS25100 AVR78_RS15705 AVR78_RS12210 AVR78_RS25105 AVR78_RS14195 AVR78_RS06205 AVR78_RS01960 AVR78_RS01775 AVR78_RS01965 AVR78_RS06200	kpr:KPR_3612 kpr:KPR_4415 kpr:KPR_3613 kpr:KPR_2653 kpr:KPR_3613 kpr:KPR_1936 kpr:KPR_1937 kpr:KPR_4412 kpr:KPR_4414 kpr:KPR_0191 kpr:KPR_1938 kpr:KPR_4413 kpr:KPR_4109 kpr:KPR_4150 kpr:KPR_3611 kpr:KPR_3650 kpr:KPR_3610 kpr:KPR_4413

## Sheet: PAKPs_KPvsKPs.DEG_down
Supplementary Dataset 2. Significantly differentially expressed genes of K. pneumoniae when statically cocultured with P. aeruginosa on LB agar for 3 days compared to 1 day.
Gene_id	readcount_PAKPs_KP	readcount_KPs	log2.Fold_change.	pvalue	qvalue	Gene_name	Gene_description
AVR78_RS00030	31.254	2208.39	-6.1428	0	0	AVR78_RS00030	methylthioribose kinase
AVR78_RS00130	67.7171	349.06	-2.3659	7.9273e-05	9.1037e-06	AVR78_RS00130	pyridoxal phosphate-dependent aminotransferase
AVR78_RS00140	52.09	111.936	-1.1036	0.0017614	0.00018755	AVR78_RS00140	phosphoadenosine phosphosulfate reductase
AVR78_RS00165	137.17	2683.68	-4.2902	2.8164e-242	1.9583e-241	AVR78_RS00165	universal stress protein UspG
AVR78_RS00205	109.389	239.913	-1.133	1.3297e-05	1.5854e-06	tatE	twin-arginine translocase subunit TatA
AVR78_RS00210	149.325	418.802	-1.4878	0.016146	0.0016221	AVR78_RS00210	lipoyl synthase
AVR78_RS00220	32.9904	77.0652	-1.224	0.037208	0.0036578	AVR78_RS00220	lipoyl(octanoyl) transferase LipB
AVR78_RS00225	60.7717	270.949	-2.1565	0.019537	0.001955	AVR78_RS00225	hypothetical protein
AVR78_RS00230	53.8264	253.513	-2.2357	0.0072287	0.00074478	AVR78_RS00230	serine-type D-Ala-D-Ala carboxypeptidase
AVR78_RS00255	17.3633	111.936	-2.6886	0.0011103	0.00011952	AVR78_RS00255	ribosome silencing factor RsfS
AVR78_RS00270	41.672	84.0395	-1.012	0.0017421	0.00018557	AVR78_RS00270	DNA polymerase III subunit delta
AVR78_RS00285	145.852	585.486	-2.0051	0.032567	0.0032098	AVR78_RS00285	hypothetical protein
AVR78_RS00320	52.09	1406	-4.7544	2.6171e-152	1.1224e-151	AVR78_RS00320	glutamate/aspartate ABC transporter substrate-binding protein
AVR78_RS00330	31.254	268.508	-3.1028	8.7927e-12	1.3577e-12	AVR78_RS00330	magnesium/cobalt transporter CorC
AVR78_RS00475	223.987	499.355	-1.1566	1.6721e-09	2.3531e-10	AVR78_RS00475	ferric iron uptake transcriptional regulator
AVR78_RS00545	166.688	1010.57	-2.5999	2.4808e-19	5.2102e-20	AVR78_RS00545	DUF2517 domain-containing protein
AVR78_RS00595	128.489	1341.14	-3.3837	2.5821e-69	2.9042e-69	AVR78_RS00595	citrate (Si)-synthase
AVR78_RS00610	46.881	364.055	-2.9571	3.9299e-13	6.3952e-14	sdhC	succinate dehydrogenase cytochrome b556 subunit
AVR78_RS00615	6.94534	44.9838	-2.6953	0.037531	0.0036888	AVR78_RS00615	succinate:quinone oxidoreductase subunit D
AVR78_RS00620	158.006	807.616	-2.3537	3.7956e-09	5.2496e-10	AVR78_RS00620	succinate dehydrogenase flavoprotein subunit
AVR78_RS00625	78.1351	585.486	-2.9056	6.4644e-19	1.3369e-19	sdhB	succinate dehydrogenase iron-sulfur subunit
AVR78_RS00630	256.978	2945.22	-3.5187	7.6937e-168	3.5663e-167	AVR78_RS00630	2-oxoglutarate dehydrogenase E1 component
AVR78_RS00635	62.5081	1411.93	-4.4975	8.4202e-140	3.0912e-139	AVR78_RS00635	dihydrolipoyllysine-residue succinyltransferase
AVR78_RS00640	104.18	1487.6	-3.8358	1.0187e-106	2.4867e-106	AVR78_RS00640	succinyl-CoA ligase subunit beta
AVR78_RS00645	107.653	1454.13	-3.7557	3.1592e-99	6.7119e-99	AVR78_RS00645	succinate--CoA ligase subunit alpha
AVR78_RS00650	177.106	2444.12	-3.7866	8.2222e-169	3.8502e-168	AVR78_RS00650	cytochrome bd-I ubiquinol oxidase subunit I
AVR78_RS00670	22.5724	146.459	-2.6979	0.00016863	1.8995e-05	AVR78_RS00670	acyl-CoA thioesterase
AVR78_RS00675	19.0997	268.857	-3.8152	1.9195e-20	4.1885e-21	AVR78_RS00675	Tol-Pal system subunit TolQ
AVR78_RS00680	6.94534	94.8495	-3.7715	5.7248e-08	7.534e-09	AVR78_RS00680	colicin transporter
AVR78_RS00695	118.071	479.478	-2.0218	0.038784	0.0038055	AVR78_RS00695	peptidoglycan-associated lipoprotein
AVR78_RS00700	38.1994	263.277	-2.785	5.4622e-08	7.1988e-09	AVR78_RS00700	cell division protein CpoB
AVR78_RS00775	192.733	817.728	-2.085	0.00082519	8.9523e-05	gpmA	2%2C3-bisphosphoglycerate-dependent phosphoglycerate mutase
AVR78_RS00790	22.5724	136.346	-2.5946	0.0010258	0.00011066	AVR78_RS00790	galactose-1-phosphate uridylyltransferase
AVR78_RS00795	83.3441	360.219	-2.1117	0.016511	0.0016565	AVR78_RS00795	UDP-glucose 4-epimerase GalE
AVR78_RS00845	168.424	463.089	-1.4592	0.0051336	0.00053323	AVR78_RS00845	6-phosphogluconolactonase
AVR78_RS00850	19.0997	168.079	-3.1375	3.646e-08	4.8301e-09	AVR78_RS00850	hypothetical protein
AVR78_RS00860	17.3633	329.184	-4.2448	1.0567e-30	3.3581e-31	AVR78_RS00860	two-component-system connector protein YcgZ
AVR78_RS00865	144.116	1406	-3.2863	1.973e-66	2.0672e-66	AVR78_RS00865	hypothetical protein
AVR78_RS00870	177.106	1298.25	-2.8739	2.9962e-38	1.2398e-38	AVR78_RS00870	helix-turn-helix-type transcriptional regulator
AVR78_RS00890	95.4984	746.242	-2.9661	1.3939e-25	3.6931e-26	AVR78_RS00890	hypothetical protein
AVR78_RS00940	138.907	329.532	-1.2463	3.8286e-05	4.4775e-06	AVR78_RS00940	urocanate hydratase
AVR78_RS00985	43.4084	220.386	-2.344	0.0024317	0.00025653	AVR78_RS00985	branched-chain amino acid ABC transporter ATP-binding protein
AVR78_RS00990	0	20.574	-5.3627	0.00057096	6.2444e-05	AVR78_RS00990	hypothetical protein
AVR78_RS01055	83.3441	171.566	-1.0416	1.8919e-05	2.2411e-06	AVR78_RS01055	BAX inhibitor (BI)-1/YccA family protein
AVR78_RS01075	100.707	621.055	-2.6246	5.0003e-13	8.0884e-14	AVR78_RS01075	membrane protein
AVR78_RS01100	19.0997	286.641	-3.9076	7.412e-23	1.7596e-23	AVR78_RS01100	transcriptional regulator
AVR78_RS01155	32.9904	402.762	-3.6098	4.0257e-26	1.0905e-26	AVR78_RS01155	DksA/TraR family C4-type zinc finger protein
AVR78_RS01180	38.1994	413.223	-3.4353	1.6998e-23	4.1647e-24	glnQ	glutamine ABC transporter ATP-binding protein
AVR78_RS01185	17.3633	355.337	-4.3551	1.3946e-34	5.132e-35	AVR78_RS01185	glutamine ABC transporter permease GlnP
AVR78_RS01190	98.9711	1734.49	-4.1314	4.8687e-146	1.9428e-145	AVR78_RS01190	glutamine ABC transporter substrate-binding protein GlnH
AVR78_RS01195	359.421	954.074	-1.4084	2.4626e-06	3.0436e-07	AVR78_RS01195	DNA starvation/stationary phase protection protein Dps
AVR78_RS01200	64.2444	156.92	-1.2884	0.0094677	0.00096873	AVR78_RS01200	threonine/homoserine exporter RhtA
AVR78_RS01210	934.148	2115.63	-1.1794	1.0946e-32	3.7884e-33	ompX	outer membrane protein X
AVR78_RS01220	29.5177	190.048	-2.6867	2.2164e-05	2.6174e-06	AVR78_RS01220	Mn(2+)-response protein MntS
AVR78_RS01245	55.5627	291.871	-2.3931	0.00017225	1.9393e-05	AVR78_RS01245	L%2CD-transpeptidase
AVR78_RS01290	27.7814	196.325	-2.8211	1.361e-06	1.6976e-07	AVR78_RS01290	glycyl-radical enzyme activating protein
AVR78_RS01345	55.5627	7272.03	-7.0321	0	0	bssR	biofilm formation regulatory protein BssR
AVR78_RS01350	194.47	8093.24	-5.3791	0	0	AVR78_RS01350	PQQ-dependent sugar dehydrogenase
AVR78_RS01360	152.797	1447.5	-3.2439	1.3501e-65	1.3738e-65	AVR78_RS01360	serine-type D-Ala-D-Ala carboxypeptidase
AVR78_RS01405	100.707	202.601	-1.0085	1.0234e-06	1.285e-07	AVR78_RS01405	hypothetical protein
AVR78_RS01465	46.881	244.098	-2.3804	0.00074548	8.1105e-05	AVR78_RS01465	hypothetical protein
AVR78_RS01585	62.5081	126.582	-1.018	0.0001398	1.5817e-05	AVR78_RS01585	arginine ABC transporter substrate-binding protein
AVR78_RS01595	19.0997	102.172	-2.4194	0.021118	0.0021072	AVR78_RS01595	arginine transporter permease subunit ArtQ
AVR78_RS01600	48.6174	242.006	-2.3155	0.0024154	0.00025493	AVR78_RS01600	arginine ABC transporter substrate-binding protein
AVR78_RS01605	62.5081	403.459	-2.6903	5.6009e-10	8.0221e-11	AVR78_RS01605	arginine ABC transporter ATP-binding protein ArtP
AVR78_RS01610	41.672	322.907	-2.954	9.0305e-12	1.393e-12	AVR78_RS01610	lipoprotein
AVR78_RS01615	31.254	179.586	-2.5226	0.00049888	5.4809e-05	AVR78_RS01615	DUF1471 domain-containing protein
AVR78_RS01625	105.916	765.422	-2.8533	1.4021e-22	3.3081e-23	AVR78_RS01625	GGDEF domain-containing protein
AVR78_RS01645	57.2991	288.733	-2.3332	0.00064751	7.0664e-05	AVR78_RS01645	low-specificity L-threonine aldolase
AVR78_RS01675	46.881	366.844	-2.9681	2.1458e-13	3.5282e-14	AVR78_RS01675	aquaporin Z
AVR78_RS01685	69.4534	178.889	-1.3649	0.0214	0.0021335	AVR78_RS01685	macrolide transporter subunit MacA
AVR78_RS01695	269.132	1703.8	-2.6624	2.0564e-35	7.8121e-36	AVR78_RS01695	cold-shock protein
AVR78_RS01700	109.389	700.91	-2.6798	5.7277e-16	1.0468e-16	AVR78_RS01700	ATP-dependent Clp protease adaptor ClpS
AVR78_RS01705	284.759	3659.38	-3.6838	4.0422e-235	2.7279e-234	AVR78_RS01705	ATP-dependent Clp protease ATP-binding subunit ClpA
AVR78_RS01730	88.5531	231.544	-1.3867	0.013564	0.0013747	AVR78_RS01730	thioredoxin-disulfide reductase
AVR78_RS01740	125.016	681.731	-2.4471	6.3265e-10	9.036e-11	AVR78_RS01740	leucine-responsive regulatory protein
AVR78_RS01750	65.9807	460.648	-2.8035	2.9096e-13	4.755e-14	lolA	outer membrane lipoprotein carrier protein LolA
AVR78_RS01755	67.7171	300.938	-2.1519	0.014972	0.0015103	AVR78_RS01755	replication-associated recombination protein A
AVR78_RS01760	161.479	731.945	-2.1804	4.9193e-05	5.7123e-06	AVR78_RS01760	serine--tRNA ligase
AVR78_RS01790	111.125	261.534	-1.2348	0.00017273	1.9438e-05	pflA	pyruvate formate lyase 1-activating protein
AVR78_RS01795	1041.8	2426.68	-1.2199	4.043e-32	1.3692e-32	AVR78_RS01795	formate C-acetyltransferase
AVR78_RS01830	991.447	6929.94	-2.8052	3.4566e-177	1.7242e-176	AVR78_RS01830	30S ribosomal protein S1
AVR78_RS01880	72.9261	148.9	-1.0298	4.9654e-05	5.7644e-06	AVR78_RS01880	tRNA uridine 5-oxyacetic acid(34) methyltransferase CmoM
AVR78_RS01885	78.1351	156.571	-1.0028	1.4745e-05	1.7549e-06	AVR78_RS01885	chromosome partition protein MukF
AVR78_RS01900	279.55	690.797	-1.3052	1.5987e-07	2.0701e-08	AVR78_RS01900	L%2CD-transpeptidase
AVR78_RS01910	62.5081	556.543	-3.1544	4.6889e-24	1.1791e-24	AVR78_RS01910	DUF882 domain-containing protein
AVR78_RS01920	128.489	695.679	-2.4368	7.2429e-10	1.0322e-10	AVR78_RS01920	aspartate/tyrosine/aromatic aminotransferase
AVR78_RS01925	41.672	422.987	-3.3435	2.9631e-22	6.9058e-23	AVR78_RS01925	phosphoporin PhoE
AVR78_RS01930	137.17	553.754	-2.0133	0.031702	0.0031259	AVR78_RS01930	asparagine--tRNA ligase
AVR78_RS01975	126.752	286.641	-1.1772	1.0957e-05	1.3098e-06	AVR78_RS01975	dihydroorotate dehydrogenase (quinone)
AVR78_RS01980	123.28	312.097	-1.3401	0.001199	0.00012886	AVR78_RS01980	cell division protein ZapC
AVR78_RS02010	38.1994	88.224	-1.2076	0.021303	0.0021248	AVR78_RS02010	lipoprotein
AVR78_RS02020	324.695	1333.47	-2.038	0.00025205	2.8095e-05	AVR78_RS02020	ribosome modulation factor
AVR78_RS02025	130.225	373.819	-1.5213	0.04628	0.0045226	AVR78_RS02025	bifunctional 3-hydroxydecanoyl-ACP dehydratase/trans-2-decenoyl-ACP isomerase
AVR78_RS02040	654.598	7222.16	-3.4637	0	0	AVR78_RS02040	porin OmpA
AVR78_RS02060	76.3987	155.874	-1.0288	3.2107e-05	3.7693e-06	AVR78_RS02060	TIGR01666 family membrane protein
AVR78_RS02065	26.045	315.933	-3.6005	1.0507e-20	2.317e-21	AVR78_RS02065	YccF domain-containing protein
AVR78_RS02080	171.897	417.756	-1.2811	1.6847e-05	1.9997e-06	AVR78_RS02080	CoA-binding protein
AVR78_RS02110	26.045	58.2348	-1.1609	0.041131	0.0040306	AVR78_RS02110	sulfurtransferase TusE
AVR78_RS02115	189.261	792.621	-2.0663	0.0019004	0.0002016	AVR78_RS02115	transmembrane protein
AVR78_RS02135	24.3087	49.1683	-1.0163	0.01733	0.0017371	AVR78_RS02135	anti-sigma factor antagonist
AVR78_RS02255	48.6174	100.778	-1.0516	0.0012487	0.00013382	AVR78_RS02255	gamma-glutamyl-gamma-aminobutyrate hydrolase
AVR78_RS02495	5.209	235.38	-5.4978	3.4105e-32	1.1576e-32	AVR78_RS02495	bacteriophage regulatory protein
AVR78_RS02500	67.7171	563.169	-3.056	6.9481e-22	1.5942e-22	AVR78_RS02500	hypothetical protein
AVR78_RS02510	24.3087	183.422	-2.9156	5.5204e-07	7.002e-08	AVR78_RS02510	hypothetical protein
AVR78_RS02515	163.215	759.842	-2.2189	6.9247e-06	8.3979e-07	AVR78_RS02515	NAD(P)H:quinone oxidoreductase
AVR78_RS02590	192.733	548.523	-1.5089	0.011119	0.0011311	putA	trifunctional transcriptional regulator/proline dehydrogenase/L-glutamate gamma-semialdehyde dehydrogenase
AVR78_RS02595	178.842	360.568	-1.0116	8.5871e-11	1.2749e-11	AVR78_RS02595	sodium/proline symporter PutP
AVR78_RS02630	71.1897	850.507	-3.5786	4.4767e-52	2.9306e-52	AVR78_RS02630	phosphate starvation protein PhoH
AVR78_RS02675	38.1994	90.3163	-1.2414	0.02946	0.002908	AVR78_RS02675	molecular chaperone
AVR78_RS02705	154.534	1349.16	-3.1261	3.1603e-54	2.252e-54	mdoG	glucans biosynthesis protein MdoG
AVR78_RS02710	234.405	549.569	-1.2293	3.6673e-08	4.8569e-09	AVR78_RS02710	glucans biosynthesis glucosyltransferase MdoH
AVR78_RS02720	78.1351	180.633	-1.209	0.0010167	0.00010972	AVR78_RS02720	SecY/SecA suppressor protein
AVR78_RS02735	64.2444	281.41	-2.131	0.025627	0.0025411	AVR78_RS02735	lipid A biosynthesis lauroyl acyltransferase
AVR78_RS02755	48.6174	111.239	-1.1941	0.0079631	0.00081842	AVR78_RS02755	N-methyl-L-tryptophan oxidase
AVR78_RS02760	359.421	1418.91	-1.981	0.0027273	0.00028673	bssS	biofilm formation regulatory protein BssS
AVR78_RS02795	81.6077	190.048	-1.2196	0.00096311	0.00010409	AVR78_RS02795	DUF480 domain-containing protein
AVR78_RS02825	256.978	1374.27	-2.419	2.8131e-17	5.4539e-18	AVR78_RS02825	ribonuclease E
AVR78_RS02830	92.0258	238.519	-1.374	0.0094946	0.00097126	AVR78_RS02830	23S rRNA pseudouridine(955/2504/2580) synthase RluC
AVR78_RS02840	300.386	1158.07	-1.9468	0.022705	0.0022577	AVR78_RS02840	23S rRNA accumulation protein YceD
AVR78_RS02870	632.026	1837.36	-1.5396	4.4079e-05	5.1405e-06	AVR78_RS02870	acyl carrier protein
AVR78_RS02875	105.916	1090.07	-3.3634	1.1116e-55	8.3084e-56	AVR78_RS02875	beta-ketoacyl-[acyl-carrier-protein] synthase II
AVR78_RS02905	491.383	1492.83	-1.6031	0.0081784	0.00084018	AVR78_RS02905	PTS glucose transporter subunit IIBC
AVR78_RS02910	26.045	155.874	-2.5813	0.0005368	5.8848e-05	AVR78_RS02910	histidine triad nucleotide-binding protein
AVR78_RS02915	5.209	44.2864	-3.0878	0.0060058	0.000622	AVR78_RS02915	DUF1425 domain-containing protein
AVR78_RS02975	102.444	674.059	-2.718	2.0634e-16	3.8351e-17	AVR78_RS02975	DUF1471 domain-containing protein
AVR78_RS02985	197.942	780.067	-1.9785	0.02809	0.0027775	AVR78_RS02985	transcription-repair coupling factor
AVR78_RS03025	92.0258	549.569	-2.5782	9.2315e-11	1.367e-11	AVR78_RS03025	SorC family transcriptional regulator
AVR78_RS03100	213.569	987.202	-2.2086	5.2742e-07	6.6952e-08	AVR78_RS03100	peptidase T
AVR78_RS03130	55.5627	248.631	-2.1618	0.023485	0.0023328	AVR78_RS03130	adenylosuccinate lyase
AVR78_RS03135	13.8907	104.962	-2.9177	0.00014869	1.681e-05	AVR78_RS03135	lysogenization protein HflD
AVR78_RS03140	83.3441	425.777	-2.3529	1.9245e-05	2.2775e-06	AVR78_RS03140	tRNA 2-thiouridine(34) synthase MnmA
AVR78_RS03155	223.987	2384.49	-3.4122	7.7607e-125	2.3743e-124	AVR78_RS03155	isocitrate dehydrogenase (NADP(+))
AVR78_RS03250	442.765	4139.9	-3.225	1.0939e-180	5.5779e-180	AVR78_RS03250	hypothetical protein
AVR78_RS03255	359.421	3143.98	-3.1288	2.5405e-124	7.6197e-124	AVR78_RS03255	hypothetical protein
AVR78_RS03465	118.071	714.51	-2.5973	4.7761e-14	8.1146e-15	AVR78_RS03465	GntR family transcriptional regulator
AVR78_RS03550	152.797	1750.18	-3.5178	1.9169e-100	4.2088e-100	AVR78_RS03550	LysR family transcriptional regulator
AVR78_RS03560	121.543	259.093	-1.092	1.2272e-06	1.5342e-07	AVR78_RS03560	HD domain-containing protein
AVR78_RS03580	60.7717	130.069	-1.0978	0.00066347	7.2337e-05	AVR78_RS03580	leucine efflux protein
AVR78_RS03605	67.7171	345.922	-2.3529	0.00011748	1.3351e-05	AVR78_RS03605	sensor domain-containing diguanylate cyclase
AVR78_RS03760	177.106	1178.64	-2.7344	2.8806e-28	8.4466e-29	AVR78_RS03760	hypothetical protein
AVR78_RS03765	229.196	4275.55	-4.2215	0	0	AVR78_RS03765	PrkA family serine protein kinase
AVR78_RS03770	225.724	659.065	-1.5459	0.017457	0.0017495	AVR78_RS03770	MipA/OmpV family protein
AVR78_RS03785	2040.19	4147.57	-1.0236	6.329e-104	1.4595e-103	AVR78_RS03785	glyceraldehyde-3-phosphate dehydrogenase
AVR78_RS03795	69.4534	142.972	-1.0416	9.4394e-05	1.0784e-05	AVR78_RS03795	DUF1315 domain-containing protein
AVR78_RS03820	114.598	304.076	-1.4079	0.00773	0.00079554	AVR78_RS03820	signal peptide peptidase SppA
AVR78_RS03825	57.2991	333.019	-2.539	1.3583e-06	1.6948e-07	AVR78_RS03825	NAD(P)H nitroreductase
AVR78_RS03835	98.9711	681.033	-2.7826	2.6277e-18	5.2982e-19	AVR78_RS03835	phosphatase PAP2 family protein
AVR78_RS03840	130.225	298.497	-1.1967	1.5201e-05	1.8086e-06	AVR78_RS03840	selenide%2C water dikinase SelD
AVR78_RS03930	72.9261	326.045	-2.1606	0.0096944	0.00099016	AVR78_RS03930	succinylglutamate-semialdehyde dehydrogenase
AVR78_RS03940	69.4534	148.202	-1.0935	0.00025213	2.8097e-05	AVR78_RS03940	succinylglutamate desuccinylase
AVR78_RS03955	39.9357	483.663	-3.5983	8.7482e-31	2.7879e-31	AVR78_RS03955	excinuclease Cho
AVR78_RS03960	90.2894	209.576	-1.2148	0.00046665	5.1341e-05	AVR78_RS03960	ammonia-dependent NAD(+) synthetase
AVR78_RS03965	698.007	3497.92	-2.3252	9.1457e-32	3.0613e-32	AVR78_RS03965	DNA-binding transcriptional activator OsmE
AVR78_RS04005	185.788	389.859	-1.0693	6.6579e-10	9.4975e-11	AVR78_RS04005	catalase HPII
AVR78_RS04020	8.68167	134.603	-3.9546	8.1005e-12	1.2529e-12	AVR78_RS04020	hypothetical protein
AVR78_RS04065	130.225	1287.44	-3.3054	4.3826e-62	3.9512e-62	AVR78_RS04065	outer membrane protein OmpW
AVR78_RS04095	76.3987	168.428	-1.1405	0.00031615	3.5036e-05	AVR78_RS04095	LysR family transcriptional regulator
AVR78_RS04115	26.045	56.4913	-1.117	0.029837	0.0029433	AVR78_RS04115	tryptophan synthase subunit alpha
AVR78_RS04140	38.1994	186.212	-2.2853	0.011516	0.0011708	AVR78_RS04140	5'-3' exoribonuclease
AVR78_RS04145	88.5531	847.717	-3.259	1.0182e-39	4.4124e-40	AVR78_RS04145	hypothetical protein
AVR78_RS04155	76.3987	179.586	-1.2331	0.0017882	0.0001903	AVR78_RS04155	transcriptional regulator GcvA
AVR78_RS04160	107.653	449.14	-2.0608	0.021669	0.0021589	AVR78_RS04160	23S rRNA pseudouridine(2605) synthase RluB
AVR78_RS04185	119.807	280.015	-1.2248	7.3176e-05	8.4289e-06	AVR78_RS04185	hypothetical protein
AVR78_RS04200	284.759	700.213	-1.2981	8.1684e-08	1.0701e-08	AVR78_RS04200	type I DNA topoisomerase
AVR78_RS04205	121.543	7984.45	-6.0376	0	0	AVR78_RS04205	LysR family transcriptional regulator CysB
AVR78_RS04210	258.714	1711.82	-2.7261	9.6807e-40	4.199e-40	AVR78_RS04210	YmiA family putative membrane protein
AVR78_RS04220	381.994	3408.65	-3.1576	6.1778e-139	2.25e-138	AVR78_RS04220	aconitate hydratase AcnA
AVR78_RS04225	130.225	697.772	-2.4217	1.4829e-09	2.0913e-10	AVR78_RS04225	GTP cyclohydrolase II
AVR78_RS04235	19.0997	194.232	-3.3462	4.6335e-11	6.9488e-12	AVR78_RS04235	DUF1049 domain-containing protein
AVR78_RS04240	151.061	351.85	-1.2198	7.1323e-06	8.6451e-07	AVR78_RS04240	lipopolysaccharide assembly protein LapB
AVR78_RS04255	399.357	909.439	-1.1873	1.4922e-14	2.586e-15	AVR78_RS04255	osmotically-inducible lipoprotein OsmB
AVR78_RS04275	125.016	355.686	-1.5085	0.040548	0.0039742	AVR78_RS04275	exoribonuclease II
AVR78_RS04290	86.8167	459.253	-2.4032	1.7479e-06	2.1702e-07	AVR78_RS04290	enoyl-ACP reductase FabI
AVR78_RS04360	41.672	605.363	-3.8606	3.619e-45	1.8915e-45	AVR78_RS04360	XRE family transcriptional regulator
AVR78_RS04385	147.588	1572.34	-3.4133	4.9395e-83	7.6065e-83	AVR78_RS04385	phage shock protein PspA
AVR78_RS04425	45.1447	383.583	-3.0869	6.3612e-16	1.1579e-16	AVR78_RS04425	thiol peroxidase
AVR78_RS04435	32.9904	180.284	-2.4502	0.0014153	0.00015126	AVR78_RS04435	murein peptide amidase A
AVR78_RS04535	48.6174	364.055	-2.9046	2.5587e-12	4.0364e-13	AVR78_RS04535	cold-shock protein
AVR78_RS04565	31.254	195.976	-2.6486	3.2481e-05	3.8122e-06	AVR78_RS04565	TetR/AcrR family transcriptional regulator
AVR78_RS04655	41.672	1023.47	-4.6182	1.8685e-106	4.4893e-106	AVR78_RS04655	hypothetical protein
AVR78_RS04685	69.4534	179.935	-1.3734	0.024035	0.0023858	AVR78_RS04685	ATP-dependent RNA helicase DbpA
AVR78_RS04715	72.9261	2871.64	-5.2993	0	0	AVR78_RS04715	universal stress protein UspF
AVR78_RS04750	76.3987	175.053	-1.1962	0.00091341	9.8813e-05	AVR78_RS04750	2-hydroxyacid dehydrogenase
AVR78_RS04780	62.5081	305.123	-2.2873	0.0011723	0.00012605	AVR78_RS04780	transcriptional regulator FeaR
AVR78_RS04785	185.788	1904.31	-3.3575	2.11e-95	4.2099e-95	AVR78_RS04785	phenylacetaldehyde dehydrogenase
AVR78_RS04850	126.752	349.06	-1.4615	0.015911	0.0016005	tynA	primary-amine oxidase
AVR78_RS04885	17.3633	94.5008	-2.4443	0.021851	0.0021761	AVR78_RS04885	phenylacetate-CoA oxygenase subunit PaaI
AVR78_RS04900	10.418	86.8291	-3.0591	0.00015557	1.755e-05	AVR78_RS04900	2%2C3-dehydroadipyl-CoA hydratase
AVR78_RS04905	19.0997	127.28	-2.7364	0.0002851	3.1694e-05	AVR78_RS04905	2-(1%2C2-epoxy-1%2C2-dihydrophenyl)acetyl-CoA isomerase
AVR78_RS04915	0	51.958	-6.6993	2.5337e-09	3.5406e-10	AVR78_RS04915	phenylacetic acid degradation protein PaaD
AVR78_RS04920	118.071	293.964	-1.316	0.00085995	9.322e-05	AVR78_RS04920	3-oxoadipyl-CoA thiolase
AVR78_RS04925	79.8714	473.201	-2.5667	2.8832e-09	4.0168e-10	AVR78_RS04925	phenylacetate--CoA ligase
AVR78_RS04930	38.1994	422.987	-3.469	1.1691e-24	3.0123e-25	AVR78_RS04930	phenylacetic acid degradation operon negative regulatory protein PaaX
AVR78_RS04940	46.881	108.101	-1.2053	0.010457	0.0010659	AVR78_RS04940	GFA family protein
AVR78_RS05005	59.0354	747.637	-3.6627	8.2213e-49	4.8e-49	AVR78_RS05005	FAD-binding monooxygenase
AVR78_RS05025	138.907	5165.11	-5.2166	0	0	AVR78_RS05025	Glu/Leu/Phe/Val dehydrogenase
AVR78_RS05035	60.7717	122.049	-1.006	0.00014067	1.5912e-05	AVR78_RS05035	acetylornithine aminotransferase
AVR78_RS05045	55.5627	118.213	-1.0892	0.00099573	0.00010752	AVR78_RS05045	succinylglutamate-semialdehyde dehydrogenase
AVR78_RS05085	131.961	597.691	-2.1793	0.00025323	2.8213e-05	AVR78_RS05085	type I glyceraldehyde-3-phosphate dehydrogenase
AVR78_RS05090	45.1447	319.42	-2.8228	6.8154e-10	9.719e-11	AVR78_RS05090	YqaE/Pmp3 family membrane protein
AVR78_RS05140	166.688	382.536	-1.1984	1.0563e-06	1.3249e-07	AVR78_RS05140	Mal regulon transcriptional regulator MalI
AVR78_RS05145	72.9261	169.822	-1.2195	0.0018032	0.00019186	AVR78_RS05145	DUF945 domain-containing protein
AVR78_RS05150	71.1897	186.909	-1.3926	0.029143	0.0028779	AVR78_RS05150	mannose-6-phosphate isomerase
AVR78_RS05155	72.9261	323.953	-2.1513	0.011712	0.0011902	AVR78_RS05155	fumarate hydratase
AVR78_RS05205	34.7267	273.39	-2.9768	1.8599e-10	2.7216e-11	AVR78_RS05205	DUF1471 domain-containing protein
AVR78_RS05240	137.17	1429.02	-3.381	1.4726e-73	1.8117e-73	AVR78_RS05240	universal stress protein UspE
AVR78_RS05245	373.312	1902.57	-2.3495	2.5112e-19	5.2717e-20	AVR78_RS05245	transcriptional regulator FNR
AVR78_RS05340	69.4534	1448.55	-4.3824	5.7131e-137	2.0324e-136	AVR78_RS05340	anion permease
AVR78_RS05385	59.0354	454.022	-2.9431	9.8e-16	1.7699e-16	AVR78_RS05385	malate dehydrogenase (quinone)
AVR78_RS05390	67.7171	471.807	-2.8006	1.718e-13	2.8338e-14	AVR78_RS05390	malonate utilization transcriptional regulator
AVR78_RS05440	17.3633	154.13	-3.15	1.0931e-07	1.4231e-08	AVR78_RS05440	hypothetical protein
AVR78_RS05445	17.3633	108.798	-2.6475	0.0019816	0.00020987	AVR78_RS05445	multidrug transporter subunit MdtJ
AVR78_RS05485	53.8264	422.638	-2.973	2.7088e-15	4.8257e-16	AVR78_RS05485	LysR family transcriptional regulator
AVR78_RS05520	67.7171	808.313	-3.5773	1.5565e-49	9.3492e-50	AVR78_RS05520	dimethyl sulfoxide reductase subunit A
AVR78_RS05525	22.5724	451.581	-4.3224	6.772e-43	3.3202e-43	AVR78_RS05525	DUF1161 domain-containing protein
AVR78_RS05530	76.3987	716.951	-3.2303	6.1973e-33	2.166e-33	AVR78_RS05530	YnfC family lipoprotein
AVR78_RS05535	17.3633	517.836	-4.8984	8.345e-60	7.1049e-60	AVR78_RS05535	spermidine N1-acetyltransferase
AVR78_RS05540	100.707	1794.82	-4.1556	7.4498e-153	3.2252e-152	AVR78_RS05540	hypothetical protein
AVR78_RS05555	144.116	947.1	-2.7163	2.3114e-22	5.4062e-23	AVR78_RS05555	fructuronate reductase
AVR78_RS05560	171.897	4365.87	-4.6667	0	0	AVR78_RS05560	UspA domain-containing protein
AVR78_RS05575	121.543	1551.07	-3.6737	4.572e-100	9.8041e-100	AVR78_RS05575	peptidyl-dipeptidase Dcp
AVR78_RS05620	71.1897	360.568	-2.3405	0.00011486	1.3056e-05	AVR78_RS05620	hypothetical protein
AVR78_RS05805	65.9807	367.542	-2.4778	2.3574e-06	2.916e-07	AVR78_RS05805	PhzF family phenazine biosynthesis protein
AVR78_RS05840	90.2894	204.694	-1.1808	0.00022333	2.4942e-05	AVR78_RS05840	sensor domain-containing diguanylate cyclase
AVR78_RS05855	39.9357	233.985	-2.5507	4.086e-05	4.7749e-06	AVR78_RS05855	N-acetyltransferase
AVR78_RS05875	38.1994	82.9933	-1.1194	0.0087392	0.00089619	AVR78_RS05875	hypothetical protein
AVR78_RS05885	17.3633	99.7315	-2.522	0.0095249	0.00097414	AVR78_RS05885	hypothetical protein
AVR78_RS06155	111.125	2465.39	-4.4716	3.3733e-240	2.3105e-239	AVR78_RS06155	phosphoglycerate transporter PgtP
AVR78_RS06250	111.125	246.19	-1.1476	1.7042e-05	2.0219e-06	AVR78_RS06250	EamA family transporter
AVR78_RS06265	60.7717	156.92	-1.3686	0.032804	0.0032325	AVR78_RS06265	NADH:flavin oxidoreductase/NADH oxidase
AVR78_RS06270	140.643	955.469	-2.7642	2.4257e-24	6.167e-25	AVR78_RS06270	hypothetical protein
AVR78_RS06350	15.627	169.474	-3.4389	1.4849e-10	2.184e-11	AVR78_RS06350	transcriptional regulator
AVR78_RS06355	13.8907	104.265	-2.9081	0.00017324	1.9485e-05	AVR78_RS06355	HlyD family secretion protein
AVR78_RS06380	78.1351	2906.51	-5.2172	0	0	AVR78_RS06380	LysR family transcriptional regulator
AVR78_RS06390	72.9261	377.654	-2.3726	3.3773e-05	3.9618e-06	AVR78_RS06390	glycoside hydrolase
AVR78_RS06395	119.807	629.773	-2.3941	3.2721e-08	4.3448e-09	AVR78_RS06395	PTS beta-glucoside transporter subunit EIIBCA
AVR78_RS06415	85.0804	430.659	-2.3396	2.5622e-05	3.0164e-06	AVR78_RS06415	LysR family transcriptional regulator
AVR78_RS06515	43.4084	238.17	-2.4559	0.00021909	2.4499e-05	AVR78_RS06515	GntR family transcriptional regulator
AVR78_RS06535	92.0258	500.052	-2.442	1.4488e-07	1.8786e-08	AVR78_RS06535	sensor domain-containing diguanylate cyclase
AVR78_RS06590	60.7717	2097.5	-5.1091	3.1342e-250	2.283e-249	AVR78_RS06590	diaminobutyrate--2-oxoglutarate transaminase
AVR78_RS06595	52.09	389.859	-2.9039	4.4824e-13	7.2737e-14	AVR78_RS06595	aspartate aminotransferase family protein
AVR78_RS06680	185.788	2076.93	-3.4827	1.4482e-115	3.8638e-115	AVR78_RS06680	catalase/peroxidase HPI
AVR78_RS06705	98.9711	1385.78	-3.8075	8.0153e-98	1.6644e-97	AVR78_RS06705	oxidoreductase alpha (molybdopterin) subunit
AVR78_RS06745	26.045	135.3	-2.3771	0.012475	0.0012662	AVR78_RS06745	TIGR00156 family protein
AVR78_RS06750	6.94534	185.166	-4.7366	1.8848e-21	4.2755e-22	AVR78_RS06750	hypothetical protein
AVR78_RS06755	19.0997	115.423	-2.5953	0.0025025	0.00026382	AVR78_RS06755	DUF421 domain-containing protein
AVR78_RS06855	343.794	3807.58	-3.4693	5.5947e-208	3.2093e-207	AVR78_RS06855	alcohol dehydrogenase AdhP
AVR78_RS06900	55.5627	130.418	-1.231	0.0075184	0.00077394	AVR78_RS06900	polyphosphate kinase 2
AVR78_RS06990	62.5081	137.044	-1.1325	0.00098605	0.00010655	AVR78_RS06990	TetR family transcriptional regulator
AVR78_RS07140	93.7621	426.823	-2.1866	0.0016714	0.00017817	AVR78_RS07140	L-asparagine permease
AVR78_RS07155	107.653	286.641	-1.4129	0.010824	0.0011021	AVR78_RS07155	TonB-dependent receptor
AVR78_RS07160	177.106	881.891	-2.316	6.7586e-09	9.2805e-10	AVR78_RS07160	hypothetical protein
AVR78_RS07175	119.807	807.267	-2.7523	1.956e-20	4.2641e-21	AVR78_RS07175	NADP-dependent oxidoreductase
AVR78_RS07180	45.1447	228.755	-2.3412	0.0021045	0.00022253	AVR78_RS07180	XRE family transcriptional regulator
AVR78_RS07185	13.8907	386.372	-4.7978	8.9841e-44	4.4862e-44	AVR78_RS07185	N-acetyltransferase
AVR78_RS07320	60.7717	128.675	-1.0823	0.00051383	5.6411e-05	AVR78_RS07320	DUF3313 domain-containing protein
AVR78_RS07335	72.9261	1101.93	-3.9175	1.8443e-83	2.8497e-83	AVR78_RS07335	hypothetical protein
AVR78_RS07345	116.334	256.303	-1.1396	8.5691e-06	1.032e-06	mdoD	glucan biosynthesis protein D
AVR78_RS07355	92.0258	225.268	-1.2915	0.0020219	0.00021409	AVR78_RS07355	DUF1338 domain-containing protein
AVR78_RS07370	74.6624	201.555	-1.4327	0.044257	0.0043323	AVR78_RS07370	LysR family transcriptional regulator
AVR78_RS07380	121.543	265.718	-1.1284	3.8321e-06	4.697e-07	AVR78_RS07380	S-(hydroxymethyl)glutathione dehydrogenase/class III alcohol dehydrogenase
AVR78_RS07390	43.4084	216.899	-2.321	0.0037528	0.00039265	AVR78_RS07390	cytochrome b561
AVR78_RS07400	32.9904	463.437	-3.8123	5.3749e-34	1.9391e-34	AVR78_RS07400	hypothetical protein
AVR78_RS07410	27.7814	454.371	-4.0317	1.0757e-37	4.3762e-38	AVR78_RS07410	MFS transporter
AVR78_RS07415	123.28	341.388	-1.4695	0.020369	0.0020347	AVR78_RS07415	adenosine deaminase
AVR78_RS07440	24.3087	257.349	-3.4042	7.4078e-15	1.297e-15	AVR78_RS07440	DUF2569 domain-containing protein
AVR78_RS07455	55.5627	138.438	-1.3171	0.022537	0.002242	AVR78_RS07455	electron transport complex subunit RsxC
AVR78_RS07475	38.1994	467.622	-3.6137	3.8174e-30	1.1893e-30	AVR78_RS07475	endonuclease III
AVR78_RS07485	126.752	1245.25	-3.2963	1.33e-59	1.124e-59	AVR78_RS07485	dipeptide/tripeptide permease DtpA
AVR78_RS07490	45.1447	237.472	-2.3951	0.00067856	7.3965e-05	AVR78_RS07490	glutathione transferase GstA
AVR78_RS07500	158.006	406.946	-1.3649	0.00051776	5.6829e-05	AVR78_RS07500	tyrosine--tRNA ligase
AVR78_RS07515	67.7171	142.623	-1.0746	0.00021366	2.3914e-05	AVR78_RS07515	anhydro-N-acetylmuramic acid kinase
AVR78_RS07520	184.052	493.775	-1.4237	0.0012067	0.00012963	AVR78_RS07520	outer membrane lipoprotein SlyB
AVR78_RS07530	223.987	2236.64	-3.3198	6.0768e-108	1.5156e-107	AVR78_RS07530	transcriptional regulator SlyA
AVR78_RS07535	15.627	285.595	-4.1919	3.0937e-26	8.4305e-27	AVR78_RS07535	DUF1656 domain-containing protein
AVR78_RS07540	34.7267	516.093	-3.8935	1.6647e-39	7.1463e-40	AVR78_RS07540	HlyD family secretion protein
AVR78_RS07545	74.6624	177.843	-1.2521	0.0028074	0.00029508	AVR78_RS07545	FUSC family protein
AVR78_RS07550	27.7814	1797.61	-6.0158	3.1395e-253	2.4012e-252	AVR78_RS07550	superoxide dismutase [Cu-Zn] SodC2
AVR78_RS07555	45.1447	232.939	-2.3673	0.001234	0.00013237	AVR78_RS07555	aldo/keto reductase
AVR78_RS07585	288.232	2624.05	-3.1865	9.8688e-111	2.5443e-110	AVR78_RS07585	glutaredoxin
AVR78_RS07600	95.4984	2708.09	-4.8257	4.4524e-298	4.2567e-297	AVR78_RS07600	superoxide dismutase [Fe]
AVR78_RS07620	60.7717	407.992	-2.7471	5.5067e-11	8.2394e-12	AVR78_RS07620	Bcr/CflA family multidrug efflux MFS transporter
AVR78_RS07625	128.489	598.04	-2.2186	6.7232e-05	7.7559e-06	AVR78_RS07625	cyclopropane-fatty-acyl-phospholipid synthase
AVR78_RS07695	45.1447	358.824	-2.9906	1.749e-13	2.884e-14	AVR78_RS07695	winged helix family transcriptional regulator
AVR78_RS07700	26.045	359.87	-3.7884	2.1657e-26	5.9582e-27	AVR78_RS07700	hypothetical protein
AVR78_RS07705	5.209	40.4505	-2.9571	0.015556	0.0015672	AVR78_RS07705	DUF1471 domain-containing protein
AVR78_RS07710	112.862	487.15	-2.1098	0.0055491	0.00057548	AVR78_RS07710	NAD(P)-dependent alcohol dehydrogenase
AVR78_RS07820	116.334	287.338	-1.3045	0.0007119	7.7525e-05	AVR78_RS07820	phosphotransferase
AVR78_RS07940	178.842	359.87	-1.0088	7.4835e-11	1.1132e-11	AVR78_RS07940	DUF535 domain-containing protein
AVR78_RS08005	50.3537	689.403	-3.7752	1.3411e-48	7.7806e-49	AVR78_RS08005	energy transducer protein TonB
AVR78_RS08020	19.0997	217.945	-3.5123	6.9068e-14	1.164e-14	AVR78_RS08020	hypothetical protein
AVR78_RS08025	62.5081	404.157	-2.6928	4.947e-10	7.0965e-11	AVR78_RS08025	hypothetical protein
AVR78_RS08085	79.8714	687.31	-3.1052	7.8309e-28	2.2587e-28	AVR78_RS08085	GMC family oxidoreductase
AVR78_RS08090	34.7267	2314.4	-6.0584	0	0	AVR78_RS08090	gluconate 2-dehydrogenase
AVR78_RS08110	43.4084	275.831	-2.6677	5.1418e-07	6.5399e-08	AVR78_RS08110	iron ABC transporter substrate-binding protein
AVR78_RS08120	34.7267	81.5985	-1.2325	0.03506	0.0034518	AVR78_RS08120	malate/lactate/ureidoglycolate dehydrogenase
AVR78_RS08135	119.807	283.154	-1.2409	0.00011345	1.2899e-05	AVR78_RS08135	MFS transporter
AVR78_RS08145	90.2894	556.543	-2.6239	8.2024e-12	1.2682e-12	AVR78_RS08145	MFS transporter
AVR78_RS08155	43.4084	103.219	-1.2497	0.022122	0.0022021	AVR78_RS08155	DUF1062 domain-containing protein
AVR78_RS08200	46.881	368.239	-2.9736	1.5832e-13	2.621e-14	AVR78_RS08200	ABC transporter ATP-binding protein
AVR78_RS08235	24.3087	53.3528	-1.1341	0.040373	0.0039596	AVR78_RS08235	LLM class flavin-dependent oxidoreductase
AVR78_RS08315	22.5724	48.4709	-1.1026	0.039234	0.0038488	AVR78_RS08315	molybdate ABC transporter substrate-binding protein
AVR78_RS08340	57.2991	492.729	-3.1042	2.1811e-20	4.7459e-21	AVR78_RS08340	fumarate hydratase FumD
AVR78_RS08360	595.563	5265.54	-3.1443	1.5033e-210	8.8443e-210	AVR78_RS08360	murein lipoprotein
AVR78_RS08380	72.9261	197.022	-1.4338	0.047493	0.0046332	AVR78_RS08380	signal peptide peptidase SppA
AVR78_RS08385	64.2444	135.649	-1.0782	0.00033114	3.6652e-05	AVR78_RS08385	Fe-S cluster assembly ATPase SufC
AVR78_RS08390	137.17	381.49	-1.4757	0.016435	0.0016493	AVR78_RS08390	Fe-S cluster assembly protein SufB
AVR78_RS08425	13.8907	184.12	-3.7285	9.0441e-14	1.5136e-14	AVR78_RS08425	TetR/AcrR family transcriptional regulator
AVR78_RS08465	59.0354	144.715	-1.2936	0.013784	0.0013949	AVR78_RS08465	DUF1852 domain-containing protein
AVR78_RS08475	41.672	266.067	-2.6746	6.9305e-07	8.7688e-08	AVR78_RS08475	hypothetical protein
AVR78_RS08510	250.032	1521.43	-2.6052	1.3751e-28	4.0766e-29	AVR78_RS08510	phosphoenolpyruvate synthase
AVR78_RS08525	52.09	126.582	-1.281	0.017833	0.0017869	AVR78_RS08525	3-deoxy-7-phosphoheptulonate synthase
AVR78_RS08540	32.9904	343.481	-3.3801	6.1287e-19	1.2686e-19	AVR78_RS08540	lipoprotein
AVR78_RS08550	62.5081	159.012	-1.347	0.023094	0.0022954	AVR78_RS08550	glutathione peroxidase
AVR78_RS08570	60.7717	1721.24	-4.8239	4.305e-190	2.2972e-189	AVR78_RS08570	LysR family transcriptional regulator
AVR78_RS08575	69.4534	700.91	-3.3351	1.5667e-35	5.9665e-36	AVR78_RS08575	D-amino acid dehydrogenase
AVR78_RS08590	151.061	356.034	-1.2369	1.278e-05	1.5253e-06	AVR78_RS08590	phenylalanine--tRNA ligase subunit beta
AVR78_RS08605	220.515	1212.47	-2.459	5.5898e-17	1.0702e-17	AVR78_RS08605	50S ribosomal protein L20
AVR78_RS08615	835.177	1900.83	-1.1865	8.3847e-29	2.5034e-29	AVR78_RS08615	translation initiation factor IF-3
AVR78_RS08620	218.778	1273.49	-2.5413	2.7238e-21	6.1334e-22	AVR78_RS08620	threonine--tRNA ligase
AVR78_RS08635	62.5081	818.077	-3.7101	5.6465e-55	4.1459e-55	AVR78_RS08635	6-phosphofructokinase II
AVR78_RS08645	118.071	2313	-4.292	2.925e-209	1.6991e-208	AVR78_RS08645	fructosamine kinase family protein
AVR78_RS08665	100.707	215.155	-1.0952	1.0958e-05	1.3098e-06	AVR78_RS08665	polyisoprenoid-binding protein
AVR78_RS08695	93.7621	247.236	-1.3988	0.013691	0.001386	oppD	oligopeptide ABC transporter ATP-binding protein OppD
AVR78_RS08700	46.881	269.205	-2.5216	2.0639e-05	2.4405e-06	AVR78_RS08700	oligopeptide ABC transporter permease OppC
AVR78_RS08705	52.09	436.587	-3.0672	1.5628e-17	3.0583e-18	oppB	oligopeptide ABC transporter permease OppB
AVR78_RS08710	164.952	4714.93	-4.8371	0	0	AVR78_RS08710	oligopeptide ABC transporter substrate-binding protein OppA
AVR78_RS08730	691.061	3933.12	-2.5088	6.2841e-58	5.024e-58	AVR78_RS08730	bifunctional acetaldehyde-CoA/alcohol dehydrogenase
AVR78_RS08750	182.315	441.469	-1.2759	7.6477e-06	9.2332e-07	AVR78_RS08750	UTP--glucose-1-phosphate uridylyltransferase
AVR78_RS08770	64.2444	155.525	-1.2755	0.0078631	0.00080888	AVR78_RS08770	formyltetrahydrofolate deformylase
AVR78_RS08875	112.862	292.918	-1.3759	0.0042453	0.00044236	AVR78_RS08875	nitrate regulatory protein
AVR78_RS08890	125.016	3964.85	-4.9871	0	0	AVR78_RS08890	transporter
AVR78_RS08895	32.9904	2613.24	-6.3077	0	0	chaB	cation transport regulator
AVR78_RS08900	43.4084	460.648	-3.4076	1.9826e-25	5.2317e-26	AVR78_RS08900	sodium-potassium/proton antiporter ChaA
AVR78_RS08925	36.463	167.033	-2.1956	0.044861	0.0043895	AVR78_RS08925	peptide chain release factor 1
AVR78_RS08940	130.225	329.532	-1.3394	0.00085693	9.2922e-05	AVR78_RS08940	4-(cytidine 5'-diphospho)-2-C-methyl-D-erythritol kinase
AVR78_RS08950	241.351	1014.4	-2.0714	0.00035466	3.9209e-05	AVR78_RS08950	ribose-phosphate pyrophosphokinase
AVR78_RS08965	394.148	4918.23	-3.6413	4.6163e-306	4.5073e-305	AVR78_RS08965	membrane protein
AVR78_RS08975	177.106	964.187	-2.4447	2.3099e-13	3.7912e-14	AVR78_RS08975	redox-regulated ATPase YchF
AVR78_RS09000	83.3441	199.463	-1.259	0.0018129	0.00019284	AVR78_RS09000	DUF2058 domain-containing protein
AVR78_RS09010	60.7717	424.382	-2.8039	2.4315e-12	3.8397e-13	AVR78_RS09010	cold shock domain-containing protein
AVR78_RS09045	62.5081	137.392	-1.1362	0.0010467	0.00011283	AVR78_RS09045	LysR family transcriptional regulator
AVR78_RS09235	92.0258	801.688	-3.1229	8.2117e-33	2.8592e-33	AVR78_RS09235	alanine racemase
AVR78_RS09240	85.0804	1392.4	-4.0326	7.6927e-112	2.0058e-111	AVR78_RS09240	D-amino acid dehydrogenase small subunit
AVR78_RS09250	208.36	1177.95	-2.4991	4.146e-18	8.312e-19	AVR78_RS09250	SpoVR family protein
AVR78_RS09275	32.9904	386.372	-3.5499	4.4391e-24	1.1181e-24	AVR78_RS09275	YcgN family cysteine cluster protein
AVR78_RS09285	41.672	87.8753	-1.0764	0.0037578	0.00039309	AVR78_RS09285	hypothetical protein
AVR78_RS09295	83.3441	198.068	-1.2488	0.0014968	0.00015978	AVR78_RS09295	septum site-determining protein MinC
AVR78_RS09300	62.5081	330.23	-2.4014	5.2795e-05	6.1135e-06	AVR78_RS09300	septum site-determining protein MinD
AVR78_RS09320	48.6174	226.662	-2.221	0.013671	0.0013846	AVR78_RS09320	lipoprotein
AVR78_RS09355	138.907	2328.35	-4.0671	4.1894e-189	2.2098e-188	AVR78_RS09355	L-serine ammonia-lyase
AVR78_RS09395	55.5627	134.603	-1.2765	0.013619	0.0013796	AVR78_RS09395	hypothetical protein
AVR78_RS09410	239.614	1255.36	-2.3893	9.22e-15	1.6094e-15	AVR78_RS09410	cold-shock protein CspC
AVR78_RS09450	154.534	769.257	-2.3155	6.307e-08	8.2931e-09	AVR78_RS09450	protease HtpX
AVR78_RS09455	289.968	877.707	-1.5978	0.036351	0.0035751	AVR78_RS09455	carboxy terminal-processing peptidase
AVR78_RS09460	76.3987	635.004	-3.0551	1.8985e-24	4.8483e-25	AVR78_RS09460	RNA chaperone ProQ
AVR78_RS09490	31.254	64.8603	-1.0533	0.0098085	0.0010016	AVR78_RS09490	DUF1482 domain-containing protein
AVR78_RS09495	38.1994	863.758	-4.499	2.5371e-86	4.1881e-86	AVR78_RS09495	protein-serine/threonine phosphatase
AVR78_RS09515	29.5177	62.0706	-1.0723	0.014233	0.0014384	AVR78_RS09515	DUF2511 domain-containing protein
AVR78_RS09545	265.659	1483.42	-2.4813	1.6358e-21	3.7181e-22	AVR78_RS09545	oligopeptidase B
AVR78_RS09550	83.3441	1918.26	-4.5246	3.5451e-191	1.9139e-190	AVR78_RS09550	DUF533 domain-containing protein
AVR78_RS09555	67.7171	2032.64	-4.9077	9.1869e-230	5.9379e-229	AVR78_RS09555	YebG family protein
AVR78_RS09575	131.961	321.163	-1.2832	0.000173	1.9463e-05	AVR78_RS09575	glucose-6-phosphate dehydrogenase
AVR78_RS09595	109.389	232.242	-1.0862	3.5346e-06	4.3393e-07	AVR78_RS09595	pyruvate kinase
AVR78_RS09635	34.7267	268.508	-2.9508	5.4007e-10	7.7401e-11	AVR78_RS09635	zinc ABC transporter ATP-binding protein ZnuC
AVR78_RS09665	45.1447	97.2905	-1.1077	0.003782	0.00039552	AVR78_RS09665	dihydroneopterin triphosphate diphosphatase
AVR78_RS09695	38.1994	85.783	-1.1671	0.014264	0.0014412	AVR78_RS09695	tRNA 5-methoxyuridine(34)/uridine 5-oxyacetic acid(34) synthase CmoB
AVR78_RS09700	484.437	1225.37	-1.3388	1.1982e-10	1.7668e-11	AVR78_RS09700	copper homeostasis protein CutC
AVR78_RS09725	59.0354	273.041	-2.2095	0.0082381	0.00084612	AVR78_RS09725	universal stress protein UspC
AVR78_RS09735	65.9807	311.748	-2.2403	0.0026487	0.00027866	AVR78_RS09735	trehalose-phosphatase
AVR78_RS09760	76.3987	487.499	-2.6738	1.9035e-11	2.8954e-12	AVR78_RS09760	ferritin
AVR78_RS09795	13.8907	206.786	-3.8959	8.0455e-17	1.5276e-17	AVR78_RS09795	H-type ferritin
AVR78_RS09845	201.415	510.862	-1.3428	3.8473e-05	4.4982e-06	AVR78_RS09845	excinuclease ABC subunit UvrC
AVR78_RS09850	185.788	780.416	-2.0706	0.0017822	0.00018971	AVR78_RS09850	two-component system response regulator UvrY
AVR78_RS09860	86.8167	803.78	-3.2108	5.0975e-36	1.9757e-36	AVR78_RS09860	transcriptional regulator SdiA
AVR78_RS09875	76.3987	353.245	-2.209	0.0026763	0.00028143	AVR78_RS09875	D-cysteine desulfhydrase
AVR78_RS09880	130.225	3506.29	-4.7509	0	0	AVR78_RS09880	cystine ABC transporter substrate-binding protein
AVR78_RS09945	83.3441	412.177	-2.3061	9.7251e-05	1.1102e-05	AVR78_RS09945	phosphoporin PhoE
AVR78_RS10050	109.389	791.924	-2.8559	2.1722e-23	5.2603e-24	AVR78_RS10050	hypothetical protein
AVR78_RS10090	5.209	69.0449	-3.7285	5.0033e-06	6.1113e-07	AVR78_RS10090	oxidoreductase
AVR78_RS10100	88.5531	553.056	-2.6428	3.861e-12	6.0554e-13	AVR78_RS10100	MFS transporter
AVR78_RS10135	55.5627	293.266	-2.4	0.00014313	1.6186e-05	AVR78_RS10135	adenosylcobinamide-GDP ribazoletransferase
AVR78_RS10140	345.531	698.12	-1.0147	2.4685e-19	5.1869e-20	AVR78_RS10140	hypothetical protein
AVR78_RS10145	72.9261	158.315	-1.1183	0.00028483	3.1672e-05	AVR78_RS10145	FUSC family protein
AVR78_RS10150	46.881	207.483	-2.1459	0.046524	0.0045445	AVR78_RS10150	DNA gyrase inhibitor SbmC
AVR78_RS10160	85.0804	188.653	-1.1488	0.00017256	1.9423e-05	AVR78_RS10160	exodeoxyribonuclease I
AVR78_RS10275	105.916	492.729	-2.2179	0.00030337	3.3644e-05	AVR78_RS10275	APC family permease
AVR78_RS10360	29.5177	62.4193	-1.0804	0.01525	0.0015371	AVR78_RS10360	O9 family O-antigen ABC transporter permease subunit Wzm
AVR78_RS10410	55.5627	455.417	-3.035	1.3957e-17	2.7372e-18	AVR78_RS10410	dTDP-glucose 4%2C6-dehydratase
AVR78_RS10425	223.987	1336.26	-2.5767	6.2067e-24	1.5522e-24	AVR78_RS10425	phosphogluconate dehydrogenase (NADP(+)-dependent%2C decarboxylating)
AVR78_RS10655	57.2991	136.346	-1.2507	0.0086824	0.00089096	AVR78_RS10655	NAD(P)-dependent oxidoreductase
AVR78_RS10670	147.588	1562.23	-3.404	7.4105e-82	1.1077e-81	AVR78_RS10670	fructose-bisphosphate aldolase
AVR78_RS10680	32.9904	75.6704	-1.1977	0.029723	0.0029327	AVR78_RS10680	hydroxyethylthiazole kinase
AVR78_RS10685	163.215	332.671	-1.0273	1.1427e-09	1.6174e-10	AVR78_RS10685	MBL fold metallo-hydrolase
AVR78_RS10740	161.479	446.351	-1.4668	0.007434	0.00076542	metG	methionine--tRNA ligase
AVR78_RS10770	46.881	110.89	-1.2421	0.015975	0.0016062	AVR78_RS10770	quaternary amine ABC transporter ATP-binding protein
AVR78_RS10805	85.0804	498.657	-2.5511	2.0646e-09	2.893e-10	AVR78_RS10805	YIP1 family protein
AVR78_RS10810	46.881	421.592	-3.1688	7.0657e-19	1.458e-19	AVR78_RS10810	DedA family protein
AVR78_RS10860	59.0354	312.445	-2.404	7.9153e-05	9.0922e-06	AVR78_RS10860	cytidine deaminase
AVR78_RS10880	111.125	526.554	-2.2444	8.2078e-05	9.4164e-06	AVR78_RS10880	galactose/glucose ABC transporter substrate-binding protein MglB
AVR78_RS10920	98.9711	860.62	-3.1203	5.3235e-35	1.9878e-35	AVR78_RS10920	LysR family transcriptional regulator
AVR78_RS10950	64.2444	494.822	-2.9453	4.6713e-17	8.9656e-18	AVR78_RS10950	bifunctional PTS fructose transporter subunit IIA/HPr protein
AVR78_RS10985	79.8714	190.396	-1.2533	0.0020384	0.00021579	AVR78_RS10985	elongation factor P-like protein YeiP
AVR78_RS11040	22.5724	4520.35	-7.6457	0	0	AVR78_RS11040	hypothetical protein
AVR78_RS11045	3.47267	89.2701	-4.6841	5.901e-11	8.8179e-12	AVR78_RS11045	hypothetical protein
AVR78_RS11055	71.1897	157.966	-1.1499	0.00060203	6.5811e-05	AVR78_RS11055	16S rRNA pseudouridine(516) synthase RsuA
AVR78_RS11060	111.125	475.642	-2.0977	0.0081054	0.00083287	AVR78_RS11060	ATP-dependent helicase
AVR78_RS11065	95.4984	497.263	-2.3805	1.4793e-06	1.8423e-07	AVR78_RS11065	50S ribosomal protein L25
AVR78_RS11115	336.849	1757.51	-2.3834	9.7865e-20	2.084e-20	AVR78_RS11115	ecotin
AVR78_RS11145	48.6174	118.213	-1.2818	0.022308	0.0022201	AVR78_RS11145	bifunctional DNA-binding transcriptional regulator/O6-methylguanine-DNA methyltransferase Ada
AVR78_RS11155	1014.02	17863.8	-4.1389	0	0	AVR78_RS11155	phosphoporin PhoE
AVR78_RS11170	98.9711	862.363	-3.1232	3.5318e-35	1.3296e-35	AVR78_RS11170	transcriptional regulator RcsB
AVR78_RS11180	239.614	1108.55	-2.2099	9.8405e-08	1.2833e-08	AVR78_RS11180	DNA topoisomerase (ATP-hydrolyzing) subunit A
AVR78_RS11190	203.151	482.617	-1.2483	6.9632e-07	8.8077e-08	AVR78_RS11190	ribonucleoside-diphosphate reductase subunit alpha
AVR78_RS11195	69.4534	148.9	-1.1002	0.00028586	3.177e-05	AVR78_RS11195	ribonucleotide-diphosphate reductase subunit beta
AVR78_RS11320	52.09	109.147	-1.0672	0.0010475	0.00011289	AVR78_RS11320	1%2C4-dihydroxy-2-naphthoyl-CoA synthase
AVR78_RS11350	65.9807	564.913	-3.0979	5.5196e-23	1.3138e-23	AVR78_RS11350	NADH-quinone oxidoreductase subunit N
AVR78_RS11355	67.7171	686.962	-3.3426	4.3204e-35	1.6198e-35	AVR78_RS11355	NADH-quinone oxidoreductase subunit M
AVR78_RS11360	152.797	930.013	-2.6056	4.1552e-18	8.3267e-19	AVR78_RS11360	NADH-quinone oxidoreductase subunit L
AVR78_RS11370	43.4084	205.042	-2.2399	0.014859	0.0014993	AVR78_RS11370	NADH-quinone oxidoreductase subunit J
AVR78_RS11380	65.9807	388.116	-2.5564	1.053e-07	1.3712e-08	AVR78_RS11380	NADH-quinone oxidoreductase subunit H
AVR78_RS11385	118.071	1513.41	-3.6801	4.1193e-98	8.6318e-98	AVR78_RS11385	NADH-quinone oxidoreductase subunit NuoG
AVR78_RS11390	95.4984	791.575	-3.0512	6.1831e-30	1.912e-30	AVR78_RS11390	NADH-quinone oxidoreductase subunit NuoF
AVR78_RS11395	13.8907	185.514	-3.7393	5.9219e-14	1.0013e-14	AVR78_RS11395	NADH-quinone oxidoreductase subunit NuoE
AVR78_RS11400	105.916	924.783	-3.1262	1.0095e-37	4.1104e-38	AVR78_RS11400	NADH-quinone oxidoreductase subunit NuoC/D
AVR78_RS11405	60.7717	325.696	-2.4221	3.593e-05	4.2063e-06	AVR78_RS11405	NADH-quinone oxidoreductase subunit B
AVR78_RS11410	10.418	154.13	-3.887	7.3419e-13	1.1805e-13	AVR78_RS11410	NADH-quinone oxidoreductase subunit A
AVR78_RS11450	39.9357	185.166	-2.2131	0.028357	0.0028015	AVR78_RS11450	YfbU family protein
AVR78_RS11455	46.881	882.24	-4.2341	5.9688e-79	8.2255e-79	AVR78_RS11455	DUF412 domain-containing protein
AVR78_RS11460	256.978	1083.45	-2.0759	0.00018135	2.0377e-05	AVR78_RS11460	acetate kinase
AVR78_RS11465	211.833	631.865	-1.5767	0.045605	0.0044585	AVR78_RS11465	phosphate acetyltransferase
AVR78_RS11520	24.3087	152.387	-2.6482	0.00024941	2.7808e-05	AVR78_RS11520	histidine/lysine/arginine/ornithine ABC transporter permease HisQ
AVR78_RS11525	85.0804	418.105	-2.297	0.00011145	1.2697e-05	AVR78_RS11525	histidine ABC transporter substrate-binding protein HisJ
AVR78_RS11530	53.8264	603.619	-3.4873	5.5903e-35	2.0857e-35	AVR78_RS11530	lysine/arginine/ornithine ABC transporter substrate-binding protein ArgT
AVR78_RS11545	109.389	232.939	-1.0905	4.0031e-06	4.9001e-07	AVR78_RS11545	amidophosphoribosyltransferase
AVR78_RS11565	142.379	589.671	-2.0502	0.011114	0.0011309	AVR78_RS11565	acetyl-CoA carboxylase carboxyltransferase subunit beta
AVR78_RS11590	55.5627	140.531	-1.3387	0.0292	0.0028829	flk	flagella biosynthesis regulator Flk
AVR78_RS11635	74.6624	185.166	-1.3104	0.0073577	0.0007579	AVR78_RS11635	50S ribosomal protein L3 N(5)-glutamine methyltransferase
AVR78_RS11645	71.1897	639.885	-3.1681	8.4049e-28	2.4167e-28	AVR78_RS11645	phosphohistidine phosphatase
AVR78_RS11670	97.2348	514.698	-2.4042	4.0266e-07	5.1371e-08	AVR78_RS11670	long-chain fatty acid transporter FadL
AVR78_RS11675	65.9807	313.492	-2.2483	0.0022008	0.0002326	AVR78_RS11675	phospholipid-binding lipoprotein MlaA
AVR78_RS11730	32.9904	189.35	-2.5209	0.00035968	3.9744e-05	AVR78_RS11730	hypothetical protein
AVR78_RS11745	151.061	429.612	-1.5079	0.024057	0.0023875	AVR78_RS11745	phage tail tape measure protein
AVR78_RS11870	57.2991	261.882	-2.1923	0.012641	0.0012826	AVR78_RS11870	hypothetical protein
AVR78_RS11875	72.9261	6059.56	-6.3766	0	0	AVR78_RS11875	hypothetical protein
AVR78_RS11970	17.3633	89.9675	-2.3734	0.042756	0.004188	AVR78_RS11970	hypothetical protein
AVR78_RS11975	218.778	1499.11	-2.7766	5.4855e-38	2.2577e-38	AVR78_RS11975	integrase
AVR78_RS12015	171.897	386.372	-1.1684	2.1158e-07	2.7274e-08	AVR78_RS12015	alanine transaminase
AVR78_RS12045	213.569	1094.26	-2.3572	5.3202e-12	8.2901e-13	AVR78_RS12045	indolepyruvate decarboxylase
AVR78_RS12145	125.016	837.256	-2.7436	7.5999e-21	1.6865e-21	AVR78_RS12145	cell division protein ZipA
AVR78_RS12170	312.54	675.803	-1.1126	3.6791e-14	6.2786e-15	AVR78_RS12170	phosphocarrier protein HPr
AVR78_RS12175	635.499	1887.57	-1.5706	0.00035899	3.9678e-05	AVR78_RS12175	phosphoenolpyruvate-protein phosphotransferase PtsI
AVR78_RS12180	262.187	1182.83	-2.1736	3.7556e-07	4.7967e-08	AVR78_RS12180	glucose-specific phosphotransferase enzyme IIA component
AVR78_RS12190	83.3441	185.166	-1.1517	0.00021347	2.3899e-05	pdxK	pyridoxine/pyridoxal/pyridoxamine kinase
AVR78_RS12240	140.643	310.353	-1.1419	1.0738e-06	1.346e-07	AVR78_RS12240	dyp-type peroxidase
AVR78_RS12245	60.7717	123.793	-1.0265	0.00020048	2.2488e-05	AVR78_RS12245	RpoE-regulated lipoprotein
AVR78_RS12260	74.6624	324.65	-2.1204	0.019767	0.0019767	AVR78_RS12260	N-acetylmuramoyl-L-alanine amidase AmiA
AVR78_RS12355	168.424	1233.39	-2.8725	2.3724e-36	9.297e-37	AVR78_RS12355	NADP-dependent oxaloacetate-decarboxylating malate dehydrogenase
AVR78_RS12360	65.9807	286.99	-2.1209	0.028234	0.0027911	AVR78_RS12360	transaldolase
AVR78_RS12365	220.515	861.317	-1.9657	0.03008	0.0029666	AVR78_RS12365	transketolase
AVR78_RS12390	12.1543	79.8549	-2.7159	0.0047572	0.00049447	AVR78_RS12390	ArsC family reductase
AVR78_RS12395	43.4084	230.498	-2.4087	0.00064321	7.0212e-05	AVR78_RS12395	succinyl-diaminopimelate desuccinylase
AVR78_RS12420	69.4534	168.428	-1.278	0.005945	0.00061584	AVR78_RS12420	phosphoribosylaminoimidazolesuccinocarboxamide synthase
AVR78_RS12430	105.916	639.537	-2.5941	1.1803e-12	1.884e-13	AVR78_RS12430	outer membrane protein assembly factor BamC
AVR78_RS12435	213.569	933.152	-2.1274	5.6665e-05	6.555e-06	AVR78_RS12435	4-hydroxy-tetrahydrodipicolinate synthase
AVR78_RS12440	36.463	220.386	-2.5955	2.938e-05	3.4544e-06	AVR78_RS12440	glycine cleavage system transcriptional repressor
AVR78_RS12460	95.4984	195.627	-1.0346	3.8898e-06	4.7664e-07	AVR78_RS12460	beta-barrel assembly-enhancing protease
AVR78_RS12530	135.434	362.66	-1.421	0.0051536	0.00053519	AVR78_RS12530	polyphosphate kinase 1
AVR78_RS12535	95.4984	211.319	-1.1459	6.4326e-05	7.4244e-06	AVR78_RS12535	exopolyphosphatase
AVR78_RS12545	26.045	243.401	-3.2243	3.8364e-12	6.0189e-13	AVR78_RS12545	DUF2633 domain-containing protein
AVR78_RS12560	149.325	839	-2.4902	4.4195e-13	7.1766e-14	AVR78_RS12560	GMP synthase (glutamine-hydrolyzing)
AVR78_RS12565	230.933	965.931	-2.0644	0.00065382	7.1319e-05	AVR78_RS12565	IMP dehydrogenase
AVR78_RS12570	74.6624	347.317	-2.2178	0.0024268	0.00025607	AVR78_RS12570	exodeoxyribonuclease VII large subunit
AVR78_RS12575	64.2444	600.481	-3.2245	1.0639e-27	3.0439e-28	AVR78_RS12575	hypothetical protein
AVR78_RS12585	128.489	265.718	-1.0483	1.3735e-07	1.7835e-08	AVR78_RS12585	ribosome biogenesis GTPase Der
AVR78_RS12590	90.2894	244.098	-1.4348	0.027861	0.0027555	AVR78_RS12590	outer membrane protein assembly factor BamB
AVR78_RS12595	32.9904	184.817	-2.486	0.00072227	7.8636e-05	AVR78_RS12595	membrane protein
AVR78_RS12600	79.8714	507.026	-2.6663	1.057e-11	1.624e-12	AVR78_RS12600	histidine--tRNA ligase
AVR78_RS12610	71.1897	318.722	-2.1626	0.010183	0.0010392	AVR78_RS12610	cytoskeleton protein RodZ
AVR78_RS12615	85.0804	378.003	-2.1515	0.006442	0.00066567	AVR78_RS12615	bifunctional tRNA (adenosine(37)-C2)-methyltransferase TrmG/ribosomal RNA large subunit methyltransferase RlmN
AVR78_RS12620	53.8264	380.095	-2.82	1.8672e-11	2.8429e-12	AVR78_RS12620	nucleoside-diphosphate kinase
AVR78_RS12695	256.978	531.785	-1.0492	9.819e-14	1.6397e-14	AVR78_RS12695	Fe-S cluster assembly transcriptional regulator IscR
AVR78_RS12725	97.2348	769.606	-2.9846	6.1232e-27	1.7197e-27	AVR78_RS12725	stationary phase inducible protein CsiE
AVR78_RS12740	173.633	1094.26	-2.6558	4.6157e-23	1.0998e-23	AVR78_RS12740	serine hydroxymethyltransferase
AVR78_RS12760	27.7814	224.919	-3.0172	2.993e-09	4.1659e-10	AVR78_RS12760	nitrogen regulatory protein P-II
AVR78_RS12775	98.9711	1625	-4.0373	1.6013e-130	5.2118e-130	AVR78_RS12775	sensor histidine kinase
AVR78_RS12795	71.1897	162.848	-1.1938	0.0013144	0.0001408	AVR78_RS12795	acid phosphatase AphA
AVR78_RS12800	112.862	235.729	-1.0626	1.2208e-06	1.5265e-07	AVR78_RS12800	MurR/RpiR family transcriptional regulator
AVR78_RS12825	59.0354	254.211	-2.1064	0.047247	0.0046102	AVR78_RS12825	GTPase Era
AVR78_RS12830	43.4084	234.334	-2.4325	0.00037809	4.1718e-05	AVR78_RS12830	ribonuclease 3
AVR78_RS12840	72.9261	185.166	-1.3443	0.01357	0.001375	AVR78_RS12840	signal peptidase I
AVR78_RS12845	104.18	712.069	-2.7729	8.5726e-19	1.7602e-19	AVR78_RS12845	elongation factor 4
AVR78_RS12855	52.09	507.724	-3.285	4.7419e-25	1.235e-25	AVR78_RS12855	sigma-E factor regulatory protein RseB
AVR78_RS12860	175.37	1418.56	-3.016	3.9043e-50	2.3889e-50	AVR78_RS12860	anti-sigma-E factor RseA
AVR78_RS12865	310.804	1440.18	-2.2122	1.032e-09	1.4635e-10	AVR78_RS12865	RNA polymerase sigma factor RpoE
AVR78_RS12880	95.4984	217.596	-1.1881	0.00017397	1.9563e-05	AVR78_RS12880	ATP-dependent RNA helicase SrmB
AVR78_RS12885	560.836	2754.47	-2.2961	3.8009e-23	9.0894e-24	AVR78_RS12885	autonomous glycyl radical cofactor GrcA
AVR78_RS12900	6.94534	56.1425	-3.015	0.0030821	0.00032322	AVR78_RS12900	thioredoxin TrxC
AVR78_RS12950	335.113	834.118	-1.3156	1.9098e-08	2.5589e-09	AVR78_RS12950	ATP-dependent chaperone ClpB
AVR78_RS12955	31.254	155.874	-2.3183	0.014448	0.0014595	AVR78_RS12955	laccase domain-containing protein
AVR78_RS12960	71.1897	153.782	-1.1111	0.00029462	3.2696e-05	AVR78_RS12960	23S rRNA pseudouridine(1911/1915/1917) synthase RluD
AVR78_RS12975	1540.13	3349.02	-1.1207	3.5957e-62	3.261e-62	AVR78_RS12975	translation inhibitor protein RaiA
AVR78_RS13020	5.209	36.9634	-2.827	0.035228	0.0034676	AVR78_RS13020	DUF2946 domain-containing protein
AVR78_RS13030	164.952	1043.69	-2.6616	2.6938e-22	6.2879e-23	AVR78_RS13030	50S ribosomal protein L19
AVR78_RS13035	197.942	1910.24	-3.2706	2.9468e-88	5.1223e-88	AVR78_RS13035	tRNA (guanosine(37)-N1)-methyltransferase TrmD
AVR78_RS13040	144.116	1420.65	-3.3013	4.6938e-68	5.1654e-68	rimM	ribosome maturation factor RimM
AVR78_RS13045	46.881	389.162	-3.0533	1.4747e-15	2.6497e-16	AVR78_RS13045	30S ribosomal protein S16
AVR78_RS13050	211.833	500.401	-1.2402	2.7603e-07	3.5383e-08	AVR78_RS13050	signal recognition particle protein
AVR78_RS13065	121.543	262.58	-1.1113	2.2527e-06	2.7887e-07	AVR78_RS13065	nucleotide exchange factor GrpE
AVR78_RS13090	97.2348	270.6	-1.4766	0.044037	0.0043116	AVR78_RS13090	outer membrane protein assembly factor BamE
AVR78_RS13105	55.5627	251.421	-2.1779	0.018004	0.0018032	AVR78_RS13105	SsrA-binding protein
AVR78_RS13110	19639.7	389193	-4.3086	0	0	ssrA	transfer-messenger RNA
AVR78_RS13265	145.852	603.619	-2.0491	0.010472	0.0010672	AVR78_RS13265	DUF4325 domain-containing protein
AVR78_RS13270	185.788	495.519	-1.4153	0.00087873	9.5196e-05	AVR78_RS13270	hypothetical protein
AVR78_RS13380	135.434	311.748	-1.2028	1.2459e-05	1.4882e-06	AVR78_RS13380	3-phosphoshikimate 1-carboxyvinyltransferase
AVR78_RS13440	109.389	482.965	-2.1425	0.0026047	0.00027427	AVR78_RS13440	transcriptional regulator
AVR78_RS13495	64.2444	147.854	-1.2025	0.0026086	0.00027463	AVR78_RS13495	amino acid ABC transporter substrate-binding protein
AVR78_RS13530	197.942	2165.15	-3.4513	2.4561e-117	6.7493e-117	AVR78_RS13530	aldehyde dehydrogenase
AVR78_RS13555	1.73633	44.9838	-4.6953	3.228e-06	3.9735e-07	AVR78_RS13555	transcriptional regulator
AVR78_RS13585	36.463	266.067	-2.8673	5.7263e-09	7.8795e-10	AVR78_RS13585	L-alanine exporter AlaE
AVR78_RS13615	8.68167	57.1887	-2.7197	0.01653	0.0016581	nrdI	class Ib ribonucleoside-diphosphate reductase assembly flavoprotein NrdI
AVR78_RS13635	32.9904	73.5781	-1.1572	0.02085	0.0020814	AVR78_RS13635	proline/glycine betaine ABC transporter permease ProW
AVR78_RS13660	100.707	529.693	-2.395	3.8888e-07	4.964e-08	AVR78_RS13660	transcriptional regulator
AVR78_RS13690	85.0804	396.485	-2.2204	0.0011255	0.00012105	AVR78_RS13690	S-ribosylhomocysteine lyase
AVR78_RS13695	123.28	304.076	-1.3025	0.00046862	5.1547e-05	AVR78_RS13695	glutamate--cysteine ligase
AVR78_RS13745	349.003	1793.07	-2.3611	6.4923e-19	1.342e-19	AVR78_RS13745	carbon storage regulator
AVR78_RS13765	131.961	577.466	-2.1296	0.0014449	0.00015435	AVR78_RS13765	DNA recombination/repair protein RecA
AVR78_RS14130	41.672	282.108	-2.7591	3.6376e-08	4.8218e-09	AVR78_RS14130	MarR family transcriptional regulator
AVR78_RS14150	232.669	3071.8	-3.7227	5.4561e-203	3.0911e-202	AVR78_RS14150	RNA polymerase sigma factor RpoS
AVR78_RS14155	423.666	2550.48	-2.5898	2.3016e-45	1.214e-45	nlpD	murein hydrolase activator NlpD
AVR78_RS14160	31.254	68.6962	-1.1362	0.020471	0.0020444	AVR78_RS14160	protein-L-isoaspartate(D-aspartate) O-methyltransferase
AVR78_RS14240	166.688	419.849	-1.3327	0.00013038	1.478e-05	AVR78_RS14240	7-carboxy-7-deazaguanine synthase QueE
AVR78_RS14250	618.135	3118.18	-2.3347	2.4735e-29	7.4578e-30	AVR78_RS14250	enolase
AVR78_RS14255	288.232	2703.91	-3.2297	3.1372e-119	8.7252e-119	pyrG	CTP synthetase
AVR78_RS14270	149.325	307.215	-1.0408	9.975e-09	1.3559e-09	rumA	23S rRNA (uracil(1939)-C(5))-methyltransferase RlmD
AVR78_RS14315	39.9357	96.5931	-1.2742	0.035693	0.0035127	AVR78_RS14315	SecY-interacting protein
AVR78_RS14320	59.0354	388.116	-2.7168	4.6901e-10	6.7428e-11	AVR78_RS14320	NADPH-dependent 7-cyano-7-deazaguanine reductase QueF
AVR78_RS14325	90.2894	599.435	-2.731	4.5674e-15	8.043e-16	AVR78_RS14325	LOG family protein
AVR78_RS14330	166.688	1001.85	-2.5874	1.003e-18	2.0511e-19	AVR78_RS14330	serine transporter
AVR78_RS14450	0	49.8657	-6.64	5.6309e-09	7.7506e-10	AVR78_RS14450	membrane protein
AVR78_RS14455	59.0354	1471.91	-4.64	2.1223e-153	9.3648e-153	AVR78_RS14455	transcriptional regulator GcvA
AVR78_RS14590	163.215	826.446	-2.3401	5.3421e-09	7.3575e-10	AVR78_RS14590	cobyrinate a%2Cc-diamide synthase
AVR78_RS14770	46.881	232.939	-2.3129	0.0030429	0.00031932	AVR78_RS14770	thymidylate synthase
AVR78_RS14775	59.0354	442.515	-2.9061	1.1124e-14	1.9317e-15	AVR78_RS14775	prolipoprotein diacylglyceryl transferase
AVR78_RS14780	192.733	8021.41	-5.3792	0	0	AVR78_RS14780	phosphoenolpyruvate--protein phosphotransferase PtsP
AVR78_RS14785	149.325	11325.1	-6.2449	0	0	AVR78_RS14785	RNA pyrophosphohydrolase
AVR78_RS14795	43.4084	104.613	-1.269	0.02705	0.0026793	AVR78_RS14795	DNA mismatch repair endonuclease MutH
AVR78_RS14805	72.9261	168.079	-1.2046	0.0013899	0.00014861	AVR78_RS14805	YgdI/YgdR family lipoprotein
AVR78_RS14830	85.0804	585.138	-2.7819	6.2907e-16	1.1456e-16	AVR78_RS14830	HTH-type transcriptional regulator GalR
AVR78_RS14950	151.061	652.09	-2.1099	0.0013277	0.00014219	AVR78_RS14950	acetyl-CoA C-acetyltransferase
AVR78_RS14955	83.3441	226.314	-1.4412	0.037944	0.0037278	AVR78_RS14955	LysR family transcriptional regulator
AVR78_RS14970	59.0354	369.634	-2.6464	1.2316e-08	1.6663e-09	AVR78_RS14970	oxidoreductase
AVR78_RS14985	53.8264	3179.2	-5.8842	0	0	AVR78_RS14985	EAL domain-containing protein
AVR78_RS15005	12.1543	82.9933	-2.7715	0.0025422	0.00026789	AVR78_RS15005	molecular chaperone
AVR78_RS15010	333.376	788.437	-1.2418	1.2839e-10	1.8914e-11	AVR78_RS15010	type 1 fimbrial protein
AVR78_RS15015	229.196	3651.01	-3.9936	4.8758e-284	4.3029e-283	AVR78_RS15015	DUF1471 domain-containing protein
AVR78_RS15035	142.379	348.711	-1.2923	0.00012591	1.4291e-05	AVR78_RS15035	hypothetical protein
AVR78_RS15055	8.68167	88.5727	-3.3508	8.413e-06	1.0136e-06	AVR78_RS15055	hypothetical protein
AVR78_RS15220	0	10.8101	-4.4343	0.02965	0.0029262	AVR78_RS15220	tRNA-Gly
AVR78_RS15235	88.5531	407.992	-2.2039	0.0014126	0.000151	AVR78_RS15235	lysine--tRNA ligase
AVR78_RS15240	86.8167	411.131	-2.2436	0.00051245	5.6273e-05	AVR78_RS15240	peptide chain release factor 2
AVR78_RS15295	67.7171	180.284	-1.4127	0.043176	0.0042282	AVR78_RS15295	6-phospho-beta-glucosidase
AVR78_RS15325	197.942	956.167	-2.2722	2.2372e-08	2.9854e-09	AVR78_RS15325	aminomethyl-transferring glycine dehydrogenase
AVR78_RS15335	154.534	636.05	-2.0412	0.010581	0.0010781	AVR78_RS15335	glycine cleavage system protein T
AVR78_RS15345	76.3987	182.376	-1.2553	0.0026475	0.00027859	AVR78_RS15345	2-octaprenyl-6-methoxyphenyl hydroxylase
AVR78_RS15355	74.6624	190.048	-1.3479	0.013205	0.0013386	AVR78_RS15355	YecA family protein
AVR78_RS15365	50.3537	485.755	-3.2701	1.0359e-23	2.5669e-24	ssrS	6S RNA
AVR78_RS15370	34.7267	1224.67	-5.1402	4.4913e-148	1.8568e-147	AVR78_RS15370	5-formyltetrahydrofolate cyclo-ligase
AVR78_RS15385	83.3441	213.76	-1.3588	0.0106	0.0010798	AVR78_RS15385	ribose-5-phosphate isomerase
AVR78_RS15395	163.215	420.197	-1.3643	0.0004113	4.535e-05	AVR78_RS15395	oxidative stress defense protein
AVR78_RS15410	123.28	247.585	-1.006	5.8785e-08	7.7341e-09	AVR78_RS15410	mechanosensitive ion channel protein MscS
AVR78_RS15415	324.695	1909.2	-2.5558	4.4061e-32	1.4911e-32	AVR78_RS15415	class II fructose-bisphosphate aldolase
AVR78_RS15420	227.46	2459.46	-3.4347	3.4717e-131	1.1462e-130	AVR78_RS15420	phosphoglycerate kinase
AVR78_RS15530	194.47	1390.31	-2.8378	8.7965e-39	3.7102e-39	AVR78_RS15530	biosynthetic arginine decarboxylase
AVR78_RS15570	57.2991	140.182	-1.2907	0.014704	0.001484	AVR78_RS15570	glutathione synthase
AVR78_RS15745	39.9357	89.6188	-1.1661	0.012094	0.0012281	AVR78_RS15745	hypothetical protein
AVR78_RS15790	74.6624	378.003	-2.3399	7.9679e-05	9.1435e-06	AVR78_RS15790	DedA family protein
AVR78_RS15795	121.543	703.7	-2.5335	2.9693e-12	4.6777e-13	AVR78_RS15795	AraC family transcriptional regulator
AVR78_RS15825	185.788	472.853	-1.3477	9.1892e-05	1.0508e-05	AVR78_RS15825	DNA topoisomerase IV subunit A
AVR78_RS15855	175.37	419.849	-1.2595	6.1527e-06	7.4716e-07	AVR78_RS15855	antibiotic biosynthesis monooxygenase
AVR78_RS15865	27.7814	178.889	-2.6869	3.8534e-05	4.5042e-06	AVR78_RS15865	esterase YqiA
AVR78_RS15870	36.463	1446.11	-5.3096	2.0486e-181	1.0563e-180	AVR78_RS15870	3'%2C5'-cyclic-AMP phosphodiesterase
AVR78_RS15885	343.794	1656.03	-2.2681	2.7426e-13	4.4853e-14	AVR78_RS15885	outer membrane channel protein TolC
AVR78_RS15890	76.3987	551.313	-2.8513	1.1808e-16	2.2189e-17	AVR78_RS15890	membrane protein
AVR78_RS15895	196.206	481.57	-1.2954	7.6506e-06	9.2343e-07	AVR78_RS15895	glutathionylspermidine synthase family protein
AVR78_RS15900	149.325	374.865	-1.3279	0.00025468	2.8364e-05	AVR78_RS15900	4%2C5-DOPA dioxygenase extradiol
AVR78_RS15905	102.444	247.585	-1.2731	0.00074806	8.1366e-05	AVR78_RS15905	zinc transporter ZupT
AVR78_RS15910	125.016	2136.9	-4.0953	2.9859e-176	1.4734e-175	AVR78_RS15910	3%2C4-dihydroxy-2-butanone-4-phosphate synthase
AVR78_RS15920	253.505	2385.19	-3.234	7.5418e-106	1.7932e-105	AVR78_RS15920	cell surface composition regulator GlgS
AVR78_RS15945	71.1897	444.956	-2.6439	4.5624e-10	6.5654e-11	AVR78_RS15945	hypothetical protein
AVR78_RS15950	147.588	320.117	-1.117	2.3231e-07	2.9903e-08	AVR78_RS15950	multifunctional CCA addition/repair protein
AVR78_RS15965	72.9261	172.263	-1.2401	0.0025677	0.00027045	AVR78_RS15965	glycerol-3-phosphate 1-O-acyltransferase PlsY
AVR78_RS16030	510.482	1134.71	-1.1524	5.3516e-20	1.1492e-20	AVR78_RS16030	30S ribosomal protein S21
AVR78_RS16040	210.097	1541.65	-2.8754	3.424e-45	1.7957e-45	AVR78_RS16040	RNA polymerase sigma factor RpoD
AVR78_RS16155	83.3441	228.406	-1.4544	0.045858	0.0044823	AVR78_RS16155	PadR family transcriptional regulator
AVR78_RS16165	230.933	947.449	-2.0366	0.002149	0.00022717	AVR78_RS16165	putrescine aminotransferase
AVR78_RS16175	57.2991	149.946	-1.3879	0.047705	0.0046529	AVR78_RS16175	3-hydroxy-5-phosphonooxypentane-2%2C4-dione thiolase
AVR78_RS16180	83.3441	174.007	-1.062	3.0115e-05	3.5381e-06	AVR78_RS16180	autoinducer 2 ABC transporter substrate-binding protein LsrB
AVR78_RS16185	41.672	102.521	-1.2988	0.040512	0.0039716	AVR78_RS16185	ABC transporter permease
AVR78_RS16200	46.881	968.72	-4.369	9.94e-92	1.8393e-91	AVR78_RS16200	transcriptional regulator LsrR
AVR78_RS16205	100.707	505.98	-2.3289	7.3019e-06	8.8344e-07	AVR78_RS16205	autoinducer-2 kinase
AVR78_RS16225	24.3087	141.926	-2.5456	0.0014878	0.00015885	AVR78_RS16225	XRE family transcriptional regulator
AVR78_RS16235	128.489	283.851	-1.1435	3.2976e-06	4.0559e-07	AVR78_RS16235	gfo/Idh/MocA family oxidoreductase
AVR78_RS16240	105.916	221.78	-1.0662	2.8772e-06	3.5484e-07	AVR78_RS16240	membrane protein
AVR78_RS16245	92.0258	1652.19	-4.1662	1.3757e-141	5.1748e-141	AVR78_RS16245	serine/threonine transporter SstT
AVR78_RS16270	92.0258	448.094	-2.2837	9.2945e-05	1.0621e-05	AVR78_RS16270	GntR family transcriptional regulator
AVR78_RS16275	86.8167	230.15	-1.4065	0.020005	0.0019997	AVR78_RS16275	DedA family protein
AVR78_RS16285	81.6077	426.125	-2.3845	7.3684e-06	8.9125e-07	AVR78_RS16285	DUF1090 domain-containing protein
AVR78_RS16290	6.94534	200.509	-4.8515	6.8953e-24	1.7235e-24	AVR78_RS16290	DUF883 domain-containing protein
AVR78_RS16295	12.1543	124.49	-3.3565	1.1924e-07	1.5501e-08	AVR78_RS16295	hypothetical protein
AVR78_RS16300	19.0997	134.254	-2.8133	7.17e-05	8.2609e-06	AVR78_RS16300	hypothetical protein
AVR78_RS16345	6677.94	88461.1	-3.7276	0	0	rnpB	RNase P RNA component class A
AVR78_RS16385	57.2991	123.095	-1.1032	0.00103	0.00011108	AVR78_RS16385	1-phosphofructokinase
AVR78_RS16425	39.9357	381.142	-3.2546	1.1105e-18	2.2639e-19	AVR78_RS16425	DeoR/GlpR transcriptional regulator
AVR78_RS16450	65.9807	133.905	-1.0211	9.6693e-05	1.1043e-05	AVR78_RS16450	osmotically-inducible protein OsmY
AVR78_RS16510	248.296	1344.63	-2.4371	1.0387e-17	2.0466e-18	AVR78_RS16510	DEAD/DEAH family ATP-dependent RNA helicase
AVR78_RS16515	678.907	3085.05	-2.184	4.197e-17	8.0891e-18	AVR78_RS16515	lipoprotein NlpI
AVR78_RS16520	527.846	3095.86	-2.5522	1.4176e-50	8.7556e-51	AVR78_RS16520	polyribonucleotide nucleotidyltransferase
AVR78_RS16540	10.418	69.3936	-2.7357	0.0074143	0.00076356	AVR78_RS16540	ribosome-binding factor A
AVR78_RS16545	361.158	1585.59	-2.1343	9.0526e-08	1.1825e-08	AVR78_RS16545	translation initiation factor IF-2
AVR78_RS16550	125.016	894.794	-2.8394	1.2971e-25	3.4428e-26	nusA	transcription termination/antitermination protein NusA
AVR78_RS16555	88.5531	491.683	-2.4731	5.7084e-08	7.5182e-09	AVR78_RS16555	ribosome maturation factor RimP
AVR78_RS16570	161.479	397.182	-1.2985	5.453e-05	6.3096e-06	AVR78_RS16570	argininosuccinate synthase
AVR78_RS16575	39.9357	261.534	-2.7112	3.6192e-07	4.6276e-08	AVR78_RS16575	Crp/Fnr family transcriptional regulator
AVR78_RS16595	220.515	605.712	-1.4578	0.0012991	0.0001392	AVR78_RS16595	preprotein translocase subunit SecG
AVR78_RS16600	121.543	305.471	-1.3296	0.0010076	0.00010877	AVR78_RS16600	phosphoglucosamine mutase
AVR78_RS16610	390.675	2561.29	-2.7128	2.7578e-57	2.1745e-57	hflB	ATP-dependent zinc metalloprotease FtsH
AVR78_RS16640	175.37	388.813	-1.1487	6.8811e-08	9.0402e-09	obgE	GTPase ObgE
AVR78_RS16645	92.0258	235.38	-1.3549	0.006742	0.00069573	AVR78_RS16645	EamA family transporter
AVR78_RS16650	111.125	698.469	-2.652	3.5001e-15	6.1968e-16	AVR78_RS16650	50S ribosomal protein L27
AVR78_RS16655	517.428	1357.53	-1.3916	3.6663e-09	5.0738e-10	AVR78_RS16655	50S ribosomal protein L21
AVR78_RS16660	100.707	432.053	-2.101	0.010839	0.0011031	AVR78_RS16660	octaprenyl-diphosphate synthase
AVR78_RS16670	131.961	304.425	-1.206	1.7767e-05	2.1057e-06	AVR78_RS16670	UDP-N-acetylglucosamine 1-carboxyvinyltransferase
AVR78_RS16675	3.47267	52.3067	-3.9129	2.5454e-05	2.9974e-06	AVR78_RS16675	BolA family transcriptional regulator
AVR78_RS16695	50.3537	114.029	-1.1792	0.0057257	0.00059339	AVR78_RS16695	ABC transporter permease
AVR78_RS16700	118.071	313.492	-1.4088	0.0069911	0.00072095	AVR78_RS16700	phospholipid ABC transporter ATP-binding protein MlaF
AVR78_RS16710	53.8264	112.983	-1.0697	0.00089647	9.7049e-05	AVR78_RS16710	arabinose-5-phosphate isomerase KdsD
AVR78_RS16715	65.9807	135.649	-1.0398	0.00013667	1.5478e-05	AVR78_RS16715	3-deoxy-manno-octulosonate-8-phosphatase KdsC
AVR78_RS16730	81.6077	163.894	-1.006	1.0258e-05	1.2316e-06	AVR78_RS16730	ABC transporter ATP-binding protein
AVR78_RS16855	196.206	1040.9	-2.4074	4.4811e-13	7.2737e-14	AVR78_RS16855	30S ribosomal protein S9
AVR78_RS16870	163.215	371.378	-1.1861	8.5175e-07	1.0735e-07	AVR78_RS16870	hypothetical protein
AVR78_RS16875	105.916	281.41	-1.4097	0.010827	0.0011022	AVR78_RS16875	serine endoprotease DegQ
AVR78_RS16885	184.052	2006.49	-3.4465	1.9299e-108	4.8931e-108	AVR78_RS16885	malate dehydrogenase
AVR78_RS16890	86.8167	465.53	-2.4228	7.5909e-07	9.5859e-08	AVR78_RS16890	arginine repressor
AVR78_RS16895	142.379	767.165	-2.4298	1.461e-10	2.1496e-11	AVR78_RS16895	DUF1471 domain-containing protein
AVR78_RS16900	180.579	411.479	-1.1882	2.4447e-07	3.1434e-08	AVR78_RS16900	DUF1471 domain-containing protein
AVR78_RS16915	67.7171	2168.64	-5.0011	1.7718e-251	1.3114e-250	AVR78_RS16915	p-hydroxybenzoic acid efflux pump subunit AaeA
AVR78_RS16920	29.5177	140.879	-2.2548	0.037707	0.0037054	AVR78_RS16920	protein AaeX
AVR78_RS16930	182.315	447.048	-1.294	1.5262e-05	1.8154e-06	AVR78_RS16930	metalloprotease TldD
AVR78_RS16950	22.5724	45.6812	-1.017	0.021964	0.0021868	AVR78_RS16950	rod shape-determining protein MreD
AVR78_RS16955	76.3987	175.053	-1.1962	0.00091341	9.8813e-05	AVR78_RS16955	rod shape-determining protein MreC
AVR78_RS16960	163.215	753.217	-2.2063	1.3042e-05	1.5558e-06	AVR78_RS16960	rod shape-determining protein
AVR78_RS16980	55.5627	139.485	-1.3279	0.025688	0.0025466	AVR78_RS16980	protein-methionine-sulfoxide reductase catalytic subunit MsrP
AVR78_RS16985	52.09	104.265	-1.0012	0.00039444	4.3501e-05	AVR78_RS16985	protein-methionine-sulfoxide reductase heme-binding subunit MsrQ
AVR78_RS16990	60.7717	144.018	-1.2448	0.0063227	0.00065364	AVR78_RS16990	type II 3-dehydroquinate dehydratase
AVR78_RS16995	41.672	240.96	-2.5316	4.602e-05	5.3587e-06	AVR78_RS16995	acetyl-CoA carboxylase biotin carboxyl carrier protein
AVR78_RS17000	111.125	783.903	-2.8185	5.7206e-22	1.3172e-22	AVR78_RS17000	acetyl-CoA carboxylase biotin carboxylase subunit
AVR78_RS17015	50.3537	101.475	-1.011	0.00056935	6.2282e-05	AVR78_RS17015	50S ribosomal protein L11 methyltransferase
AVR78_RS17025	114.598	640.932	-2.4836	3.4231e-10	4.9507e-11	AVR78_RS17025	tRNA dihydrouridine synthase DusB
AVR78_RS17080	57.2991	150.295	-1.3912	0.049549	0.0048255	AVR78_RS17080	gamma carbonic anhydrase family protein
AVR78_RS17090	93.7621	438.679	-2.2261	0.0005276	5.7868e-05	AVR78_RS17090	shikimate dehydrogenase
AVR78_RS17095	24.3087	324.302	-3.7378	3.2664e-23	7.8356e-24	AVR78_RS17095	L-threonylcarbamoyladenylate synthase type 1 TsaC
AVR78_RS17100	26.045	569.794	-4.4514	1.5455e-56	1.184e-56	AVR78_RS17100	DNA topoisomerase I-like protein
AVR78_RS17105	125.016	1125.29	-3.1701	1.0482e-47	5.9385e-48	AVR78_RS17105	DUF494 domain-containing protein
AVR78_RS17115	93.7621	963.838	-3.3617	2.3027e-49	1.3688e-49	AVR78_RS17115	peptide deformylase
AVR78_RS17120	57.2991	380.793	-2.7324	3.9769e-10	5.7409e-11	AVR78_RS17120	methionyl-tRNA formyltransferase
AVR78_RS17150	32.9904	199.463	-2.596	6.9815e-05	8.0478e-06	AVR78_RS17150	hypothetical protein
AVR78_RS17155	133.698	968.023	-2.8561	3.0948e-28	9.0402e-29	AVR78_RS17155	50S ribosomal protein L17
AVR78_RS17160	538.264	3148.52	-2.5483	5.5596e-51	3.4759e-51	AVR78_RS17160	DNA-directed RNA polymerase subunit alpha
AVR78_RS17165	343.794	1927.68	-2.4872	7.4107e-28	2.1388e-28	AVR78_RS17165	30S ribosomal protein S4
AVR78_RS17170	72.9261	841.092	-3.5278	1.3532e-49	8.1813e-50	AVR78_RS17170	30S ribosomal protein S11
AVR78_RS17175	177.106	925.829	-2.3861	3.4957e-11	5.2649e-12	AVR78_RS17175	30S ribosomal protein S13
AVR78_RS17185	760.515	3870	-2.3473	2.1025e-37	8.5085e-38	AVR78_RS17185	preprotein translocase subunit SecY
AVR78_RS17190	265.659	1244.2	-2.2276	4.7313e-09	6.5279e-10	AVR78_RS17190	50S ribosomal protein L15
AVR78_RS17200	194.47	974.648	-2.3253	6.0604e-10	8.6613e-11	AVR78_RS17200	30S ribosomal protein S5
AVR78_RS17205	26.045	416.013	-3.9975	4.7566e-34	1.7201e-34	AVR78_RS17205	50S ribosomal protein L18
AVR78_RS17210	159.743	1248.74	-2.9666	1.0367e-41	4.8349e-42	AVR78_RS17210	50S ribosomal protein L6
AVR78_RS17215	154.534	964.885	-2.6424	4.8664e-20	1.047e-20	AVR78_RS17215	30S ribosomal protein S8
AVR78_RS17220	64.2444	523.416	-3.0263	8.915e-20	1.9046e-20	AVR78_RS17220	30S ribosomal protein S14
AVR78_RS17225	218.778	1491.79	-2.7695	2.1621e-37	8.7341e-38	AVR78_RS17225	50S ribosomal protein L5
AVR78_RS17230	112.862	481.222	-2.0921	0.0087838	0.00090055	AVR78_RS17230	50S ribosomal protein L24
AVR78_RS17235	329.904	1561.53	-2.2428	1.35e-11	2.0678e-12	AVR78_RS17235	50S ribosomal protein L14
AVR78_RS17250	111.125	601.876	-2.4373	9.8098e-09	1.3346e-09	AVR78_RS17250	50S ribosomal protein L16
AVR78_RS17255	401.093	1749.83	-2.1252	4.1925e-08	5.5429e-09	AVR78_RS17255	30S ribosomal protein S3
AVR78_RS17260	72.9261	442.515	-2.6012	2.5865e-09	3.6132e-10	AVR78_RS17260	50S ribosomal protein L22
AVR78_RS17265	24.3087	187.607	-2.9482	2.2324e-07	2.8744e-08	AVR78_RS17265	30S ribosomal protein S19
AVR78_RS17270	230.933	2141.79	-3.2133	2.9037e-93	5.5062e-93	AVR78_RS17270	50S ribosomal protein L2
AVR78_RS17275	50.3537	271.646	-2.4316	0.00013206	1.4964e-05	AVR78_RS17275	50S ribosomal protein L23
AVR78_RS17280	118.071	1264.08	-3.4204	1.6134e-67	1.7462e-67	AVR78_RS17280	50S ribosomal protein L4
AVR78_RS17285	158.006	1923.84	-3.6059	7.8731e-118	2.1765e-117	AVR78_RS17285	50S ribosomal protein L3
AVR78_RS17290	566.045	2382.75	-2.0736	3.5049e-08	4.6513e-09	AVR78_RS17290	30S ribosomal protein S10
AVR78_RS17300	100.707	712.417	-2.8226	3.1507e-20	6.8168e-21	AVR78_RS17300	bacterioferritin
AVR78_RS17315	607.717	5390.03	-3.1488	1.4394e-216	8.8072e-216	AVR78_RS17315	elongation factor G
AVR78_RS17320	118.071	1153.54	-3.2883	6.2391e-55	4.5591e-55	AVR78_RS17320	30S ribosomal protein S7
AVR78_RS17325	260.45	1486.91	-2.5132	3.7068e-23	8.8736e-24	AVR78_RS17325	30S ribosomal protein S12
AVR78_RS17345	60.7717	314.886	-2.3734	0.00015026	1.6979e-05	AVR78_RS17345	hypothetical protein
AVR78_RS17350	260.45	1352.65	-2.3767	2.8462e-15	5.0645e-16	AVR78_RS17350	FKBP-type peptidyl-prolyl cis-trans isomerase
AVR78_RS17360	241.351	1089.37	-2.1743	1.0388e-06	1.3039e-07	AVR78_RS17360	peptidylprolyl isomerase
AVR78_RS17375	15.627	199.812	-3.6765	2.3919e-14	4.1095e-15	AVR78_RS17375	glutathione-regulated potassium-efflux system ancillary protein KefG
AVR78_RS17405	123.28	292.918	-1.2486	0.0001116	1.2712e-05	AVR78_RS17405	OsmC family protein
AVR78_RS17415	149.325	1751.93	-3.5524	2.8881e-103	6.5611e-103	AVR78_RS17415	cAMP-activated global transcriptional regulator CRP
AVR78_RS17425	156.27	848.066	-2.4401	8.3383e-12	1.2884e-12	AVR78_RS17425	aspartate aminotransferase family protein
AVR78_RS17495	152.797	325.348	-1.0904	5.011e-08	6.6079e-09	AVR78_RS17495	cell division protein DamX
AVR78_RS17500	133.698	323.953	-1.2768	0.00013063	1.4805e-05	AVR78_RS17500	3-dehydroquinate synthase
AVR78_RS17575	128.489	1019.98	-2.9888	2.3941e-35	9.0798e-36	AVR78_RS17575	phosphoenolpyruvate carboxykinase (ATP)
AVR78_RS17615	109.389	263.975	-1.2709	0.00046954	5.1635e-05	AVR78_RS17615	DUF1471 domain-containing protein
AVR78_RS17630	173.633	368.588	-1.086	5.1012e-09	7.0298e-10	AVR78_RS17630	Fe-S biogenesis protein NfuA
AVR78_RS17650	446.238	1770.06	-1.9879	0.00055337	6.0577e-05	AVR78_RS17650	transcriptional regulator
AVR78_RS17660	78.1351	173.31	-1.1493	0.00032179	3.5652e-05	AVR78_RS17660	rhomboid family intramembrane serine protease GlpG
AVR78_RS17670	251.769	522.37	-1.053	2.2373e-13	3.6774e-14	AVR78_RS17670	glycerol-3-phosphate dehydrogenase
AVR78_RS17685	125.016	910.486	-2.8645	5.677e-27	1.5963e-27	AVR78_RS17685	glucose-1-phosphate adenylyltransferase
AVR78_RS17690	281.286	1404.61	-2.3201	1.7561e-13	2.8936e-14	AVR78_RS17690	glycogen debranching protein GlgX
AVR78_RS17695	203.151	2291.03	-3.4954	1.3805e-128	4.369e-128	AVR78_RS17695	1%2C4-alpha-glucan-branching protein
AVR78_RS17700	133.698	384.28	-1.5232	0.044969	0.0043991	AVR78_RS17700	aspartate-semialdehyde dehydrogenase
AVR78_RS17720	107.653	274.436	-1.3501	0.0030598	0.00032103	AVR78_RS17720	transcriptional regulator
AVR78_RS17750	258.714	535.272	-1.0489	7.9581e-14	1.3348e-14	AVR78_RS17750	gamma-glutamyltransferase
AVR78_RS17780	116.334	267.462	-1.2011	4.8933e-05	5.6835e-06	AVR78_RS17780	sn-glycerol-3-phosphate ABC transporter substrate-binding protein UgpB
AVR78_RS17845	328.167	2542.11	-2.9535	1.1549e-81	1.7097e-81	AVR78_RS17845	RNA polymerase sigma factor RpoH
AVR78_RS17865	52.09	291.523	-2.4845	2.2472e-05	2.6523e-06	rsmD	16S rRNA (guanine(966)-N(2))-methyltransferase
AVR78_RS17875	104.18	292.918	-1.4914	0.047143	0.0046011	AVR78_RS17875	DUF2500 domain-containing protein
AVR78_RS17945	55.5627	119.259	-1.1019	0.0012056	0.00012954	AVR78_RS17945	UDP-4-amino-4-deoxy-L-arabinose aminotransferase
AVR78_RS18050	93.7621	490.637	-2.3876	1.3531e-06	1.6887e-07	AVR78_RS18050	universal stress protein B
AVR78_RS18055	100.707	1539.21	-3.934	6.3202e-117	1.7264e-116	AVR78_RS18055	universal stress protein UspA
AVR78_RS18060	185.788	426.823	-1.2	2.7394e-07	3.5135e-08	AVR78_RS18060	dipeptide/tripeptide permease DtpB
AVR78_RS18070	152.797	392.998	-1.3629	0.00060601	6.623e-05	AVR78_RS18070	oligopeptidase A
AVR78_RS18120	83.3441	197.371	-1.2438	0.0013583	0.00014533	AVR78_RS18120	inner membrane protein YhjD
AVR78_RS18175	105.916	242.354	-1.1942	8.9853e-05	1.0285e-05	AVR78_RS18175	cellulose biosynthesis cyclic di-GMP-binding regulatory protein BcsB
AVR78_RS18185	112.862	609.199	-2.4324	9.9837e-09	1.3567e-09	AVR78_RS18185	cellulose biosynthesis protein BcsQ
AVR78_RS18190	6.94534	157.269	-4.501	4.271e-17	8.2282e-18	AVR78_RS18190	hypothetical protein
AVR78_RS18195	126.752	569.794	-2.1684	0.00049414	5.4301e-05	AVR78_RS18195	cellulose biosynthesis protein BcsE
AVR78_RS18240	62.5081	160.756	-1.3628	0.028258	0.0027929	AVR78_RS18240	cellulose biosynthesis protein BcsO
AVR78_RS18255	74.6624	184.12	-1.3022	0.006453	0.00066666	AVR78_RS18255	dipeptide ABC transporter ATP-binding protein
AVR78_RS18270	166.688	2687.52	-4.0111	1.3712e-211	8.1718e-211	AVR78_RS18270	ABC transporter substrate-binding protein
AVR78_RS18300	105.916	280.015	-1.4026	0.0094464	0.00096676	AVR78_RS18300	kdo(2)-lipid A phosphoethanolamine 7''-transferase
AVR78_RS18310	78.1351	197.022	-1.3343	0.0090457	0.00092679	AVR78_RS18310	lipase
AVR78_RS18360	147.588	299.543	-1.0212	5.5184e-09	7.598e-10	AVR78_RS18360	DUF3053 domain-containing protein
AVR78_RS18375	651.126	2703.56	-2.0539	3.6289e-08	4.8116e-09	AVR78_RS18375	cold-shock protein
AVR78_RS18430	64.2444	557.59	-3.1176	3.4411e-23	8.246e-24	AVR78_RS18430	D-xylose transporter subunit XylF
AVR78_RS18530	222.251	648.603	-1.5451	0.017993	0.0018025	AVR78_RS18530	hypothetical protein
AVR78_RS18535	156.27	392.998	-1.3305	0.00019791	2.2211e-05	AVR78_RS18535	hypothetical protein
AVR78_RS18565	131.961	380.095	-1.5262	0.049024	0.0047765	AVR78_RS18565	glycerol-3-phosphate dehydrogenase (NAD(P)(+))
AVR78_RS18580	36.463	184.12	-2.3361	0.0062047	0.00064216	AVR78_RS18580	rhodanese-like domain-containing protein
AVR78_RS18610	86.8167	575.025	-2.7276	1.9432e-14	3.3499e-15	AVR78_RS18610	glycine C-acetyltransferase
AVR78_RS18625	43.4084	94.8495	-1.1277	0.0057119	0.00059209	AVR78_RS18625	lipopolysaccharide heptosyltransferase RfaC
AVR78_RS18650	43.4084	88.5727	-1.0289	0.0017265	0.00018395	AVR78_RS18650	putative lipopolysaccharide heptosyltransferase III
AVR78_RS18710	6.94534	52.6554	-2.9225	0.0070253	0.00072416	AVR78_RS18710	deoxyuridine 5'-triphosphate nucleotidohydrolase
AVR78_RS18755	118.071	942.218	-2.9964	4.3599e-33	1.5297e-33	AVR78_RS18755	guanylate kinase
AVR78_RS18760	20.836	181.679	-3.1242	1.323e-08	1.7889e-09	AVR78_RS18760	DNA-directed RNA polymerase subunit omega
AVR78_RS18765	147.588	882.24	-2.5796	2.004e-16	3.7277e-17	AVR78_RS18765	bifunctional GTP diphosphokinase/guanosine-3'%2C5'-bis(diphosphate) 3'-diphosphatase
AVR78_RS18785	126.752	300.938	-1.2475	8.6565e-05	9.9114e-06	AVR78_RS18785	ferredoxin--NADP(+) reductase
AVR78_RS18835	131.961	276.179	-1.0655	1.7145e-07	2.2182e-08	AVR78_RS18835	sodium/glutamate symporter
AVR78_RS18955	121.543	935.593	-2.9444	8.5537e-31	2.7278e-31	AVR78_RS18955	EmrB/QacA family drug resistance transporter
AVR78_RS18960	95.4984	4539.18	-5.5708	0	0	AVR78_RS18960	TetR/AcrR family transcriptional regulator
AVR78_RS18985	3.47267	40.4505	-3.542	0.0010956	0.00011799	AVR78_RS18985	EefX protein
AVR78_RS18990	22.5724	130.069	-2.5267	0.002913	0.0003059	AVR78_RS18990	MexE family multidrug efflux RND transporter periplasmic adaptor subunit
AVR78_RS19140	20.836	180.981	-3.1187	1.5648e-08	2.107e-09	AVR78_RS19140	addiction module toxin RelE
AVR78_RS19145	3.47267	129.721	-5.2232	1.6243e-17	3.1774e-18	AVR78_RS19145	transcriptional regulator
AVR78_RS19215	114.598	318.722	-1.4757	0.028342	0.0028006	AVR78_RS19215	multidrug transporter EmrD
AVR78_RS19275	46.881	230.847	-2.2999	0.0039071	0.00040842	AVR78_RS19275	heat shock chaperone IbpB
AVR78_RS19280	121.543	541.898	-2.1565	0.000958	0.00010359	AVR78_RS19280	heat-shock protein IbpA
AVR78_RS19285	100.707	518.534	-2.3643	1.5977e-06	1.9865e-07	AVR78_RS19285	YceK/YidQ family lipoprotein
AVR78_RS19310	289.968	1121.46	-1.9514	0.021517	0.0021442	AVR78_RS19310	DNA topoisomerase (ATP-hydrolyzing) subunit B
AVR78_RS19320	102.444	255.257	-1.3171	0.0019534	0.00020711	AVR78_RS19320	DNA polymerase III subunit beta
AVR78_RS19330	135.434	355.337	-1.3916	0.0025566	0.00026934	AVR78_RS19330	50S ribosomal protein L34
AVR78_RS19345	203.151	998.012	-2.2965	2.4289e-09	3.3951e-10	AVR78_RS19345	membrane protein insertase YidC
AVR78_RS19360	104.18	286.99	-1.4619	0.029059	0.0028703	AVR78_RS19360	multidrug transporter MdtL
AVR78_RS19435	180.579	936.29	-2.3743	5.8805e-11	8.7901e-12	AVR78_RS19435	glutamine--fructose-6-phosphate transaminase (isomerizing)
AVR78_RS19440	159.743	1009.17	-2.6593	1.5854e-21	3.6125e-22	AVR78_RS19440	bifunctional UDP-N-acetylglucosamine diphosphorylase/glucosamine-1-phosphate N-acetyltransferase GlmU
AVR78_RS19455	130.225	598.738	-2.2009	0.00012197	1.3851e-05	atpC	ATP synthase epsilon chain
AVR78_RS19460	211.833	1951.74	-3.2038	2.498e-84	3.9529e-84	AVR78_RS19460	ATP synthase subunit beta
AVR78_RS19465	92.0258	1092.51	-3.5695	6.2126e-66	6.378e-66	AVR78_RS19465	ATP synthase subunit gamma
AVR78_RS19470	262.187	2804.34	-3.419	2.4317e-147	9.9635e-147	AVR78_RS19470	ATP synthase subunit alpha
AVR78_RS19475	62.5081	466.227	-2.8989	3.027e-15	5.3757e-16	AVR78_RS19475	ATP synthase subunit delta
AVR78_RS19480	138.907	834.815	-2.5873	7.4076e-16	1.3463e-16	AVR78_RS19480	ATP synthase subunit B
AVR78_RS19490	140.643	686.264	-2.2867	1.1559e-06	1.4465e-07	AVR78_RS19490	F0F1 ATP synthase subunit A
AVR78_RS19505	178.842	384.629	-1.1048	7.165e-09	9.8238e-10	AVR78_RS19505	tRNA uridine-5-carboxymethylaminomethyl(34) synthesis enzyme MnmG
AVR78_RS19545	310.804	1662.31	-2.4191	1.3979e-20	3.0635e-21	AVR78_RS19545	D-ribose pyranase
AVR78_RS19550	159.743	1098.44	-2.7816	1.6711e-28	4.9411e-29	AVR78_RS19550	ribose ABC transporter ATP-binding protein RbsA
AVR78_RS19575	102.444	235.38	-1.2002	0.00013571	1.5373e-05	AVR78_RS19575	MFS transporter
AVR78_RS19580	29.5177	596.297	-4.3364	2.0888e-56	1.595e-56	AVR78_RS19580	FadR family transcriptional regulator
AVR78_RS19625	34.7267	159.361	-2.1982	0.048805	0.0047561	AVR78_RS19625	hypothetical protein
AVR78_RS19630	164.952	667.085	-2.0158	0.017235	0.001728	AVR78_RS19630	serine/threonine protein kinase
AVR78_RS19635	152.797	307.563	-1.0093	1.804e-09	2.5347e-10	AVR78_RS19635	thiol:disulfide interchange protein DsbA
AVR78_RS19645	345.531	1646.62	-2.2526	1.4707e-12	2.3435e-13	AVR78_RS19645	DNA polymerase I
AVR78_RS19655	100.707	239.913	-1.2523	0.00052198	5.7278e-05	AVR78_RS19655	YihA family ribosome biogenesis GTP-binding protein
AVR78_RS19685	144.116	1175.16	-3.0276	2.0306e-42	9.737e-43	AVR78_RS19685	glutamate--ammonia ligase
AVR78_RS19700	276.077	1435.99	-2.3789	3.2493e-16	6.0125e-17	AVR78_RS19700	translational GTPase TypA
AVR78_RS19740	38.1994	336.507	-3.139	6.2341e-15	1.094e-15	AVR78_RS19740	formate dehydrogenase subunit beta
AVR78_RS19745	190.997	1343.24	-2.8141	3.1035e-36	1.2111e-36	AVR78_RS19745	formate dehydrogenase-N subunit alpha
AVR78_RS19750	88.5531	1614.88	-4.1887	6.2134e-140	2.2995e-139	AVR78_RS19750	sulfate ABC transporter substrate-binding protein
AVR78_RS19905	421.929	1027.3	-1.2838	1.9562e-11	2.9715e-12	AVR78_RS19905	superoxide dismutase [Mn]
AVR78_RS19915	138.907	301.287	-1.117	5.2486e-07	6.6664e-08	AVR78_RS19915	two-component system sensor histidine kinase CpxA
AVR78_RS19920	105.916	285.595	-1.431	0.016075	0.0016157	AVR78_RS19920	DNA-binding response regulator
AVR78_RS19925	1036.59	2330.09	-1.1685	3.1716e-37	1.2778e-37	cpxP	periplasmic repressor CpxP
AVR78_RS19930	104.18	218.293	-1.0672	3.5659e-06	4.3754e-07	AVR78_RS19930	cation-efflux pump FieF
AVR78_RS19935	272.605	1655.33	-2.6022	8.8635e-31	2.8227e-31	AVR78_RS19935	ATP-dependent 6-phosphofructokinase
AVR78_RS19940	121.543	500.401	-2.0416	0.023181	0.0023036	AVR78_RS19940	ribonuclease E activity regulator RraA
AVR78_RS20015	90.2894	204.345	-1.1784	0.00021153	2.3693e-05	gldA	glycerol dehydrogenase
AVR78_RS20060	126.752	300.589	-1.2458	8.2562e-05	9.4696e-06	AVR78_RS20060	argininosuccinate lyase
AVR78_RS20075	199.679	1202.36	-2.5901	2.837e-22	6.6154e-23	AVR78_RS20075	soluble pyridine nucleotide transhydrogenase
AVR78_RS20080	55.5627	276.528	-2.3152	0.0011889	0.0001278	AVR78_RS20080	HTH-type transcriptional repressor FabR
AVR78_RS20085	34.7267	171.915	-2.3076	0.011632	0.0011822	AVR78_RS20085	membrane protein
AVR78_RS20090	104.18	218.293	-1.0672	3.5659e-06	4.3754e-07	AVR78_RS20090	tRNA (uridine(54)-C5)-methyltransferase TrmA
AVR78_RS20225	130.225	678.244	-2.3808	1.8528e-08	2.4839e-09	AVR78_RS20225	ATP-dependent RNA helicase RhlB
AVR78_RS20230	541.736	1349.51	-1.3168	1.0053e-12	1.6102e-13	AVR78_RS20230	thioredoxin TrxA
AVR78_RS20240	263.923	2709.14	-3.3596	3.5004e-135	1.2021e-134	AVR78_RS20240	transcription termination factor Rho
AVR78_RS20340	88.5531	517.488	-2.5469	1.232e-09	1.7407e-10	AVR78_RS20340	uroporphyrinogen-III C-methyltransferase
AVR78_RS20345	36.463	347.665	-3.2532	3.7295e-17	7.197e-18	AVR78_RS20345	uroporphyrinogen-III synthase
AVR78_RS20350	192.733	2232.8	-3.5342	2.929e-129	9.3993e-129	AVR78_RS20350	hydroxymethylbilane synthase
AVR78_RS20375	97.2348	507.724	-2.3845	9.918e-07	1.2466e-07	AVR78_RS20375	diaminopimelate epimerase
AVR78_RS20380	74.6624	163.894	-1.1343	0.00032864	3.6385e-05	AVR78_RS20380	DUF484 domain-containing protein
AVR78_RS20425	125.016	281.759	-1.1723	1.0861e-05	1.299e-06	AVR78_RS20425	DNA helicase RecQ
AVR78_RS20460	88.5531	543.641	-2.618	1.8697e-11	2.8458e-12	AVR78_RS20460	HTH-type transcriptional regulator MetR
AVR78_RS20475	217.042	962.095	-2.1482	1.6195e-05	1.9239e-06	AVR78_RS20475	uridine phosphorylase
AVR78_RS20520	55.5627	126.931	-1.1919	0.0044152	0.00045934	AVR78_RS20520	transcription/translation regulatory transformer protein RfaH
AVR78_RS20530	144.116	402.762	-1.4827	0.016229	0.00163	AVR78_RS20530	4-hydroxy-3-polyprenylbenzoate decarboxylase
AVR78_RS20535	112.862	1265.47	-3.487	2.1684e-71	2.5255e-71	AVR78_RS20535	NAD(P)H-flavin reductase
AVR78_RS20605	52.09	128.675	-1.3046	0.023565	0.0023397	AVR78_RS20605	UDP-N-acetylmuramate dehydrogenase
AVR78_RS20650	59.0354	335.809	-2.508	2.8673e-06	3.5371e-07	AVR78_RS20650	preprotein translocase subunit SecE
AVR78_RS20655	43.4084	397.182	-3.1938	2.5636e-18	5.1711e-19	nusG	transcription termination/antitermination protein NusG
AVR78_RS20660	111.125	1486.91	-3.7421	1.5993e-100	3.5284e-100	AVR78_RS20660	50S ribosomal protein L11
AVR78_RS20665	225.724	2042.4	-3.1776	8.4658e-86	1.3776e-85	AVR78_RS20665	50S ribosomal protein L1
AVR78_RS20675	390.675	2630.33	-2.7512	1.0465e-62	9.6623e-63	AVR78_RS20675	50S ribosomal protein L10
AVR78_RS20680	185.788	1573.04	-3.0818	6.9464e-60	5.9362e-60	AVR78_RS20680	50S ribosomal protein L7/L12
AVR78_RS20685	576.463	3933.81	-2.7706	6.5905e-96	1.3382e-95	AVR78_RS20685	DNA-directed RNA polymerase subunit beta
AVR78_RS20690	616.399	3799.21	-2.6238	2.0979e-71	2.4497e-71	AVR78_RS20690	DNA-directed RNA polymerase subunit beta'
AVR78_RS20750	45.1447	113.331	-1.3279	0.044338	0.0043392	AVR78_RS20750	Rsd/AlgQ family anti-sigma factor
AVR78_RS20755	83.3441	714.51	-3.0998	1.0649e-28	3.1651e-29	nudC	NAD(+) diphosphatase
AVR78_RS20760	72.9261	514.001	-2.8173	6.5117e-15	1.1423e-15	AVR78_RS20760	uroporphyrinogen decarboxylase
AVR78_RS20775	449.711	1201.31	-1.4175	2.6591e-07	3.4124e-08	AVR78_RS20775	transcriptional regulator
AVR78_RS20795	97.2348	218.991	-1.1713	0.00010206	1.1648e-05	AVR78_RS20795	two-component system sensor histidine kinase ZraS
AVR78_RS20850	81.6077	516.79	-2.6628	7.869e-12	1.2175e-12	AVR78_RS20850	malate synthase A
AVR78_RS20855	144.116	306.866	-1.0904	1.1991e-07	1.5583e-08	AVR78_RS20855	isocitrate lyase
AVR78_RS20865	65.9807	170.869	-1.3728	0.027633	0.0027353	AVR78_RS20865	acetate operon transcriptional repressor IclR
AVR78_RS20890	38.1994	79.1575	-1.0512	0.0042038	0.00043894	AVR78_RS20890	hypothetical protein
AVR78_RS20930	81.6077	191.094	-1.2275	0.0011212	0.00012061	AVR78_RS20930	lysine-sensitive aspartokinase 3
AVR78_RS20940	166.688	1069.15	-2.6812	1.3468e-23	3.3176e-24	AVR78_RS20940	glucose-6-phosphate isomerase
AVR78_RS21040	86.8167	371.726	-2.0982	0.019078	0.0019099	AVR78_RS21040	LexA repressor
AVR78_RS21090	95.4984	193.186	-1.0164	2.4075e-06	2.9763e-07	AVR78_RS21090	replicative DNA helicase DnaB
AVR78_RS21100	95.4984	216.899	-1.1835	0.0001563	1.7627e-05	AVR78_RS21100	aromatic amino acid transaminase
AVR78_RS21125	149.325	773.442	-2.3728	2.9053e-09	4.0463e-10	AVR78_RS21125	single-stranded DNA-binding protein SSB1
AVR78_RS21215	31.254	197.719	-2.6613	2.3869e-05	2.8122e-06	AVR78_RS21215	membrane protein
AVR78_RS21270	62.5081	431.007	-2.7856	3.4376e-12	5.3988e-13	AVR78_RS21270	fimbrial chaperone protein
AVR78_RS21295	109.389	269.903	-1.303	0.00099467	0.00010743	AVR78_RS21295	cation/acetate symporter ActP
AVR78_RS21310	173.633	1495.97	-3.107	1.1118e-58	9.16e-59	AVR78_RS21310	acetate--CoA ligase
AVR78_RS21380	50.3537	222.478	-2.1435	0.040483	0.0039696	AVR78_RS21380	phosphonate metabolism protein PhnP
AVR78_RS21430	20.836	43.2402	-1.0533	0.03498	0.0034447	AVR78_RS21430	VOC family protein
AVR78_RS21445	243.087	3551.28	-3.8688	3.3999e-257	2.7373e-256	AVR78_RS21445	proline/glycine betaine transporter ProP
AVR78_RS21480	71.1897	336.158	-2.2394	0.0018333	0.00019488	AVR78_RS21480	curved DNA-binding protein
AVR78_RS21545	121.543	244.447	-1.008	7.8056e-08	1.024e-08	AVR78_RS21545	DUF1176 domain-containing protein
AVR78_RS21550	76.3987	364.055	-2.2525	0.00088026	9.534e-05	AVR78_RS21550	transcriptional regulator
AVR78_RS21570	378.521	4128.05	-3.447	3.3558e-221	2.0811e-220	AVR78_RS21570	aspartate ammonia-lyase
AVR78_RS21595	142.379	352.199	-1.3066	0.0001924	2.1609e-05	groES	molecular chaperone GroES
AVR78_RS21600	408.039	1575.48	-1.949	0.0071503	0.00073687	AVR78_RS21600	molecular chaperone GroEL
AVR78_RS21605	177.106	499.006	-1.4944	0.010417	0.001062	AVR78_RS21605	DUF4156 domain-containing protein
AVR78_RS21635	184.052	1007.43	-2.4525	3.7702e-14	6.4317e-15	AVR78_RS21635	fimbrial biogenesis outer membrane usher protein
AVR78_RS21660	272.605	731.597	-1.4242	8.3239e-05	9.5425e-06	AVR78_RS21660	elongation factor P
AVR78_RS21695	32.9904	167.033	-2.34	0.0087206	0.00089448	AVR78_RS21695	succinate dehydrogenase/fumarate reductase iron-sulfur subunit
AVR78_RS21700	138.907	814.59	-2.552	1.766e-14	3.049e-15	AVR78_RS21700	fumarate reductase (quinol) flavoprotein subunit
AVR78_RS21705	60.7717	137.741	-1.1805	0.0024477	0.00025816	AVR78_RS21705	elongation factor P--(R)-beta-lysine ligase
AVR78_RS21720	26.045	153.433	-2.5585	0.00080502	8.7479e-05	AVR78_RS21720	phosphatidylserine decarboxylase
AVR78_RS21780	147.588	296.056	-1.0043	2.7724e-09	3.8682e-10	AVR78_RS21780	DNA mismatch repair endonuclease MutL
AVR78_RS21790	79.8714	424.033	-2.4084	3.7079e-06	4.5472e-07	AVR78_RS21790	RNA-binding protein Hfq
AVR78_RS21800	194.47	803.431	-2.0466	0.0034109	0.00035712	AVR78_RS21800	FtsH protease activity modulator HflK
AVR78_RS21825	326.431	1973.71	-2.5961	6.166e-36	2.3818e-36	AVR78_RS21825	adenylosuccinate synthetase
AVR78_RS21830	46.881	787.39	-4.07	2.6376e-65	2.6602e-65	AVR78_RS21830	transcriptional regulator
AVR78_RS21835	210.097	1380.55	-2.7161	7.6665e-32	2.5699e-32	AVR78_RS21835	ribonuclease R
AVR78_RS21840	100.707	249.329	-1.3079	0.0017585	0.00018727	AVR78_RS21840	23S rRNA (guanosine(2251)-2'-O)-methyltransferase RlmB
AVR78_RS21850	20.836	735.084	-5.1408	1.1457e-89	2.03e-89	AVR78_RS21850	DUF1471 domain-containing protein
AVR78_RS21855	26.045	685.567	-4.7182	2.203e-74	2.7398e-74	AVR78_RS21855	biofilm peroxide resistance protein BsmA
AVR78_RS21915	291.704	1405.31	-2.2683	1.6653e-11	2.5422e-12	AVR78_RS21915	30S ribosomal protein S6
AVR78_RS21925	5.209	35.5686	-2.7715	0.048166	0.0046969	AVR78_RS21925	30S ribosomal protein S18
AVR78_RS21930	98.9711	447.048	-2.1754	0.0017131	0.00018257	AVR78_RS21930	50S ribosomal protein L9
AVR78_RS21935	81.6077	207.483	-1.3462	0.0093095	0.00095339	AVR78_RS21935	opacity-associated protein
AVR78_RS21940	121.543	336.855	-1.4707	0.021757	0.0021672	AVR78_RS21940	peptidyl-prolyl cis-trans isomerase
AVR78_RS21945	140.643	1639.99	-3.5436	3.8835e-96	7.9207e-96	AVR78_RS21945	D-serine/D-alanine/glycine transporter
AVR78_RS21980	102.444	705.095	-2.783	6.5809e-19	1.3597e-19	AVR78_RS21980	3'(2')%2C5'-bisphosphate nucleotidase CysQ
AVR78_RS21985	67.7171	164.243	-1.2782	0.0066268	0.00068431	AVR78_RS21985	YtfJ family protein
AVR78_RS21990	223.987	911.183	-2.0243	0.0040228	0.00042042	AVR78_RS21990	DUF1107 domain-containing protein
AVR78_RS22010	112.862	253.862	-1.1695	2.6954e-05	3.1716e-06	AVR78_RS22010	HlyC/CorC family transporter
AVR78_RS22015	107.653	274.087	-1.3482	0.0029433	0.00030901	AVR78_RS22015	peptide-methionine (S)-S-oxide reductase MsrA
AVR78_RS22030	38.1994	93.4547	-1.2907	0.046384	0.0045318	AVR78_RS22030	gamma-glutamylcyclotransferase
AVR78_RS22090	112.862	653.834	-2.5344	1.6504e-11	2.5204e-12	AVR78_RS22090	DUF615 domain-containing protein
AVR78_RS22160	0	108.798	-7.7655	2.7872e-18	5.6051e-19	AVR78_RS22160	type II toxin-antitoxin system antitoxin%2C RelB/DinJ family
AVR78_RS22165	72.9261	641.28	-3.1364	5.825e-27	1.6369e-27	AVR78_RS22165	type II toxin-antitoxin system RelE/ParE family toxin
AVR78_RS22175	281.286	563.169	-1.0015	1.8255e-16	3.3999e-17	AVR78_RS22175	anaerobic ribonucleoside-triphosphate reductase
AVR78_RS22210	309.068	867.245	-1.4885	0.00055402	6.0634e-05	AVR78_RS22210	2-iminobutanoate/2-iminopropanoate deaminase
AVR78_RS22260	20.836	117.167	-2.4914	0.0067306	0.00069471	AVR78_RS22260	DNA polymerase III subunit chi
AVR78_RS22265	196.206	824.005	-2.0703	0.0013397	0.00014341	AVR78_RS22265	cytosol aminopeptidase
AVR78_RS22270	31.254	63.8142	-1.0298	0.0079071	0.00081303	AVR78_RS22270	hypothetical protein
AVR78_RS22375	156.27	317.676	-1.0235	2.1826e-09	3.0546e-10	AVR78_RS22375	NAD(P)-dependent alcohol dehydrogenase
AVR78_RS22580	97.2348	220.386	-1.1805	0.00012688	1.4398e-05	AVR78_RS22580	cupin domain-containing protein
AVR78_RS22610	71.1897	174.356	-1.2923	0.0067055	0.00069228	AVR78_RS22610	hypothetical protein
AVR78_RS22620	135.434	303.728	-1.1652	3.6939e-06	4.5312e-07	AVR78_RS22620	ABC transporter ATP-binding protein/permease
AVR78_RS22625	105.916	607.107	-2.519	1.8267e-10	2.674e-11	AVR78_RS22625	hypothetical protein
AVR78_RS22630	39.9357	92.4085	-1.2103	0.019075	0.0019099	AVR78_RS22630	tryptophan--tRNA ligase
AVR78_RS22705	10.418	69.7423	-2.743	0.0069109	0.000713	AVR78_RS22705	winged helix family transcriptional regulator
AVR78_RS22710	8.68167	55.4451	-2.675	0.023425	0.0023273	AVR78_RS22710	TetR/AcrR family transcriptional regulator
AVR78_RS22720	57.2991	278.272	-2.2799	0.0022204	0.00023456	AVR78_RS22720	transcriptional regulator
AVR78_RS22805	246.56	616.871	-1.323	2.0556e-06	2.5481e-07	AVR78_RS22805	NAD-dependent succinate-semialdehyde dehydrogenase
AVR78_RS22835	13.8907	87.8753	-2.6613	0.004851	0.00050411	AVR78_RS22835	4-hydroxyphenylacetate 3-monooxygenase reductase subunit
AVR78_RS22840	72.9261	147.505	-1.0163	3.7594e-05	4.3987e-06	AVR78_RS22840	4-hydroxyphenylacetate 3-monooxygenase%2C oxygenase component
AVR78_RS22875	69.4534	178.889	-1.3649	0.0214	0.0021335	AVR78_RS22875	5-carboxymethyl-2-hydroxymuconate semialdehyde dehydrogenase
AVR78_RS22980	71.1897	185.863	-1.3845	0.02608	0.002585	AVR78_RS22980	MurR/RpiR family transcriptional regulator
AVR78_RS23050	20.836	154.479	-2.8903	6.3873e-06	7.7543e-07	AVR78_RS23050	primosomal protein DnaT
AVR78_RS23090	71.1897	153.782	-1.1111	0.00029462	3.2696e-05	AVR78_RS23090	YbaK/EbsC family protein
AVR78_RS23140	62.5081	125.536	-1.006	0.00011293	1.2843e-05	AVR78_RS23140	DNA polymerase III subunit psi
AVR78_RS23165	204.888	447.397	-1.1267	1.8188e-09	2.5547e-10	AVR78_RS23165	membrane protein
AVR78_RS23180	192.733	547.128	-1.5053	0.010088	0.0010297	AVR78_RS23180	NupC/NupG family nucleoside CNT transporter
AVR78_RS23185	114.598	948.146	-3.0485	2.0471e-35	7.7831e-36	AVR78_RS23185	2-deoxyribose-5-phosphate aldolase
AVR78_RS23190	111.125	532.831	-2.2615	4.2617e-05	4.9738e-06	AVR78_RS23190	thymidine phosphorylase
AVR78_RS23195	142.379	954.423	-2.7449	1.3701e-23	3.3731e-24	AVR78_RS23195	phosphopentomutase
AVR78_RS23220	53.8264	140.182	-1.3809	0.051009	0.0049667	AVR78_RS23220	phosphoserine phosphatase
AVR78_RS23230	135.434	1927.33	-3.8309	2.7874e-137	9.9935e-137	AVR78_RS23230	multifunctional transcriptional regulator/nicotinamide-nucleotide adenylyltransferase/ribosylnicotinamide kinase NadR
AVR78_RS23235	137.17	689.403	-2.3294	1.6146e-07	2.0901e-08	AVR78_RS23235	energy-dependent translational throttle protein EttA
AVR78_RS23245	147.588	394.044	-1.4168	0.0031437	0.00032952	AVR78_RS23245	murein transglycosylase
AVR78_RS23260	95.4984	254.211	-1.4125	0.016282	0.0016349	AVR78_RS23260	phosphoglycerate mutase GpmB
AVR78_RS23270	41.672	193.535	-2.2154	0.024294	0.0024105	AVR78_RS23270	hypothetical protein
AVR78_RS23290	354.212	2152.94	-2.6036	1.2339e-39	5.317e-40	AVR78_RS23290	two-component system response regulator ArcA
AVR78_RS23335	130.225	972.207	-2.9003	3.9414e-30	1.2262e-30	AVR78_RS23335	sodium:alanine symporter family protein
AVR78_RS23365	43.4084	97.2905	-1.1643	0.0087112	0.00089372	AVR78_RS23365	hypothetical protein
AVR78_RS23370	463.601	2470.27	-2.4137	2.173e-29	6.5692e-30	AVR78_RS23370	molecular chaperone DnaK
AVR78_RS23375	187.524	536.667	-1.517	0.015036	0.0015162	AVR78_RS23375	molecular chaperone DnaJ
AVR78_RS23380	201.415	18774.6	-6.5425	0	0	AVR78_RS23380	Na+/H+ antiporter NhaA
AVR78_RS23385	161.479	5946.58	-5.2026	0	0	AVR78_RS23385	transcriptional activator NhaR
AVR78_RS23390	189.261	402.413	-1.0883	1.1805e-09	1.669e-10	AVR78_RS23390	30S ribosomal protein S20
AVR78_RS23400	203.151	1184.92	-2.5442	4.8516e-20	1.0443e-20	AVR78_RS23400	bifunctional riboflavin kinase/FAD synthetase
AVR78_RS23405	197.942	1131.57	-2.5152	4.4915e-18	8.9849e-19	AVR78_RS23405	isoleucine--tRNA ligase
AVR78_RS23415	12.1543	95.5469	-2.9747	0.0001686	1.8995e-05	AVR78_RS23415	FKBP-type peptidyl-prolyl cis-trans isomerase
AVR78_RS23510	65.9807	821.215	-3.6376	1.6088e-52	1.0746e-52	AVR78_RS23510	carbamoyl-phosphate synthase small subunit
AVR78_RS23540	76.3987	188.653	-1.3041	0.006052	0.0006265	folA	type 3 dihydrofolate reductase
AVR78_RS23555	27.7814	169.822	-2.6118	0.00019165	2.153e-05	ksgA	16S rRNA (adenine(1518)-N(6)/adenine(1519)-N(6))-dimethyltransferase RsmA
AVR78_RS23565	130.225	545.036	-2.0653	0.010248	0.0010455	AVR78_RS23565	peptidylprolyl isomerase SurA
AVR78_RS23610	215.306	438.679	-1.0268	2.6136e-12	4.1216e-13	AVR78_RS23610	RNA polymerase-associated protein RapA
AVR78_RS23635	100.707	540.851	-2.4251	8.942e-08	1.1691e-08	AVR78_RS23635	arabinose operon transcriptional regulator AraC
AVR78_RS23660	187.524	536.667	-1.517	0.015036	0.0015162	AVR78_RS23660	transcriptional regulator SgrR
AVR78_RS23680	125.016	8885.86	-6.1513	0	0	AVR78_RS23680	MFS transporter
AVR78_RS23755	65.9807	416.013	-2.6565	1.0543e-09	1.4938e-10	AVR78_RS23755	acetolactate synthase small subunit
AVR78_RS23760	95.4984	2065.42	-4.4348	1.1899e-198	6.6589e-198	AVR78_RS23760	catabolite repressor/activator
AVR78_RS23820	109.389	306.517	-1.4865	0.038646	0.0037927	AVR78_RS23820	UDP-N-acetylmuramate--L-alanine ligase
AVR78_RS23840	164.952	965.582	-2.5494	8.5669e-17	1.6206e-17	AVR78_RS23840	cell division protein FtsZ
AVR78_RS23845	718.843	7638.18	-3.4095	0	0	AVR78_RS23845	UDP-3-O-[3-hydroxymyristoyl] N-acetylglucosamine deacetylase
AVR78_RS23855	296.913	904.906	-1.6077	0.045392	0.0044387	AVR78_RS23855	preprotein translocase subunit SecA
AVR78_RS23875	67.7171	144.367	-1.0921	0.0002944	3.2688e-05	AVR78_RS23875	dephospho-CoA kinase
AVR78_RS23930	95.4984	411.479	-2.1073	0.011382	0.0011576	AVR78_RS23930	aromatic amino acid transporter AroP
AVR78_RS23940	83.3441	405.9	-2.284	0.00019799	2.2214e-05	AVR78_RS23940	pyruvate dehydrogenase complex transcriptional repressor PdhR
AVR78_RS23945	236.142	1113.78	-2.2377	1.5635e-08	2.1059e-09	AVR78_RS23945	pyruvate dehydrogenase (acetyl-transferring)%2C homodimeric type
AVR78_RS23955	163.215	1788.89	-3.4542	1.6581e-97	3.4122e-97	AVR78_RS23955	dihydrolipoyl dehydrogenase
AVR78_RS23970	118.071	248.98	-1.0764	1.0717e-06	1.3437e-07	AVR78_RS23970	DUF3300 domain-containing protein
AVR78_RS23980	194.47	1517.59	-2.9642	3.7126e-50	2.2799e-50	AVR78_RS23980	bifunctional aconitate hydratase 2/2-methylisocitrate dehydratase
AVR78_RS23985	85.0804	190.048	-1.1595	0.00021658	2.4229e-05	AVR78_RS23985	hypothetical protein
AVR78_RS23995	24.3087	178.54	-2.8767	1.5521e-06	1.9308e-07	AVR78_RS23995	polyamine aminopropyltransferase
AVR78_RS24020	130.225	893.747	-2.7789	2.1406e-23	5.1978e-24	AVR78_RS24020	glucose/quinate/shikimate family membrane-bound PQQ-dependent dehydrogenase
AVR78_RS24030	123.28	259.79	-1.0754	6.0203e-07	7.6318e-08	AVR78_RS24030	hypoxanthine phosphoribosyltransferase
AVR78_RS24060	41.672	228.755	-2.4566	0.00028851	3.2057e-05	AVR78_RS24060	aspartate 1-decarboxylase
AVR78_RS24085	19.0997	169.474	-3.1494	2.5952e-08	3.454e-09	AVR78_RS24085	tRNA glutamyl-Q(34) synthetase GluQRS
AVR78_RS24090	138.907	980.925	-2.82	3.8069e-27	1.0771e-27	AVR78_RS24090	transcriptional regulator
AVR78_RS24095	83.3441	502.842	-2.593	3.0794e-10	4.4678e-11	AVR78_RS24095	DNA/RNA nuclease SfsA
AVR78_RS24225	83.3441	190.396	-1.1919	0.00048892	5.374e-05	AVR78_RS24225	glutamate-1-semialdehyde-2%2C1-aminomutase
AVR78_RS24260	182.315	1268.61	-2.7987	1.5688e-33	5.5766e-34	AVR78_RS24260	serine endoprotease DegQ
AVR78_RS24270	71.1897	369.983	-2.3777	3.5403e-05	4.1498e-06	AVR78_RS24270	hypothetical protein
AVR78_RS24290	833.441	3260.8	-1.9681	1.9246e-05	2.2775e-06	AVR78_RS24290	30S ribosomal protein S2
AVR78_RS24295	279.55	1082.4	-1.9531	0.0227	0.0022577	AVR78_RS24295	elongation factor Ts
AVR78_RS24305	88.5531	691.843	-2.9658	7.9209e-24	1.9723e-24	AVR78_RS24305	ribosome-recycling factor
AVR78_RS24310	111.125	246.888	-1.1517	1.908e-05	2.259e-06	AVR78_RS24310	1-deoxy-D-xylulose-5-phosphate reductoisomerase
AVR78_RS24335	316.013	1582.45	-2.3241	3.5151e-15	6.2209e-16	AVR78_RS24335	outer membrane protein assembly factor BamA
AVR78_RS24340	173.633	731.248	-2.0743	0.0022134	0.00023387	AVR78_RS24340	molecular chaperone Skp
AVR78_RS24345	144.116	736.13	-2.3527	1.9358e-08	2.593e-09	lpxD	UDP-3-O-(3-hydroxymyristoyl)glucosamine N-acyltransferase
AVR78_RS24375	69.4534	351.152	-2.338	0.00015018	1.6974e-05	AVR78_RS24375	acetyl-CoA carboxylase carboxyltransferase subunit alpha
AVR78_RS24395	10.418	96.9418	-3.218	1.2562e-05	1.5001e-06	AVR78_RS24395	Rho-binding antiterminator
AVR78_RS24405	43.4084	223.524	-2.3644	0.0016276	0.00017354	AVR78_RS24405	hypothetical protein
AVR78_RS24425	164.952	452.279	-1.4552	0.0050601	0.00052572	AVR78_RS24425	proline--tRNA ligase
AVR78_RS24450	53.8264	125.885	-1.2257	0.0079561	0.00081789	AVR78_RS24450	D-methionine ABC transporter%2C ATP-binding protein
AVR78_RS24515	355.949	1862.47	-2.3875	4.715e-21	1.0539e-21	AVR78_RS24515	murein transglycosylase D
AVR78_RS24525	102.444	220.734	-1.1075	1.2775e-05	1.5251e-06	AVR78_RS24525	class I SAM-dependent methyltransferase
AVR78_RS24535	76.3987	164.243	-1.1042	0.00015377	1.7355e-05	AVR78_RS24535	DNA polymerase III subunit epsilon
AVR78_RS24570	67.7171	169.474	-1.3235	0.012933	0.0013118	AVR78_RS24570	phosphoheptose isomerase
AVR78_RS24580	111.125	239.565	-1.1082	5.6099e-06	6.8304e-07	AVR78_RS24580	transpeptidase
AVR78_RS24590	112.862	308.958	-1.4529	0.019564	0.0019573	AVR78_RS24590	NADH:ubiquinone reductase (Na(+)-transporting) subunit A
AVR78_RS24595	65.9807	155.177	-1.2338	0.0037441	0.00039192	AVR78_RS24595	NADH:ubiquinone reductase (Na(+)-transporting) subunit B
AVR78_RS24615	97.2348	258.046	-1.4081	0.014205	0.0014358	AVR78_RS24615	NADH:ubiquinone reductase (Na(+)-transporting) subunit F
AVR78_RS24645	48.6174	285.246	-2.5527	5.631e-06	6.8544e-07	AVR78_RS24645	xanthine phosphoribosyltransferase
AVR78_RS24655	90.2894	182.725	-1.017	4.6009e-06	5.6272e-07	AVR78_RS24655	Crl family RNA polymerase assembly factor
AVR78_RS24730	48.6174	305.82	-2.6531	1.849e-07	2.3902e-08	AVR78_RS24730	4-aminobutyrate--2-oxoglutarate transaminase
AVR78_RS24795	31.254	557.59	-4.1571	8.3835e-49	4.8885e-49	AVR78_RS24795	phospho-2-dehydro-3-deoxyheptonate aldolase
AVR78_RS24830	333.376	948.844	-1.509	0.00084162	9.1283e-05	AVR78_RS24830	LuxR family transcriptional regulator
AVR78_RS25125	60.7717	153.084	-1.3329	0.020935	0.0020894	AVR78_RS25125	delta-aminolevulinic acid dehydratase
AVR78_RS25130	43.4084	90.665	-1.0626	0.0026205	0.00027581	AVR78_RS25130	D-alanyl-D-alanine-carboxypeptidase/endopeptidase AmpH
AVR78_RS25170	45.1447	547.477	-3.6002	1.1354e-34	4.1916e-35	AVR78_RS25170	MFS transporter
AVR78_RS25175	39.9357	84.0395	-1.0734	0.0044063	0.00045851	AVR78_RS25175	anti-adapter protein IraP
AVR78_RS25185	125.016	337.204	-1.4315	0.0090032	0.00092285	AVR78_RS25185	hypothetical protein
AVR78_RS25205	88.5531	389.162	-2.1358	0.0078849	0.00081094	AVR78_RS25205	shikimate kinase AroL
AVR78_RS25215	158.006	358.475	-1.1819	1.0868e-06	1.3619e-07	AVR78_RS25215	hypothetical protein
AVR78_RS25220	86.8167	176.797	-1.026	8.726e-06	1.0499e-06	AVR78_RS25220	pyrimidine/purine nucleoside phosphorylase
AVR78_RS25245	100.707	226.314	-1.1682	7.0932e-05	8.1745e-06	AVR78_RS25245	DNA-binding response regulator
AVR78_RS25255	112.862	276.528	-1.2929	0.00064973	7.0889e-05	AVR78_RS25255	branched-chain amino acid transporter carrier protein BrnQ
AVR78_RS25320	168.424	1098.09	-2.7048	3.4829e-25	9.1176e-26	AVR78_RS25320	peroxiredoxin
AVR78_RS25340	116.334	286.292	-1.2992	0.00062632	6.8433e-05	AVR78_RS25340	tRNA guanosine(34) transglycosylase Tgt
AVR78_RS25350	140.643	571.887	-2.0237	0.023021	0.0022886	AVR78_RS25350	protein translocase subunit SecD
AVR78_RS25355	118.071	308.958	-1.3878	0.0044684	0.00046477	AVR78_RS25355	protein translocase subunit SecF
AVR78_RS25370	140.643	775.534	-2.4632	1.6748e-11	2.556e-12	AVR78_RS25370	nucleoside-specific channel-forming protein Tsx
AVR78_RS25400	57.2991	120.654	-1.0743	0.00065689	7.1637e-05	AVR78_RS25400	thiamine-phosphate kinase
AVR78_RS25410	88.5531	443.561	-2.3245	3.0598e-05	3.5939e-06	AVR78_RS25410	aldo/keto reductase
AVR78_RS25415	130.225	333.717	-1.3576	0.001358	0.00014533	AVR78_RS25415	1-deoxy-D-xylulose-5-phosphate synthase
AVR78_RS25420	31.254	155.177	-2.3118	0.015767	0.0015864	AVR78_RS25420	(2E%2C6E)-farnesyl diphosphate synthase
AVR78_RS25505	125.016	1427.97	-3.5138	4.8792e-82	7.3413e-82	AVR78_RS25505	protoheme IX farnesyltransferase
AVR78_RS25510	13.8907	145.064	-3.3845	7.1086e-09	9.7493e-10	AVR78_RS25510	cytochrome o ubiquinol oxidase subunit IV
AVR78_RS25515	17.3633	550.964	-4.9878	4.2138e-65	4.2221e-65	AVR78_RS25515	cytochrome o ubiquinol oxidase subunit III
AVR78_RS25520	220.515	3403.42	-3.948	2.9854e-258	2.4909e-257	AVR78_RS25520	cytochrome o ubiquinol oxidase subunit I
AVR78_RS25525	116.334	2409.94	-4.3726	1.2246e-225	7.8053e-225	AVR78_RS25525	cytochrome o ubiquinol oxidase subunit II
AVR78_RS25535	59.0354	148.202	-1.3279	0.021473	0.0021403	AVR78_RS25535	hypothetical protein
AVR78_RS25540	218.778	989.992	-2.1779	2.6641e-06	3.2891e-07	AVR78_RS25540	BolA family transcriptional regulator
AVR78_RS25550	588.618	2348.92	-1.9966	3.5884e-05	4.2019e-06	AVR78_RS25550	trigger factor
AVR78_RS25555	137.17	1484.81	-3.4362	4.7597e-80	6.8044e-80	AVR78_RS25555	ATP-dependent Clp endopeptidase%2C proteolytic subunit ClpP
AVR78_RS25560	317.749	2009.97	-2.6612	2.1969e-41	1.0122e-41	AVR78_RS25560	ATP-dependent Clp protease ATP-binding subunit ClpX
AVR78_RS25565	451.447	1723.68	-1.9329	0.010336	0.001054	AVR78_RS25565	endopeptidase La
AVR78_RS25570	171.897	921.644	-2.4227	3.4559e-12	5.4257e-13	AVR78_RS25570	DNA-binding protein HU-beta
AVR78_RS25575	218.778	654.531	-1.581	0.046787	0.0045692	AVR78_RS25575	peptidylprolyl isomerase
AVR78_RS25595	72.9261	156.223	-1.0991	0.00019695	2.2108e-05	AVR78_RS25595	peptide ABC transporter substrate-binding protein
AVR78_RS25605	126.752	310.353	-1.2919	0.00029406	3.2658e-05	AVR78_RS25605	pyridoxal-phosphate dependent protein
AVR78_RS25740	123.28	290.128	-1.2348	7.6103e-05	8.7572e-06	lacI	lac repressor
AVR78_RS25745	0	11.8562	-4.5676	0.019443	0.001946	AVR78_RS25745	type B 50S ribosomal protein L31
AVR78_RS25755	38.1994	313.84	-3.0384	1.2442e-12	1.9839e-13	AVR78_RS25755	N-acetyltransferase
AVR78_RS25775	53.8264	2875.47	-5.7393	0	0	AVR78_RS25775	maltose O-acetyltransferase
AVR78_RS25780	57.2991	971.161	-4.0831	1.1862e-80	1.7172e-80	AVR78_RS25780	transcriptional regulator
AVR78_RS25785	305.595	3278.58	-3.4234	1.3883e-172	6.7062e-172	AVR78_RS25785	Hha toxicity attenuator
AVR78_RS25790	447.974	2581.16	-2.5265	3.6638e-40	1.6151e-40	AVR78_RS25790	multidrug efflux RND transporter permease subunit
AVR78_RS25795	288.232	1148.31	-1.9942	0.0042492	0.00044236	AVR78_RS25795	MexE family multidrug efflux RND transporter periplasmic adaptor subunit
AVR78_RS25830	57.2991	140.879	-1.2979	0.016117	0.0016195	AVR78_RS25830	adenine phosphoribosyltransferase
AVR78_RS25870	177.106	417.408	-1.2368	2.2955e-06	2.8409e-07	AVR78_RS25870	Kef family K(+) transporter
AVR78_RS25895	26.045	154.828	-2.5716	0.00063925	6.9829e-05	AVR78_RS25895	Cys-tRNA(Pro) deacylase
AVR78_RS25910	48.6174	101.126	-1.0566	0.0013368	0.00014313	AVR78_RS25910	HTH-type transcriptional regulator CueR
AVR78_RS25915	48.6174	115.423	-1.2474	0.015048	0.001517	AVR78_RS25915	NfeD family protein
AVR78_RS26030	95.4984	221.083	-1.211	0.00029355	3.261e-05	AVR78_RS26030	integrase
AVR78_RS26035	93.7621	766.119	-3.0305	2.4415e-28	7.1912e-29	AVR78_RS26035	hypothetical protein
AVR78_RS26140	263.923	1255.01	-2.2495	8.1761e-10	1.1631e-10	AVR78_RS26140	hypothetical protein
AVR78_RS26165	180.579	1991.14	-3.4629	4.2766e-109	1.0903e-108	AVR78_RS26165	DUF4065 domain-containing protein
AVR78_RS26170	72.9261	879.799	-3.5927	2.3023e-54	1.6483e-54	AVR78_RS26170	hypothetical protein
AVR78_RS26190	50.3537	107.752	-1.0975	0.0019365	0.00020537	AVR78_RS26190	hydroxyisourate hydrolase
AVR78_RS26215	609.454	1743.91	-1.5167	1.141e-05	1.3635e-06	AVR78_RS26215	DUF1471 domain-containing protein
AVR78_RS26310	19.0997	213.411	-3.482	2.4691e-13	4.0453e-14	AVR78_RS26310	sucrose operon repressor
AVR78_RS26315	95.4984	463.786	-2.2799	7.8353e-05	9.0026e-06	AVR78_RS26315	sucrose-6-phosphate hydrolase
AVR78_RS26320	88.5531	979.182	-3.467	9.1833e-55	6.6786e-55	AVR78_RS26320	PTS sucrose transporter subunit IIBC
AVR78_RS26325	187.524	4121.42	-4.458	0	0	AVR78_RS26325	sucrose porin
AVR78_RS26330	166.688	859.574	-2.3665	5.6699e-10	8.1183e-11	AVR78_RS26330	aminoimidazole riboside kinase
AVR78_RS26630	92.0258	866.548	-3.2352	1.2166e-39	5.2473e-40	AVR78_RS26630	oxygen-insensitive NAD(P)H nitroreductase
AVR78_RS26635	20.836	459.95	-4.4643	3.2816e-46	1.7864e-46	AVR78_RS26635	hypothetical protein
AVR78_RS26640	156.27	3338.21	-4.417	0	0	AVR78_RS26640	TetR/AcrR family transcriptional regulator
AVR78_RS26645	293.441	1835.27	-2.6449	8.1784e-37	3.2579e-37	AVR78_RS26645	outer membrane protein romA
AVR78_RS26655	45.1447	227.36	-2.3323	0.0025045	0.00026397	AVR78_RS26655	DUF1158 domain-containing protein
AVR78_RS26810	64.2444	1200.96	-4.2245	2.5597e-106	6.118e-106	AVR78_RS26810	PhzF family phenazine biosynthesis protein
AVR78_RS26835	26.045	54.7477	-1.0718	0.021213	0.0021162	AVR78_RS26835	transcriptional regulator BetI
AVR78_RS27010	15.627	120.654	-2.9488	3.2555e-05	3.8199e-06	AVR78_RS27010	XRE family transcriptional regulator
AVR78_RS27015	10.418	61.0245	-2.5503	0.03624	0.0035657	AVR78_RS27015	type II toxin-antitoxin system RelE/ParE family toxin
AVR78_RS27070	72.9261	186.561	-1.3551	0.015933	0.0016024	AVR78_RS27070	recombinase
AVR78_RS27100	178.842	803.78	-2.1681	3.5493e-05	4.1592e-06	AVR78_RS27100	hypothetical protein
AVR78_RS27105	159.743	1227.81	-2.9423	8.9716e-40	3.8951e-40	AVR78_RS27105	cupin domain-containing protein
AVR78_RS27110	138.907	829.236	-2.5777	1.797e-15	3.2151e-16	AVR78_RS27110	DUF86 domain-containing protein
AVR78_RS27115	220.515	939.777	-2.0914	0.00025748	2.8666e-05	AVR78_RS27115	nucleotidyltransferase
AVR78_RS27205	26.045	54.399	-1.0626	0.019764	0.0019767	AVR78_RS27205	C2H2-type zinc finger protein
AVR78_RS27235	26.045	57.5374	-1.1435	0.03626	0.003567	AVR78_RS27235	replication protein
AVR78_RS27370	39.9357	89.6188	-1.1661	0.012094	0.0012281	AVR78_RS27370	hypothetical protein
AVR78_RS27405	41.672	496.914	-3.5758	4.4267e-31	1.4316e-31	AVR78_RS27405	chromosome partitioning protein ParB
AVR78_RS27410	60.7717	2145.27	-5.1416	5.9798e-258	4.9002e-257	AVR78_RS27410	chromosome partitioning protein ParA
AVR78_RS27415	145.852	1974.06	-3.7586	2.8355e-134	9.5679e-134	AVR78_RS27415	replication initiation protein
AVR78_RS27610	83.3441	349.409	-2.0678	0.038304	0.0037616	AVR78_RS27610	hypothetical protein
AVR78_RS27710	5.209	36.6147	-2.8133	0.038123	0.0037446	AVR78_RS27710	PIN domain nuclease
AVR78_RS27715	118.071	308.261	-1.3845	0.0041626	0.00043473	AVR78_RS27715	ATP-dependent endonuclease
AVR78_RS27820	29.5177	62.7681	-1.0885	0.016327	0.0016388	AVR78_RS27820	DNA-binding response regulator
AVR78_RS27910	5.209	63.4655	-3.6069	2.7672e-05	3.2552e-06	AVR78_RS27910	hypothetical protein
AVR78_RS27935	32.9904	155.525	-2.237	0.0349	0.0034376	AVR78_RS27935	hypothetical protein
AVR78_RS27940	5.209	38.707	-2.8935	0.023552	0.0023389	AVR78_RS27940	DUF1778 domain-containing protein
AVR78_RS27955	1.73633	33.4763	-4.269	0.00022097	2.4703e-05	AVR78_RS27955	IS5-like element IS903B family transposase
AVR78_RS27965	27.7814	1679.74	-5.918	8.5544e-234	5.6893e-233	AVR78_RS27965	VGR-related protein
AVR78_RS28010	163.215	768.211	-2.2347	3.0466e-06	3.7543e-07	AVR78_RS28010	class A extended-spectrum beta-lactamase SHV-18
AVR78_RS28020	965.402	3685.53	-1.9327	0.00017875	2.009e-05	AVR78_RS28020	Tn3-like element Tn5403 family transposase
AVR78_RS28040	373.312	2486.31	-2.7356	7.5359e-58	6.0039e-58	AVR78_RS28040	hypothetical protein
AVR78_RS28045	46.881	1960.8	-5.3863	2.9653e-249	2.1262e-248	AVR78_RS28045	hypothetical protein
AVR78_RS28050	83.3441	440.074	-2.4006	3.1288e-06	3.8524e-07	AVR78_RS28050	hypothetical protein
AVR78_RS28060	92.0258	4459.67	-5.5988	0	0	AVR78_RS28060	antitoxin
AVR78_RS28065	166.688	8052.44	-5.5942	0	0	AVR78_RS28065	mRNA interferase PemK
AVR78_RS28070	36.463	2384.49	-6.0311	0	0	AVR78_RS28070	peptidase
AVR78_RS28075	569.518	3721.1	-2.7079	1.0092e-81	1.4987e-81	AVR78_RS28075	DNA polymerase V subunit UmuC
AVR78_RS28155	288.232	9952.22	-5.1097	0	0	AVR78_RS28155	chromosome partitioning protein ParA
AVR78_RS28160	71.1897	1077.87	-3.9204	8.152e-82	1.2146e-81	AVR78_RS28160	chromosome partitioning protein ParB
AVR78_RS28165	159.743	1117.62	-2.8066	4.3067e-30	1.3372e-30	AVR78_RS28165	phospholipase D family protein
AVR78_RS28170	32.9904	185.166	-2.4887	0.00068514	7.4647e-05	AVR78_RS28170	hypothetical protein
AVR78_RS28185	17.3633	531.436	-4.9358	5.6418e-62	5.0765e-62	AVR78_RS28185	hypothetical protein
AVR78_RS28190	118.071	1221.88	-3.3714	1.2396e-62	1.1423e-62	AVR78_RS28190	DUF3085 domain-containing protein
AVR78_RS28195	93.7621	2423.2	-4.6918	9.9884e-256	7.9029e-255	AVR78_RS28195	hypothetical protein
AVR78_RS28200	184.052	969.766	-2.3975	5.5181e-12	8.5927e-13	AVR78_RS28200	XRE family transcriptional regulator
AVR78_RS28205	83.3441	498.657	-2.5809	6.0406e-10	8.6357e-11	AVR78_RS28205	hypothetical protein
AVR78_RS28210	206.624	1347.42	-2.7051	1.5152e-30	4.792e-31	AVR78_RS28210	DUF4942 domain-containing protein
AVR78_RS28215	145.852	2566.17	-4.137	1.0054e-215	6.0709e-215	AVR78_RS28215	hypothetical protein
AVR78_RS28220	71.1897	337.553	-2.2454	0.0015828	0.00016888	AVR78_RS28220	hypothetical protein
AVR78_RS28225	38.1994	185.863	-2.2826	0.012	0.0012191	AVR78_RS28225	hypothetical protein
AVR78_RS28230	97.2348	1388.22	-3.8356	1.0559e-99	2.2538e-99	AVR78_RS28230	DUF1380 domain-containing protein
AVR78_RS28235	135.434	356.383	-1.3958	0.0028348	0.0002979	AVR78_RS28235	hypothetical protein
AVR78_RS28240	83.3441	1445.76	-4.1166	3.6519e-121	1.054e-120	AVR78_RS28240	antirestriction protein
AVR78_RS28245	46.881	213.063	-2.1842	0.027183	0.0026919	AVR78_RS28245	hypothetical protein
AVR78_RS28250	74.6624	2915.23	-5.2871	0	0	AVR78_RS28250	hypothetical protein
AVR78_RS28255	230.933	3989.61	-4.1107	0	0	AVR78_RS28255	single-stranded DNA-binding protein
AVR78_RS28265	383.73	12276	-4.9996	0	0	AVR78_RS28265	hypothetical protein
AVR78_RS28275	93.7621	1675.91	-4.1598	3.7858e-143	1.4599e-142	AVR78_RS28275	hypothetical protein
AVR78_RS28280	609.454	13946.7	-4.5163	0	0	AVR78_RS28280	hypothetical protein
AVR78_RS28320	6.94534	51.958	-2.9032	0.0082477	0.00084692	AVR78_RS28320	hypothetical protein
AVR78_RS28390	128.489	1316.73	-3.3572	1.6171e-66	1.6981e-66	AVR78_RS28390	hypothetical protein
AVR78_RS28400	378.521	1561.53	-2.0445	5.0588e-05	5.8682e-06	AVR78_RS28400	RepA protein%2C IncFII family
AVR78_RS28425	1132.09	8502.28	-2.9089	4.235e-253	3.186e-252	AVR78_RS28425	aminoglycoside nucleotidyltransferase ANT(2'')-Ia
AVR78_RS28430	776.142	4547.2	-2.5506	3.1824e-73	3.8841e-73	AVR78_RS28430	APH(3') family aminoglycoside O-phosphotransferase AphA16
AVR78_RS28435	243.087	3768.52	-3.9545	8.6259e-287	7.7617e-286	AVR78_RS28435	ANT(3'') family aminoglycoside nucleotidyltransferase
AVR78_RS28525	19.0997	107.054	-2.4867	0.010009	0.0010219	AVR78_RS28525	hypothetical protein
AVR78_RS28535	24.3087	150.643	-2.6316	0.00033947	3.7556e-05	AVR78_RS28535	hypothetical protein
AVR78_RS28585	8.68167	69.0449	-2.9915	0.0012248	0.00013145	AVR78_RS28585	DUF159 family protein
AVR78_RS28725	0	25.1072	-5.65	9.2081e-05	1.0525e-05	AVR78_RS28725	hypothetical protein

## Sheet: KEGG_down
Term	Sample number	Background number	P-value	Corrected P-value	UniGenes	KO
Carbon metabolism	64	126	0.000530988	0.0337814	AVR78_RS24375 AVR78_RS23955 AVR78_RS08950 AVR78_RS15335 AVR78_RS11565 AVR78_RS21310 AVR78_RS12740 AVR78_RS00630 AVR78_RS14250 AVR78_RS10425 AVR78_RS00635 AVR78_RS00845 AVR78_RS23260 AVR78_RS00610 AVR78_RS11460 AVR78_RS10670 AVR78_RS11465 AVR78_RS00615 AVR78_RS19935 AVR78_RS12355 AVR78_RS09595 AVR78_RS23220 AVR78_RS09355 AVR78_RS16995 AVR78_RS21700 AVR78_RS15420 AVR78_RS23980 AVR78_RS17575 AVR78_R…	kpr:KPR_1129 kpr:KPR_1049 kpr:KPR_3159 kpr:KPR_4605 kpr:KPR_2000 kpr:KPR_0461 kpr:KPR_1397 kpr:KPR_3846 kpr:KPR_4132 kpr:KPR_1597 kpr:KPR_3845 kpr:KPR_3814 kpr:KPR_0928 kpr:KPR_3850 kpr:KPR_2019 kpr:KPR_1550 kpr:KPR_2018 kpr:KPR_3849 kpr:KPR_0182 kpr:KPR_1908 kpr:KPR_3282 kpr:KPR_0921 kpr:KPR_3242 kpr:KPR_4850 kpr:KPR_0532 kpr:KPR_4619 kpr:KPR_1053 kpr:KPR_3194 kpr:KPR_4851 kpr:KPR_4613 kpr:KPR_2…
Oxidative phosphorylation	31	47	0.000742449	0.0337814	AVR78_RS12530 AVR78_RS19490 AVR78_RS11385 AVR78_RS11380 AVR78_RS11360 AVR78_RS25510 AVR78_RS11400 AVR78_RS11405 AVR78_RS25515 AVR78_RS00610 AVR78_RS00625 AVR78_RS00615 AVR78_RS00650 AVR78_RS21700 AVR78_RS19460 AVR78_RS19465 AVR78_RS11395 AVR78_RS19480 AVR78_RS11390 AVR78_RS11370 AVR78_RS11350 AVR78_RS11410 AVR78_RS11355 AVR78_RS00620 AVR78_RS25520 AVR78_RS25525 AVR78_RS19475 AVR78_RS19470 AVR78_R…	kpr:KPR_1877 kpr:KPR_0102 kpr:KPR_2033 kpr:KPR_2034 kpr:KPR_2038 kpr:KPR_4329 kpr:KPR_2030 kpr:KPR_2029 kpr:KPR_4328 kpr:KPR_3850 kpr:KPR_3847 kpr:KPR_3849 kpr:KPR_3842 kpr:KPR_0532 kpr:KPR_0096 kpr:KPR_0097 kpr:KPR_2031 kpr:KPR_0100 kpr:KPR_2032 kpr:KPR_2036 kpr:KPR_2040 kpr:KPR_2028 kpr:KPR_2039 kpr:KPR_3848 kpr:KPR_4327 kpr:KPR_4326 kpr:KPR_0099 kpr:KPR_0098 kpr:KPR_4330 kpr:KPR_0095 kpr:KPR_0…
Ribosome	40	72	0.00168037	0.0509712	AVR78_RS16030 AVR78_RS17215 AVR78_RS16655 AVR78_RS17210 AVR78_RS17220 AVR78_RS21915 AVR78_RS16855 AVR78_RS08605 AVR78_RS21930 AVR78_RS17290 AVR78_RS20680 AVR78_RS24290 AVR78_RS13030 AVR78_RS23390 AVR78_RS21925 AVR78_RS17265 AVR78_RS17320 AVR78_RS17190 AVR78_RS17260 AVR78_RS17175 AVR78_RS17170 AVR78_RS17205 AVR78_RS11065 AVR78_RS17325 AVR78_RS17155 AVR78_RS17200 AVR78_RS17225 AVR78_RS01830 AVR78_R…	kpr:KPR_4507 kpr:KPR_0766 kpr:KPR_4788 kpr:KPR_0767 kpr:KPR_0765 kpr:KPR_0570 kpr:KPR_4821 kpr:KPR_2725 kpr:KPR_0573 kpr:KPR_0751 kpr:KPR_0299 kpr:KPR_1113 kpr:KPR_1344 kpr:KPR_0952 kpr:KPR_0572 kpr:KPR_0756 kpr:KPR_0746 kpr:KPR_0771 kpr:KPR_0757 kpr:KPR_0773 kpr:KPR_0774 kpr:KPR_0768 kpr:KPR_1472 kpr:KPR_0745 kpr:KPR_0777 kpr:KPR_0769 kpr:KPR_0764 kpr:KPR_3640 kpr:KPR_0752 kpr:KPR_4187 kpr:KPR_0…
RNA degradation	14	16	0.00389968	0.0887178	AVR78_RS19935 AVR78_RS12530 AVR78_RS20425 AVR78_RS16520 AVR78_RS20225 AVR78_RS16510 AVR78_RS23370 AVR78_RS20240 AVR78_RS21790 AVR78_RS21835 AVR78_RS21600 AVR78_RS14785 AVR78_RS14250 AVR78_RS02825	kpr:KPR_0182 kpr:KPR_1877 kpr:KPR_0267 kpr:KPR_4767 kpr:KPR_0235 kpr:KPR_4765 kpr:KPR_0948 kpr:KPR_0237 kpr:KPR_0546 kpr:KPR_0554 kpr:KPR_0511 kpr:KPR_1794 kpr:KPR_4132 kpr:KPR_2129
Biosynthesis of antibiotics	91	222	0.00778371	0.141664	AVR78_RS08730 AVR78_RS00630 AVR78_RS11545 AVR78_RS00635 AVR78_RS09595 AVR78_RS19935 AVR78_RS07185 AVR78_RS23220 AVR78_RS09355 AVR78_RS23980 AVR78_RS17575 AVR78_RS04005 AVR78_RS14950 AVR78_RS16885 AVR78_RS19435 AVR78_RS00645 AVR78_RS00640 AVR78_RS05385 AVR78_RS15415 AVR78_RS21980 AVR78_RS10410 AVR78_RS21100 AVR78_RS08635 AVR78_RS12620 AVR78_RS15335 AVR78_RS12435 AVR78_RS14250 AVR78_RS00845 AVR78_R…	kpr:KPR_3118 kpr:KPR_3846 kpr:KPR_2004 kpr:KPR_3845 kpr:KPR_3282 kpr:KPR_0182 kpr:KPR_2946 kpr:KPR_0921 kpr:KPR_3242 kpr:KPR_1053 kpr:KPR_3194 kpr:KPR_2285 kpr:KPR_1763 kpr:KPR_4827 kpr:KPR_0093 kpr:KPR_3843 kpr:KPR_3844 kpr:KPR_2755 kpr:KPR_4618 kpr:KPR_0584 kpr:KPR_0242 kpr:KPR_0423 kpr:KPR_3102 kpr:KPR_1428 kpr:KPR_4605 kpr:KPR_1892 kpr:KPR_4132 kpr:KPR_3814 kpr:KPR_2827 kpr:KPR_4348 kpr:KPR_2…
Citrate cycle (TCA cycle)	20	33	0.0119085	0.180612	AVR78_RS00645 AVR78_RS23945 AVR78_RS00640 AVR78_RS23955 AVR78_RS04220 AVR78_RS00635 AVR78_RS05385 AVR78_RS00620 AVR78_RS00595 AVR78_RS00630 AVR78_RS00625 AVR78_RS23980 AVR78_RS17575 AVR78_RS21700 AVR78_RS21695 AVR78_RS00610 AVR78_RS00615 AVR78_RS05155 AVR78_RS16885 AVR78_RS03155	kpr:KPR_3843 kpr:KPR_1047 kpr:KPR_3844 kpr:KPR_1049 kpr:KPR_2324 kpr:KPR_3845 kpr:KPR_2755 kpr:KPR_3848 kpr:KPR_3851 kpr:KPR_3846 kpr:KPR_3847 kpr:KPR_1053 kpr:KPR_3194 kpr:KPR_0532 kpr:KPR_0531 kpr:KPR_3850 kpr:KPR_3849 kpr:KPR_2827 kpr:KPR_4827 kpr:KPR_2189
Methane metabolism	19	32	0.0162707	0.211519	AVR78_RS19935 AVR78_RS19750 AVR78_RS11460 AVR78_RS12740 AVR78_RS21310 AVR78_RS08510 AVR78_RS15415 AVR78_RS16385 AVR78_RS08635 AVR78_RS14250 AVR78_RS11465 AVR78_RS10670 AVR78_RS00775 AVR78_RS23260 AVR78_RS23220 AVR78_RS19745 AVR78_RS16885 AVR78_RS19740 AVR78_RS07380	kpr:KPR_0182 kpr:KPR_0153 kpr:KPR_2019 kpr:KPR_1397 kpr:KPR_0461 kpr:KPR_2708 kpr:KPR_4618 kpr:KPR_3102 kpr:KPR_3102 kpr:KPR_4132 kpr:KPR_2018 kpr:KPR_1550 kpr:KPR_3826 kpr:KPR_0928 kpr:KPR_0921 kpr:KPR_0153 kpr:KPR_4827 kpr:KPR_0152 kpr:KPR_2990
