# Supplementary material for: Coexistence of Microbial Species in Structured Communities by Forming a Hawk-Dove Game Like Interactive Relationship
Source: Front Microbiol. 2019 Apr 16;10:807. doi: 10.3389/fmicb.2019.00807 (PMC6477097; doi:10.3389/fmicb.2019.00807)
Supplement: Supplementary file 4 [file Table_4.XLSX]

## Sheet: PAKP_KPvsKP.DEG_up
Supplementary Dataset 4. Significantly differentially expressed genes of K. pneumoniae when statically cocultured with P. aeruginosa in LB broth for 3 days compared to 1 day.
Gene_id	readcount_PAKP_KP	readcount_KP	log2.Fold_change.	pvalue	qvalue	Gene_name	Gene_description
AVR78_RS00010	254.334	106.312	1.2584	9.1587e-79	6.604e-79	AVR78_RS00010	sugar ABC transporter ATP-binding protein
AVR78_RS00015	71.8771	22.7515	1.6596	1.6466e-26	2.5204e-27	AVR78_RS00015	ABC transporter permease
AVR78_RS00020	149.283	59.1539	1.3355	2.9868e-48	9.5091e-49	AVR78_RS00020	sugar ABC transporter
AVR78_RS00040	121.638	50.467	1.2692	9.4783e-39	2.1577e-39	AVR78_RS00040	histidine-type phosphatase
AVR78_RS00060	116.109	28.1291	2.0453	9.6194e-46	2.7957e-46	AVR78_RS00060	metal-dependent hydrolase
AVR78_RS00065	77.4061	33.5068	1.208	9.8706e-25	1.4082e-25	AVR78_RS00065	PucR family transcriptional regulator
AVR78_RS00070	55.2901	26.8882	1.0401	4.9907e-17	5.3951e-18	AVR78_RS00070	cytosine permease
AVR78_RS00085	154.812	72.3912	1.0966	8.7939e-46	2.5613e-46	AVR78_RS00085	D-isomer specific 2-hydroxyacid dehydrogenase
AVR78_RS00090	93.9932	33.9204	1.4704	2.2714e-32	4.1967e-33	AVR78_RS00090	sugar kinase
AVR78_RS00095	99.5222	19.4422	2.3558	9.7305e-42	2.4631e-42	AVR78_RS00095	ABC transporter permease
AVR78_RS00100	77.4061	16.9602	2.1903	6.1699e-32	1.1183e-32	AVR78_RS00100	ABC transporter permease
AVR78_RS00105	99.5222	37.2298	1.4186	1.2405e-33	2.4139e-34	AVR78_RS00105	sugar ABC transporter ATP-binding protein
AVR78_RS00115	304.096	141.887	1.0998	2.7458e-88	2.4419e-88	AVR78_RS00115	biotin sulfoxide reductase
AVR78_RS00140	88.4641	43.021	1.0401	2.7115e-26	4.1196e-27	AVR78_RS00140	phosphoadenosine phosphosulfate reductase
AVR78_RS00295	138.225	37.6434	1.8766	3.6597e-52	1.323e-52	AVR78_RS00295	ShlB/FhaC/HecB family hemolysin secretion/activation protein
AVR78_RS00390	44.2321	15.7192	1.4926	3.5109e-16	3.6461e-17	AVR78_RS00390	hypothetical protein
AVR78_RS00420	33.1741	4.96397	2.7405	9.5087e-16	9.7013e-17	AVR78_RS00420	hypothetical protein
AVR78_RS00455	105.051	25.6472	2.0342	1.8495e-41	4.642e-42	AVR78_RS00455	MFS transporter
AVR78_RS00460	121.638	10.3416	3.5561	6.1083e-57	2.5384e-57	tcuB	tricarballylate utilization protein TcuB
AVR78_RS00530	182.457	62.4633	1.5465	1.3027e-62	6.2847e-63	AVR78_RS00530	potassium-transporting ATPase subunit B
AVR78_RS00535	110.58	54.19	1.029	2.6403e-32	4.8447e-33	AVR78_RS00535	potassium-transporting ATPase subunit KdpA
AVR78_RS00555	171.399	73.2185	1.2271	4.4951e-53	1.6844e-53	AVR78_RS00555	MFS transporter
AVR78_RS00605	49.7611	18.2012	1.451	8.5532e-18	9.5559e-19	AVR78_RS00605	hypothetical protein
AVR78_RS00875	60.8191	27.7155	1.1338	2.9749e-19	3.5073e-20	AVR78_RS00875	LuxR family transcriptional regulator
AVR78_RS00895	110.58	55.0173	1.0071	5.1587e-32	9.3818e-33	AVR78_RS00895	hypothetical protein
AVR78_RS00960	199.044	75.2868	1.4026	3.58e-65	1.9103e-65	AVR78_RS00960	adenosylmethionine--8-amino-7-oxononanoate transaminase
AVR78_RS00970	93.9932	28.5428	1.7194	1.0891e-34	2.183e-35	AVR78_RS00970	8-amino-7-oxononanoate synthase
AVR78_RS00995	27.645	12.4099	1.1555	1.2512e-09	1.007e-10	AVR78_RS00995	hypothetical protein
AVR78_RS01015	171.399	79.4235	1.1097	9.2364e-51	3.1674e-51	AVR78_RS01015	phosphoethanolamine transferase EptA
AVR78_RS01025	11.058	4.5503	1.2811	8.3577e-05	5.4719e-06	AVR78_RS01025	hypothetical protein
AVR78_RS01060	187.986	68.6682	1.4529	1.1936e-62	5.7792e-63	AVR78_RS01060	lysylphosphatidylglycerol synthetase family protein
AVR78_RS01125	121.638	34.3341	1.8249	1.4647e-45	4.22e-46	AVR78_RS01125	transketolase
AVR78_RS01130	88.4641	38.4707	1.2013	5.7895e-28	9.2546e-29	AVR78_RS01130	transketolase
AVR78_RS01260	281.979	91.4197	1.625	6.1407e-98	6.4248e-98	AVR78_RS01260	glycoside hydrolase family 31 protein
AVR78_RS01265	60.8191	26.4745	1.1999	1.0175e-19	1.2179e-20	AVR78_RS01265	MFS transporter
AVR78_RS01275	127.167	46.3304	1.4567	5.228e-43	1.3906e-43	AVR78_RS01275	DUF1479 domain-containing protein
AVR78_RS01310	370.444	184.08	1.0089	3.8316e-103	4.2594e-103	AVR78_RS01310	glutathione ABC transporter ATP-binding protein GsiA
AVR78_RS01320	232.218	79.8371	1.5404	4.8621e-79	3.5442e-79	AVR78_RS01320	glutathione ABC transporter permease GsiC
AVR78_RS01340	215.631	52.5353	2.0372	2.9795e-83	2.4016e-83	AVR78_RS01340	MFS transporter
AVR78_RS01375	11.058	4.13664	1.4186	5.6058e-05	3.7075e-06	AVR78_RS01375	hypothetical protein
AVR78_RS01415	27.645	5.37763	2.362	9.5338e-13	8.6752e-14	AVR78_RS01415	regulator for prophage
AVR78_RS01420	33.1741	7.44595	2.1555	1.6696e-14	1.6311e-15	AVR78_RS01420	hypothetical protein
AVR78_RS01430	11.058	1.24099	3.1555	2.1911e-06	1.5396e-07	AVR78_RS01430	hypothetical protein
AVR78_RS01450	38.7031	8.68694	2.1555	1.1452e-16	1.2129e-17	AVR78_RS01450	hypothetical protein
AVR78_RS01480	293.037	137.336	1.0934	6.3221e-85	5.3041e-85	AVR78_RS01480	SIR2 family protein
AVR78_RS01490	5.52901	0	3.467	0.00071744	4.4827e-05	AVR78_RS01490	baseplate assembly protein W
AVR78_RS01495	99.5222	12.8236	2.9562	5.0773e-45	1.4411e-45	AVR78_RS01495	late control
AVR78_RS01525	82.9351	29.7838	1.4775	8.0721e-29	1.3261e-29	AVR78_RS01525	hypothetical protein
AVR78_RS01560	66.3481	24.8198	1.4186	5.6887e-23	7.6924e-24	AVR78_RS01560	putrescine ABC transporter permease PotI
AVR78_RS01620	33.1741	11.5826	1.5181	1.3416e-12	1.2154e-13	AVR78_RS01620	hypothetical protein
AVR78_RS01655	232.218	100.52	1.208	9.2729e-71	5.5972e-71	AVR78_RS01655	DoxX family protein
AVR78_RS01665	121.638	42.6074	1.5134	6.3029e-42	1.6123e-42	AVR78_RS01665	hydroxylamine reductase
AVR78_RS01770	16.587	2.06832	3.0035	8.3636e-09	6.5302e-10	AVR78_RS01770	dimethylsulfoxide reductase%2C chain B
AVR78_RS01775	187.986	72.8049	1.3685	5.7384e-61	2.6626e-61	AVR78_RS01775	dimethyl sulfoxide reductase anchor subunit
AVR78_RS01780	5.52901	1.24099	2.1555	0.0017315	0.00010632	AVR78_RS01780	hypothetical protein
AVR78_RS01810	243.276	75.2868	1.6921	2.5131e-86	2.1911e-86	AVR78_RS01810	DUF421 domain-containing protein
AVR78_RS01840	381.502	83.9738	2.1837	4.0297e-150	7.5711e-150	AVR78_RS01840	ComEC family protein
AVR78_RS01905	49.7611	21.5105	1.21	1.79e-16	1.8772e-17	AVR78_RS01905	hypothetical protein
AVR78_RS01955	38.7031	13.2372	1.5478	1.4385e-14	1.41e-15	ssuC	alkanesulfonate transporter permease subunit
AVR78_RS01960	71.8771	28.9565	1.3116	6.4328e-24	8.9387e-25	AVR78_RS01960	alkanesulfonate monooxygenase%2C FMNH(2)-dependent
AVR78_RS01965	49.7611	13.6509	1.866	8.4769e-20	1.0201e-20	AVR78_RS01965	aliphatic sulfonate ABC transporter substrate-binding protein
AVR78_RS02055	187.986	70.7365	1.4101	8.3885e-62	3.9681e-62	AVR78_RS02055	regulator of competence-specific genes
AVR78_RS02100	82.9351	36.4024	1.1879	3.425e-26	5.186e-27	AVR78_RS02100	AraC family transcriptional regulator
AVR78_RS02145	143.754	64.1179	1.1648	8.8847e-44	2.4237e-44	AVR78_RS02145	iron ABC transporter substrate-binding protein
AVR78_RS02155	138.225	37.2298	1.8925	2.3539e-52	8.5678e-53	AVR78_RS02155	ABC transporter ATP-binding protein
AVR78_RS02185	237.747	100.52	1.2419	2.6048e-73	1.6746e-73	AVR78_RS02185	formate C-acetyltransferase
AVR78_RS02200	414.676	160.088	1.3731	2.0346e-132	3.2505e-132	AVR78_RS02200	phosphoenolpyruvate--protein phosphotransferase
AVR78_RS02205	121.638	43.8484	1.472	2.0827e-41	5.2174e-42	AVR78_RS02205	oxidoreductase
AVR78_RS02210	165.87	55.431	1.5813	1.1584e-57	4.9055e-58	gabD	NAD-dependent succinate-semialdehyde dehydrogenase
AVR78_RS02225	88.4641	36.8161	1.2648	1.3425e-28	2.1814e-29	AVR78_RS02225	LysR family transcriptional regulator
AVR78_RS02230	176.928	69.9092	1.3396	6.1927e-57	2.5695e-57	AVR78_RS02230	tartrate dehydrogenase
AVR78_RS02240	138.225	46.744	1.5642	4.0932e-48	1.3e-48	AVR78_RS02240	FAD-binding oxidoreductase
AVR78_RS02245	143.754	57.913	1.3116	3.7344e-46	1.0961e-46	AVR78_RS02245	aldehyde dehydrogenase PuuC
AVR78_RS02270	160.341	72.3912	1.1473	2.6628e-48	8.5081e-49	AVR78_RS02270	APC family permease
AVR78_RS02300	193.515	90.1787	1.1016	6.7826e-57	2.8012e-57	AVR78_RS02300	integrase
AVR78_RS02315	44.2321	11.9963	1.8825	7.7618e-18	8.7009e-19	AVR78_RS02315	hypothetical protein
AVR78_RS02320	11.058	1.24099	3.1555	2.1911e-06	1.5396e-07	AVR78_RS02320	hypothetical protein
AVR78_RS02325	5.52901	2.06832	1.4186	0.0043884	0.00026376	AVR78_RS02325	hypothetical protein
AVR78_RS02335	38.7031	18.6149	1.056	1.9099e-12	1.7214e-13	AVR78_RS02335	3'-5' exoribonuclease
AVR78_RS02340	71.8771	19.4422	1.8863	5.2176e-28	8.3506e-29	AVR78_RS02340	DNA adenine methylase Dam
AVR78_RS02350	320.683	95.97	1.7405	1.2286e-114	1.6226e-114	AVR78_RS02350	replication endonuclease
AVR78_RS02365	154.812	66.5999	1.2169	6.2292e-48	1.9668e-48	AVR78_RS02365	oxidoreductase
AVR78_RS02370	105.051	45.0894	1.2202	4.0422e-33	7.7252e-34	AVR78_RS02370	phage capsid scaffolding protein
AVR78_RS02395	5.52901	0	2.7405	0.0010401	6.4457e-05	AVR78_RS02395	hypothetical protein
AVR78_RS02405	49.7611	13.2372	1.9104	5.4327e-20	6.6094e-21	AVR78_RS02405	DUF2570 domain-containing protein
AVR78_RS02410	55.2901	22.3379	1.3075	9.6884e-19	1.1233e-19	AVR78_RS02410	phage tail completion protein R
AVR78_RS02415	44.2321	7.44595	2.5706	4.5864e-20	5.6001e-21	AVR78_RS02415	phage virion morphogenesis protein
AVR78_RS02420	71.8771	14.4782	2.3116	2.1149e-30	3.6902e-31	AVR78_RS02420	phage baseplate assembly protein V
AVR78_RS02425	16.587	4.13664	2.0035	9.2143e-08	6.9445e-09	AVR78_RS02425	phage baseplate assembly protein W
AVR78_RS02435	33.1741	10.7553	1.625	5.8685e-13	5.3841e-14	AVR78_RS02435	phage tail protein I
AVR78_RS02450	281.979	122.858	1.1986	3.2039e-85	2.7397e-85	AVR78_RS02450	phage tail fiber protein
AVR78_RS02460	60.8191	19.4422	1.6453	1.3469e-22	1.7905e-23	AVR78_RS02460	bacteriophage tail fiber protein U
AVR78_RS02465	287.508	120.79	1.2511	1.4753e-88	1.3253e-88	AVR78_RS02465	phage tail tape measure protein
AVR78_RS02480	105.051	30.1975	1.7986	2.4525e-39	5.7345e-40	AVR78_RS02480	phage major tail tube protein
AVR78_RS02490	143.754	54.19	1.4075	1.2099e-47	3.7754e-48	AVR78_RS02490	late control D family protein
AVR78_RS02520	44.2321	9.51427	2.2169	4.965e-19	5.8098e-20	AVR78_RS02520	hypothetical protein
AVR78_RS02545	165.87	55.0173	1.5921	7.6936e-58	3.2842e-58	AVR78_RS02545	pyrimidine utilization transport protein G
AVR78_RS02550	22.116	10.7553	1.0401	1.1311e-07	8.4842e-09	AVR78_RS02550	FMN reductase
AVR78_RS02560	33.1741	13.2372	1.3255	6.5046e-12	5.7407e-13	AVR78_RS02560	pyrimidine utilization protein D
AVR78_RS02565	5.52901	1.24099	2.1555	0.0017315	0.00010632	AVR78_RS02565	aminoacrylate peracid reductase
AVR78_RS02625	204.573	100.934	1.0192	4.8088e-58	2.0693e-58	AVR78_RS02625	deferrochelatase/peroxidase EfeB
AVR78_RS02635	171.399	74.4595	1.2028	1.3298e-52	4.88e-53	AVR78_RS02635	thiol:disulfide interchange protein DsbA
AVR78_RS02645	88.4641	23.1652	1.9331	1.9221e-34	3.8299e-35	AVR78_RS02645	nicotinamidase YcaC
AVR78_RS02660	82.9351	20.2695	2.0327	4.4143e-33	8.4182e-34	AVR78_RS02660	tRNA-Ser
AVR78_RS02715	49.7611	9.51427	2.3869	8.3833e-22	1.0831e-22	AVR78_RS02715	YceK/YidQ family lipoprotein
AVR78_RS02725	55.2901	23.9925	1.2044	4.2583e-18	4.8221e-19	AVR78_RS02725	multidrug transporter MdtG
AVR78_RS02730	132.696	37.2298	1.8336	1.2061e-49	3.9923e-50	AVR78_RS02730	hypothetical protein
AVR78_RS02815	221.16	104.657	1.0794	3.4625e-64	1.7868e-64	AVR78_RS02815	LysR family transcriptional regulator
AVR78_RS03020	82.9351	27.7155	1.5813	1.0718e-29	1.8249e-30	AVR78_RS03020	hypothetical protein
AVR78_RS03030	138.225	61.6359	1.1652	3.6251e-42	9.3717e-43	AVR78_RS03030	triose-phosphate isomerase
AVR78_RS03035	138.225	58.3266	1.2448	2.0271e-43	5.4519e-44	AVR78_RS03035	4-hydroxythreonine-4-phosphate dehydrogenase PdxA
AVR78_RS03040	204.573	99.2793	1.0431	1.2558e-58	5.5194e-59	AVR78_RS03040	type III effector Hop protein
AVR78_RS03055	49.7611	17.7875	1.4842	5.7431e-18	6.4705e-19	AVR78_RS03055	ribose 5-phosphate isomerase B
AVR78_RS03060	77.4061	18.6149	2.056	3.9149e-31	6.9493e-32	AVR78_RS03060	transaldolase
AVR78_RS03065	22.116	2.89565	2.9331	3.3706e-11	2.885e-12	AVR78_RS03065	transketolase
AVR78_RS03070	232.218	108.794	1.0939	1.063e-67	6.0472e-68	AVR78_RS03070	crotonobetaine/carnitine-CoA ligase
AVR78_RS03120	116.109	53.7763	1.1104	5.8797e-35	1.1839e-35	AVR78_RS03120	AraC family transcriptional regulator
AVR78_RS03125	93.9932	42.6074	1.1415	5.8533e-29	9.6815e-30	AVR78_RS03125	cupin domain-containing protein
AVR78_RS03185	38.7031	3.72298	3.3779	4.3563e-19	5.1133e-20	AVR78_RS03185	class I SAM-dependent methyltransferase
AVR78_RS03195	82.9351	30.6111	1.4379	1.7787e-28	2.8848e-29	AVR78_RS03195	hypothetical protein
AVR78_RS03215	11.058	0	4.7405	1.4837e-06	1.0534e-07	AVR78_RS03215	hypothetical protein
AVR78_RS03225	44.2321	14.4782	1.6112	1.0288e-16	1.0922e-17	AVR78_RS03225	hypothetical protein
AVR78_RS03245	176.928	74.8732	1.2406	5.3486e-55	2.0924e-55	AVR78_RS03245	DUF1133 domain-containing protein
AVR78_RS03270	5.52901	1.24099	2.1555	0.0017315	0.00010632	AVR78_RS03270	hypothetical protein
AVR78_RS03280	38.7031	3.72298	3.3779	4.3563e-19	5.1133e-20	AVR78_RS03280	hypothetical protein
AVR78_RS03290	38.7031	14.0646	1.4604	3.2286e-14	3.1187e-15	AVR78_RS03290	hypothetical protein
AVR78_RS03310	265.392	79.0098	1.748	2.1713e-95	2.1942e-95	AVR78_RS03310	terminase large subunit
AVR78_RS03315	127.167	48.3987	1.3937	3.6713e-42	9.482e-43	AVR78_RS03315	phage portal protein
AVR78_RS03320	33.1741	5.7913	2.5181	2.4838e-15	2.496e-16	AVR78_RS03320	HK97 family phage prohead protease
AVR78_RS03325	105.051	50.8807	1.0459	5.4986e-31	9.7345e-32	AVR78_RS03325	phage major capsid protein
AVR78_RS03330	33.1741	4.96397	2.7405	9.5087e-16	9.7013e-17	AVR78_RS03330	phage gp6-like head-tail connector protein
AVR78_RS03375	398.089	159.674	1.318	8.0298e-125	1.2103e-124	AVR78_RS03375	phage tail tape measure protein
AVR78_RS03395	22.116	0	4.7405	9.9515e-12	8.7307e-13	AVR78_RS03395	kinase
AVR78_RS03400	11.058	2.48198	2.1555	9.4035e-06	6.4577e-07	AVR78_RS03400	hypothetical protein
AVR78_RS03405	49.7611	14.4782	1.7811	2.0381e-19	2.4145e-20	AVR78_RS03405	hypothetical protein
AVR78_RS03425	187.986	81.0781	1.2132	9.6608e-58	4.0977e-58	AVR78_RS03425	translesion error-prone DNA polymerase V subunit UmuC
AVR78_RS03435	154.812	72.8049	1.0884	1.2414e-45	3.5805e-46	AVR78_RS03435	chaperonin
AVR78_RS03475	82.9351	36.8161	1.1716	4.9009e-26	7.3913e-27	AVR78_RS03475	DUF1272 domain-containing protein
AVR78_RS03480	110.58	41.3664	1.4186	3.5153e-37	7.5573e-38	AVR78_RS03480	glutathione-dependent formaldehyde dehydrogenase
AVR78_RS03500	99.5222	44.6757	1.1555	9.9861e-31	1.7555e-31	AVR78_RS03500	Mn-containing catalase
AVR78_RS03505	182.457	79.4235	1.1999	8.0599e-56	3.2532e-56	AVR78_RS03505	cytochrome ubiquinol oxidase subunit I
AVR78_RS03510	93.9932	43.4347	1.1137	1.1804e-28	1.9226e-29	AVR78_RS03510	cytochrome d ubiquinol oxidase subunit II
AVR78_RS03540	82.9351	39.7117	1.0624	5.6596e-25	8.1443e-26	AVR78_RS03540	lipoprotein
AVR78_RS03565	160.341	74.8732	1.0986	2.1605e-47	6.6408e-48	AVR78_RS03565	type II asparaginase
AVR78_RS03640	60.8191	27.7155	1.1338	2.9749e-19	3.5073e-20	AVR78_RS03640	DUF441 domain-containing protein
AVR78_RS03665	138.225	52.5353	1.3957	1.0513e-45	3.0486e-46	AVR78_RS03665	translesion error-prone DNA polymerase V subunit UmuC
AVR78_RS03675	143.754	65.3589	1.1371	2.5621e-43	6.8629e-44	AVR78_RS03675	NAD dependent epimerase/dehydratase
AVR78_RS03680	44.2321	14.0646	1.653	6.7683e-17	7.2754e-18	AVR78_RS03680	ester cyclase
AVR78_RS03685	49.7611	23.1652	1.1031	7.4655e-16	7.6517e-17	AVR78_RS03685	alkene reductase
AVR78_RS03690	160.341	78.5961	1.0286	4.6321e-46	1.3521e-46	AVR78_RS03690	LysR family transcriptional regulator
AVR78_RS03700	132.696	60.8086	1.1258	6.0612e-40	1.44e-40	AVR78_RS03700	aspartate aminotransferase family protein
AVR78_RS03705	88.4641	25.6472	1.7863	2.6901e-33	5.1782e-34	AVR78_RS03705	hypothetical protein
AVR78_RS03710	154.812	51.708	1.5821	5.9706e-54	2.2789e-54	AVR78_RS03710	glutamine ABC transporter substrate-binding protein GlnH
AVR78_RS03715	132.696	39.2981	1.7556	1.0485e-48	3.3906e-49	AVR78_RS03715	glutamine ABC transporter permease GlnP
AVR78_RS03720	77.4061	38.0571	1.0243	4.6078e-23	6.253e-24	glnQ	glutamine ABC transporter ATP-binding protein
AVR78_RS03730	127.167	43.4347	1.5498	3.189e-44	8.7804e-45	AVR78_RS03730	MFS transporter
AVR78_RS03735	232.218	68.6682	1.7578	6.5194e-84	5.3518e-84	AVR78_RS03735	LysR family transcriptional regulator
AVR78_RS03870	160.341	64.9452	1.3039	3.8794e-51	1.3459e-51	AVR78_RS03870	(deoxy)nucleoside triphosphate pyrophosphohydrolase
AVR78_RS03890	88.4641	33.5068	1.4006	6.4956e-30	1.113e-30	AVR78_RS03890	ABC transporter permease
AVR78_RS03895	60.8191	23.5788	1.367	7.4619e-21	9.3202e-22	AVR78_RS03895	ABC transporter substrate-binding protein
AVR78_RS03910	38.7031	16.5466	1.2259	3.2188e-13	2.9911e-14	AVR78_RS03910	TVP38/TMEM64 family protein
AVR78_RS03980	110.58	46.3304	1.2551	3.2985e-35	6.6973e-36	AVR78_RS03980	PTS N%2CN'-diacetylchitobiose transporter subunit IIC
AVR78_RS03985	22.116	5.37763	2.0401	5.9304e-10	4.8356e-11	AVR78_RS03985	PTS N%2CN'-diacetylchitobiose transporter subunit IIA
AVR78_RS03995	176.928	74.0458	1.2567	2.572e-55	1.0166e-55	AVR78_RS03995	6-phospho-beta-glucosidase
AVR78_RS04070	154.812	36.8161	2.0721	1.0046e-60	4.6449e-61	AVR78_RS04070	Fe2+-dependent dioxygenase
AVR78_RS04085	33.1741	6.20496	2.4186	4.0169e-15	4.0078e-16	AVR78_RS04085	hypothetical protein
AVR78_RS04090	55.2901	15.3056	1.853	9.3049e-22	1.1999e-22	AVR78_RS04090	hypothetical protein
AVR78_RS04100	127.167	31.4385	2.0161	1.2467e-49	4.1216e-50	AVR78_RS04100	MFS transporter
AVR78_RS04105	88.4641	29.7838	1.5706	1.806e-31	3.2337e-32	AVR78_RS04105	tartrate dehydrogenase
AVR78_RS04110	160.341	59.5676	1.4285	2.7153e-53	1.0189e-53	AVR78_RS04110	glycerate kinase
AVR78_RS04130	66.3481	28.1291	1.238	1.178e-21	1.5139e-22	AVR78_RS04130	bifunctional anthranilate synthase glutamate amidotransferase component TrpG/anthranilate phosphoribosyltransferase TrpD
AVR78_RS04150	232.218	81.9055	1.5035	3.6103e-78	2.5893e-78	AVR78_RS04150	drug/metabolite transporter permease
AVR78_RS04190	11.058	4.96397	1.1555	0.00012242	7.9606e-06	AVR78_RS04190	hypothetical protein
AVR78_RS04270	16.587	8.27328	1.0035	5.1829e-06	3.5907e-07	AVR78_RS04270	hypothetical protein
AVR78_RS04280	60.8191	28.5428	1.0914	5.9918e-19	6.9807e-20	AVR78_RS04280	CMD domain-containing protein
AVR78_RS04295	105.051	38.4707	1.4493	9.5396e-36	1.9654e-36	AVR78_RS04295	hypothetical protein
AVR78_RS04300	160.341	55.8446	1.5217	7.7157e-55	3.0095e-55	AVR78_RS04300	ABC transporter substrate-binding protein
AVR78_RS04305	55.2901	25.6472	1.1082	1.7724e-17	1.9524e-18	AVR78_RS04305	polar amino acid ABC transporter permease
AVR78_RS04310	33.1741	16.1329	1.0401	8.2251e-11	6.9334e-12	AVR78_RS04310	polar amino acid ABC transporter permease
AVR78_RS04355	121.638	38.0571	1.6764	6.8941e-44	1.8903e-44	AVR78_RS04355	nucleoside-diphosphate sugar epimerase
AVR78_RS04375	82.9351	39.7117	1.0624	5.6596e-25	8.1443e-26	AVR78_RS04375	MFS transporter
AVR78_RS04380	165.87	72.3912	1.1962	7.7435e-51	2.6726e-51	AVR78_RS04380	phage shock protein operon transcriptional activator
AVR78_RS04460	116.109	57.913	1.0035	1.7653e-33	3.4177e-34	AVR78_RS04460	alpha/beta hydrolase
AVR78_RS04465	88.4641	31.0248	1.5117	6.0887e-31	1.0758e-31	AVR78_RS04465	MFS transporter
AVR78_RS04480	154.812	74.8732	1.048	6.8402e-45	1.9332e-45	AVR78_RS04480	hybrid sensor histidine kinase/response regulator
AVR78_RS04495	160.341	62.0496	1.3697	2.753e-52	9.9931e-53	AVR78_RS04495	DUF3131 domain-containing protein
AVR78_RS04505	210.102	69.4955	1.5961	7.3765e-73	4.7082e-73	AVR78_RS04505	cellulose synthase (UDP-forming)
AVR78_RS04520	165.87	69.9092	1.2465	8.8007e-52	3.139e-52	AVR78_RS04520	chemotaxis regulator
AVR78_RS04525	16.587	3.30931	2.3255	3.5619e-08	2.7245e-09	AVR78_RS04525	anti-sigma factor antagonist
AVR78_RS04540	22.116	7.03229	1.653	3.5261e-09	2.7915e-10	AVR78_RS04540	LysR family transcriptional regulator
AVR78_RS04560	204.573	47.985	2.092	5.7365e-80	4.2395e-80	AVR78_RS04560	NAD(P)-dependent oxidoreductase
AVR78_RS04570	132.696	41.3664	1.6816	8.757e-48	2.7551e-48	AVR78_RS04570	dehydrogenase/reductase oxidoreductase
AVR78_RS04585	66.3481	28.9565	1.1962	2.4405e-21	3.1035e-22	AVR78_RS04585	aromatic alcohol reductase
AVR78_RS04605	204.573	86.0421	1.2495	1.6394e-63	8.2368e-64	AVR78_RS04605	NmrA/HSCARG family protein
AVR78_RS04615	110.58	40.9527	1.4331	2.3795e-37	5.1655e-38	AVR78_RS04615	class I and II aminotransferase
AVR78_RS04620	71.8771	28.9565	1.3116	6.4328e-24	8.9387e-25	AVR78_RS04620	NLPA lipoprotein
AVR78_RS04625	138.225	66.5999	1.0534	2.3371e-40	5.648e-41	AVR78_RS04625	methionine ABC transporter ATP-binding protein
AVR78_RS04635	105.051	28.9565	1.8591	6.6209e-40	1.5674e-40	AVR78_RS04635	aspartate/tyrosine/aromatic aminotransferase
AVR78_RS04650	254.334	95.97	1.4061	7.467e-83	5.9645e-83	AVR78_RS04650	aromatic amino acid transporter AroP
AVR78_RS04670	82.9351	21.0969	1.975	1.0922e-32	2.0463e-33	AVR78_RS04670	DeoR/GlpR transcriptional regulator
AVR78_RS04695	44.2321	7.85961	2.4926	7.4076e-20	8.9346e-21	AVR78_RS04695	integrase
AVR78_RS04755	55.2901	23.5788	1.2295	2.9563e-18	3.362e-19	AVR78_RS04755	DedA family protein
AVR78_RS04760	44.2321	13.2372	1.7405	2.8875e-17	3.1533e-18	AVR78_RS04760	hypothetical protein
AVR78_RS04795	38.7031	5.37763	2.8474	2.5381e-18	2.8901e-19	AVR78_RS04795	hypothetical protein
AVR78_RS04800	60.8191	21.0969	1.5275	6.9919e-22	9.0598e-23	AVR78_RS04800	ABC transporter substrate-binding protein
AVR78_RS04805	55.2901	21.5105	1.362	4.5245e-19	5.3083e-20	AVR78_RS04805	phytanoyl-CoA dioxygenase
AVR78_RS04810	88.4641	39.7117	1.1555	1.6942e-27	2.6809e-28	AVR78_RS04810	amino acid ABC transporter permease/ATP-binding protein
AVR78_RS04815	127.167	55.8446	1.1872	2.9632e-39	6.8986e-40	AVR78_RS04815	LysR family transcriptional regulator
AVR78_RS04820	121.638	31.0248	1.9711	4.246e-47	1.2917e-47	AVR78_RS04820	hypothetical protein
AVR78_RS04830	38.7031	12.4099	1.641	6.2717e-15	6.2111e-16	AVR78_RS04830	DUF1028 domain-containing protein
AVR78_RS04835	105.051	20.6832	2.3446	7.0191e-44	1.9226e-44	AVR78_RS04835	acetylornithine deacetylase
AVR78_RS04840	27.645	12.4099	1.1555	1.2512e-09	1.007e-10	AVR78_RS04840	phytanoyl-CoA dioxygenase
AVR78_RS04855	16.587	5.37763	1.625	3.5129e-07	2.5804e-08	AVR78_RS04855	hypothetical protein
AVR78_RS04860	16.587	4.13664	2.0035	9.2143e-08	6.9445e-09	AVR78_RS04860	DNA helicase
AVR78_RS04870	176.928	55.8446	1.6637	8.2601e-63	4.0362e-63	AVR78_RS04870	phenylacetic acid degradation bifunctional protein PaaZ
AVR78_RS04875	121.638	40.1254	1.6	5.5106e-43	1.46e-43	AVR78_RS04875	1%2C2-phenylacetyl-CoA epoxidase subunit A
AVR78_RS04880	11.058	4.13664	1.4186	5.6058e-05	3.7075e-06	AVR78_RS04880	1%2C2-phenylacetyl-CoA epoxidase subunit B
AVR78_RS04890	33.1741	10.7553	1.625	5.8685e-13	5.3841e-14	AVR78_RS04890	phenylacetate-CoA oxygenase subunit PaaJ
AVR78_RS04910	154.812	77.3552	1.001	5.1089e-44	1.4023e-44	AVR78_RS04910	3-hydroxyacyl-CoA dehydrogenase
AVR78_RS04915	38.7031	6.20496	2.641	6.5712e-18	7.388e-19	AVR78_RS04915	phenylacetic acid degradation protein PaaD
AVR78_RS04955	127.167	59.5676	1.0941	7.0251e-38	1.5477e-38	AVR78_RS04955	hypothetical protein
AVR78_RS04995	110.58	30.6111	1.853	7.4515e-42	1.897e-42	AVR78_RS04995	MFS transporter
AVR78_RS05000	71.8771	33.9204	1.0834	4.8797e-22	6.3692e-23	AVR78_RS05000	aldo/keto reductase
AVR78_RS05010	116.109	40.9527	1.5035	5.5584e-40	1.3217e-40	AVR78_RS05010	acetyl-CoA C-acyltransferase
AVR78_RS05015	127.167	40.9527	1.6347	2.7199e-45	7.786e-46	AVR78_RS05015	A-factor biosynthesis repeat-containing protein
AVR78_RS05020	88.4641	32.2658	1.4551	2.0096e-30	3.5135e-31	AVR78_RS05020	HAD-IB family hydrolase
AVR78_RS05065	82.9351	39.7117	1.0624	5.6596e-25	8.1443e-26	AVR78_RS05065	MFS transporter
AVR78_RS05200	88.4641	29.7838	1.5706	1.806e-31	3.2337e-32	AVR78_RS05200	hypothetical protein
AVR78_RS05260	132.696	48.3987	1.4551	8.8483e-45	2.4876e-45	AVR78_RS05260	p-aminobenzoyl-glutamate transporter
AVR78_RS05265	88.4641	37.2298	1.2486	1.9409e-28	3.1422e-29	AVR78_RS05265	amidohydrolase
AVR78_RS05270	55.2901	23.5788	1.2295	2.9563e-18	3.362e-19	AVR78_RS05270	amidohydrolase
AVR78_RS05290	60.8191	25.2335	1.2692	3.385e-20	4.1503e-21	AVR78_RS05290	3-oxoacid CoA-transferase subunit alpha
AVR78_RS05375	44.2321	14.4782	1.6112	1.0288e-16	1.0922e-17	AVR78_RS05375	hypothetical protein
AVR78_RS05405	93.9932	29.7838	1.658	3.8631e-34	7.6288e-35	AVR78_RS05405	AEC family transporter
AVR78_RS05410	44.2321	20.6832	1.0966	3.1631e-14	3.0576e-15	AVR78_RS05410	biotin-independent malonate decarboxylase subunit gamma
AVR78_RS05415	38.7031	9.92793	1.9629	4.558e-16	4.7134e-17	AVR78_RS05415	biotin-independent malonate decarboxylase subunit beta
AVR78_RS05425	38.7031	14.0646	1.4604	3.2286e-14	3.1187e-15	AVR78_RS05425	triphosphoribosyl-dephospho-CoA synthase
AVR78_RS05470	66.3481	22.3379	1.5706	5.1547e-24	7.1964e-25	AVR78_RS05470	acid-shock protein
AVR78_RS05480	121.638	57.913	1.0706	5.7097e-36	1.1827e-36	AVR78_RS05480	MFS transporter
AVR78_RS05550	237.747	92.6607	1.3594	2.1962e-76	1.5024e-76	AVR78_RS05550	MFS transporter
AVR78_RS05580	132.696	44.6757	1.5706	2.4046e-46	7.1361e-47	AVR78_RS05580	hypothetical protein
AVR78_RS05605	66.3481	26.0608	1.3482	1.8126e-22	2.3987e-23	AVR78_RS05605	hypothetical protein
AVR78_RS05625	93.9932	33.9204	1.4704	2.2714e-32	4.1967e-33	AVR78_RS05625	helix-turn-helix transcriptional regulator
AVR78_RS05640	187.986	47.1577	1.9951	3.5642e-72	2.2533e-72	AVR78_RS05640	GntP family transporter
AVR78_RS05650	27.645	2.06832	3.7405	2.7721e-14	2.6923e-15	AVR78_RS05650	aldolase
AVR78_RS05655	93.9932	33.0931	1.506	1.0237e-32	1.922e-33	AVR78_RS05655	four-carbon acid sugar kinase family protein
AVR78_RS05660	66.3481	25.2335	1.3947	8.3964e-23	1.1274e-23	AVR78_RS05660	NAD(P)-dependent oxidoreductase
AVR78_RS05685	176.928	66.5999	1.4096	2.8983e-58	1.2614e-58	lacY	MFS transporter
AVR78_RS05725	44.2321	16.5466	1.4186	7.773e-16	7.9578e-17	AVR78_RS05725	hypothetical protein
AVR78_RS05735	93.9932	42.1937	1.1555	4.1098e-29	6.8359e-30	AVR78_RS05735	urea ABC transporter substrate-binding protein
AVR78_RS05740	93.9932	21.0969	2.1555	3.6032e-38	7.9909e-39	AVR78_RS05740	urea ABC transporter permease subunit UrtB
AVR78_RS05745	77.4061	30.6111	1.3384	7.349e-26	1.0984e-26	AVR78_RS05745	urea ABC transporter permease subunit UrtC
AVR78_RS05750	82.9351	20.2695	2.0327	4.4143e-33	8.4182e-34	AVR78_RS05750	urea ABC transporter ATP-binding protein UrtD
AVR78_RS05815	49.7611	17.7875	1.4842	5.7431e-18	6.4705e-19	AVR78_RS05815	N-acetyltransferase
AVR78_RS05835	71.8771	17.7875	2.0147	8.6652e-29	1.4192e-29	AVR78_RS05835	DUF4186 domain-containing protein
AVR78_RS05850	127.167	43.4347	1.5498	3.189e-44	8.7804e-45	AVR78_RS05850	tagaturonate reductase
AVR78_RS05860	49.7611	15.3056	1.701	4.8174e-19	5.6396e-20	AVR78_RS05860	tautomerase family protein
AVR78_RS05865	11.058	4.96397	1.1555	0.00012242	7.9606e-06	AVR78_RS05865	carboxymuconolactone decarboxylase family protein
AVR78_RS05910	44.2321	19.8559	1.1555	1.5598e-14	1.5255e-15	AVR78_RS05910	ABC transporter
AVR78_RS05965	105.051	47.1577	1.1555	2.43e-32	4.4743e-33	AVR78_RS05965	flavoprotein monooxygenase
AVR78_RS06010	27.645	4.96397	2.4775	5.8921e-13	5.4038e-14	AVR78_RS06010	hypothetical protein
AVR78_RS06060	49.7611	19.8559	1.3255	4.0391e-17	4.377e-18	AVR78_RS06060	phosphoenolpyruvate-dependent sugar phosphotransferase system%2C EIIA 2
AVR78_RS06075	221.16	92.6607	1.2551	1.1922e-68	6.8549e-69	AVR78_RS06075	6-phospho-alpha-glucosidase
AVR78_RS06080	132.696	54.6036	1.2811	2.7303e-42	7.0791e-43	AVR78_RS06080	PTS glucose-like transporter subunit IIB
AVR78_RS06090	66.3481	26.8882	1.3031	3.8661e-22	5.0587e-23	AVR78_RS06090	sulfite exporter TauE/SafE family protein
AVR78_RS06105	143.754	70.3229	1.0315	1.5828e-41	3.9837e-42	AVR78_RS06105	alpha/beta hydrolase
AVR78_RS06110	320.683	129.063	1.3131	9.3504e-101	1.01e-100	AVR78_RS06110	AcrB/AcrD/AcrF family protein
AVR78_RS06115	82.9351	23.5788	1.8145	1.5606e-31	2.8049e-32	AVR78_RS06115	efflux RND transporter periplasmic adaptor subunit
AVR78_RS06130	265.392	111.689	1.2486	8.1144e-82	6.2389e-82	AVR78_RS06130	MipA/OmpV family protein
AVR78_RS06135	237.747	83.1465	1.5157	2.7771e-80	2.0696e-80	AVR78_RS06135	hypothetical protein
AVR78_RS06140	199.044	85.2148	1.2239	2.85e-61	1.3363e-61	AVR78_RS06140	sigma-54-dependent Fis family transcriptional regulator
AVR78_RS06150	165.87	62.4633	1.409	1.0032e-54	3.8903e-55	AVR78_RS06150	phosphoglycerate transport regulator PgtC
AVR78_RS06175	127.167	48.8123	1.3814	5.3955e-42	1.3868e-42	AVR78_RS06175	allophanate hydrolase
AVR78_RS06180	375.973	139.405	1.4313	1.4484e-122	2.1468e-122	AVR78_RS06180	urea carboxylase
AVR78_RS06185	71.8771	20.2695	1.8262	1.2587e-27	1.9965e-28	AVR78_RS06185	urea carboxylase-associated protein 1
AVR78_RS06190	66.3481	27.7155	1.2594	8.1495e-22	1.0534e-22	AVR78_RS06190	urea carboxylase-associated protein 2
AVR78_RS06195	55.2901	21.9242	1.3345	6.6327e-19	7.7206e-20	AVR78_RS06195	ABC transporter ATP-binding protein
AVR78_RS06220	160.341	51.708	1.6327	1.3041e-56	5.3363e-57	AVR78_RS06220	DUF4354 domain-containing protein
AVR78_RS06225	116.109	53.3626	1.1216	4.1492e-35	8.4053e-36	AVR78_RS06225	oxalate/formate MFS antiporter
AVR78_RS06255	182.457	64.1179	1.5088	6.5037e-62	3.0985e-62	AVR78_RS06255	MFS transporter
AVR78_RS06295	71.8771	28.5428	1.3324	4.4079e-24	6.1636e-25	AVR78_RS06295	amino acid ABC transporter ATP-binding protein
AVR78_RS06300	16.587	8.27328	1.0035	5.1829e-06	3.5907e-07	AVR78_RS06300	amino acid ABC transporter permease
AVR78_RS06305	60.8191	23.5788	1.367	7.4619e-21	9.3202e-22	AVR78_RS06305	amino acid ABC transporter permease
AVR78_RS06330	60.8191	19.8559	1.615	2.0437e-22	2.6966e-23	AVR78_RS06330	AtzE family amidohydrolase
AVR78_RS06335	22.116	5.7913	1.9331	9.3909e-10	7.5854e-11	AVR78_RS06335	DUF3225 domain-containing protein
AVR78_RS06340	60.8191	24.8198	1.293	2.3307e-20	2.8722e-21	AVR78_RS06340	GNAT family N-acetyltransferase
AVR78_RS06360	93.9932	33.0931	1.506	1.0237e-32	1.922e-33	AVR78_RS06360	MFS transporter
AVR78_RS06365	116.109	48.3987	1.2624	5.5896e-37	1.1969e-37	AVR78_RS06365	beta-ketoacyl-[acyl-carrier-protein] synthase II
AVR78_RS06375	93.9932	35.9888	1.385	1.6031e-31	2.8782e-32	AVR78_RS06375	glutathione transferase GstA
AVR78_RS06405	38.7031	18.6149	1.056	1.9099e-12	1.7214e-13	AVR78_RS06405	EamA-like transporter family protein
AVR78_RS06410	55.2901	20.6832	1.4186	2.0826e-19	2.4639e-20	AVR78_RS06410	EamA-like transporter family protein
AVR78_RS06430	16.587	1.24099	3.7405	3.7801e-09	2.9864e-10	AVR78_RS06430	hypothetical protein
AVR78_RS06470	66.3481	23.9925	1.4675	2.5872e-23	3.5326e-24	AVR78_RS06470	FAA hydrolase family protein
AVR78_RS06475	193.515	86.0421	1.1693	2.0406e-58	8.9103e-59	AVR78_RS06475	MFS transporter
AVR78_RS06485	105.051	33.5068	1.6486	7.3719e-38	1.6214e-38	AVR78_RS06485	histidine phosphatase family protein
AVR78_RS06520	99.5222	34.7478	1.5181	1.1542e-34	2.3101e-35	AVR78_RS06520	cytosine/purine/uracil/thiamine/allantoin permease
AVR78_RS06525	149.283	67.0136	1.1555	3.1052e-45	8.8606e-46	AVR78_RS06525	guanine deaminase
AVR78_RS06545	27.645	8.68694	1.6701	3.6467e-11	3.1153e-12	AVR78_RS06545	AP endonuclease
AVR78_RS06550	99.5222	39.2981	1.3406	8.4823e-33	1.5971e-33	AVR78_RS06550	gfo/Idh/MocA family oxidoreductase
AVR78_RS06555	143.754	70.7365	1.0231	2.2141e-41	5.531e-42	AVR78_RS06555	DUF4056 domain-containing protein
AVR78_RS06560	66.3481	29.7838	1.1555	4.999e-21	6.2911e-22	AVR78_RS06560	lipoprotein
AVR78_RS06575	16.587	4.5503	1.866	1.4577e-07	1.0881e-08	AVR78_RS06575	ABC transporter ATP-binding protein
AVR78_RS06580	44.2321	6.61862	2.7405	1.7633e-20	2.178e-21	AVR78_RS06580	ABC transporter permease
AVR78_RS06585	110.58	33.9204	1.7049	2.345e-40	5.6618e-41	AVR78_RS06585	NMT1/THI5 like domain-containing protein
AVR78_RS06605	226.689	71.1502	1.6718	3.9506e-80	2.9359e-80	AVR78_RS06605	cytochrome c biogenesis protein/redoxin
AVR78_RS06610	82.9351	38.8844	1.0928	2.844e-25	4.169e-26	AVR78_RS06610	two-component sensor histidine kinase
AVR78_RS06620	82.9351	35.5751	1.2211	1.6615e-26	2.5402e-27	AVR78_RS06620	alpha/beta hydrolase
AVR78_RS06640	38.7031	17.7875	1.1216	9.5019e-13	8.658e-14	AVR78_RS06640	pyrroloquinoline quinone biosynthesis protein C
AVR78_RS06650	49.7611	24.4062	1.0278	2.0975e-15	2.1149e-16	AVR78_RS06650	pyrroloquinoline quinone biosynthesis protein PqqE
AVR78_RS06665	71.8771	30.1975	1.2511	1.967e-23	2.6995e-24	AVR78_RS06665	glutamine amidotransferase
AVR78_RS06690	121.638	47.985	1.3419	1.0031e-39	2.3621e-40	AVR78_RS06690	magnesium transporter MgtC
AVR78_RS06780	16.587	5.7913	1.5181	5.3496e-07	3.8964e-08	AVR78_RS06780	hypothetical protein
AVR78_RS06790	132.696	64.5316	1.0401	1.3354e-38	3.0244e-39	AVR78_RS06790	NAD(P)-dependent oxidoreductase
AVR78_RS06830	33.1741	14.8919	1.1555	2.8671e-11	2.4596e-12	AVR78_RS06830	hypothetical protein
AVR78_RS06865	71.8771	18.6149	1.9491	2.1382e-28	3.4553e-29	AVR78_RS06865	ABC transporter permease
AVR78_RS06870	27.645	10.3416	1.4186	1.8884e-10	1.5671e-11	AVR78_RS06870	ABC transporter permease
AVR78_RS06895	44.2321	14.4782	1.6112	1.0288e-16	1.0922e-17	AVR78_RS06895	VOC family protein
AVR78_RS06920	127.167	32.6795	1.9603	4.8178e-49	1.5714e-49	AVR78_RS06920	formate dehydrogenase subunit beta
AVR78_RS06925	176.928	55.8446	1.6637	8.2601e-63	4.0362e-63	AVR78_RS06925	formate dehydrogenase-N subunit alpha
AVR78_RS06945	110.58	37.2298	1.5706	6.5259e-39	1.4907e-39	benD	1%2C6-dihydroxycyclohexa-2%2C4-diene-1-carboxylate dehydrogenase
AVR78_RS06950	49.7611	20.2695	1.2957	5.8947e-17	6.3568e-18	AVR78_RS06950	NADH oxidoreductase for HCP
AVR78_RS06955	38.7031	11.1689	1.793	1.7327e-15	1.7517e-16	AVR78_RS06955	benzoate 1%2C2-dioxygenase small subunit
AVR78_RS06960	121.638	47.985	1.3419	1.0031e-39	2.3621e-40	AVR78_RS06960	3-phenylpropionate dioxygenase subunit alpha
AVR78_RS06965	88.4641	43.4347	1.0262	3.8004e-26	5.7414e-27	AVR78_RS06965	catechol 1%2C2-dioxygenase
AVR78_RS06975	105.051	40.5391	1.3737	6.6544e-35	1.3369e-35	AVR78_RS06975	muconate and chloromuconate cycloisomerase
AVR78_RS07000	215.631	103.416	1.0601	3.8987e-62	1.8629e-62	AVR78_RS07000	nitrate reductase subunit alpha
AVR78_RS07015	38.7031	16.9602	1.1903	4.6396e-13	4.2758e-14	AVR78_RS07015	respiratory nitrate reductase subunit gamma
AVR78_RS07025	232.218	74.0458	1.649	1.5719e-81	1.2016e-81	AVR78_RS07025	iron ABC transporter permease
AVR78_RS07050	99.5222	39.2981	1.3406	8.4823e-33	1.5971e-33	AVR78_RS07050	alpha-L-rhamnosidase
AVR78_RS07060	149.283	71.1502	1.0691	1.0031e-43	2.728e-44	AVR78_RS07060	porin
AVR78_RS07070	60.8191	12.4099	2.293	6.7125e-26	1.0055e-26	AVR78_RS07070	glutathione S-transferase family protein
AVR78_RS07075	33.1741	9.92793	1.7405	2.5023e-13	2.3326e-14	AVR78_RS07075	amino acid ABC transporter substrate-binding protein
AVR78_RS07080	49.7611	17.7875	1.4842	5.7431e-18	6.4705e-19	AVR78_RS07080	amino acid ABC transporter ATP-binding protein
AVR78_RS07085	116.109	19.4422	2.5782	5.1094e-50	1.7104e-50	AVR78_RS07085	amino acid ABC transporter permease
AVR78_RS07095	55.2901	22.3379	1.3075	9.6884e-19	1.1233e-19	AVR78_RS07095	ABC transporter substrate-binding protein
AVR78_RS07100	138.225	52.949	1.3843	1.5452e-45	4.4473e-46	AVR78_RS07100	FMN-dependent monooxygenase
AVR78_RS07105	77.4061	38.0571	1.0243	4.6078e-23	6.253e-24	AVR78_RS07105	amidohydrolase
AVR78_RS07110	93.9932	26.8882	1.8056	1.9503e-35	3.9996e-36	AVR78_RS07110	MsnO8 family LLM class oxidoreductase
AVR78_RS07125	22.116	8.68694	1.3482	1.8009e-08	1.3918e-09	AVR78_RS07125	SAM-dependent methyltransferase
AVR78_RS07135	82.9351	15.7192	2.3995	2.6131e-35	5.3381e-36	AVR78_RS07135	hypothetical protein
AVR78_RS07210	99.5222	45.503	1.1291	2.0215e-30	3.5296e-31	AVR78_RS07210	alpha/beta hydrolase
AVR78_RS07215	27.645	10.7553	1.362	2.7958e-10	2.3058e-11	AVR78_RS07215	DUF2566 domain-containing protein
AVR78_RS07220	27.645	8.27328	1.7405	2.3716e-11	2.0424e-12	AVR78_RS07220	stress response membrane protein YncL
AVR78_RS07295	49.7611	21.0969	1.238	1.2409e-16	1.3118e-17	AVR78_RS07295	hypothetical protein
AVR78_RS07305	66.3481	31.0248	1.0966	1.4355e-20	1.778e-21	AVR78_RS07305	benzoate membrane transporter
AVR78_RS07315	176.928	87.6968	1.0126	2.6578e-50	8.9871e-51	AVR78_RS07315	EamA/RhaT family transporter
AVR78_RS07360	38.7031	19.0285	1.0243	2.6892e-12	2.4093e-13	AVR78_RS07360	protocatechuate 3%2C4-dioxygenase subunit beta
AVR78_RS07365	88.4641	33.9204	1.3829	9.5599e-30	1.6297e-30	AVR78_RS07365	protocatechuate 3%2C4-dioxygenase subunit alpha
AVR78_RS07375	226.689	86.4558	1.3907	1.1139e-73	7.2482e-74	AVR78_RS07375	glucose/quinate/shikimate family membrane-bound PQQ-dependent dehydrogenase
AVR78_RS07525	138.225	52.5353	1.3957	1.0513e-45	3.0486e-46	AVR78_RS07525	GGDEF domain-containing protein
AVR78_RS07595	121.638	50.8807	1.2574	1.3704e-38	3.0985e-39	AVR78_RS07595	AraC family transcriptional regulator
AVR78_RS07615	210.102	83.5601	1.3302	4.7153e-67	2.6046e-67	AVR78_RS07615	LysR family transcriptional regulator
AVR78_RS07665	121.638	49.226	1.3051	3.1059e-39	7.2119e-40	AVR78_RS07665	oxidoreductase
AVR78_RS07680	49.7611	23.5788	1.0775	1.0572e-15	1.0777e-16	AVR78_RS07680	hypothetical protein
AVR78_RS07685	55.2901	26.0608	1.0851	2.5109e-17	2.7466e-18	AVR78_RS07685	MBL fold metallo-hydrolase
AVR78_RS07745	27.645	9.92793	1.4775	1.2661e-10	1.0562e-11	AVR78_RS07745	ABC transporter permease
AVR78_RS07755	99.5222	23.1652	2.1031	6.5179e-40	1.5444e-40	AVR78_RS07755	methionine ABC transporter ATP-binding protein
AVR78_RS07760	116.109	36.4024	1.6734	6.1256e-42	1.5699e-42	AVR78_RS07760	ABC transporter substrate-binding protein
AVR78_RS07775	49.7611	18.2012	1.451	8.5532e-18	9.5559e-19	AVR78_RS07775	ABC transporter ATP-binding protein
AVR78_RS07810	221.16	110.448	1.0017	3.8692e-62	1.8533e-62	AVR78_RS07810	APC family permease
AVR78_RS07840	105.051	43.021	1.288	6.4273e-34	1.2618e-34	AVR78_RS07840	amidohydrolase
AVR78_RS07845	110.58	37.6434	1.5546	9.8053e-39	2.2264e-39	AVR78_RS07845	ABC transporter substrate-binding protein
AVR78_RS07865	22.116	9.92793	1.1555	5.5624e-08	4.2232e-09	AVR78_RS07865	cytosine deaminase
AVR78_RS07875	38.7031	7.03229	2.4604	1.7161e-17	1.8912e-18	AVR78_RS07875	creatininase
AVR78_RS07880	27.645	9.51427	1.5389	8.4252e-11	7.0954e-12	AVR78_RS07880	ABC transporter substrate-binding protein
AVR78_RS07885	49.7611	19.8559	1.3255	4.0391e-17	4.377e-18	AVR78_RS07885	ABC transporter ATP-binding protein
AVR78_RS07925	99.5222	49.6397	1.0035	6.1696e-29	1.0198e-29	AVR78_RS07925	4-oxalocrotonate tautomerase
AVR78_RS07955	82.9351	34.3341	1.2723	5.5178e-27	8.5889e-28	AVR78_RS07955	CoA transferase subunit A
AVR78_RS07970	38.7031	12.4099	1.641	6.2717e-15	6.2111e-16	AVR78_RS07970	3-hydroxyacyl-CoA dehydrogenase
AVR78_RS07980	77.4061	35.1614	1.1385	4.126e-24	5.7724e-25	AVR78_RS07980	3-hydroxybutyrate dehydrogenase
AVR78_RS07985	77.4061	33.0931	1.2259	6.8615e-25	9.8368e-26	AVR78_RS07985	LysR family transcriptional regulator
AVR78_RS07990	88.4641	18.2012	2.2811	7.7488e-37	1.6499e-37	AVR78_RS07990	acetolactate decarboxylase
AVR78_RS08000	93.9932	33.9204	1.4704	2.2714e-32	4.1967e-33	AVR78_RS08000	diacetyl reductase ((S)-acetoin forming)
AVR78_RS08010	16.587	5.37763	1.625	3.5129e-07	2.5804e-08	AVR78_RS08010	hypothetical protein
AVR78_RS08050	121.638	52.5353	1.2112	5.8957e-38	1.2999e-38	AVR78_RS08050	heme lyase CcmF/NrfE family subunit
AVR78_RS08065	143.754	45.503	1.6596	2.5816e-51	9.0034e-52	AVR78_RS08065	cytochrome c-type biogenesis protein CcmC heme lyase for CcmE
AVR78_RS08070	49.7611	18.2012	1.451	8.5532e-18	9.5559e-19	AVR78_RS08070	heme exporter protein CcmB
AVR78_RS08075	60.8191	16.5466	1.878	6.5968e-24	9.1618e-25	AVR78_RS08075	cytochrome c biogenesis heme-transporting ATPase CcmA
AVR78_RS08080	132.696	53.3626	1.3142	8.914e-43	2.3431e-43	AVR78_RS08080	gluconate dehydrogenase cytochrome c subunit
AVR78_RS08100	165.87	66.5999	1.3165	4.5407e-53	1.6991e-53	AVR78_RS08100	ABC transporter ATP-binding protein
AVR78_RS08105	265.392	66.1862	2.0035	2.6741e-101	2.912e-101	AVR78_RS08105	iron ABC transporter permease
AVR78_RS08160	49.7611	23.9925	1.0524	1.4917e-15	1.5115e-16	AVR78_RS08160	amino acid ABC transporter ATP-binding protein
AVR78_RS08165	77.4061	28.1291	1.4604	7.177e-27	1.1139e-27	AVR78_RS08165	amino acid ABC transporter permease
AVR78_RS08180	66.3481	32.6795	1.0217	5.6423e-20	6.8611e-21	AVR78_RS08180	MurR/RpiR family transcriptional regulator
AVR78_RS08185	38.7031	16.9602	1.1903	4.6396e-13	4.2758e-14	AVR78_RS08185	iron compound-binding protein of ABC transporter family
AVR78_RS08195	44.2321	21.5105	1.0401	6.3114e-14	6.0223e-15	AVR78_RS08195	iron ABC transporter permease
AVR78_RS08205	143.754	69.4955	1.0486	8.059e-42	2.0497e-42	AVR78_RS08205	TonB-dependent siderophore receptor
AVR78_RS08215	33.1741	10.7553	1.625	5.8685e-13	5.3841e-14	AVR78_RS08215	ABC transporter permease
AVR78_RS08220	71.8771	21.5105	1.7405	4.6134e-27	7.2021e-28	AVR78_RS08220	ABC transporter substrate-binding protein
AVR78_RS08230	77.4061	16.9602	2.1903	6.1699e-32	1.1183e-32	AVR78_RS08230	acyl-CoA dehydrogenase
AVR78_RS08245	55.2901	19.4422	1.5078	6.3255e-20	7.6745e-21	AVR78_RS08245	cysteine dioxygenase
AVR78_RS08250	127.167	43.021	1.5636	2.1246e-44	5.9107e-45	AVR78_RS08250	GlpE family protein
AVR78_RS08260	66.3481	20.6832	1.6816	9.761e-25	1.3934e-25	AVR78_RS08260	3-(3-hydroxy-phenyl)propionate transporter MhpT
AVR78_RS08265	121.638	55.0173	1.1446	5.0222e-37	1.0771e-37	AVR78_RS08265	4-hydroxy-2-oxovalerate aldolase
AVR78_RS08270	33.1741	10.3416	1.6816	3.8444e-13	3.5576e-14	AVR78_RS08270	acetaldehyde dehydrogenase (acetylating)
AVR78_RS08275	22.116	10.7553	1.0401	1.1311e-07	8.4842e-09	AVR78_RS08275	2-keto-4-pentenoate hydratase
AVR78_RS08290	99.5222	34.7478	1.5181	1.1542e-34	2.3101e-35	mhpA	3-(3-hydroxyphenyl)propionate hydroxylase
AVR78_RS08295	127.167	46.3304	1.4567	5.228e-43	1.3906e-43	AVR78_RS08295	DNA-binding transcriptional activator MhpR
AVR78_RS08305	88.4641	20.2695	2.1258	7.9808e-36	1.6493e-36	AVR78_RS08305	iron ABC transporter permease
AVR78_RS08320	88.4641	39.2981	1.1706	1.187e-27	1.8872e-28	AVR78_RS08320	shikimate dehydrogenase
AVR78_RS08325	60.8191	29.3701	1.0502	1.1927e-18	1.3786e-19	AVR78_RS08325	MFS transporter
AVR78_RS08400	210.102	69.0819	1.6047	4.893e-73	3.1305e-73	AVR78_RS08400	hypothetical protein
AVR78_RS08415	403.618	131.545	1.6174	4.7664e-139	8.0485e-139	AVR78_RS08415	AcrB/AcrD/AcrF family protein
AVR78_RS08420	55.2901	20.6832	1.4186	2.0826e-19	2.4639e-20	AVR78_RS08420	efflux RND transporter periplasmic adaptor subunit
AVR78_RS08430	132.696	56.2583	1.238	1.1899e-41	3.0034e-42	AVR78_RS08430	NAD-dependent epimerase
AVR78_RS08455	71.8771	23.9925	1.5829	5.7226e-26	8.6081e-27	AVR78_RS08455	MFS transporter
AVR78_RS08470	38.7031	17.3739	1.1555	6.6555e-13	6.0956e-14	AVR78_RS08470	hypothetical protein
AVR78_RS08505	16.587	4.5503	1.866	1.4577e-07	1.0881e-08	rprA	antisense sRNA RprA
AVR78_RS08790	22.116	4.13664	2.4186	1.4261e-10	1.1879e-11	AVR78_RS08790	RtT sRNA
AVR78_RS08795	165.87	70.3229	1.238	1.2681e-51	4.4991e-52	AVR78_RS08795	Lrp/AsnC family transcriptional regulator
AVR78_RS08810	27.645	7.85961	1.8145	1.5306e-11	1.3301e-12	AVR78_RS08810	nitrate reductase molybdenum cofactor assembly chaperone
AVR78_RS08815	248.805	70.7365	1.8145	4.7098e-91	4.3329e-91	AVR78_RS08815	nitrate reductase subunit beta
AVR78_RS08820	281.979	120.376	1.228	3.6791e-86	3.1766e-86	AVR78_RS08820	nitrate reductase subunit alpha
AVR78_RS08825	110.58	43.4347	1.3482	2.4067e-36	5.0559e-37	AVR78_RS08825	NarK family nitrate/nitrite MFS transporter
AVR78_RS08845	254.334	68.2545	1.8977	6.7489e-95	6.7437e-95	AVR78_RS08845	nitrate reductase
AVR78_RS08860	60.8191	21.0969	1.5275	6.9919e-22	9.0598e-23	AVR78_RS08860	ABC transporter ATP-binding protein
AVR78_RS08870	127.167	33.9204	1.9065	1.8357e-48	5.8936e-49	AVR78_RS08870	nitrate ABC transporter substrate-binding protein
AVR78_RS08990	33.1741	11.5826	1.5181	1.3416e-12	1.2154e-13	AVR78_RS08990	hypothetical protein
AVR78_RS09020	93.9932	31.4385	1.58	2.0247e-33	3.9143e-34	AVR78_RS09020	ABC transporter substrate-binding protein
AVR78_RS09025	99.5222	41.7801	1.2522	7.9776e-32	1.44e-32	AVR78_RS09025	MFS transporter
AVR78_RS09050	105.051	37.2298	1.4966	2.9055e-36	6.0941e-37	AVR78_RS09050	ABC transporter ATP-binding protein
AVR78_RS09055	71.8771	31.0248	1.2121	4.0887e-23	5.557e-24	AVR78_RS09055	ABC transporter ATP-binding protein
AVR78_RS09060	221.16	54.6036	2.018	5.3817e-85	4.5581e-85	AVR78_RS09060	branched-chain amino acid ABC transporter permease
AVR78_RS09065	121.638	34.7478	1.8076	2.2627e-45	6.4843e-46	AVR78_RS09065	branched-chain amino acid ABC transporter permease
AVR78_RS09090	110.58	38.4707	1.5233	2.201e-38	4.9222e-39	AVR78_RS09090	threonine/serine transporter TdcC
AVR78_RS09095	171.399	67.8409	1.3371	3.6386e-55	1.4318e-55	AVR78_RS09095	bifunctional threonine ammonia-lyase/L-serine ammonia-lyase TdcB
AVR78_RS09105	33.1741	16.1329	1.0401	8.2251e-11	6.9334e-12	AVR78_RS09105	quaternary amine ABC transporter ATP-binding protein
AVR78_RS09115	44.2321	13.6509	1.6961	4.4314e-17	4.7943e-18	AVR78_RS09115	ABC transporter permease
AVR78_RS09120	33.1741	15.3056	1.116	4.096e-11	3.4891e-12	AVR78_RS09120	quaternary amine ABC transporter substrate-binding protein
AVR78_RS09125	132.696	43.8484	1.5975	1.0606e-46	3.1792e-47	AVR78_RS09125	LLM class flavin-dependent oxidoreductase
AVR78_RS09130	82.9351	17.7875	2.2211	2.764e-34	5.4745e-35	AVR78_RS09130	phosphate ABC transporter substrate-binding protein
AVR78_RS09135	55.2901	22.7515	1.2811	1.4102e-18	1.6231e-19	AVR78_RS09135	fatty acid desaturase
AVR78_RS09140	259.863	93.9017	1.4685	2.5731e-86	2.2361e-86	AVR78_RS09140	ROK family transcriptional regulator
AVR78_RS09150	49.7611	16.5466	1.5885	1.6954e-18	1.9397e-19	AVR78_RS09150	sugar ABC transporter permease
AVR78_RS09155	60.8191	15.7192	1.952	2.7013e-24	3.8092e-25	AVR78_RS09155	carbohydrate ABC transporter permease
AVR78_RS09160	66.3481	23.9925	1.4675	2.5872e-23	3.5326e-24	AVR78_RS09160	carbohydrate kinase family protein
AVR78_RS09165	149.283	49.226	1.6006	2.3196e-52	8.4544e-53	AVR78_RS09165	sn-glycerol-3-phosphate ABC transporter ATP-binding protein UgpC
AVR78_RS09170	44.2321	19.4422	1.1859	1.0886e-14	1.0701e-15	AVR78_RS09170	proteasome-type protease
AVR78_RS09175	82.9351	30.6111	1.4379	1.7787e-28	2.8848e-29	AVR78_RS09175	transglutaminase family protein
AVR78_RS09180	160.341	32.6795	2.2947	1.7553e-65	9.4605e-66	AVR78_RS09180	alpha-E domain-containing protein
AVR78_RS09185	127.167	53.3626	1.2528	3.3621e-40	8.0593e-41	AVR78_RS09185	circularly permuted type 2 ATP-grasp protein
AVR78_RS09190	154.812	69.4955	1.1555	7.62e-47	2.2972e-47	AVR78_RS09190	glycoporin
AVR78_RS09195	204.573	83.9738	1.2846	2.5991e-64	1.3491e-64	AVR78_RS09195	MFS transporter
AVR78_RS09215	154.812	55.431	1.4818	2.2385e-52	8.1924e-53	AVR78_RS09215	hypothetical protein
AVR78_RS09270	77.4061	13.6509	2.5035	1.4052e-33	2.7325e-34	AVR78_RS09270	DUF1971 domain-containing protein
AVR78_RS09385	110.58	33.0931	1.7405	1.0015e-40	2.4559e-41	AVR78_RS09385	DUF986 domain-containing protein
AVR78_RS09390	77.4061	17.7875	2.1216	1.5612e-31	2.8049e-32	AVR78_RS09390	hypothetical protein
AVR78_RS09585	22.116	5.37763	2.0401	5.9304e-10	4.8356e-11	AVR78_RS09585	hypothetical protein
AVR78_RS09600	138.225	62.0496	1.1555	5.1669e-42	1.3306e-42	AVR78_RS09600	sodium:citrate symporter family protein
AVR78_RS09610	127.167	45.503	1.4827	2.3705e-43	6.3625e-44	AVR78_RS09610	NAD-dependent malic enzyme
AVR78_RS09615	49.7611	21.5105	1.21	1.79e-16	1.8772e-17	AVR78_RS09615	two-component system response regulator DcuR
AVR78_RS09715	154.812	52.1217	1.5706	8.9796e-54	3.3982e-54	AVR78_RS09715	glycoside hydrolase family 105 protein
AVR78_RS09720	149.283	54.6036	1.451	4.3089e-50	1.446e-50	AVR78_RS09720	MFS transporter
AVR78_RS09740	199.044	95.97	1.0524	2.5844e-57	1.0841e-57	araH	L-arabinose ABC transporter permease AraH
AVR78_RS09750	165.87	54.6036	1.603	5.1033e-58	2.1855e-58	AVR78_RS09750	arabinose ABC transporter substrate-binding protein
AVR78_RS09755	82.9351	23.9925	1.7894	2.4098e-31	4.3092e-32	AVR78_RS09755	hypothetical protein
AVR78_RS09770	154.812	67.0136	1.208	8.9406e-48	2.8096e-48	AVR78_RS09770	MFS transporter
AVR78_RS09780	193.515	78.5961	1.2999	2.9185e-61	1.366e-61	AVR78_RS09780	MFS transporter
AVR78_RS09800	182.457	87.2831	1.0638	6.2074e-53	2.3098e-53	AVR78_RS09800	DUF2492 domain-containing protein
AVR78_RS09825	22.116	7.85961	1.4926	8.1199e-09	6.3473e-10	AVR78_RS09825	tRNA-Leu
AVR78_RS09975	77.4061	34.7478	1.1555	2.896e-24	4.075e-25	AVR78_RS09975	nitrogen assimilation transcriptional regulator
AVR78_RS09990	265.392	95.1427	1.48	1.9968e-88	1.7817e-88	AVR78_RS09990	Na+/H+ antiporter
AVR78_RS10030	11.058	5.37763	1.0401	0.00017635	1.1376e-05	AVR78_RS10030	tRNA-Asn
AVR78_RS10045	22.116	9.92793	1.1555	5.5624e-08	4.2232e-09	AVR78_RS10045	tRNA-Asn
AVR78_RS10065	55.2901	12.4099	2.1555	3.8852e-23	5.2858e-24	AVR78_RS10065	hypothetical protein
AVR78_RS10075	127.167	51.2943	1.3099	5.2599e-41	1.3054e-41	AVR78_RS10075	DUF1869 domain-containing protein
AVR78_RS10095	22.116	5.37763	2.0401	5.9304e-10	4.8356e-11	AVR78_RS10095	hypothetical protein
AVR78_RS10105	49.7611	22.3379	1.1555	3.6827e-16	3.8127e-17	AVR78_RS10105	biotin/lipoate A/B protein ligase
AVR78_RS10115	71.8771	26.8882	1.4186	9.4519e-25	1.35e-25	AVR78_RS10115	tautomerase family protein
AVR78_RS10175	359.386	132.372	1.4409	1.3216e-117	1.7989e-117	AVR78_RS10175	pyruvate:ferredoxin (flavodoxin) oxidoreductase
AVR78_RS10180	116.109	35.1614	1.7234	1.724e-42	4.5049e-43	AVR78_RS10180	nitrogenase iron protein
AVR78_RS10185	160.341	69.4955	1.2062	2.1977e-49	7.2297e-50	AVR78_RS10185	nitrogenase molybdenum-iron protein alpha chain
AVR78_RS10190	105.051	31.8521	1.7216	1.3666e-38	3.0924e-39	AVR78_RS10190	nitrogenase molybdenum-iron protein subunit beta
AVR78_RS10215	33.1741	9.10061	1.866	1.04e-13	9.8357e-15	AVR78_RS10215	dinitrogenase iron-molybdenum cofactor biosynthesis protein
AVR78_RS10225	71.8771	20.2695	1.8262	1.2587e-27	1.9965e-28	AVR78_RS10225	cysteine desulfurase NifS
AVR78_RS10230	71.8771	24.4062	1.5583	8.6172e-26	1.2837e-26	AVR78_RS10230	homocitrate synthase
AVR78_RS10235	5.52901	1.24099	2.1555	0.0017315	0.00010632	AVR78_RS10235	NifW protein
AVR78_RS10240	11.058	5.37763	1.0401	0.00017635	1.1376e-05	AVR78_RS10240	nitrogen fixation protein NifZ
AVR78_RS10245	33.1741	11.9963	1.4675	2.0092e-12	1.8092e-13	AVR78_RS10245	nitrogen fixation protein NifM
AVR78_RS10250	121.638	32.2658	1.9145	1.6223e-46	4.8307e-47	AVR78_RS10250	flavodoxin
AVR78_RS10255	165.87	44.262	1.9059	1.176e-62	5.7044e-63	AVR78_RS10255	nitrogen fixation negative regulator NifL
AVR78_RS10260	121.638	43.021	1.4995	9.404e-42	2.3827e-42	AVR78_RS10260	nif-specific transcriptional activator NifA
AVR78_RS10265	121.638	28.9565	2.0706	4.4022e-48	1.3949e-48	AVR78_RS10265	nitrogenase cofactor biosynthesis protein NifB
AVR78_RS10270	55.2901	19.8559	1.4775	9.4454e-20	1.1322e-20	AVR78_RS10270	NifQ family protein
AVR78_RS10305	60.8191	26.8882	1.1776	1.4594e-19	1.7383e-20	AVR78_RS10305	histidinol-phosphate transaminase
AVR78_RS10320	93.9932	43.4347	1.1137	1.1804e-28	1.9226e-29	AVR78_RS10320	1-(5-phosphoribosyl)-5-[(5-phosphoribosylamino)methylideneamino]imidazole-4-carboxamide isomerase
AVR78_RS10520	99.5222	49.226	1.0156	4.418e-29	7.3393e-30	AVR78_RS10520	DNA-3-methyladenine glycosylase 2
AVR78_RS10530	116.109	42.6074	1.4463	2.7125e-39	6.337e-40	AVR78_RS10530	histidine kinase
AVR78_RS10535	82.9351	29.7838	1.4775	8.0721e-29	1.3261e-29	AVR78_RS10535	DNA-binding response regulator
AVR78_RS10545	132.696	42.6074	1.639	3.0695e-47	9.4023e-48	AVR78_RS10545	positive transcription regulator
AVR78_RS10550	193.515	90.5924	1.095	9.5791e-57	3.9379e-57	AVR78_RS10550	dicarboxylate/amino acid:cation symporter
AVR78_RS10575	105.051	39.7117	1.4035	3.0775e-35	6.2629e-36	AVR78_RS10575	two-component system sensor histidine kinase BaeA
AVR78_RS10595	127.167	61.2223	1.0546	2.7651e-37	5.9734e-38	AVR78_RS10595	ABC transporter ATP-binding protein
AVR78_RS10605	60.8191	30.1975	1.0101	2.3472e-18	2.6784e-19	AVR78_RS10605	ABC transporter permease
AVR78_RS10610	182.457	43.8484	2.057	5.0799e-71	3.0873e-71	AVR78_RS10610	ABC transporter permease
AVR78_RS10615	116.109	36.4024	1.6734	6.1256e-42	1.5699e-42	AVR78_RS10615	ABC transporter substrate-binding protein
AVR78_RS10620	187.986	67.0136	1.4881	2.4594e-63	1.2242e-63	AVR78_RS10620	mandelate racemase
AVR78_RS10625	110.58	40.1254	1.4625	1.0842e-37	2.369e-38	AVR78_RS10625	hypothetical protein
AVR78_RS10630	88.4641	24.4062	1.8578	7.2673e-34	1.4257e-34	AVR78_RS10630	MFS transporter
AVR78_RS10635	276.45	81.4918	1.7623	1.198e-99	1.2683e-99	AVR78_RS10635	xylulokinase
AVR78_RS10640	204.573	86.4558	1.2426	2.3628e-63	1.1783e-63	AVR78_RS10640	mannitol dehydrogenase family protein
AVR78_RS10675	60.8191	21.9242	1.472	1.5604e-21	1.9995e-22	AVR78_RS10675	bifunctional hydroxymethylpyrimidine kinase/phosphomethylpyrimidine kinase
AVR78_RS10715	171.399	79.4235	1.1097	9.2364e-51	3.1674e-51	AVR78_RS10715	NCS2 family permease
AVR78_RS10910	55.2901	21.0969	1.39	3.0752e-19	3.6223e-20	AVR78_RS10910	hypothetical protein
AVR78_RS10960	193.515	58.3266	1.7302	9.5991e-70	5.641e-70	AVR78_RS10960	sugar efflux transporter SetB
AVR78_RS10965	182.457	77.3552	1.238	1.3192e-56	5.3814e-57	AVR78_RS10965	HlyD family secretion protein
AVR78_RS10970	38.7031	14.8919	1.3779	7.0935e-14	6.7565e-15	AVR78_RS10970	DUF3302 domain-containing protein
AVR78_RS11035	232.218	101.348	1.1962	1.9027e-70	1.1356e-70	AVR78_RS11035	microcin C ABC transporter ATP-binding protein YejF
AVR78_RS11075	154.812	59.5676	1.3779	1.1057e-50	3.782e-51	AVR78_RS11075	serine hydrolase
AVR78_RS11080	165.87	45.9167	1.853	6.8483e-62	3.251e-62	AVR78_RS11080	NUDIX hydrolase
AVR78_RS11085	110.58	53.3626	1.0512	1.3429e-32	2.509e-33	AVR78_RS11085	DeoR/GlpR transcriptional regulator
AVR78_RS11105	5.52901	0	2.7405	0.0010401	6.4457e-05	AVR78_RS11105	tRNA-Pro
AVR78_RS11210	27.645	12.8236	1.1082	1.7892e-09	1.4287e-10	AVR78_RS11210	oxidoreductase
AVR78_RS11225	121.638	49.6397	1.293	4.5123e-39	1.036e-39	AVR78_RS11225	anaerobic glycerol-3-phosphate dehydrogenase subunit A
AVR78_RS11230	49.7611	20.6832	1.2666	8.5691e-17	9.1448e-18	AVR78_RS11230	glycerol-3-phosphate dehydrogenase subunit GlpB
AVR78_RS11235	88.4641	30.6111	1.531	4.0702e-31	7.2153e-32	AVR78_RS11235	anaerobic glycerol-3-phosphate dehydrogenase subunit C
AVR78_RS11240	93.9932	38.8844	1.2734	2.26e-30	3.9383e-31	AVR78_RS11240	2-keto-3-deoxy-L-rhamnonate aldolase
AVR78_RS11245	160.341	62.4633	1.3601	4.0324e-52	1.4558e-52	AVR78_RS11245	MFS transporter
AVR78_RS11255	60.8191	23.5788	1.367	7.4619e-21	9.3202e-22	AVR78_RS11255	IclR family transcriptional regulator
AVR78_RS11270	22.116	9.92793	1.1555	5.5624e-08	4.2232e-09	AVR78_RS11270	hypothetical protein
AVR78_RS11305	149.283	67.8409	1.1378	6.2828e-45	1.7775e-45	AVR78_RS11305	tripartite tricarboxylate transporter permease
AVR78_RS11705	22.116	10.7553	1.0401	1.1311e-07	8.4842e-09	AVR78_RS11705	hypothetical protein
AVR78_RS11710	11.058	0	3.7405	1.4939e-06	1.0597e-07	AVR78_RS11710	hypothetical protein
AVR78_RS11715	5.52901	2.06832	1.4186	0.0043884	0.00026376	AVR78_RS11715	kinase
AVR78_RS11785	5.52901	0	3.7405	0.0006674	4.1749e-05	AVR78_RS11785	hypothetical protein
AVR78_RS11800	138.225	42.1937	1.7119	4.2472e-50	1.4271e-50	AVR78_RS11800	phage major capsid protein
AVR78_RS11805	93.9932	30.1975	1.6381	5.8649e-34	1.1531e-34	AVR78_RS11805	Clp protease ClpP
AVR78_RS11810	215.631	90.5924	1.2511	6.9508e-67	3.8236e-67	AVR78_RS11810	phage portal protein
AVR78_RS11815	287.508	100.934	1.5102	1.5782e-96	1.6195e-96	AVR78_RS11815	terminase large subunit
AVR78_RS11830	11.058	2.06832	2.4186	5.768e-06	3.9878e-07	AVR78_RS11830	Eag protein
AVR78_RS11880	105.051	38.4707	1.4493	9.5396e-36	1.9654e-36	AVR78_RS11880	antitermination protein from phage origin
AVR78_RS11895	11.058	0	4.467	1.3855e-06	9.8728e-08	AVR78_RS11895	retron adenine methylase
AVR78_RS11900	110.58	49.6397	1.1555	5.9211e-34	1.1633e-34	AVR78_RS11900	helix-turn-helix domain-containing protein
AVR78_RS11910	11.058	3.72298	1.5706	3.6911e-05	2.4705e-06	AVR78_RS11910	hypothetical protein
AVR78_RS11935	110.58	26.8882	2.0401	1.3331e-43	3.6107e-44	AVR78_RS11935	hypothetical protein
AVR78_RS11940	44.2321	18.6149	1.2486	5.2347e-15	5.2015e-16	AVR78_RS11940	hypothetical protein
AVR78_RS11960	82.9351	31.0248	1.4186	2.6306e-28	4.2407e-29	AVR78_RS11960	hypothetical protein
AVR78_RS11980	77.4061	36.4024	1.0884	1.1766e-23	1.6232e-24	AVR78_RS11980	tRNA-Arg
AVR78_RS11985	49.7611	20.6832	1.2666	8.5691e-17	9.1448e-18	AVR78_RS11985	GGDEF domain-containing protein
AVR78_RS12010	49.7611	18.6149	1.4186	1.2686e-17	1.4044e-18	AVR78_RS12010	cyanate transporter
AVR78_RS12040	171.399	85.2148	1.0082	1.0749e-48	3.4676e-49	AVR78_RS12040	ion channel protein
AVR78_RS12075	11.058	3.30931	1.7405	2.3844e-05	1.6097e-06	AVR78_RS12075	tRNA-Ala
AVR78_RS12100	27.645	4.5503	2.603	3.6366e-13	3.3712e-14	AVR78_RS12100	tRNA-Val
AVR78_RS12125	259.863	94.729	1.4559	5.6524e-86	4.8647e-86	AVR78_RS12125	LysR family transcriptional regulator
AVR78_RS12215	121.638	45.0894	1.4317	6.7776e-41	1.6774e-41	AVR78_RS12215	sulfate/thiosulfate transporter permease subunit
AVR78_RS12220	93.9932	45.503	1.0466	6.5934e-28	1.0521e-28	AVR78_RS12220	sulfate/thiosulfate ABC transporter permease CysT
AVR78_RS12235	66.3481	19.8559	1.7405	4.1667e-25	6.0481e-26	AVR78_RS12235	endonuclease domain-containing protein
AVR78_RS12250	66.3481	22.3379	1.5706	5.1547e-24	7.1964e-25	AVR78_RS12250	DUF2919 domain-containing protein
AVR78_RS12275	66.3481	27.3018	1.2811	5.6213e-22	7.3194e-23	AVR78_RS12275	ethanolamine utilization microcompartment protein EutK
AVR78_RS12280	60.8191	27.3018	1.1555	2.0868e-19	2.4679e-20	AVR78_RS12280	ethanolamine utilization microcompartment protein EutL
AVR78_RS12285	110.58	36.4024	1.603	2.8742e-39	6.6971e-40	AVR78_RS12285	ethanolamine ammonia-lyase subunit EutC
AVR78_RS12290	149.283	67.0136	1.1555	3.1052e-45	8.8606e-46	AVR78_RS12290	ethanolamine ammonia lyase large subunit
AVR78_RS12295	93.9932	41.7801	1.1697	2.88e-29	4.8234e-30	eutA	ethanolamine ammonia-lyase reactivating factor EutA
AVR78_RS12305	204.573	40.9527	2.3206	2.128e-83	1.7204e-83	AVR78_RS12305	ethanolamine utilization ethanol dehydrogenase EutG
AVR78_RS12310	55.2901	26.4745	1.0624	3.5456e-17	3.8531e-18	AVR78_RS12310	ethanolamine utilization protein EutJ
AVR78_RS12315	165.87	57.0856	1.5389	5.8779e-57	2.4465e-57	AVR78_RS12315	aldehyde dehydrogenase EutE
AVR78_RS12320	49.7611	17.3739	1.5181	3.8402e-18	4.3523e-19	AVR78_RS12320	ethanolamine utilization microcompartment protein EutN
AVR78_RS12325	66.3481	18.6149	1.8336	1.1345e-25	1.6834e-26	AVR78_RS12325	ethanolamine utilization microcompartment protein EutM
AVR78_RS12330	44.2321	14.4782	1.6112	1.0288e-16	1.0922e-17	AVR78_RS12330	phosphate acetyltransferase
AVR78_RS12335	27.645	8.27328	1.7405	2.3716e-11	2.0424e-12	AVR78_RS12335	ethanolamine utilization cob(I)yrinic acid a%2Cc-diamide adenosyltransferase EutT
AVR78_RS12340	88.4641	30.6111	1.531	4.0702e-31	7.2153e-32	AVR78_RS12340	ethanolamine utilization acetate kinase EutQ
AVR78_RS12350	16.587	8.27328	1.0035	5.1829e-06	3.5907e-07	AVR78_RS12350	carboxysome shell protein
AVR78_RS12385	359.386	157.606	1.1892	1.0448e-107	1.2905e-107	AVR78_RS12385	multidrug efflux RND transporter permease subunit
AVR78_RS12425	33.1741	14.8919	1.1555	2.8671e-11	2.4596e-12	AVR78_RS12425	addiction module toxin RelE
AVR78_RS12510	237.747	108.794	1.1278	3.2778e-70	1.9477e-70	AVR78_RS12510	polygalacturonase
AVR78_RS12515	121.638	42.6074	1.5134	6.3029e-42	1.6123e-42	AVR78_RS12515	MFS transporter
AVR78_RS12520	121.638	41.3664	1.5561	1.8782e-42	4.8888e-43	AVR78_RS12520	glycosyl hydrolase
AVR78_RS12540	281.979	118.308	1.253	5.9486e-87	5.2206e-87	AVR78_RS12540	sensor domain-containing phosphodiesterase
AVR78_RS12550	171.399	83.1465	1.0436	2.0115e-49	6.6255e-50	AVR78_RS12550	LysR family transcriptional regulator
AVR78_RS12645	121.638	52.5353	1.2112	5.8957e-38	1.2999e-38	AVR78_RS12645	hypothetical protein
AVR78_RS12710	132.696	51.708	1.3597	1.9627e-43	5.284e-44	AVR78_RS12710	hypothetical protein
AVR78_RS12745	49.7611	19.0285	1.3869	1.8738e-17	2.0573e-18	AVR78_RS12745	hypothetical protein
AVR78_RS12750	11.058	4.13664	1.4186	5.6058e-05	3.7075e-06	AVR78_RS12750	hypothetical protein
AVR78_RS12755	248.805	106.725	1.2211	4.7424e-76	3.2032e-76	AVR78_RS12755	NO-inducible flavohemoprotein
AVR78_RS12810	116.109	50.467	1.2021	3.4598e-36	7.2511e-37	acpS	holo-ACP synthase
AVR78_RS12835	44.2321	15.7192	1.4926	3.5109e-16	3.6461e-17	AVR78_RS12835	hypothetical protein
AVR78_RS13015	259.863	97.211	1.4186	5.8796e-85	4.9484e-85	AVR78_RS13015	PepSY domain-containing protein
AVR78_RS13070	33.1741	2.48198	3.7405	7.7666e-17	8.3217e-18	AVR78_RS13070	molecular chaperone GrpE
AVR78_RS13125	27.645	8.27328	1.7405	2.3716e-11	2.0424e-12	AVR78_RS13125	late control gene D protein
AVR78_RS13135	514.198	211.382	1.2825	1.2006e-158	2.4266e-158	AVR78_RS13135	phage tail tape measure protein
AVR78_RS13160	232.218	88.5241	1.3913	1.9005e-75	1.2676e-75	AVR78_RS13160	phage tail fiber protein
AVR78_RS13165	5.52901	0	2.7405	0.0010401	6.4457e-05	AVR78_RS13165	hypothetical protein
AVR78_RS13170	326.212	105.071	1.6344	2.6834e-113	3.5095e-113	AVR78_RS13170	hypothetical protein
AVR78_RS13175	99.5222	21.5105	2.21	1.0211e-40	2.5016e-41	AVR78_RS13175	phage tail protein I
AVR78_RS13180	93.9932	34.7478	1.4356	4.9957e-32	9.0916e-33	AVR78_RS13180	baseplate assembly protein J
AVR78_RS13190	11.058	5.37763	1.0401	0.00017635	1.1376e-05	AVR78_RS13190	phage baseplate assembly protein V
AVR78_RS13200	116.109	22.7515	2.3514	2.2849e-48	7.3182e-49	AVR78_RS13200	phage virion morphogenesis protein
AVR78_RS13205	5.52901	1.24099	2.1555	0.0017315	0.00010632	AVR78_RS13205	hypothetical protein
AVR78_RS13220	27.645	11.9963	1.2044	8.6923e-10	7.036e-11	AVR78_RS13220	lysozyme
AVR78_RS13235	60.8191	13.6509	2.1555	2.7404e-25	4.0238e-26	AVR78_RS13235	head completion/stabilization protein
AVR78_RS13245	71.8771	26.4745	1.4409	6.3868e-25	9.1721e-26	AVR78_RS13245	phage capsid protein
AVR78_RS13250	110.58	42.6074	1.3759	1.121e-36	2.3793e-37	AVR78_RS13250	phage capsid scaffolding protein
AVR78_RS13255	215.631	66.1862	1.704	5.6883e-77	3.9521e-77	AVR78_RS13255	oxidoreductase
AVR78_RS13295	287.508	106.725	1.4297	3.9408e-94	3.9085e-94	AVR78_RS13295	replication endonuclease
AVR78_RS13300	27.645	10.3416	1.4186	1.8884e-10	1.5671e-11	AVR78_RS13300	DNA adenine methylase
AVR78_RS13310	11.058	1.24099	3.1555	2.1911e-06	1.5396e-07	AVR78_RS13310	DUF2732 domain-containing protein
AVR78_RS13315	16.587	6.61862	1.3255	1.1949e-06	8.5468e-08	AVR78_RS13315	hypothetical protein
AVR78_RS13350	82.9351	33.0931	1.3255	1.7944e-27	2.8378e-28	AVR78_RS13350	transposase
AVR78_RS13355	110.58	53.3626	1.0512	1.3429e-32	2.509e-33	AVR78_RS13355	alpha/beta hydrolase
AVR78_RS13360	143.754	71.1502	1.0147	3.0936e-41	7.7135e-42	AVR78_RS13360	hypothetical protein
AVR78_RS13365	431.263	131.545	1.713	2.2062e-152	4.2044e-152	AVR78_RS13365	phytanoyl-CoA dioxygenase family protein
AVR78_RS13385	77.4061	29.7838	1.3779	3.4198e-26	5.1811e-27	AVR78_RS13385	phytanoyl-CoA dioxygenase
AVR78_RS13390	243.276	81.9055	1.5706	1.8855e-83	1.5337e-83	AVR78_RS13390	thiamine pyrophosphate-binding protein
AVR78_RS13395	138.225	39.7117	1.7994	3.25e-51	1.129e-51	AVR78_RS13395	Bcr/CflA family drug resistance efflux transporter
AVR78_RS13400	149.283	64.1179	1.2193	2.5346e-46	7.5051e-47	AVR78_RS13400	3-oxoacyl-ACP reductase
AVR78_RS13405	138.225	23.5788	2.5515	5.4977e-59	2.4365e-59	AVR78_RS13405	hypothetical protein
AVR78_RS13415	138.225	67.4272	1.0356	4.5965e-40	1.0969e-40	AVR78_RS13415	LysR family transcriptional regulator
AVR78_RS13420	105.051	27.3018	1.944	1.1237e-40	2.7428e-41	AVR78_RS13420	hypothetical protein
AVR78_RS13430	193.515	69.4955	1.4775	6.2309e-65	3.3049e-65	AVR78_RS13430	multidrug efflux RND transporter periplasmic adaptor subunit OqxA
AVR78_RS13435	569.488	210.969	1.4326	1.0426e-184	2.4835e-184	AVR78_RS13435	multidrug efflux RND transporter permease subunit OqxB
AVR78_RS13455	27.645	11.5826	1.2551	5.9975e-10	4.8843e-11	AVR78_RS13455	AP endonuclease
AVR78_RS13460	38.7031	17.3739	1.1555	6.6555e-13	6.0956e-14	AVR78_RS13460	isopenicillin N synthase family oxygenase
AVR78_RS13465	60.8191	23.1652	1.3926	5.0713e-21	6.376e-22	AVR78_RS13465	ABC transporter substrate-binding protein
AVR78_RS13470	132.696	56.2583	1.238	1.1899e-41	3.0034e-42	AVR78_RS13470	amino acid ABC transporter permease/ATP-binding protein
AVR78_RS13480	66.3481	20.2695	1.7107	6.3876e-25	9.1721e-26	AVR78_RS13480	glyoxylate/hydroxypyruvate reductase A
AVR78_RS13500	66.3481	27.7155	1.2594	8.1495e-22	1.0534e-22	AVR78_RS13500	type 1 fimbrial protein
AVR78_RS13505	55.2901	19.8559	1.4775	9.4454e-20	1.1322e-20	AVR78_RS13505	molecular chaperone
AVR78_RS13510	105.051	45.0894	1.2202	4.0422e-33	7.7252e-34	AVR78_RS13510	fimbrial protein
AVR78_RS13515	215.631	72.3912	1.5747	2.8657e-74	1.8831e-74	AVR78_RS13515	fimbrial biogenesis outer membrane usher protein
AVR78_RS13520	116.109	21.0969	2.4604	3.4284e-49	1.1209e-49	AVR78_RS13520	molecular chaperone
AVR78_RS13525	110.58	31.4385	1.8145	1.7852e-41	4.4849e-42	AVR78_RS13525	fimbrial-like protein
AVR78_RS13530	293.037	146.437	1.0008	1.0602e-81	8.1278e-82	AVR78_RS13530	aldehyde dehydrogenase
AVR78_RS13570	149.283	74.4595	1.0035	1.4848e-42	3.8837e-43	AVR78_RS13570	hypothetical protein
AVR78_RS13600	237.747	83.9738	1.5014	6.1724e-80	4.5491e-80	AVR78_RS13600	PLP-dependent aminotransferase family protein
AVR78_RS13605	66.3481	24.8198	1.4186	5.6887e-23	7.6924e-24	AVR78_RS13605	carboxymuconolactone decarboxylase family protein
AVR78_RS13680	193.515	49.6397	1.9629	1.0006e-73	6.527e-74	AVR78_RS13680	2-isopropylmalate synthase
AVR78_RS13750	55.2901	23.9925	1.2044	4.2583e-18	4.8221e-19	AVR78_RS13750	hypothetical protein
AVR78_RS13775	221.16	85.6284	1.3689	2.0609e-71	1.2757e-71	AVR78_RS13775	metal ABC transporter substrate-binding protein
AVR78_RS13780	105.051	45.0894	1.2202	4.0422e-33	7.7252e-34	AVR78_RS13780	metal ABC transporter permease
AVR78_RS13795	93.9932	29.3701	1.6782	2.5388e-34	5.0397e-35	srlA	PTS glucitol/sorbitol transporter subunit IIC
AVR78_RS13800	110.58	37.2298	1.5706	6.5259e-39	1.4907e-39	srlE	PTS glucitol/sorbitol transporter subunit IIB
AVR78_RS13805	60.8191	12.8236	2.2457	1.0754e-25	1.5975e-26	AVR78_RS13805	PTS glucitol/sorbitol transporter subunit IIA
AVR78_RS13810	88.4641	31.0248	1.5117	6.0887e-31	1.0758e-31	AVR78_RS13810	sorbitol 6-phosphate dehydrogenase
AVR78_RS13835	116.109	44.6757	1.3779	1.8907e-38	4.2426e-39	AVR78_RS13835	anaerobic nitric oxide reductase flavorubredoxin
AVR78_RS13840	116.109	35.5751	1.7065	2.6355e-42	6.8466e-43	AVR78_RS13840	NADH:flavorubredoxin reductase NorW
AVR78_RS13845	5.52901	1.24099	2.1555	0.0017315	0.00010632	AVR78_RS13845	LysR family transcriptional regulator
AVR78_RS13850	110.58	52.1217	1.0851	4.8138e-33	9.154e-34	AVR78_RS13850	D-isomer specific 2-hydroxyacid dehydrogenase
AVR78_RS13855	71.8771	21.5105	1.7405	4.6134e-27	7.2021e-28	AVR78_RS13855	hypothetical protein
AVR78_RS13865	199.044	91.0061	1.1291	4.1609e-59	1.8502e-59	AVR78_RS13865	MFS transporter
AVR78_RS13870	243.276	67.8409	1.8424	1.1208e-89	1.0206e-89	AVR78_RS13870	MFS transporter
AVR78_RS13875	44.2321	16.1329	1.4551	5.2362e-16	5.4001e-17	AVR78_RS13875	amidohydrolase
AVR78_RS13880	171.399	76.1142	1.1711	5.5611e-52	2.0023e-52	AVR78_RS13880	HoxN/HupN/NixA family nickel/cobalt transporter
AVR78_RS13885	237.747	58.7403	2.017	3.2981e-91	3.0552e-91	AVR78_RS13885	carbamoyltransferase HypF
AVR78_RS13905	116.109	44.6757	1.3779	1.8907e-38	4.2426e-39	AVR78_RS13905	PTS cellobiose/arbutin/salicin transporter subunit IIBC
AVR78_RS13910	149.283	71.1502	1.0691	1.0031e-43	2.728e-44	AVR78_RS13910	6-phospho-beta-glucosidase
AVR78_RS13915	116.109	26.0608	2.1555	9.6771e-47	2.9107e-47	AVR78_RS13915	type I toxin-antitoxin system SymE family toxin
AVR78_RS13920	60.8191	11.5826	2.3926	2.5998e-26	3.9522e-27	AVR78_RS13920	hydrogenase maturation peptidase HycI
AVR78_RS13925	27.645	10.7553	1.362	2.7958e-10	2.3058e-11	AVR78_RS13925	formate hydrogenlyase maturation protein HycH
AVR78_RS13930	33.1741	12.4099	1.4186	2.9906e-12	2.6711e-13	AVR78_RS13930	NADH-quinone oxidoreductase subunit NuoB
AVR78_RS13940	154.812	45.503	1.7665	1.1117e-56	4.5632e-57	hycE	hydrogenase large subunit
AVR78_RS13945	60.8191	19.0285	1.6764	8.8461e-23	1.1866e-23	hycD	hydrogenase 3 membrane subunit
AVR78_RS13950	121.638	47.1577	1.367	4.6836e-40	1.1167e-40	AVR78_RS13950	formate hydrogenlyase subunit 3
AVR78_RS13955	22.116	8.68694	1.3482	1.8009e-08	1.3918e-09	AVR78_RS13955	4Fe-4S ferredoxin
AVR78_RS13960	49.7611	12.4099	2.0035	2.2043e-20	2.7201e-21	AVR78_RS13960	hypothetical protein
AVR78_RS13965	99.5222	23.5788	2.0775	1.0315e-39	2.4269e-40	AVR78_RS13965	formate hydrogenlyase regulatory protein HycA
AVR78_RS13970	38.7031	10.3416	1.904	7.1516e-16	7.3385e-17	AVR78_RS13970	hydrogenase nickel incorporation protein HypA
AVR78_RS13980	5.52901	1.65466	1.7405	0.0028094	0.00017089	AVR78_RS13980	hydrogenase assembly chaperone
AVR78_RS13985	110.58	40.1254	1.4625	1.0842e-37	2.369e-38	AVR78_RS13985	hydrogenase formation protein HypD
AVR78_RS14000	254.334	94.3154	1.4312	1.5817e-83	1.2905e-83	AVR78_RS14000	glycoside hydrolase family 1 protein
AVR78_RS14005	298.566	120.79	1.3056	1.0811e-93	1.0565e-93	AVR78_RS14005	beta-1%2C4 mannanase
AVR78_RS14010	154.812	62.4633	1.3094	1.5687e-49	5.1797e-50	AVR78_RS14010	carbohydrate porin
AVR78_RS14015	60.8191	24.8198	1.293	2.3307e-20	2.8722e-21	AVR78_RS14015	hypothetical protein
AVR78_RS14025	77.4061	7.44595	3.3779	1.5275e-36	3.2344e-37	AVR78_RS14025	PTS sugar transporter subunit IIB
AVR78_RS14030	66.3481	30.6111	1.116	1.0127e-20	1.2602e-21	AVR78_RS14030	PTS sugar transporter subunit IIC
AVR78_RS14035	27.645	5.37763	2.362	9.5338e-13	8.6752e-14	AVR78_RS14035	molecular chaperone TorD
AVR78_RS14040	60.8191	28.9565	1.0706	8.4661e-19	9.8376e-20	AVR78_RS14040	NAGC-like transcriptional regulator
AVR78_RS14085	93.9932	22.3379	2.0731	1.4359e-37	3.1247e-38	AVR78_RS14085	hemin-degrading factor
AVR78_RS14095	88.4641	29.7838	1.5706	1.806e-31	3.2337e-32	AVR78_RS14095	iron ABC transporter permease
AVR78_RS14100	33.1741	12.8236	1.3713	4.4239e-12	3.9303e-13	AVR78_RS14100	heme ABC transporter ATP-binding protein
AVR78_RS14115	71.8771	25.2335	1.5102	1.9369e-25	2.8597e-26	AVR78_RS14115	hypothetical protein
AVR78_RS14120	193.515	55.431	1.8037	4.7636e-71	2.9016e-71	AVR78_RS14120	UbiD family decarboxylase
AVR78_RS14125	116.109	38.8844	1.5782	7.3602e-41	1.8165e-41	AVR78_RS14125	phenolic acid decarboxylase subunit B
AVR78_RS14145	99.5222	45.503	1.1291	2.0215e-30	3.5296e-31	AVR78_RS14145	hypothetical protein
AVR78_RS14195	77.4061	19.4422	1.9933	9.7231e-31	1.7111e-31	AVR78_RS14195	adenylyl-sulfate kinase
AVR78_RS14200	127.167	48.8123	1.3814	5.3955e-42	1.3868e-42	AVR78_RS14200	sulfate adenylyltransferase subunit CysN
AVR78_RS14210	182.457	71.9775	1.3419	1.0544e-58	4.642e-59	AVR78_RS14210	uroporphyrinogen-III C-methyltransferase
AVR78_RS14245	193.515	68.2545	1.5035	1.8917e-65	1.0175e-65	AVR78_RS14245	NAD(P)H-binding protein
AVR78_RS14280	309.625	106.312	1.5422	8.2269e-105	9.3799e-105	AVR78_RS14280	glycerate kinase
AVR78_RS14350	121.638	49.226	1.3051	3.1059e-39	7.2119e-40	AVR78_RS14350	MFS transporter
AVR78_RS14360	165.87	45.9167	1.853	6.8483e-62	3.251e-62	AVR78_RS14360	methionine ABC transporter substrate-binding protein
AVR78_RS14365	171.399	39.7117	2.1097	1.5406e-67	8.6714e-68	AVR78_RS14365	ABC transporter permease
AVR78_RS14370	88.4641	29.7838	1.5706	1.806e-31	3.2337e-32	AVR78_RS14370	D- and L-methionine transporter ATP-binding protein
AVR78_RS14375	160.341	57.0856	1.4899	2.558e-54	9.8909e-55	AVR78_RS14375	FMN-dependent monooxygenase
AVR78_RS14395	187.986	66.5999	1.497	1.6524e-63	8.2868e-64	AVR78_RS14395	sigma-54-dependent Fis family transcriptional regulator
AVR78_RS14405	276.45	88.9377	1.6362	2.3529e-96	2.3959e-96	AVR78_RS14405	lactaldehyde reductase
AVR78_RS14410	93.9932	34.3341	1.4529	3.3723e-32	6.1751e-33	AVR78_RS14410	L-fuculose-phosphate aldolase
AVR78_RS14420	88.4641	42.1937	1.0681	1.3721e-26	2.1051e-27	AVR78_RS14420	MFS transporter
AVR78_RS14425	248.805	69.4955	1.84	1.2775e-91	1.1917e-91	AVR78_RS14425	L-fucose isomerase
AVR78_RS14430	82.9351	39.2981	1.0775	4.0162e-25	5.8425e-26	AVR78_RS14430	L-fuculokinase
AVR78_RS14485	11.058	5.37763	1.0401	0.00017635	1.1376e-05	AVR78_RS14485	tRNA-Met
AVR78_RS14495	33.1741	5.7913	2.5181	2.4838e-15	2.496e-16	AVR78_RS14495	tRNA-Met
AVR78_RS14500	165.87	71.9775	1.2044	5.4047e-51	1.8702e-51	AVR78_RS14500	nicotinate-nucleotide--dimethylbenzimidazole phosphoribosyltransferase
AVR78_RS14510	210.102	66.5999	1.6575	4.0803e-74	2.6747e-74	AVR78_RS14510	cobyric acid synthase
AVR78_RS14515	82.9351	40.5391	1.0327	1.1168e-24	1.5891e-25	AVR78_RS14515	energy-coupling factor ABC transporter ATP-binding protein
AVR78_RS14530	121.638	48.8123	1.3173	2.1344e-39	4.9996e-40	AVR78_RS14530	cobalt ECF transporter S component CbiM
AVR78_RS14535	33.1741	15.3056	1.116	4.096e-11	3.4891e-12	AVR78_RS14535	cobalt-factor II C(20)-methyltransferase
AVR78_RS14540	77.4061	28.9565	1.4186	1.5749e-26	2.4134e-27	AVR78_RS14540	sirohydrochlorin cobaltochelatase
AVR78_RS14545	60.8191	26.0608	1.2226	7.0727e-20	8.5383e-21	AVR78_RS14545	cobalt-precorrin-6A reductase
AVR78_RS14550	82.9351	30.1975	1.4576	1.1997e-28	1.9529e-29	AVR78_RS14550	cobalt-precorrin-3B C(17)-methyltransferase
AVR78_RS14555	82.9351	33.9204	1.2898	3.8034e-27	5.9515e-28	AVR78_RS14555	cobalt-precorrin 5A hydrolase
AVR78_RS14565	55.2901	11.9963	2.2044	2.4356e-23	3.3341e-24	AVR78_RS14565	decarboxylating cobalt-precorrin-6B (C(15))-methyltransferase
AVR78_RS14575	66.3481	32.2658	1.0401	4.0231e-20	4.9213e-21	cbiD	cobalt-precorrin-5B (C(1))-methyltransferase
AVR78_RS14585	110.58	41.3664	1.4186	3.5153e-37	7.5573e-38	AVR78_RS14585	cobalamin biosynthesis protein
AVR78_RS14600	270.921	91.8334	1.5608	1.8718e-92	1.7963e-92	AVR78_RS14600	propanediol diffusion facilitator PduF
AVR78_RS14610	38.7031	11.9963	1.6899	4.1072e-15	4.0949e-16	AVR78_RS14610	propanediol utilization microcompartment protein PduB
AVR78_RS14615	116.109	33.5068	1.793	3.0992e-43	8.2852e-44	pduC	propanediol dehydratase large subunit
AVR78_RS14620	77.4061	34.3341	1.1728	2.0278e-24	2.87e-25	pduD	propanediol dehydratase medium subunit PduD
AVR78_RS14630	88.4641	43.4347	1.0262	3.8004e-26	5.7414e-27	AVR78_RS14630	diol dehydratase reactivase subunit alpha
AVR78_RS14640	11.058	1.24099	3.1555	2.1911e-06	1.5396e-07	AVR78_RS14640	propanediol utilization microcompartment protein PduA
AVR78_RS14645	5.52901	1.65466	1.7405	0.0028094	0.00017089	AVR78_RS14645	BMC domain-containing protein
AVR78_RS14650	55.2901	14.8919	1.8925	5.9751e-22	7.7686e-23	AVR78_RS14650	phosphate propanoyltransferase
AVR78_RS14655	16.587	6.20496	1.4186	8.0445e-07	5.7913e-08	AVR78_RS14655	microcompartment protein PduM
AVR78_RS14660	5.52901	0	2.7405	0.0010401	6.4457e-05	AVR78_RS14660	ethanolamine utilization protein EutN
AVR78_RS14670	138.225	47.985	1.5264	1.3778e-47	4.2743e-48	AVR78_RS14670	aldehyde dehydrogenase EutE
AVR78_RS14675	38.7031	14.8919	1.3779	7.0935e-14	6.7565e-15	AVR78_RS14675	propanediol utilization: propanol dehydrogenase
AVR78_RS14680	71.8771	18.6149	1.9491	2.1382e-28	3.4553e-29	AVR78_RS14680	polyhedral body protein
AVR78_RS14685	33.1741	14.0646	1.238	1.3815e-11	1.2049e-12	AVR78_RS14685	BMC domain-containing protein
AVR78_RS14690	44.2321	14.8919	1.5706	1.5563e-16	1.6366e-17	AVR78_RS14690	propanediol utilization protein PduU
AVR78_RS14695	27.645	4.13664	2.7405	2.2486e-13	2.1027e-14	AVR78_RS14695	ethanolamine utilization protein EutP
AVR78_RS14825	182.457	68.2545	1.4186	3.3449e-60	1.5281e-60	AVR78_RS14825	hypothetical protein
AVR78_RS14845	210.102	80.6645	1.3811	3.2971e-68	1.8836e-68	AVR78_RS14845	glycoside hydrolase family 1 protein
AVR78_RS14850	215.631	105.071	1.0372	1.5075e-61	7.0934e-62	AVR78_RS14850	PTS sugar transporter subunit IIC
AVR78_RS14880	127.167	43.021	1.5636	2.1246e-44	5.9107e-45	AVR78_RS14880	sugar ABC transporter permease
AVR78_RS14885	60.8191	28.5428	1.0914	5.9918e-19	6.9807e-20	AVR78_RS14885	carbohydrate ABC transporter permease
AVR78_RS14890	165.87	38.0571	2.1238	1.3384e-65	7.2575e-66	AVR78_RS14890	ABC transporter ATP-binding protein
AVR78_RS14895	171.399	76.5278	1.1633	7.9311e-52	2.8326e-52	AVR78_RS14895	carbohydrate ABC transporter substrate-binding protein
AVR78_RS14905	248.805	88.9377	1.4842	3.9939e-83	3.1999e-83	AVR78_RS14905	glycosyl hydrolase family 32
AVR78_RS14910	154.812	46.3304	1.7405	2.6168e-56	1.061e-56	AVR78_RS14910	MFS transporter
AVR78_RS14930	99.5222	47.985	1.0524	1.6055e-29	2.7145e-30	AVR78_RS14930	2-deoxy-D-gluconate 3-dehydrogenase
AVR78_RS14935	22.116	5.7913	1.9331	9.3909e-10	7.5854e-11	AVR78_RS14935	hypothetical protein
AVR78_RS14940	165.87	54.6036	1.603	5.1033e-58	2.1855e-58	AVR78_RS14940	oligogalacturonide lyase
AVR78_RS14945	66.3481	31.0248	1.0966	1.4355e-20	1.778e-21	AVR78_RS14945	oligogalacturonate porin
AVR78_RS15020	248.805	67.4272	1.8836	1.4277e-92	1.3751e-92	AVR78_RS15020	EamA family transporter
AVR78_RS15025	116.109	55.431	1.0667	2.3346e-34	4.6413e-35	AVR78_RS15025	MarR family transcriptional regulator
AVR78_RS15045	60.8191	26.0608	1.2226	7.0727e-20	8.5383e-21	AVR78_RS15045	pili assembly chaperone protein
AVR78_RS15050	77.4061	27.7155	1.4818	4.8256e-27	7.5202e-28	AVR78_RS15050	fimbrial chaperone protein
AVR78_RS15065	66.3481	29.3701	1.1757	3.4978e-21	4.4248e-22	AVR78_RS15065	tyrosine recombinase
AVR78_RS15070	127.167	33.9204	1.9065	1.8357e-48	5.8936e-49	AVR78_RS15070	tyrosine recombinase
AVR78_RS15120	160.341	49.6397	1.6916	1.6135e-57	6.8004e-58	AVR78_RS15120	hypothetical protein
AVR78_RS15140	149.283	61.2223	1.2859	1.9441e-47	5.9824e-48	AVR78_RS15140	multidrug resistance transporter
AVR78_RS15190	44.2321	10.3416	2.0966	1.2623e-18	1.4573e-19	AVR78_RS15190	hypothetical protein
AVR78_RS15195	27.645	11.9963	1.2044	8.6923e-10	7.036e-11	AVR78_RS15195	flavodoxin family protein
AVR78_RS15200	105.051	47.1577	1.1555	2.43e-32	4.4743e-33	AVR78_RS15200	aldo/keto reductase
AVR78_RS15205	116.109	43.021	1.4324	4.0137e-39	9.2426e-40	AVR78_RS15205	carboxymuconolactone decarboxylase
AVR78_RS15315	82.9351	39.2981	1.0775	4.0162e-25	5.8425e-26	AVR78_RS15315	protein disulfide oxidoreductase
AVR78_RS15440	11.058	3.72298	1.5706	3.6911e-05	2.4705e-06	AVR78_RS15440	IS5/IS1182 family transposase
AVR78_RS15445	160.341	60.3949	1.4086	5.9067e-53	2.201e-53	AVR78_RS15445	outer membrane porin%2C OprD family
AVR78_RS15450	221.16	88.5241	1.321	2.9174e-70	1.7374e-70	AVR78_RS15450	hypothetical protein
AVR78_RS15465	66.3481	17.7875	1.8992	4.6912e-26	7.0791e-27	AVR78_RS15465	short chain dehydrogenase
AVR78_RS15470	71.8771	21.5105	1.7405	4.6134e-27	7.2021e-28	AVR78_RS15470	alpha/beta hydrolase
AVR78_RS15475	27.645	13.6509	1.018	3.5879e-09	2.8371e-10	AVR78_RS15475	cupin domain-containing protein
AVR78_RS15480	121.638	40.5391	1.5852	8.3074e-43	2.1858e-43	AVR78_RS15480	MFS transporter
AVR78_RS15485	143.754	62.8769	1.193	3.0456e-44	8.4027e-45	AVR78_RS15485	ferredoxin reductase
AVR78_RS15515	38.7031	10.3416	1.904	7.1516e-16	7.3385e-17	AVR78_RS15515	non-heme iron oxygenase ferredoxin subunit
AVR78_RS15520	215.631	58.3266	1.8863	1.5634e-80	1.1717e-80	AVR78_RS15520	MFS transporter
AVR78_RS15595	182.457	51.2943	1.8307	1.5501e-67	8.7066e-68	AVR78_RS15595	type IV pili twitching motility protein PilT
AVR78_RS15635	116.109	54.19	1.0994	8.319e-35	1.6688e-35	AVR78_RS15635	TRAP transporter permease DctM
AVR78_RS15670	138.225	47.985	1.5264	1.3778e-47	4.2743e-48	AVR78_RS15670	nucleoside permease
AVR78_RS15680	55.2901	10.3416	2.4186	3.6697e-24	5.1448e-25	AVR78_RS15680	hypothetical protein
AVR78_RS15690	5.52901	1.24099	2.1555	0.0017315	0.00010632	AVR78_RS15690	tRNA-Phe
AVR78_RS15695	60.8191	26.8882	1.1776	1.4594e-19	1.7383e-20	AVR78_RS15695	hypothetical protein
AVR78_RS15705	88.4641	33.0931	1.4186	4.4034e-30	7.594e-31	AVR78_RS15705	PLP-dependent transferase
AVR78_RS15715	44.2321	17.3739	1.3482	1.6895e-15	1.7106e-16	AVR78_RS15715	short chain dehydrogenase
AVR78_RS15845	132.696	55.8446	1.2486	8.2533e-42	2.0971e-42	AVR78_RS15845	two-component system sensor histidine kinase QseC
AVR78_RS15975	105.051	37.6434	1.4806	4.3269e-36	9.0259e-37	AVR78_RS15975	hypothetical protein
AVR78_RS15995	160.341	61.6359	1.3793	1.8772e-52	6.8795e-53	AVR78_RS15995	urease subunit alpha
AVR78_RS16015	204.573	75.7005	1.4342	1.2906e-67	7.3107e-68	AVR78_RS16015	cytosine/purines uracil thiamine allantoin permease
AVR78_RS16050	55.2901	11.5826	2.2551	1.5227e-23	2.0962e-24	AVR78_RS16050	tRNA-Met
AVR78_RS16065	88.4641	23.9925	1.8825	4.6758e-34	9.2133e-35	AVR78_RS16065	hypothetical protein
AVR78_RS16070	160.341	69.9092	1.1976	3.1495e-49	1.031e-49	AVR78_RS16070	hypothetical protein
AVR78_RS16080	414.676	195.663	1.0836	6.5698e-119	9.1769e-119	AVR78_RS16080	sensor protein EvgS
AVR78_RS16085	138.225	62.4633	1.1459	7.3548e-42	1.8741e-42	AVR78_RS16085	hypothetical protein
AVR78_RS16090	49.7611	16.5466	1.5885	1.6954e-18	1.9397e-19	AVR78_RS16090	acid-resistance membrane protein
AVR78_RS16095	27.645	10.7553	1.362	2.7958e-10	2.3058e-11	AVR78_RS16095	acid-resistance protein
AVR78_RS16100	5.52901	2.06832	1.4186	0.0043884	0.00026376	AVR78_RS16100	cobalamin adenosyltransferase
AVR78_RS16140	204.573	76.1142	1.4264	1.9057e-67	1.0681e-67	AVR78_RS16140	glycerone kinase
AVR78_RS16170	77.4061	34.3341	1.1728	2.0278e-24	2.87e-25	AVR78_RS16170	autoinducer 2-degrading protein LsrG
AVR78_RS16180	193.515	50.8807	1.9273	3.8164e-73	2.4476e-73	AVR78_RS16180	autoinducer 2 ABC transporter substrate-binding protein LsrB
AVR78_RS16185	77.4061	24.4062	1.6652	1.8287e-28	2.9623e-29	AVR78_RS16185	ABC transporter permease
AVR78_RS16190	116.109	53.7763	1.1104	5.8797e-35	1.1839e-35	AVR78_RS16190	autoinducer 2 ABC transporter permease LsrC
AVR78_RS16250	88.4641	40.1254	1.1406	2.4132e-27	3.7939e-28	AVR78_RS16250	YgjV family protein
AVR78_RS16305	60.8191	28.5428	1.0914	5.9918e-19	6.9807e-20	AVR78_RS16305	DoxX family protein
AVR78_RS16385	105.051	52.1217	1.0111	1.5089e-30	2.6467e-31	AVR78_RS16385	1-phosphofructokinase
AVR78_RS16390	110.58	50.0533	1.1436	8.4308e-34	1.6502e-34	AVR78_RS16390	PTS fructose subfamily%2C IIC subunit
AVR78_RS16400	66.3481	28.5428	1.2169	1.698e-21	2.1728e-22	AVR78_RS16400	tagatose-bisphosphate aldolase subunit GatZ
AVR78_RS16410	5.52901	2.06832	1.4186	0.0043884	0.00026376	AVR78_RS16410	PTS galactitol transporter subunit IIB
AVR78_RS16415	160.341	74.4595	1.1066	1.5284e-47	4.7142e-48	AVR78_RS16415	PTS galactitol transporter subunit IIC
AVR78_RS16420	88.4641	21.9242	2.0126	4.9803e-35	1.0074e-35	AVR78_RS16420	galactitol-1-phosphate 5-dehydrogenase
AVR78_RS16580	138.225	38.0571	1.8608	5.6813e-52	2.0428e-52	AVR78_RS16580	outer membrane protein
AVR78_RS16665	105.051	26.8882	1.966	7.1775e-41	1.7731e-41	AVR78_RS16665	regulatory factor of maltose metabolism
AVR78_RS16775	392.56	135.682	1.5327	5.4961e-132	8.7281e-132	AVR78_RS16775	mannonate dehydratase
AVR78_RS16780	187.986	48.3987	1.9576	1.3706e-71	8.5356e-72	AVR78_RS16780	Zn-dependent oxidoreductase
AVR78_RS16785	270.921	126.168	1.1025	5.9941e-79	4.3575e-79	AVR78_RS16785	MFS transporter
AVR78_RS16790	215.631	100.934	1.0952	5.0037e-63	2.4721e-63	AVR78_RS16790	TIGR01212 family radical SAM protein
AVR78_RS16810	121.638	54.19	1.1665	2.4741e-37	5.3666e-38	AVR78_RS16810	YhcH/YjgK/YiaL family protein
AVR78_RS16815	77.4061	35.5751	1.1216	5.8647e-24	8.1749e-25	AVR78_RS16815	N-acetylmannosamine kinase
AVR78_RS16825	414.676	162.57	1.3509	1.9927e-131	3.1272e-131	AVR78_RS16825	MFS transporter
AVR78_RS16830	237.747	93.9017	1.3402	6.8499e-76	4.5918e-76	AVR78_RS16830	N-acetylneuraminate lyase
AVR78_RS16850	82.9351	20.6832	2.0035	6.9517e-33	1.3135e-33	AVR78_RS16850	hypothetical protein
AVR78_RS16905	138.225	65.7726	1.0715	1.1823e-40	2.8781e-41	AVR78_RS16905	barnase inhibitor
AVR78_RS16975	44.2321	21.9242	1.0126	8.8625e-14	8.4055e-15	AVR78_RS16975	hypothetical protein
AVR78_RS17035	143.754	54.19	1.4075	1.2099e-47	3.7754e-48	AVR78_RS17035	acrEF/envCD operon transcriptional regulator
AVR78_RS17045	315.154	114.171	1.4649	3.7273e-104	4.2316e-104	AVR78_RS17045	multidrug efflux RND transporter permease subunit
AVR78_RS17050	38.7031	16.1329	1.2624	2.2221e-13	2.0802e-14	AVR78_RS17050	membrane protein
AVR78_RS17055	16.587	5.37763	1.625	3.5129e-07	2.5804e-08	rrf	5S ribosomal RNA
AVR78_RS17140	210.102	49.226	2.0936	4.1816e-82	3.2337e-82	AVR78_RS17140	ribosome alternative rescue factor ArfA
AVR78_RS17295	154.812	52.5353	1.5592	1.3487e-53	5.0894e-54	AVR78_RS17295	prepilin peptidase
AVR78_RS17385	66.3481	26.0608	1.3482	1.8126e-22	2.3987e-23	AVR78_RS17385	hypothetical protein
AVR78_RS17410	33.1741	15.3056	1.116	4.096e-11	3.4891e-12	AVR78_RS17410	hypothetical protein
AVR78_RS17460	226.689	98.8657	1.1972	7.7048e-69	4.459e-69	AVR78_RS17460	nitrite reductase large subunit
AVR78_RS17465	16.587	6.20496	1.4186	8.0445e-07	5.7913e-08	AVR78_RS17465	nitrite reductase small subunit NirD
AVR78_RS17515	215.631	68.2545	1.6596	4.6391e-76	3.1413e-76	AVR78_RS17515	DNA transporter HofQ
AVR78_RS17520	38.7031	9.10061	2.0884	1.8235e-16	1.9116e-17	AVR78_RS17520	DUF2531 domain-containing protein
AVR78_RS17530	16.587	7.03229	1.238	1.7538e-06	1.2388e-07	AVR78_RS17530	hypothetical protein
AVR78_RS17635	176.928	63.2906	1.4831	1.2603e-59	5.6895e-60	AVR78_RS17635	gluconate transporter
AVR78_RS17705	110.58	41.3664	1.4186	3.5153e-37	7.5573e-38	AVR78_RS17705	hypothetical protein
AVR78_RS17710	176.928	67.8409	1.3829	9.215e-58	3.9148e-58	AVR78_RS17710	gluconate transporter
AVR78_RS17735	116.109	36.8161	1.6571	9.313e-42	2.3618e-42	AVR78_RS17735	hypothetical protein
AVR78_RS17740	60.8191	26.0608	1.2226	7.0727e-20	8.5383e-21	AVR78_RS17740	hypothetical protein
AVR78_RS17765	193.515	86.4558	1.1624	2.9092e-58	1.2641e-58	ugpC	sn-glycerol-3-phosphate import ATP-binding protein UgpC
AVR78_RS17770	55.2901	11.9963	2.2044	2.4356e-23	3.3341e-24	AVR78_RS17770	sn-glycerol-3-phosphate ABC transporter permease UgpE
AVR78_RS17785	121.638	36.4024	1.7405	1.2666e-44	3.5532e-45	livF	high-affinity branched-chain amino acid ABC transporter ATP-binding protein LivF
AVR78_RS17790	49.7611	19.4422	1.3558	2.7566e-17	3.0142e-18	livG	ABC transporter ATP-binding protein
AVR78_RS17800	82.9351	26.8882	1.625	4.6953e-30	8.0818e-31	AVR78_RS17800	high-affinity branched-chain amino acid ABC transporter permease LivH
AVR78_RS17805	221.16	92.2471	1.2615	8.2589e-69	4.7693e-69	AVR78_RS17805	high-affinity branched-chain amino acid ABC transporter substrate-binding protein LivK
AVR78_RS17815	71.8771	16.5466	2.119	2.1913e-29	3.6839e-30	AVR78_RS17815	DUF4753 domain-containing protein
AVR78_RS17830	210.102	78.5961	1.4186	4.7907e-69	2.7846e-69	AVR78_RS17830	tyrosine-specific transporter
AVR78_RS17835	171.399	79.4235	1.1097	9.2364e-51	3.1674e-51	AVR78_RS17835	4-aminobutyrate--2-oxoglutarate transaminase
AVR78_RS17840	215.631	97.211	1.1494	2.175e-64	1.1334e-64	AVR78_RS17840	PLP-dependent aminotransferase family protein
AVR78_RS17935	248.805	122.031	1.0278	1.8698e-70	1.1185e-70	AVR78_RS17935	bifunctional UDP-4-amino-4-deoxy-L-arabinose formyltransferase/UDP-glucuronic acid oxidase ArnA
AVR78_RS17970	138.225	45.503	1.603	1.1994e-48	3.8648e-49	AVR78_RS17970	nickel ABC transporter permease subunit NikC
AVR78_RS17975	38.7031	17.3739	1.1555	6.6555e-13	6.0956e-14	AVR78_RS17975	nickel import ATP-binding protein NikD
AVR78_RS17980	66.3481	18.2012	1.866	7.3067e-26	1.0933e-26	AVR78_RS17980	nickel import ATP-binding protein NikE
AVR78_RS17995	5.52901	2.48198	1.1555	0.0066046	0.00039236	AVR78_RS17995	IS110 family transposase
AVR78_RS18005	116.109	53.7763	1.1104	5.8797e-35	1.1839e-35	AVR78_RS18005	magnesium transporter
AVR78_RS18010	143.754	60.8086	1.2413	4.9816e-45	1.4154e-45	AVR78_RS18010	LysR family transcriptional regulator
AVR78_RS18015	127.167	61.2223	1.0546	2.7651e-37	5.9734e-38	AVR78_RS18015	hydroxyacid dehydrogenase
AVR78_RS18025	88.4641	36.8161	1.2648	1.3425e-28	2.1814e-29	AVR78_RS18025	anion transporter
AVR78_RS18075	204.573	76.5278	1.4186	2.8112e-67	1.5658e-67	AVR78_RS18075	phosphatase PAP2 family protein
AVR78_RS18110	237.747	94.3154	1.3339	9.9914e-76	6.6808e-76	AVR78_RS18110	oxidoreductase
AVR78_RS18200	11.058	0	4.467	1.3855e-06	9.8728e-08	AVR78_RS18200	cellulose biosynthesis protein BcsF
AVR78_RS18220	525.256	232.893	1.1734	1.4486e-155	2.8629e-155	AVR78_RS18220	cellulose synthase
AVR78_RS18225	176.928	80.6645	1.1332	7.9826e-53	2.9498e-53	AVR78_RS18225	cellulose biosynthesis cyclic di-GMP-binding regulatory protein BcsB
AVR78_RS18275	38.7031	15.7192	1.2999	1.5264e-13	1.4344e-14	AVR78_RS18275	hypothetical protein
AVR78_RS18280	88.4641	33.0931	1.4186	4.4034e-30	7.594e-31	AVR78_RS18280	hypothetical protein
AVR78_RS18295	232.218	104.243	1.1555	2.2957e-69	1.3432e-69	AVR78_RS18295	hypothetical protein
AVR78_RS18305	121.638	52.1217	1.2226	4.1033e-38	9.085e-39	AVR78_RS18305	oxalate/formate antiport family MFS transporter
AVR78_RS18315	248.805	118.722	1.0674	1.2538e-71	7.8338e-72	AVR78_RS18315	DNA-3-methyladenine glycosylase I
AVR78_RS18365	176.928	66.1862	1.4186	1.9665e-58	8.6009e-59	AVR78_RS18365	aromatic acid/H+ symport family MFS transporter
AVR78_RS18380	359.386	121.204	1.5681	2.8216e-122	4.1362e-122	AVR78_RS18380	ABC transporter ATP-binding protein
AVR78_RS18385	105.051	39.7117	1.4035	3.0775e-35	6.2629e-36	AVR78_RS18385	type I toxin-antitoxin system hok family toxin
AVR78_RS18410	149.283	40.1254	1.8955	1.9447e-56	7.9092e-57	AVR78_RS18410	hypothetical protein
AVR78_RS18415	226.689	105.484	1.1037	2.1588e-66	1.1851e-66	AVR78_RS18415	xylulokinase
AVR78_RS18425	60.8191	22.7515	1.4186	3.4352e-21	4.3538e-22	AVR78_RS18425	hypothetical protein
AVR78_RS18435	143.754	62.8769	1.193	3.0456e-44	8.4027e-45	AVR78_RS18435	xylose ABC transporter ATP-binding protein
AVR78_RS18440	110.58	42.6074	1.3759	1.121e-36	2.3793e-37	AVR78_RS18440	sugar ABC transporter permease
AVR78_RS18460	342.799	127.408	1.4279	8.4742e-112	1.0922e-111	AVR78_RS18460	alpha-amylase
AVR78_RS18510	143.754	45.503	1.6596	2.5816e-51	9.0034e-52	AVR78_RS18510	DUF3302 domain-containing protein
AVR78_RS18550	121.638	49.6397	1.293	4.5123e-39	1.036e-39	lldD	alpha-hydroxy-acid oxidizing protein
AVR78_RS18730	11.058	3.30931	1.7405	2.3844e-05	1.6097e-06	AVR78_RS18730	hypothetical protein
AVR78_RS18740	453.379	155.538	1.5435	1.2751e-152	2.4474e-152	AVR78_RS18740	hypothetical protein
AVR78_RS18750	409.147	136.923	1.5793	2.179e-139	3.7266e-139	AVR78_RS18750	NAD-dependent DNA ligase LigB
AVR78_RS18790	226.689	110.862	1.032	1.8103e-64	9.4887e-65	AVR78_RS18790	DUF805 domain-containing protein
AVR78_RS18870	265.392	95.1427	1.48	1.9968e-88	1.7817e-88	AVR78_RS18870	alpha-xylosidase
AVR78_RS18875	71.8771	29.3701	1.2912	9.3621e-24	1.2955e-24	AVR78_RS18875	glycoside-pentoside-hexuronide family transporter
AVR78_RS18880	38.7031	18.2012	1.0884	1.3502e-12	1.2224e-13	AVR78_RS18880	tRNA-Sec
AVR78_RS18905	210.102	76.5278	1.457	6.7941e-70	4.0014e-70	AVR78_RS18905	AraC family transcriptional regulator
AVR78_RS18935	60.8191	21.5105	1.4995	1.0463e-21	1.3466e-22	AVR78_RS18935	macrophage infectivity potentiator-like protein
AVR78_RS18940	66.3481	29.7838	1.1555	4.999e-21	6.2911e-22	AVR78_RS18940	DUF1348 domain-containing protein
AVR78_RS18995	298.566	88.1104	1.7607	2.0204e-107	2.4501e-107	AVR78_RS18995	multidrug efflux RND transporter permease subunit
AVR78_RS19000	154.812	39.7117	1.9629	2.3865e-59	1.0737e-59	AVR78_RS19000	RND transporter NodT
AVR78_RS19005	60.8191	18.6149	1.7081	5.7894e-23	7.8247e-24	AVR78_RS19005	Bcr/CflA family drug resistance efflux transporter
AVR78_RS19030	320.683	89.3514	1.8436	1.2424e-117	1.6998e-117	AVR78_RS19030	NAD(P)-dependent oxidoreductase
AVR78_RS19035	82.9351	39.2981	1.0775	4.0162e-25	5.8425e-26	AVR78_RS19035	4-oxalomesaconate tautomerase
AVR78_RS19055	226.689	92.2471	1.2971	2.225e-71	1.3741e-71	AVR78_RS19055	protocatechuate 4%2C5-dioxygenase
AVR78_RS19070	49.7611	21.5105	1.21	1.79e-16	1.8772e-17	AVR78_RS19070	PTS sugar transporter subunit IIB
AVR78_RS19080	66.3481	23.9925	1.4675	2.5872e-23	3.5326e-24	AVR78_RS19080	PTS lactose/cellobiose transporter subunit IIA
AVR78_RS19085	11.058	0	4.7405	1.4837e-06	1.0534e-07	AVR78_RS19085	carbohydrate porin
AVR78_RS19095	171.399	48.3987	1.8243	1.8601e-63	9.3108e-64	AVR78_RS19095	2-aminoethylphosphonate ABC transport system%2C membrane component PhnV
AVR78_RS19100	38.7031	17.3739	1.1555	6.6555e-13	6.0956e-14	AVR78_RS19100	2-aminoethylphosphonate ABC transporter permease subunit
AVR78_RS19105	82.9351	31.8521	1.3806	5.7116e-28	9.1357e-29	AVR78_RS19105	2-aminoethylphosphonate ABC transport system ATP-binding subunit PhnT
AVR78_RS19120	5.52901	2.06832	1.4186	0.0043884	0.00026376	AVR78_RS19120	hypothetical protein
AVR78_RS19125	127.167	51.708	1.2983	7.646e-41	1.8853e-41	AVR78_RS19125	2-aminoethylphosphonate--pyruvate transaminase
AVR78_RS19130	93.9932	27.3018	1.7836	3.0083e-35	6.1313e-36	AVR78_RS19130	phosphonoacetaldehyde hydrolase
AVR78_RS19155	116.109	39.2981	1.563	1.1068e-40	2.7041e-41	AVR78_RS19155	hexose-6-phosphate:phosphate antiporter
AVR78_RS19165	182.457	69.4955	1.3926	1.0672e-59	4.834e-60	AVR78_RS19165	signal transduction histidine-protein kinase/phosphatase UhpB
AVR78_RS19230	160.341	62.8769	1.3505	5.8989e-52	2.1153e-52	AVR78_RS19230	D-serine transporter DsdX
AVR78_RS19255	171.399	71.9775	1.2517	1.5044e-53	5.6691e-54	AVR78_RS19255	6-phospho-alpha-glucosidase
AVR78_RS19265	226.689	113.344	1	1.3382e-63	6.7875e-64	AVR78_RS19265	GntR family transcriptional regulator
AVR78_RS19400	270.921	133.2	1.0243	1.9369e-76	1.3284e-76	AVR78_RS19400	carbohydrate porin
AVR78_RS19405	27.645	8.68694	1.6701	3.6467e-11	3.1153e-12	AVR78_RS19405	hypothetical protein
AVR78_RS19530	248.805	113.344	1.1343	1.4093e-73	9.1482e-74	AVR78_RS19530	ATPase RavA stimulator ViaA
AVR78_RS19610	11.058	4.96397	1.1555	0.00012242	7.9606e-06	rrf	5S ribosomal RNA
AVR78_RS19650	27.645	10.7553	1.362	2.7958e-10	2.3058e-11	AVR78_RS19650	hypothetical protein
AVR78_RS19695	60.8191	13.6509	2.1555	2.7404e-25	4.0238e-26	AVR78_RS19695	hypothetical protein
AVR78_RS19770	254.334	93.488	1.4439	7.2449e-84	5.9292e-84	AVR78_RS19770	phosphofructokinase
AVR78_RS19775	11.058	2.48198	2.1555	9.4035e-06	6.4577e-07	AVR78_RS19775	sugar phosphotransferase component II B
AVR78_RS19780	215.631	89.7651	1.2643	3.3361e-67	1.8504e-67	AVR78_RS19780	PTS beta-glucoside transporter subunit IIBC
AVR78_RS19805	44.2321	16.5466	1.4186	7.773e-16	7.9578e-17	AVR78_RS19805	AzlD domain-containing protein
AVR78_RS19830	171.399	80.6645	1.0874	2.6035e-50	8.8147e-51	lacY	MFS transporter
AVR78_RS19845	66.3481	32.2658	1.0401	4.0231e-20	4.9213e-21	AVR78_RS19845	lactaldehyde reductase
AVR78_RS19850	116.109	57.913	1.0035	1.7653e-33	3.4177e-34	AVR78_RS19850	ABC transporter permease
AVR78_RS19855	66.3481	25.6472	1.3713	1.2355e-22	1.6498e-23	AVR78_RS19855	ABC transporter permease
AVR78_RS19860	143.754	67.0136	1.1011	1.0331e-42	2.7129e-43	AVR78_RS19860	sugar ABC transporter ATP-binding protein
AVR78_RS19865	99.5222	46.744	1.0902	5.7431e-30	9.8536e-31	AVR78_RS19865	rhamnose ABC transporter substrate-binding protein
AVR78_RS19870	71.8771	33.0931	1.119	2.4336e-22	3.2047e-23	AVR78_RS19870	rhamnulose-1-phosphate aldolase
AVR78_RS19880	116.109	51.708	1.167	1.0129e-35	2.0853e-36	AVR78_RS19880	rhamnulokinase
AVR78_RS19890	243.276	97.6247	1.3173	5.2771e-77	3.676e-77	AVR78_RS19890	HTH-type transcriptional activator RhaS
AVR78_RS20000	66.3481	26.8882	1.3031	3.8661e-22	5.0587e-23	AVR78_RS20000	carboxymuconolactone decarboxylase
AVR78_RS20045	232.218	99.693	1.2199	4.5045e-71	2.7501e-71	AVR78_RS20045	N-acetyl-gamma-glutamyl-phosphate reductase
AVR78_RS20095	552.901	239.925	1.2044	1.317e-165	2.811e-165	AVR78_RS20095	TonB-dependent vitamin B12 receptor BtuB
AVR78_RS20150	171.399	67.0136	1.3548	1.7047e-55	6.7883e-56	AVR78_RS20150	ATP-dependent protease
AVR78_RS20220	55.2901	14.8919	1.8925	5.9751e-22	7.7686e-23	AVR78_RS20220	addiction module toxin RelE
AVR78_RS20310	5.52901	0	3.7405	0.0006674	4.1749e-05	AVR78_RS20310	tRNA-Arg
AVR78_RS20455	199.044	87.2831	1.1893	1.7257e-60	7.9243e-61	AVR78_RS20455	EamA family transporter
AVR78_RS20465	409.147	184.494	1.149	1.8138e-120	2.6017e-120	AVR78_RS20465	5-methyltetrahydropteroyltriglutamate--homocysteine S-methyltransferase
AVR78_RS20600	22.116	3.72298	2.5706	8.7857e-11	7.3757e-12	rrf	5S ribosomal RNA
AVR78_RS20620	38.7031	11.5826	1.7405	2.675e-15	2.684e-16	AVR78_RS20620	tRNA-Thr
AVR78_RS20720	127.167	45.9167	1.4696	3.5232e-43	9.4092e-44	AVR78_RS20720	2-iminoacetate synthase ThiH
AVR78_RS20725	38.7031	14.4782	1.4186	4.7982e-14	4.6015e-15	AVR78_RS20725	thiazole synthase
AVR78_RS20740	55.2901	8.27328	2.7405	3.3721e-25	4.9243e-26	AVR78_RS20740	thiamine phosphate synthase
AVR78_RS20785	127.167	40.1254	1.6641	1.1814e-45	3.4185e-46	zraP	zinc resistance-associated protein ZraP
AVR78_RS20905	77.4061	32.2658	1.2624	3.2913e-25	4.8089e-26	AVR78_RS20905	bile acid:sodium symporter
AVR78_RS20925	71.8771	31.0248	1.2121	4.0887e-23	5.557e-24	AVR78_RS20925	hypothetical protein
AVR78_RS20935	49.7611	16.5466	1.5885	1.6954e-18	1.9397e-19	AVR78_RS20935	hypothetical protein
AVR78_RS20960	11.058	3.72298	1.5706	3.6911e-05	2.4705e-06	AVR78_RS20960	AzlD domain-containing protein
AVR78_RS20970	154.812	48.3987	1.6775	2.1713e-55	8.5948e-56	AVR78_RS20970	serine dehydratase subunit alpha family protein
AVR78_RS20975	143.754	53.7763	1.4186	8.2075e-48	2.5853e-48	AVR78_RS20975	phosphate-starvation-inducible protein PsiE
AVR78_RS20985	60.8191	25.2335	1.2692	3.385e-20	4.1503e-21	AVR78_RS20985	L-asparaginase
AVR78_RS21000	82.9351	28.1291	1.5599	1.6132e-29	2.7258e-30	AVR78_RS21000	chemotaxis protein CheW
AVR78_RS21130	243.276	96.3837	1.3357	1.7077e-77	1.215e-77	AVR78_RS21130	lytic transglycosylase F
AVR78_RS21140	508.669	227.515	1.1608	5.5686e-150	1.0389e-149	AVR78_RS21140	TonB-dependent siderophore receptor
AVR78_RS21145	49.7611	15.3056	1.701	4.8174e-19	5.6396e-20	AVR78_RS21145	AraC family transcriptional regulator
AVR78_RS21150	193.515	95.1427	1.0243	4.0213e-55	1.5754e-55	AVR78_RS21150	tannase/feruloyl esterase family alpha/beta hydrolase
AVR78_RS21165	530.785	201.454	1.3977	2.4814e-170	5.5633e-170	AVR78_RS21165	outer membrane protein assembly factor BamA
AVR78_RS21170	22.116	9.10061	1.2811	2.6456e-08	2.0324e-09	AVR78_RS21170	coproporphyrinogen III oxidase
AVR78_RS21180	132.696	48.3987	1.4551	8.8483e-45	2.4876e-45	AVR78_RS21180	inositol monophosphatase
AVR78_RS21185	55.2901	15.7192	1.8145	1.4436e-21	1.8516e-22	AVR78_RS21185	LacI family transcriptional regulator
AVR78_RS21190	49.7611	18.2012	1.451	8.5532e-18	9.5559e-19	AVR78_RS21190	ribonuclease Z
AVR78_RS21195	143.754	56.672	1.3429	1.2055e-46	3.6056e-47	AVR78_RS21195	ABC transporter ATP-binding protein
AVR78_RS21200	265.392	68.2545	1.9591	2.5241e-100	2.7154e-100	AVR78_RS21200	ABC transporter substrate-binding protein
AVR78_RS21205	77.4061	22.7515	1.7665	3.3335e-29	5.5724e-30	AVR78_RS21205	ABC transporter permease
AVR78_RS21210	221.16	93.488	1.2422	2.4777e-68	1.4216e-68	AVR78_RS21210	ABC transporter permease
AVR78_RS21225	110.58	44.262	1.321	5.1299e-36	1.0651e-36	AVR78_RS21225	DNA-binding transcriptional regulator SoxS
AVR78_RS21280	232.218	109.207	1.0884	1.4995e-67	8.4579e-68	AVR78_RS21280	fimbrial biogenesis outer membrane usher protein
AVR78_RS21285	82.9351	24.4062	1.7647	3.7117e-31	6.5929e-32	AVR78_RS21285	fimbrial morphology protein
AVR78_RS21290	315.154	123.686	1.3494	2.6858e-100	2.8778e-100	AVR78_RS21290	major fimbrial protein SthE
AVR78_RS21295	154.812	69.4955	1.1555	7.62e-47	2.2972e-47	AVR78_RS21295	cation/acetate symporter ActP
AVR78_RS21300	55.2901	16.9602	1.7049	5.2683e-21	6.6175e-22	AVR78_RS21300	DUF485 domain-containing protein
AVR78_RS21305	71.8771	19.4422	1.8863	5.2176e-28	8.3506e-29	AVR78_RS21305	methionyl-tRNA formyltransferase
AVR78_RS21315	176.928	33.5068	2.4006	2.495e-73	1.6078e-73	AVR78_RS21315	hypothetical protein
AVR78_RS21365	110.58	52.1217	1.0851	4.8138e-33	9.154e-34	AVR78_RS21365	sugar ABC transporter ATP-binding protein
AVR78_RS21370	298.566	136.509	1.1291	9.7783e-88	8.6099e-88	AVR78_RS21370	hybrid sensor histidine kinase/response regulator
AVR78_RS21400	44.2321	21.9242	1.0126	8.8625e-14	8.4055e-15	AVR78_RS21400	phosphonate C-P lyase system protein PhnK
AVR78_RS21410	55.2901	25.2335	1.1317	1.2471e-17	1.3817e-18	AVR78_RS21410	carbon-phosphorus lyase complex subunit PhnI
AVR78_RS21415	44.2321	14.8919	1.5706	1.5563e-16	1.6366e-17	AVR78_RS21415	phosphonate C-P lyase system protein PhnH
AVR78_RS21420	16.587	2.48198	2.7405	1.3454e-08	1.0428e-09	AVR78_RS21420	phosphonate C-P lyase system protein PhnG
AVR78_RS21425	60.8191	6.20496	3.293	6.3341e-29	1.0464e-29	AVR78_RS21425	phosphonate metabolism transcriptional regulator PhnF
AVR78_RS21440	66.3481	15.3056	2.116	3.0847e-27	4.8411e-28	AVR78_RS21440	hypothetical protein
AVR78_RS21450	232.218	87.2831	1.4117	5.9716e-76	4.0232e-76	AVR78_RS21450	transcriptional regulator MelR
AVR78_RS21455	210.102	67.8409	1.6309	1.4194e-73	9.1916e-74	AVR78_RS21455	alpha-glucosidase/alpha-galactosidase
AVR78_RS21500	110.58	27.3018	2.018	2.0996e-43	5.641e-44	AVR78_RS21500	poly-beta-1%2C6-N-acetyl-D-glucosamine biosynthesis protein PgaD
AVR78_RS21505	127.167	58.3266	1.1245	2.4772e-38	5.5305e-39	AVR78_RS21505	poly-beta-1%2C6 N-acetyl-D-glucosamine synthase
AVR78_RS21510	138.225	60.3949	1.1945	1.2419e-42	3.2547e-43	pgaB	poly-beta-1%2C6-N-acetyl-D-glucosamine N-deacetylase PgaB
AVR78_RS21515	193.515	53.7763	1.8474	8.3598e-72	5.2479e-72	AVR78_RS21515	poly-beta-1%2C6 N-acetyl-D-glucosamine export porin PgaA
AVR78_RS21520	199.044	77.3552	1.3635	2.4382e-64	1.2681e-64	AVR78_RS21520	LuxR family transcriptional regulator
AVR78_RS21575	22.116	9.51427	1.2169	3.8526e-08	2.9443e-09	AVR78_RS21575	hypothetical protein
AVR78_RS21610	110.58	54.19	1.029	2.6403e-32	4.8447e-33	AVR78_RS21610	hypothetical protein
AVR78_RS21625	55.2901	19.0285	1.5389	4.2203e-20	5.1578e-21	AVR78_RS21625	hypothetical protein
AVR78_RS21645	88.4641	19.8559	2.1555	5.0239e-36	1.0439e-36	AVR78_RS21645	type 1 fimbrial protein
AVR78_RS21650	237.747	105.071	1.1781	1.3725e-71	8.5356e-72	AVR78_RS21650	transcriptional regulator
AVR78_RS21740	22.116	10.7553	1.0401	1.1311e-07	8.4842e-09	AVR78_RS21740	hypothetical protein
AVR78_RS21870	265.392	73.6322	1.8497	7.911e-98	8.2446e-98	AVR78_RS21870	L-ascorbate 6-phosphate lactonase
AVR78_RS21875	237.747	63.7042	1.9	7.0469e-89	6.3732e-89	AVR78_RS21875	PTS ascorbate transporter subunit IIC
AVR78_RS21885	38.7031	10.7553	1.8474	1.1162e-15	1.1366e-16	AVR78_RS21885	PTS ascorbate transporter subunit IIA
AVR78_RS21890	38.7031	18.2012	1.0884	1.3502e-12	1.2224e-13	ulaD	3-dehydro-L-gulonate-6-phosphate decarboxylase UlaD
AVR78_RS21895	82.9351	22.3379	1.8925	4.175e-32	7.624e-33	AVR78_RS21895	L-xylulose 5-phosphate 3-epimerase
AVR78_RS21900	99.5222	33.9204	1.5529	5.1436e-35	1.0396e-35	araD	L-ribulose-5-phosphate 4-epimerase
AVR78_RS21950	60.8191	26.8882	1.1776	1.4594e-19	1.7383e-20	AVR78_RS21950	iron-sulfur cluster repair protein YtfE
AVR78_RS21955	154.812	60.3949	1.358	2.3744e-50	8.0492e-51	AVR78_RS21955	EamA/RhaT family transporter
AVR78_RS22005	171.399	60.8086	1.495	4.9753e-58	2.1375e-58	AVR78_RS22005	MFS transporter
AVR78_RS22035	93.9932	45.9167	1.0335	9.2488e-28	1.4732e-28	AVR78_RS22035	hypothetical protein
AVR78_RS22055	127.167	58.7403	1.1143	3.5113e-38	7.8067e-39	AVR78_RS22055	sugar ABC transporter ATP-binding protein
AVR78_RS22065	138.225	43.8484	1.6564	2.285e-49	7.5078e-50	AVR78_RS22065	sugar ABC transporter permease YjfF
AVR78_RS22085	171.399	71.1502	1.2684	7.2115e-54	2.7407e-54	AVR78_RS22085	DUF4432 domain-containing protein
AVR78_RS22125	60.8191	19.8559	1.615	2.0437e-22	2.6966e-23	AVR78_RS22125	membrane protein
AVR78_RS22130	77.4061	35.1614	1.1385	4.126e-24	5.7724e-25	AVR78_RS22130	hypothetical protein
AVR78_RS22140	176.928	64.5316	1.4551	4.1199e-59	1.835e-59	AVR78_RS22140	SelA-like pyridoxal phosphate-dependent enzyme
AVR78_RS22145	110.58	37.6434	1.5546	9.8053e-39	2.2264e-39	AVR78_RS22145	4-hydroxy-2-ketovalerate aldolase
AVR78_RS22150	93.9932	40.1254	1.228	6.8086e-30	1.1659e-30	AVR78_RS22150	lactonase family protein
AVR78_RS22155	199.044	79.8371	1.318	2.3578e-63	1.178e-63	AVR78_RS22155	transcriptional regulator
AVR78_RS22170	121.638	59.9813	1.02	3.1026e-35	6.3092e-36	AVR78_RS22170	anaerobic ribonucleoside-triphosphate reductase-activating protein
AVR78_RS22215	138.225	62.0496	1.1555	5.1669e-42	1.3306e-42	AVR78_RS22215	aspartate carbamoyltransferase regulatory subunit
AVR78_RS22230	193.515	74.8732	1.3699	9.7718e-63	4.7488e-63	AVR78_RS22230	YhcH/YjgK/YiaL family protein
AVR78_RS22290	82.9351	35.5751	1.2211	1.6615e-26	2.5402e-27	AVR78_RS22290	hypothetical protein
AVR78_RS22340	149.283	61.2223	1.2859	1.9441e-47	5.9824e-48	AVR78_RS22340	sugar phosphate isomerase/epimerase
AVR78_RS22350	226.689	66.1862	1.7761	2.4313e-82	1.9023e-82	AVR78_RS22350	ABC transporter substrate-binding protein
AVR78_RS22355	55.2901	15.7192	1.8145	1.4436e-21	1.8516e-22	AVR78_RS22355	ABC transporter ATP-binding protein
AVR78_RS22360	60.8191	22.3379	1.445	2.3191e-21	2.9519e-22	AVR78_RS22360	phosphodiesterase
AVR78_RS22365	44.2321	14.0646	1.653	6.7683e-17	7.2754e-18	AVR78_RS22365	carbohydrate ABC transporter permease
AVR78_RS22380	116.109	43.021	1.4324	4.0137e-39	9.2426e-40	AVR78_RS22380	SulP family inorganic anion transporter
AVR78_RS22385	66.3481	17.3739	1.9331	3.0026e-26	4.5567e-27	AVR78_RS22385	carbonic anhydrase
AVR78_RS22390	33.1741	14.0646	1.238	1.3815e-11	1.2049e-12	AVR78_RS22390	hypothetical protein
AVR78_RS22395	171.399	50.467	1.7639	1.6132e-62	7.7688e-63	AVR78_RS22395	tRNA-Leu
AVR78_RS22405	414.676	116.653	1.8298	5.044e-151	9.544e-151	AVR78_RS22405	integrase
AVR78_RS22410	481.024	210.555	1.1919	1.1906e-143	2.1463e-143	AVR78_RS22410	restriction endonuclease
AVR78_RS22455	149.283	69.0819	1.1117	1.7917e-44	4.995e-45	AVR78_RS22455	HNH endonuclease
AVR78_RS22465	165.87	79.4235	1.0624	2.9521e-48	9.4099e-49	AVR78_RS22465	MFS transporter
AVR78_RS22470	149.283	65.7726	1.1825	1.069e-45	3.0967e-46	AVR78_RS22470	xylose isomerase
AVR78_RS22480	176.928	56.672	1.6425	1.9011e-62	9.1389e-63	AVR78_RS22480	DUF1722 domain-containing protein
AVR78_RS22485	55.2901	17.3739	1.6701	8.049e-21	1.0044e-21	AVR78_RS22485	DUF3833 domain-containing protein
AVR78_RS22525	49.7611	18.6149	1.4186	1.2686e-17	1.4044e-18	AVR78_RS22525	hypothetical protein
AVR78_RS22545	326.212	122.858	1.4088	7.9691e-106	9.3662e-106	AVR78_RS22545	CusA/CzcA family heavy metal efflux RND transporter
AVR78_RS22550	132.696	30.1975	2.1356	5.8004e-53	2.1644e-53	AVR78_RS22550	efflux RND transporter periplasmic adaptor subunit
AVR78_RS22555	33.1741	2.48198	3.7405	7.7666e-17	8.3217e-18	AVR78_RS22555	periplasmic copper-binding protein
AVR78_RS22560	66.3481	30.6111	1.116	1.0127e-20	1.2602e-21	AVR78_RS22560	copper/silver efflux system outer membrane protein CusC
AVR78_RS22575	215.631	96.3837	1.1617	1.0735e-64	5.649e-65	AVR78_RS22575	two-component sensor histidine kinase
AVR78_RS22600	22.116	2.48198	3.1555	2.1384e-11	1.847e-12	rrf	5S ribosomal RNA
AVR78_RS22655	22.116	5.37763	2.0401	5.9304e-10	4.8356e-11	AVR78_RS22655	BMC domain-containing protein
AVR78_RS22665	243.276	84.8011	1.5204	3.1839e-82	2.4765e-82	AVR78_RS22665	choline trimethylamine-lyase
AVR78_RS22670	110.58	48.8123	1.1798	2.906e-34	5.7516e-35	AVR78_RS22670	iron-containing alcohol dehydrogenase
AVR78_RS22675	5.52901	1.65466	1.7405	0.0028094	0.00017089	AVR78_RS22675	ethanolamine utilization protein EutN
AVR78_RS22725	66.3481	29.3701	1.1757	3.4978e-21	4.4248e-22	AVR78_RS22725	FosA family fosfomycin resistance glutathione transferase
AVR78_RS22750	55.2901	26.4745	1.0624	3.5456e-17	3.8531e-18	AVR78_RS22750	HlyD family secretion protein
AVR78_RS22755	210.102	64.5316	1.703	5.0066e-75	3.3101e-75	AVR78_RS22755	DUF2955 domain-containing protein
AVR78_RS22760	44.2321	21.9242	1.0126	8.8625e-14	8.4055e-15	AVR78_RS22760	DUF3343 domain-containing protein
AVR78_RS22790	77.4061	15.7192	2.2999	1.5101e-32	2.8096e-33	AVR78_RS22790	LysE family translocator
AVR78_RS22800	182.457	71.9775	1.3419	1.0544e-58	4.642e-59	AVR78_RS22800	ISNCY family transposase
AVR78_RS22810	44.2321	21.9242	1.0126	8.8625e-14	8.4055e-15	AVR78_RS22810	hypothetical protein
AVR78_RS22830	193.515	77.3552	1.3229	9.4936e-62	4.4829e-62	AVR78_RS22830	carbon starvation protein A
AVR78_RS22900	182.457	55.8446	1.7081	1.7423e-65	9.4098e-66	AVR78_RS22900	pyridine nucleotide-disulfide oxidoreductase
AVR78_RS22910	44.2321	14.8919	1.5706	1.5563e-16	1.6366e-17	AVR78_RS22910	FAD-binding oxidoreductase
AVR78_RS22915	99.5222	15.7192	2.6625	1.3471e-43	3.6451e-44	AVR78_RS22915	4-hydroxyproline epimerase
AVR78_RS22925	116.109	39.2981	1.563	1.1068e-40	2.7041e-41	AVR78_RS22925	dihydrodipicolinate synthase family protein
AVR78_RS22930	110.58	36.4024	1.603	2.8742e-39	6.6971e-40	AVR78_RS22930	aldehyde dehydrogenase (NADP(+))
AVR78_RS22935	259.863	83.5601	1.6369	1.0482e-90	9.6102e-91	AVR78_RS22935	APC family permease
AVR78_RS22940	154.812	66.1862	1.2259	4.3347e-48	1.3751e-48	AVR78_RS22940	dehydrogenase
AVR78_RS22945	182.457	59.5676	1.615	7.4729e-64	3.8121e-64	AVR78_RS22945	amino acid deaminase
AVR78_RS22955	287.508	76.5278	1.9095	2.571e-107	3.0897e-107	AVR78_RS22955	D-aminoacylase
AVR78_RS22960	88.4641	33.9204	1.3829	9.5599e-30	1.6297e-30	AVR78_RS22960	RidA family protein
AVR78_RS22975	160.341	78.1825	1.0362	3.3095e-46	9.735e-47	AVR78_RS22975	2-dehydro-3-deoxy-6-phosphogalactonate aldolase
AVR78_RS22990	215.631	86.0421	1.3255	1.173e-68	6.759e-69	AVR78_RS22990	N-acetyltransferase
AVR78_RS23000	71.8771	16.5466	2.119	2.1913e-29	3.6839e-30	AVR78_RS23000	PTS mannose transporter subunit IIA
AVR78_RS23005	38.7031	14.4782	1.4186	4.7982e-14	4.6015e-15	AVR78_RS23005	PTS mannose/fructose/sorbose transporter subunit IIB
AVR78_RS23015	71.8771	34.7478	1.0486	9.6881e-22	1.2487e-22	AVR78_RS23015	PTS mannose transporter subunit IID
AVR78_RS23020	121.638	41.3664	1.5561	1.8782e-42	4.8888e-43	AVR78_RS23020	SIS domain-containing protein
AVR78_RS23025	171.399	73.6322	1.219	6.46e-53	2.3971e-53	AVR78_RS23025	SIS domain-containing protein
AVR78_RS23065	27.645	7.44595	1.8925	9.8032e-12	8.6034e-13	AVR78_RS23065	hypothetical protein
AVR78_RS23095	259.863	119.549	1.1202	2.4506e-76	1.6721e-76	AVR78_RS23095	PTS cellobiose transporter subunit IIC
AVR78_RS23115	127.167	61.2223	1.0546	2.7651e-37	5.9734e-38	AVR78_RS23115	DUF1435 domain-containing protein
AVR78_RS23215	38.7031	4.96397	2.9629	1.5933e-18	1.8299e-19	AVR78_RS23215	phosphoserine phosphatase
AVR78_RS23240	49.7611	7.85961	2.6625	1.2378e-22	1.6512e-23	AVR78_RS23240	methionine aminopeptidase
AVR78_RS23285	226.689	80.2508	1.4981	3.1464e-76	2.1414e-76	AVR78_RS23285	cell envelope integrity protein CreD
AVR78_RS23350	293.037	129.063	1.183	5.7346e-88	5.0661e-88	AVR78_RS23350	MFS transporter
AVR78_RS23355	82.9351	32.6795	1.3436	1.2281e-27	1.9515e-28	AVR78_RS23355	hypothetical protein
AVR78_RS23450	215.631	78.5961	1.456	1.1587e-71	7.2569e-72	AVR78_RS23450	sensor histidine kinase
AVR78_RS23455	293.037	82.3191	1.8318	2.3665e-107	2.8569e-107	AVR78_RS23455	sodium ion-translocating decarboxylase subunit beta
AVR78_RS23460	116.109	32.6795	1.829	1.2998e-43	3.5241e-44	AVR78_RS23460	oxaloacetate decarboxylase subunit alpha
AVR78_RS23470	71.8771	33.0931	1.119	2.4336e-22	3.2047e-23	AVR78_RS23470	citrate/sodium symporter CitN
AVR78_RS23475	88.4641	37.6434	1.2327	2.8e-28	4.511e-29	AVR78_RS23475	[citrate (pro-3S)-lyase] ligase
AVR78_RS23480	11.058	1.24099	3.1555	2.1911e-06	1.5396e-07	AVR78_RS23480	citrate lyase acyl carrier protein
AVR78_RS23485	77.4061	25.6472	1.5936	6.3687e-28	1.0168e-28	AVR78_RS23485	citrate (pro-3S)-lyase subunit beta
AVR78_RS23495	226.689	60.3949	1.9082	5.4063e-85	4.5645e-85	AVR78_RS23495	triphosphoribosyl-dephospho-CoA synthase CitG
AVR78_RS23530	425.734	206.832	1.0415	6.5981e-120	9.3635e-120	AVR78_RS23530	glutathione-regulated potassium-efflux system protein KefC
AVR78_RS23590	331.741	114.171	1.5389	4.779e-112	6.1895e-112	AVR78_RS23590	citrate/acetate antiporter
AVR78_RS23625	105.051	26.8882	1.966	7.1775e-41	1.7731e-41	AVR78_RS23625	L-arabinose isomerase
AVR78_RS23630	171.399	47.5714	1.8492	7.7721e-64	3.9572e-64	AVR78_RS23630	ribulokinase
AVR78_RS23675	276.45	116.24	1.2499	3.4589e-85	2.9389e-85	AVR78_RS23675	MFS transporter
AVR78_RS23700	49.7611	16.5466	1.5885	1.6954e-18	1.9397e-19	AVR78_RS23700	shikimate dehydrogenase
AVR78_RS23720	154.812	71.1502	1.1216	3.1045e-46	9.1522e-47	AVR78_RS23720	3-isopropylmalate dehydrogenase
AVR78_RS23730	16.587	6.61862	1.3255	1.1949e-06	8.5468e-08	AVR78_RS23730	leucine operon leader peptide
AVR78_RS23740	149.283	73.2185	1.0278	5.4521e-43	1.4474e-43	AVR78_RS23740	transcriptional regulator LeuO
AVR78_RS23745	71.8771	31.8521	1.1741	8.4102e-23	1.1287e-23	AVR78_RS23745	hypothetical protein
AVR78_RS23765	38.7031	10.7553	1.8474	1.1162e-15	1.1366e-16	AVR78_RS23765	hypothetical protein
AVR78_RS23890	149.283	48.3987	1.625	1.0167e-52	3.7412e-53	AVR78_RS23890	type IV pilin biogenesis protein
AVR78_RS23895	77.4061	30.6111	1.3384	7.349e-26	1.0984e-26	AVR78_RS23895	type II secretion system protein GspE
AVR78_RS23920	182.457	76.5278	1.2535	6.3492e-57	2.6303e-57	AVR78_RS23920	alpha-N-arabinofuranosidase
AVR78_RS23925	154.812	43.4347	1.8336	1.2771e-57	5.3995e-58	AVR78_RS23925	MFS transporter
AVR78_RS23960	49.7611	24.8198	1.0035	2.939e-15	2.9434e-16	AVR78_RS23960	hypothetical protein
AVR78_RS23965	154.812	41.7801	1.8896	2.2069e-58	9.6207e-59	AVR78_RS23965	DUF2950 domain-containing protein
AVR78_RS24000	160.341	70.7365	1.1806	6.446e-49	2.0947e-49	AVR78_RS24000	FKBP-type peptidyl-prolyl cis-trans isomerase
AVR78_RS24100	132.696	51.708	1.3597	1.9627e-43	5.284e-44	AVR78_RS24100	RNA 2'%2C3'-cyclic phosphodiesterase
AVR78_RS24110	82.9351	39.7117	1.0624	5.6596e-25	8.1443e-26	AVR78_RS24110	prepilin peptidase
AVR78_RS24135	27.645	5.37763	2.362	9.5338e-13	8.6752e-14	AVR78_RS24135	type II secretion system protein GspJ
AVR78_RS24140	16.587	2.89565	2.5181	2.1894e-08	1.6872e-09	AVR78_RS24140	type II secretion system protein GspI
AVR78_RS24150	55.2901	7.85961	2.8145	2.1023e-25	3.0987e-26	AVR78_RS24150	type II secretion system protein GspG
AVR78_RS24155	38.7031	15.7192	1.2999	1.5264e-13	1.4344e-14	AVR78_RS24155	type II secretion system protein GspF
AVR78_RS24160	138.225	19.0285	2.8608	3.0467e-61	1.4235e-61	AVR78_RS24160	type II secretion system protein GspE
AVR78_RS24165	127.167	59.1539	1.1042	4.9701e-38	1.0977e-38	AVR78_RS24165	type II secretion system protein GspD
AVR78_RS24170	88.4641	28.5428	1.632	5.243e-32	9.5287e-33	AVR78_RS24170	type II secretion system protein GspC
AVR78_RS24180	270.921	123.686	1.1312	7.454e-80	5.4634e-80	AVR78_RS24180	DUF3372 domain-containing protein
AVR78_RS24185	99.5222	23.1652	2.1031	6.5179e-40	1.5444e-40	AVR78_RS24185	general secretion pathway protein GspB
AVR78_RS24420	16.587	7.03229	1.238	1.7538e-06	1.2388e-07	AVR78_RS24420	hypothetical protein
AVR78_RS24485	11.058	1.65466	2.7405	3.5204e-06	2.4587e-07	AVR78_RS24485	tRNA-Asp
AVR78_RS24490	77.4061	33.0931	1.2259	6.8615e-25	9.8368e-26	AVR78_RS24490	2%2C5-didehydrogluconate reductase DkgB
AVR78_RS24500	99.5222	47.5714	1.0649	1.1417e-29	1.9377e-30	AVR78_RS24500	MFS transporter
AVR78_RS24540	60.8191	23.1652	1.3926	5.0713e-21	6.376e-22	AVR78_RS24540	tRNA-Asp
AVR78_RS24550	204.573	67.0136	1.6101	2.8486e-71	1.7552e-71	AVR78_RS24550	cysteine/O-acetylserine transporter
AVR78_RS24625	116.109	24.4062	2.2502	1.5014e-47	4.6416e-48	AVR78_RS24625	glycerophosphoryl diester phosphodiesterase
AVR78_RS24660	143.754	39.2981	1.8711	4.1446e-54	1.5887e-54	AVR78_RS24660	serine acetyltransferase
AVR78_RS24665	77.4061	38.4707	1.0087	6.4457e-23	8.694e-24	AVR78_RS24665	beta-galactosidase
AVR78_RS24670	38.7031	11.9963	1.6899	4.1072e-15	4.0949e-16	AVR78_RS24670	hypothetical protein
AVR78_RS24675	99.5222	48.8123	1.0278	3.1582e-29	5.2861e-30	AVR78_RS24675	glycosyltransferase family 1 protein
AVR78_RS24685	121.638	51.708	1.2341	2.8514e-38	6.3607e-39	AVR78_RS24685	glycosyl transferase
AVR78_RS24750	38.7031	10.3416	1.904	7.1516e-16	7.3385e-17	AVR78_RS24750	hypothetical protein
AVR78_RS24785	221.16	103.002	1.1024	8.745e-65	4.6201e-65	AVR78_RS24785	carbohydrate kinase
AVR78_RS24800	44.2321	14.0646	1.653	6.7683e-17	7.2754e-18	AVR78_RS24800	hypothetical protein
AVR78_RS24810	204.573	53.3626	1.9387	2.0405e-77	1.444e-77	AVR78_RS24810	dihydrolipoyl dehydrogenase
AVR78_RS24815	154.812	52.1217	1.5706	8.9796e-54	3.3982e-54	AVR78_RS24815	dihydrolipoamide acetyltransferase acetoin dehydrogenase complex
AVR78_RS24820	143.754	64.1179	1.1648	8.8847e-44	2.4237e-44	AVR78_RS24820	alpha-ketoacid dehydrogenase subunit beta
AVR78_RS24825	215.631	79.8371	1.4334	3.7502e-71	2.3001e-71	AVR78_RS24825	acetoin:2%2C6-dichlorophenolindophenol oxidoreductase subunit alpha
AVR78_RS24850	66.3481	23.9925	1.4675	2.5872e-23	3.5326e-24	AVR78_RS24850	hypothetical protein
AVR78_RS24895	138.225	49.226	1.4895	4.575e-47	1.3886e-47	AVR78_RS24895	hypothetical protein
AVR78_RS24940	99.5222	30.6111	1.701	1.8634e-36	3.9331e-37	AVR78_RS24940	EamA/RhaT family transporter
AVR78_RS24945	176.928	64.5316	1.4551	4.1199e-59	1.835e-59	AVR78_RS24945	HAD-IB family hydrolase
AVR78_RS24960	77.4061	22.7515	1.7665	3.3335e-29	5.5724e-30	AVR78_RS24960	phosphonate ABC transporter%2C permease protein PhnE
AVR78_RS24965	27.645	10.7553	1.362	2.7958e-10	2.3058e-11	AVR78_RS24965	phosphonate ABC transporter%2C permease protein PhnE
AVR78_RS24975	49.7611	14.8919	1.7405	3.1401e-19	3.6938e-20	AVR78_RS24975	phosphonate ABC transporter ATP-binding protein
AVR78_RS24995	315.154	110.035	1.5181	7.0394e-106	8.31e-106	AVR78_RS24995	fimbrial biogenesis outer membrane usher protein
AVR78_RS25005	132.696	34.7478	1.9331	8.5466e-51	2.9422e-51	AVR78_RS25005	hypothetical protein
AVR78_RS25015	77.4061	34.3341	1.1728	2.0278e-24	2.87e-25	AVR78_RS25015	amino acid ABC transporter permease
AVR78_RS25020	49.7611	20.6832	1.2666	8.5691e-17	9.1448e-18	AVR78_RS25020	amino acid ABC transporter ATP-binding protein
AVR78_RS25025	116.109	30.1975	1.943	9.1828e-45	2.5789e-45	AVR78_RS25025	cysteine ABC transporter substrate-binding protein
AVR78_RS25035	143.754	43.4347	1.7267	3.1365e-52	1.137e-52	AVR78_RS25035	ABC transporter ATP-binding protein
AVR78_RS25040	44.2321	14.0646	1.653	6.7683e-17	7.2754e-18	livG	ABC transporter ATP-binding protein
AVR78_RS25045	60.8191	18.2012	1.7405	3.7757e-23	5.1395e-24	AVR78_RS25045	branched-chain amino acid ABC transporter permease
AVR78_RS25050	44.2321	21.5105	1.0401	6.3114e-14	6.0223e-15	AVR78_RS25050	branched-chain amino acid ABC transporter permease
AVR78_RS25055	105.051	44.262	1.247	1.9479e-33	3.7686e-34	AVR78_RS25055	branched-chain amino acid ABC transporter substrate-binding protein
AVR78_RS25095	93.9932	35.5751	1.4017	1.0892e-31	1.9595e-32	AVR78_RS25095	taurine ABC transporter substrate-binding protein
AVR78_RS25100	121.638	37.2298	1.7081	2.9653e-44	8.1982e-45	tauB	taurine ABC transporter ATP-binding protein
AVR78_RS25105	49.7611	19.0285	1.3869	1.8738e-17	2.0573e-18	AVR78_RS25105	taurine transporter subunit
AVR78_RS25115	210.102	91.8334	1.194	7.3351e-64	3.749e-64	AVR78_RS25115	hypothetical protein
AVR78_RS25120	77.4061	34.7478	1.1555	2.896e-24	4.075e-25	AVR78_RS25120	transposase
AVR78_RS25270	215.631	78.1825	1.4636	7.8187e-72	4.9198e-72	AVR78_RS25270	LysR family transcriptional regulator
AVR78_RS25275	71.8771	28.9565	1.3116	6.4328e-24	8.9387e-25	AVR78_RS25275	hydrolase
AVR78_RS25280	66.3481	15.7192	2.0775	4.8904e-27	7.6166e-28	AVR78_RS25280	antibiotic biosynthesis monooxygenase
AVR78_RS25285	221.16	86.4558	1.3551	4.4142e-71	2.7011e-71	AVR78_RS25285	amidohydrolase
AVR78_RS25470	27.645	10.3416	1.4186	1.8884e-10	1.5671e-11	AVR78_RS25470	sugar phosphate isomerase/epimerase
AVR78_RS25475	171.399	46.744	1.8745	3.2317e-64	1.6709e-64	AVR78_RS25475	fumarate reductase/succinate dehydrogenase flavoprotein domain-containing protein
AVR78_RS25485	121.638	45.9167	1.4055	1.4759e-40	3.5796e-41	AVR78_RS25485	FAD-binding protein
AVR78_RS25490	66.3481	29.3701	1.1757	3.4978e-21	4.4248e-22	AVR78_RS25490	shikimate dehydrogenase
AVR78_RS25500	66.3481	28.5428	1.2169	1.698e-21	2.1728e-22	AVR78_RS25500	hypothetical protein
AVR78_RS25600	138.225	63.7042	1.1176	2.1044e-41	5.2668e-42	AVR78_RS25600	HMP-PP phosphatase
AVR78_RS25675	143.754	47.1577	1.608	1.3573e-50	4.6307e-51	AVR78_RS25675	membrane protein
AVR78_RS25680	149.283	32.6795	2.1916	5.4983e-60	2.499e-60	AVR78_RS25680	nickel/cobalt efflux protein RcnA
AVR78_RS25715	60.8191	29.7838	1.03	1.6756e-18	1.9211e-19	AVR78_RS25715	arabinogalactan ABC transporter permease
AVR78_RS25720	165.87	57.913	1.5181	1.314e-56	5.3687e-57	AVR78_RS25720	glycosyl hydrolase family 53
AVR78_RS25730	60.8191	19.4422	1.6453	1.3469e-22	1.7905e-23	AVR78_RS25730	PTS IIB component
AVR78_RS25755	88.4641	32.2658	1.4551	2.0096e-30	3.5135e-31	AVR78_RS25755	N-acetyltransferase
AVR78_RS25760	398.089	140.232	1.5053	1.0414e-132	1.6839e-132	AVR78_RS25760	PLP-dependent aminotransferase family protein
AVR78_RS25985	49.7611	19.0285	1.3869	1.8738e-17	2.0573e-18	AVR78_RS25985	MarR family transcriptional regulator
AVR78_RS25990	60.8191	8.68694	2.8076	9.2671e-28	1.4752e-28	AVR78_RS25990	hypothetical protein
AVR78_RS26020	55.2901	19.0285	1.5389	4.2203e-20	5.1578e-21	AVR78_RS26020	hypothetical protein
AVR78_RS26070	11.058	1.24099	3.1555	2.1911e-06	1.5396e-07	AVR78_RS26070	hypothetical protein
AVR78_RS26085	320.683	151.815	1.0788	3.2773e-92	3.1006e-92	AVR78_RS26085	DUF927 domain-containing protein
AVR78_RS26095	38.7031	17.7875	1.1216	9.5019e-13	8.658e-14	AVR78_RS26095	single-stranded DNA-binding protein
AVR78_RS26100	171.399	53.7763	1.6723	4.7947e-61	2.2325e-61	AVR78_RS26100	hypothetical protein
AVR78_RS26110	105.051	34.7478	1.5961	2.5545e-37	5.5365e-38	AVR78_RS26110	PerC family transcriptional regulator
AVR78_RS26115	293.037	81.9055	1.8391	1.5309e-107	1.8736e-107	AVR78_RS26115	hypothetical protein
AVR78_RS26175	60.8191	14.8919	2.03	1.0917e-24	1.5542e-25	AVR78_RS26175	AlpA family transcriptional regulator
AVR78_RS26230	237.747	91.0061	1.3854	4.7631e-77	3.3266e-77	cadB	lysine/cadaverine antiporter
AVR78_RS26235	270.921	74.8732	1.8554	5.8293e-100	6.1961e-100	AVR78_RS26235	lysine decarboxylase CadA
AVR78_RS26240	160.341	46.3304	1.7911	5.3174e-59	2.3605e-59	AVR78_RS26240	MFS transporter
AVR78_RS26265	165.87	63.7042	1.3806	3.1888e-54	1.2294e-54	AVR78_RS26265	gfo/Idh/MocA family oxidoreductase
AVR78_RS26270	221.16	60.8086	1.8627	4.2925e-82	3.3099e-82	AVR78_RS26270	gfo/Idh/MocA family oxidoreductase
AVR78_RS26275	77.4061	32.2658	1.2624	3.2913e-25	4.8089e-26	AVR78_RS26275	inositol 2-dehydrogenase
AVR78_RS26280	176.928	74.4595	1.2486	3.711e-55	1.4582e-55	AVR78_RS26280	LacI family transcriptional regulator
AVR78_RS26285	204.573	75.7005	1.4342	1.2906e-67	7.3107e-68	AVR78_RS26285	LacI family transcriptional regulator
AVR78_RS26290	259.863	88.1104	1.5604	9.53e-89	8.5898e-89	AVR78_RS26290	sugar ABC transporter ATP-binding protein
AVR78_RS26305	49.7611	21.0969	1.238	1.2409e-16	1.3118e-17	AVR78_RS26305	hypothetical protein
AVR78_RS26345	27.645	5.7913	2.2551	1.5373e-12	1.3898e-13	AVR78_RS26345	DUF3302 domain-containing protein
AVR78_RS26350	127.167	62.8769	1.0161	1.0647e-36	2.2633e-37	AVR78_RS26350	HlyD family secretion protein
AVR78_RS26355	127.167	29.3701	2.1143	1.2713e-50	4.3428e-51	AVR78_RS26355	iron ABC transporter ATP-binding protein
AVR78_RS26360	60.8191	24.8198	1.293	2.3307e-20	2.8722e-21	AVR78_RS26360	iron ABC transporter permease
AVR78_RS26395	204.573	74.0458	1.4661	2.6878e-68	1.5388e-68	AVR78_RS26395	amidohydrolase
AVR78_RS26410	16.587	5.37763	1.625	3.5129e-07	2.5804e-08	AVR78_RS26410	hypothetical protein
AVR78_RS26430	149.283	66.5999	1.1645	2.179e-45	6.2511e-46	AVR78_RS26430	arylsulfatase
AVR78_RS26435	121.638	40.5391	1.5852	8.3074e-43	2.1858e-43	AVR78_RS26435	anaerobic sulfatase maturase
AVR78_RS26450	171.399	80.2508	1.0948	1.845e-50	6.2784e-51	AVR78_RS26450	class II histone deacetylase
AVR78_RS26455	38.7031	15.7192	1.2999	1.5264e-13	1.4344e-14	AVR78_RS26455	DUF3156 domain-containing protein
AVR78_RS26460	105.051	51.2943	1.0342	7.7108e-31	1.3588e-31	AVR78_RS26460	APC family permease
AVR78_RS26465	66.3481	28.9565	1.1962	2.4405e-21	3.1035e-22	AVR78_RS26465	hypothetical protein
AVR78_RS26470	116.109	43.021	1.4324	4.0137e-39	9.2426e-40	AVR78_RS26470	cupin domain-containing protein
AVR78_RS26500	160.341	47.985	1.7405	2.9603e-58	1.2842e-58	AVR78_RS26500	MFS transporter
AVR78_RS26505	88.4641	23.1652	1.9331	1.9221e-34	3.8299e-35	AVR78_RS26505	sugar phosphate isomerase/epimerase
AVR78_RS26535	165.87	50.0533	1.7285	5.1299e-60	2.3355e-60	AVR78_RS26535	hypothetical protein
AVR78_RS26540	309.625	92.6607	1.7405	9.449e-111	1.2062e-110	AVR78_RS26540	hypothetical protein
AVR78_RS26555	66.3481	21.9242	1.5975	3.4167e-24	4.7951e-25	AVR78_RS26555	RmbA
AVR78_RS26580	99.5222	31.4385	1.6625	4.3262e-36	9.0259e-37	AVR78_RS26580	MFS transporter
AVR78_RS26600	138.225	60.8086	1.1847	1.7772e-42	4.635e-43	AVR78_RS26600	phosphosugar isomerase
AVR78_RS26605	60.8191	22.3379	1.445	2.3191e-21	2.9519e-22	AVR78_RS26605	SIS domain-containing protein
AVR78_RS26610	71.8771	17.7875	2.0147	8.6652e-29	1.4192e-29	AVR78_RS26610	PTS mannose transporter subunit IID
AVR78_RS26615	44.2321	20.6832	1.0966	3.1631e-14	3.0576e-15	AVR78_RS26615	PTS mannose/fructose/sorbose/N-acetylgalactosamine transporter subunit IIC
AVR78_RS26660	27.645	9.92793	1.4775	1.2661e-10	1.0562e-11	AVR78_RS26660	hypothetical protein
AVR78_RS26690	187.986	90.1787	1.0598	2.1514e-54	8.3305e-55	AVR78_RS26690	peptide ABC transporter substrate-binding protein
AVR78_RS26695	110.58	38.4707	1.5233	2.201e-38	4.9222e-39	AVR78_RS26695	ABC transporter permease
AVR78_RS26700	60.8191	21.0969	1.5275	6.9919e-22	9.0598e-23	AVR78_RS26700	ABC transporter permease
AVR78_RS26705	60.8191	29.7838	1.03	1.6756e-18	1.9211e-19	AVR78_RS26705	ABC transporter ATP-binding protein
AVR78_RS26710	71.8771	20.2695	1.8262	1.2587e-27	1.9965e-28	dppD	ABC transporter ATP-binding protein
AVR78_RS26715	182.457	67.0136	1.445	1.0379e-60	4.7909e-61	AVR78_RS26715	Zn-dependent hydrolase
AVR78_RS26730	226.689	47.5714	2.2526	3.9464e-91	3.6432e-91	AVR78_RS26730	PLP-dependent aminotransferase family protein
AVR78_RS26740	93.9932	26.0608	1.8507	8.143e-36	1.6815e-36	AVR78_RS26740	amino acid ABC transporter permease
AVR78_RS26745	116.109	33.9204	1.7753	4.7727e-43	1.2721e-43	AVR78_RS26745	amino acid ABC transporter permease
AVR78_RS26750	199.044	77.7688	1.3558	3.5678e-64	1.8376e-64	AVR78_RS26750	amino acid ABC transporter ATP-binding protein
AVR78_RS26755	105.051	47.1577	1.1555	2.43e-32	4.4743e-33	AVR78_RS26755	oxidoreductase
AVR78_RS26760	210.102	62.4633	1.75	5.9895e-76	4.0251e-76	AVR78_RS26760	aspartate aminotransferase family protein
AVR78_RS26770	5.52901	0	2.7405	0.0010401	6.4457e-05	AVR78_RS26770	hypothetical protein
AVR78_RS26825	199.044	65.7726	1.5975	3.7747e-69	2.1989e-69	AVR78_RS26825	choline dehydrogenase
AVR78_RS26840	215.631	83.5601	1.3677	1.2082e-69	7.0842e-70	AVR78_RS26840	high-affinity choline transporter BetT
AVR78_RS26870	165.87	67.0136	1.3075	6.6045e-53	2.4473e-53	AVR78_RS26870	carbohydrate kinase
AVR78_RS26880	93.9932	32.2658	1.5426	4.5731e-33	8.7148e-34	AVR78_RS26880	transketolase
AVR78_RS26885	49.7611	21.9242	1.1825	2.5723e-16	2.6818e-17	AVR78_RS26885	transketolase
AVR78_RS26900	116.109	34.3341	1.7578	7.3364e-43	1.9379e-43	AVR78_RS26900	ABC transporter permease
AVR78_RS26905	304.096	98.0384	1.6331	1.0428e-105	1.2203e-105	AVR78_RS26905	sugar ABC transporter ATP-binding protein
AVR78_RS26910	71.8771	19.4422	1.8863	5.2176e-28	8.3506e-29	AVR78_RS26910	DUF2291 domain-containing protein
AVR78_RS26920	121.638	26.8882	2.1776	4.3949e-49	1.4352e-49	AVR78_RS26920	enterobactin synthase subunit EntD
AVR78_RS26930	27.645	8.68694	1.6701	3.6467e-11	3.1153e-12	AVR78_RS26930	hypothetical protein
AVR78_RS27020	149.283	50.0533	1.5765	5.2626e-52	1.8973e-52	AVR78_RS27020	3-oxoacyl-ACP reductase FabG
AVR78_RS27030	33.1741	4.5503	2.866	5.9204e-16	6.0939e-17	AVR78_RS27030	VOC family protein
AVR78_RS27045	5.52901	0	2.7405	0.0010401	6.4457e-05	AVR78_RS27045	glycosyl transferase
AVR78_RS27095	38.7031	11.1689	1.793	1.7327e-15	1.7517e-16	AVR78_RS27095	phospholipase D family protein
AVR78_RS27130	5.52901	2.48198	1.1555	0.0066046	0.00039236	AVR78_RS27130	hypothetical protein
AVR78_RS27135	49.7611	11.5826	2.1031	8.8051e-21	1.0977e-21	AVR78_RS27135	glycosyl transferase
AVR78_RS27145	44.2321	16.9602	1.3829	1.1486e-15	1.1687e-16	AVR78_RS27145	SulP family inorganic anion transporter
AVR78_RS27170	5.52901	2.48198	1.1555	0.0066046	0.00039236	AVR78_RS27170	mercury transporter MerC
AVR78_RS27190	5.52901	0	3.467	0.00071744	4.4827e-05	AVR78_RS27190	hypothetical protein
AVR78_RS27205	27.645	11.5826	1.2551	5.9975e-10	4.8843e-11	AVR78_RS27205	C2H2-type zinc finger protein
AVR78_RS27215	44.2321	1.65466	4.7405	6.1583e-22	7.9991e-23	AVR78_RS27215	hypothetical protein
AVR78_RS27290	49.7611	7.85961	2.6625	1.2378e-22	1.6512e-23	AVR78_RS27290	type-F conjugative transfer system pilin acetylase TraX
AVR78_RS27295	193.515	35.1614	2.4604	9.0814e-81	6.9028e-81	AVR78_RS27295	conjugal transfer nickase/helicase TraI
AVR78_RS27300	44.2321	7.85961	2.4926	7.4076e-20	8.9346e-21	AVR78_RS27300	conjugal transfer protein TraM
AVR78_RS27305	49.7611	13.2372	1.9104	5.4327e-20	6.6094e-21	AVR78_RS27305	lytic transglycosylase
AVR78_RS27310	33.1741	7.44595	2.1555	1.6696e-14	1.6311e-15	AVR78_RS27310	antirestriction protein
AVR78_RS27315	33.1741	5.7913	2.5181	2.4838e-15	2.496e-16	AVR78_RS27315	hypothetical protein
AVR78_RS27320	5.52901	1.65466	1.7405	0.0028094	0.00017089	AVR78_RS27320	parB-like nuclease domain-containing protein
AVR78_RS27330	49.7611	6.61862	2.9104	3.0027e-23	4.0914e-24	AVR78_RS27330	single-stranded DNA-binding protein
AVR78_RS27340	33.1741	1.24099	4.7405	7.6138e-17	8.1645e-18	AVR78_RS27340	hypothetical protein
AVR78_RS27345	11.058	4.5503	1.2811	8.3577e-05	5.4719e-06	AVR78_RS27345	hypothetical protein
AVR78_RS27355	22.116	2.06832	3.4186	1.4124e-11	1.231e-12	AVR78_RS27355	antirestriction protein
AVR78_RS27360	16.587	3.72298	2.1555	5.7572e-08	4.3698e-09	AVR78_RS27360	hypothetical protein
AVR78_RS27395	5.52901	2.06832	1.4186	0.0043884	0.00026376	AVR78_RS27395	hypothetical protein
AVR78_RS27420	33.1741	14.8919	1.1555	2.8671e-11	2.4596e-12	AVR78_RS27420	recombinase
AVR78_RS27425	16.587	0	4.3255	3.3012e-09	2.6173e-10	AVR78_RS27425	IS3 family transposase
AVR78_RS27430	11.058	4.13664	1.4186	5.6058e-05	3.7075e-06	AVR78_RS27430	istB-like ATP-binding family protein
AVR78_RS27440	16.587	6.61862	1.3255	1.1949e-06	8.5468e-08	AVR78_RS27440	hypothetical protein
AVR78_RS27455	66.3481	9.10061	2.866	2.567e-30	4.453e-31	AVR78_RS27455	fimbrial biogenesis outer membrane usher protein
AVR78_RS27460	44.2321	13.6509	1.6961	4.4314e-17	4.7943e-18	AVR78_RS27460	fimbrial protein
AVR78_RS27465	60.8191	11.1689	2.445	1.6143e-26	2.4723e-27	AVR78_RS27465	type 1 fimbrial protein
AVR78_RS27485	5.52901	0	2.7405	0.0010401	6.4457e-05	AVR78_RS27485	IS5/IS1182 family transposase
AVR78_RS27490	27.645	13.6509	1.018	3.5879e-09	2.8371e-10	lacY	MFS transporter
AVR78_RS27530	60.8191	19.8559	1.615	2.0437e-22	2.6966e-23	AVR78_RS27530	arsenical resistance protein ArsH
AVR78_RS27535	16.587	6.61862	1.3255	1.1949e-06	8.5468e-08	AVR78_RS27535	transcriptional regulator
AVR78_RS27550	27.645	6.20496	2.1555	2.4665e-12	2.2127e-13	AVR78_RS27550	hypothetical protein
AVR78_RS27560	5.52901	0	3.7405	0.0006674	4.1749e-05	AVR78_RS27560	IS66 family insertion sequence hypothetical protein
AVR78_RS27570	22.116	4.5503	2.2811	2.3079e-10	1.9081e-11	fecD	Fe(3+) dicitrate ABC transporter permease FecD
AVR78_RS27580	33.1741	8.27328	2.0035	4.2158e-14	4.0576e-15	fecB	Fe(3+) dicitrate ABC transporter substrate-binding protein FecB
AVR78_RS27585	44.2321	12.8236	1.7863	1.8724e-17	2.0573e-18	AVR78_RS27585	TonB-dependent siderophore receptor
AVR78_RS27595	11.058	3.72298	1.5706	3.6911e-05	2.4705e-06	AVR78_RS27595	RNA polymerase sigma factor FecI
AVR78_RS27615	55.2901	8.68694	2.6701	5.4258e-25	7.8332e-26	AVR78_RS27615	glycine cleavage system transcriptional activator GcvA
AVR78_RS27620	22.116	9.10061	1.2811	2.6456e-08	2.0324e-09	AVR78_RS27620	amino acid ABC transporter
AVR78_RS27625	22.116	2.89565	2.9331	3.3706e-11	2.885e-12	AVR78_RS27625	amino acid ABC transporter permease
AVR78_RS27630	11.058	4.5503	1.2811	8.3577e-05	5.4719e-06	AVR78_RS27630	amino acid ABC transporter permease
AVR78_RS27635	22.116	3.72298	2.5706	8.7857e-11	7.3757e-12	AVR78_RS27635	amino acid ABC transporter ATP-binding protein
AVR78_RS27640	33.1741	6.61862	2.3255	6.4824e-15	6.4102e-16	AVR78_RS27640	EamA/RhaT family transporter
AVR78_RS27645	49.7611	14.0646	1.823	1.3172e-19	1.5723e-20	AVR78_RS27645	hypothetical protein
AVR78_RS27675	5.52901	0	3.7405	0.0006674	4.1749e-05	AVR78_RS27675	hypothetical protein
AVR78_RS27680	38.7031	11.1689	1.793	1.7327e-15	1.7517e-16	AVR78_RS27680	hypothetical protein
AVR78_RS27700	22.116	2.48198	3.1555	2.1384e-11	1.847e-12	AVR78_RS27700	hypothetical protein
AVR78_RS27730	88.4641	42.1937	1.0681	1.3721e-26	2.1051e-27	AVR78_RS27730	HNH endonuclease
AVR78_RS27740	27.645	5.37763	2.362	9.5338e-13	8.6752e-14	AVR78_RS27740	silver-binding protein SilE
AVR78_RS27750	93.9932	21.0969	2.1555	3.6032e-38	7.9909e-39	AVR78_RS27750	DNA-binding response regulator
AVR78_RS27755	27.645	9.92793	1.4775	1.2661e-10	1.0562e-11	AVR78_RS27755	hypothetical protein
AVR78_RS27770	127.167	33.0931	1.9421	7.5369e-49	2.4433e-49	AVR78_RS27770	CusA/CzcA family heavy metal efflux RND transporter
AVR78_RS27780	138.225	49.226	1.4895	4.575e-47	1.3886e-47	AVR78_RS27780	copper-translocating P-type ATPase
AVR78_RS27785	11.058	2.06832	2.4186	5.768e-06	3.9878e-07	AVR78_RS27785	DUF2933 domain-containing protein
AVR78_RS27790	38.7031	10.7553	1.8474	1.1162e-15	1.1366e-16	AVR78_RS27790	peptidase M23
AVR78_RS27800	44.2321	19.4422	1.1859	1.0886e-14	1.0701e-15	AVR78_RS27800	multicopper oxidase PcoA
AVR78_RS27805	66.3481	11.1689	2.5706	2.7438e-29	4.5982e-30	AVR78_RS27805	copper resistance protein B
AVR78_RS27810	5.52901	0	2.7405	0.0010401	6.4457e-05	AVR78_RS27810	copper resistance system chaperone PcoC
AVR78_RS27820	33.1741	10.7553	1.625	5.8685e-13	5.3841e-14	AVR78_RS27820	DNA-binding response regulator
AVR78_RS27825	49.7611	22.7515	1.1291	5.253e-16	5.4152e-17	AVR78_RS27825	sensor histidine kinase
AVR78_RS27830	33.1741	7.85961	2.0775	2.6604e-14	2.5857e-15	AVR78_RS27830	hypothetical protein
AVR78_RS27835	16.587	4.96397	1.7405	2.2774e-07	1.6878e-08	AVR78_RS27835	IS66 family transposase
AVR78_RS27845	11.058	0	3.7405	1.4939e-06	1.0597e-07	AVR78_RS27845	IS5/IS1182 family transposase
AVR78_RS27850	16.587	0	4.3255	3.3012e-09	2.6173e-10	AVR78_RS27850	IS5/IS1182 family transposase
AVR78_RS27860	33.1741	3.72298	3.1555	2.3799e-16	2.4831e-17	AVR78_RS27860	IS3 family transposase
AVR78_RS27875	49.7611	8.68694	2.5181	3.2229e-22	4.2274e-23	AVR78_RS27875	hypothetical protein
AVR78_RS27880	16.587	2.89565	2.5181	2.1894e-08	1.6872e-09	AVR78_RS27880	N-acetyltransferase
AVR78_RS27885	22.116	4.96397	2.1555	3.7134e-10	3.0502e-11	AVR78_RS27885	arsenate reductase (glutaredoxin)
AVR78_RS27890	16.587	5.7913	1.5181	5.3496e-07	3.8964e-08	AVR78_RS27890	arsenical efflux pump membrane protein ArsB
AVR78_RS27895	60.8191	9.51427	2.6764	2.3901e-27	3.7599e-28	AVR78_RS27895	arsenical pump-driving ATPase
AVR78_RS27915	82.9351	41.3664	1.0035	2.1854e-24	3.0882e-25	AVR78_RS27915	hypothetical protein
AVR78_RS27960	11.058	1.24099	3.1555	2.1911e-06	1.5396e-07	AVR78_RS27960	hypothetical protein
AVR78_RS27970	44.2321	10.7553	2.0401	2.0009e-18	2.2862e-19	AVR78_RS27970	PfkB domain-containing protein
AVR78_RS27975	11.058	4.13664	1.4186	5.6058e-05	3.7075e-06	AVR78_RS27975	SIS domain-containing protein
AVR78_RS27980	44.2321	9.92793	2.1555	7.9317e-19	9.2206e-20	AVR78_RS27980	ABC transporter substrate-binding protein
AVR78_RS28005	22.116	7.44595	1.5706	5.3764e-09	4.2288e-10	AVR78_RS28005	IS5/IS1182 family transposase
AVR78_RS28055	458.908	217.174	1.0794	3.7283e-131	5.817e-131	AVR78_RS28055	CPBP family intramembrane metalloprotease
AVR78_RS28115	392.56	173.325	1.1794	4.9388e-117	6.6886e-117	AVR78_RS28115	hypothetical protein
AVR78_RS28300	22.116	7.85961	1.4926	8.1199e-09	6.3473e-10	AVR78_RS28300	hypothetical protein
AVR78_RS28305	917.816	332.172	1.4663	1.1392e-299	4.8242e-299	AVR78_RS28305	hypothetical protein
AVR78_RS28310	1448.6	692.06	1.0657	0	0	AVR78_RS28310	hypothetical protein
AVR78_RS28315	375.973	174.566	1.1069	5.1402e-109	6.4687e-109	AVR78_RS28315	hypothetical protein
AVR78_RS28340	254.334	102.175	1.3157	2.2473e-80	1.6794e-80	AVR78_RS28340	conjugal transfer protein TraN
AVR78_RS28345	978.635	475.714	1.0407	5.6658e-273	2.0155e-272	AVR78_RS28345	hypothetical protein
AVR78_RS28405	66.3481	33.0931	1.0035	7.8927e-20	9.5153e-21	AVR78_RS28405	IS110 family transposase
AVR78_RS28415	25145.9	14.0646	10.804	0	0	AVR78_RS28415	integrase
AVR78_RS28455	38.7031	11.5826	1.7405	2.675e-15	2.684e-16	AVR78_RS28455	hypothetical protein
AVR78_RS28465	33.1741	11.9963	1.4675	2.0092e-12	1.8092e-13	AVR78_RS28465	resolvase
AVR78_RS28545	71.8771	23.9925	1.5829	5.7226e-26	8.6081e-27	AVR78_RS28545	hypothetical protein
AVR78_RS28575	38.7031	6.61862	2.5478	1.0618e-17	1.1799e-18	AVR78_RS28575	hypothetical protein
AVR78_RS28605	221.16	86.8694	1.3482	6.4514e-71	3.9119e-71	lacZ	beta-galactosidase
AVR78_RS28610	143.754	33.5068	2.1011	7.6395e-57	3.1502e-57	AVR78_RS28610	pyrroloquinoline quinone biosynthesis protein PqqF
AVR78_RS28630	514.198	167.948	1.6143	1.9301e-176	4.4013e-176	AVR78_RS28630	nitrite reductase (NAD(P)H)
AVR78_RS28635	143.754	69.9092	1.0401	1.1301e-41	2.8578e-42	AVR78_RS28635	hypothetical protein
AVR78_RS28640	22.116	9.51427	1.2169	3.8526e-08	2.9443e-09	AVR78_RS28640	hypothetical protein
AVR78_RS28650	88.4641	20.6832	2.0966	1.2653e-35	2.6028e-36	AVR78_RS28650	hypothetical protein
AVR78_RS28665	5.52901	2.06832	1.4186	0.0043884	0.00026376	AVR78_RS28665	hypothetical protein
AVR78_RS28675	99.5222	45.9167	1.116	2.8682e-30	4.9723e-31	AVR78_RS28675	hypothetical protein
AVR78_RS28680	22.116	7.03229	1.653	3.5261e-09	2.7915e-10	AVR78_RS28680	hypothetical protein
AVR78_RS28685	138.225	50.0533	1.4655	1.0106e-46	3.033e-47	AVR78_RS28685	hypothetical protein
AVR78_RS28690	16.587	5.37763	1.625	3.5129e-07	2.5804e-08	AVR78_RS28690	hypothetical protein
AVR78_RS28705	16.587	1.24099	3.7405	3.7801e-09	2.9864e-10	AVR78_RS28705	pilus assembly protein PilZ
AVR78_RS28710	55.2901	20.6832	1.4186	2.0826e-19	2.4639e-20	AVR78_RS28710	hypothetical protein
AVR78_RS28715	27.645	7.85961	1.8145	1.5306e-11	1.3301e-12	AVR78_RS28715	hypothetical protein
AVR78_RS28730	49.7611	18.2012	1.451	8.5532e-18	9.5559e-19	AVR78_RS28730	hypothetical protein
AVR78_RS28735	27.645	9.51427	1.5389	8.4252e-11	7.0954e-12	AVR78_RS28735	hypothetical protein
AVR78_RS28745	5.52901	2.48198	1.1555	0.0066046	0.00039236	AVR78_RS28745	hypothetical protein
AVR78_RS28750	16.587	6.61862	1.3255	1.1949e-06	8.5468e-08	AVR78_RS28750	hypothetical protein
AVR78_RS28765	77.4061	33.0931	1.2259	6.8615e-25	9.8368e-26	AVR78_RS28765	transposase
AVR78_RS28780	105.051	33.5068	1.6486	7.3719e-38	1.6214e-38	AVR78_RS28780	lipoprotein
AVR78_RS28790	77.4061	23.1652	1.7405	5.1227e-29	8.4889e-30	lacZ	beta-D-galactosidase
AVR78_RS28795	11.058	0	3.7405	1.4939e-06	1.0597e-07	AVR78_RS28795	response regulator
AVR78_RS28825	5.52901	2.48198	1.1555	0.0066046	0.00039236	AVR78_RS28825	K(+)-transporting ATPase subunit F

## Sheet: KEGG_up
Term	Sample number	Background number	P-value	Corrected P-value	UniGenes	KO	Entrez ID	Ensembl ID	Gene name
ABC transporters	119	274	3.49572e-10	3.00632e-08	AVR78_RS14890 AVR78_RS14895 AVR78_RS17765 AVR78_RS14370 AVR78_RS12215 AVR78_RS01965 AVR78_RS03715 AVR78_RS01310 AVR78_RS27580 AVR78_RS26290 AVR78_RS07025 AVR78_RS26355 AVR78_RS24975 AVR78_RS26690 AVR78_RS22350 AVR78_RS22355 AVR78_RS26695 AVR78_RS17975 AVR78_RS14885 AVR78_RS03720 AVR78_RS18435 AVR78_RS07755 AVR78_RS24960 AVR78_RS08100 AVR78_RS09750 AVR78_RS06585 AVR78_RS09120 AVR78_RS05745 AVR78_R…	kpr:KPR_1775 kpr:KPR_1773 kpr:KPR_5105 kpr:KPR_4157 kpr:KPR_1937 kpr:KPR_3610 kpr:KPR_3748 kpr:KPR_3723 kpr:KPR_1098 kpr:KPR_4051 kpr:KPR_3817 kpr:KPR_4041 kpr:KPR_4437 kpr:KPR_5014 kpr:KPR_0655 kpr:KPR_0656 kpr:KPR_3721 kpr:KPR_1477 kpr:KPR_1776 kpr:KPR_3749 kpr:KPR_4984 kpr:KPR_1145 kpr:KPR_4439 kpr:KPR_2628 kpr:KPR_3309 kpr:KPR_2429 kpr:KPR_1530 kpr:KPR_2510 kpr:KPR_2509 kpr:KPR_1477 kpr:KPR_3…	NA
Benzoate degradation	20	33	0.000480283	0.0206522	AVR78_RS19035 AVR78_RS05010 AVR78_RS06945 AVR78_RS07970 AVR78_RS05865 AVR78_RS07360 AVR78_RS04910 AVR78_RS20000 AVR78_RS08270 AVR78_RS08265 AVR78_RS05290 AVR78_RS06960 AVR78_RS06950 AVR78_RS06955 AVR78_RS07365 AVR78_RS06965 AVR78_RS06975 AVR78_RS13855 AVR78_RS15205 AVR78_RS08275	kpr:KPR_0060 kpr:KPR_3090 kpr:KPR_2933 kpr:KPR_3091 kpr:KPR_2541 kpr:KPR_2985 kpr:KPR_2867 kpr:KPR_0195 kpr:KPR_2663 kpr:KPR_2662 kpr:KPR_2771 kpr:KPR_2937 kpr:KPR_2934 kpr:KPR_2935 kpr:KPR_2986 kpr:KPR_2985 kpr:KPR_2939 kpr:KPR_0059 kpr:KPR_2541 kpr:KPR_2664	NA
Microbial metabolism in diverse environments	93	305	0.00251548	0.0721106	AVR78_RS19035 AVR78_RS08815 AVR78_RS28630 AVR78_RS04870 AVR78_RS02210 AVR78_RS19130 AVR78_RS04875 AVR78_RS15485 AVR78_RS01125 AVR78_RS26885 AVR78_RS26880 AVR78_RS18015 AVR78_RS19125 AVR78_RS01130 AVR78_RS00085 AVR78_RS21900 AVR78_RS21875 AVR78_RS06975 AVR78_RS21870 AVR78_RS08820 AVR78_RS06180 AVR78_RS21885 AVR78_RS06485 AVR78_RS19055 AVR78_RS04910 AVR78_RS14410 AVR78_RS13850 AVR78_RS06960 AVR78_R…	kpr:KPR_0060 kpr:KPR_3131 kpr:KPR_3139 kpr:KPR_2875 kpr:KPR_3511 kpr:KPR_0042 kpr:KPR_2874 kpr:KPR_4631 kpr:KPR_3760 kpr:KPR_3760 kpr:KPR_3759 kpr:KPR_2524 kpr:KPR_0043 kpr:KPR_3759 kpr:KPR_3941 kpr:KPR_0567 kpr:KPR_0562 kpr:KPR_2939 kpr:KPR_0561 kpr:KPR_3132 kpr:KPR_4851 kpr:KPR_0564 kpr:KPR_0928 kpr:KPR_0055 kpr:KPR_2867 kpr:KPR_4165 kpr:KPR_3941 kpr:KPR_2937 kpr:KPR_0059 kpr:KPR_2985 kpr:KPR_3…	NA
Nitrogen metabolism	14	24	0.00428021	0.0920244	AVR78_RS08820 AVR78_RS08825 AVR78_RS28630 AVR78_RS17460 AVR78_RS17465 AVR78_RS08860 AVR78_RS08845 AVR78_RS22385 AVR78_RS07015 AVR78_RS08870 AVR78_RS07000 AVR78_RS08810 AVR78_RS08815 AVR78_RS01665	kpr:KPR_3132 kpr:KPR_3133 kpr:KPR_3139 kpr:KPR_0718 kpr:KPR_0717 kpr:KPR_3140 kpr:KPR_3137 kpr:KPR_0662 kpr:KPR_3129 kpr:KPR_3142 kpr:KPR_3132 kpr:KPR_3130 kpr:KPR_3131 kpr:KPR_3673	NA
Degradation of aromatic compounds	17	35	0.00708166	0.101504	AVR78_RS15485 AVR78_RS06945 AVR78_RS05865 AVR78_RS06470 AVR78_RS20000 AVR78_RS08270 AVR78_RS06955 AVR78_RS08265 AVR78_RS08275 AVR78_RS06950 AVR78_RS08290 AVR78_RS07365 AVR78_RS07360 AVR78_RS06975 AVR78_RS06960 AVR78_RS15205 AVR78_RS06965	kpr:KPR_4631 kpr:KPR_2933 kpr:KPR_2541 kpr:KPR_0867 kpr:KPR_0195 kpr:KPR_2663 kpr:KPR_2935 kpr:KPR_2662 kpr:KPR_2664 kpr:KPR_2934 kpr:KPR_2668 kpr:KPR_2986 kpr:KPR_2985 kpr:KPR_2939 kpr:KPR_2937 kpr:KPR_2541 kpr:KPR_2985	NA
Phenylalanine metabolism	17	35	0.00708166	0.101504	AVR78_RS08270 AVR78_RS04890 AVR78_RS07970 AVR78_RS26395 AVR78_RS22930 AVR78_RS04910 AVR78_RS04870 AVR78_RS04880 AVR78_RS04915 AVR78_RS04875 AVR78_RS10305 AVR78_RS08265 AVR78_RS08275 AVR78_RS07105 AVR78_RS15485 AVR78_RS08290 AVR78_RS04635	kpr:KPR_2663 kpr:KPR_2871 kpr:KPR_3091 kpr:KPR_4035 kpr:KPR_2880 kpr:KPR_2867 kpr:KPR_2875 kpr:KPR_2873 kpr:KPR_2866 kpr:KPR_2874 kpr:KPR_1625 kpr:KPR_2662 kpr:KPR_2664 kpr:KPR_2634 kpr:KPR_4631 kpr:KPR_2668 kpr:KPR_0423	NA
Two-component system	40	118	0.0112561	0.138289	AVR78_RS10535 AVR78_RS15845 AVR78_RS10260 AVR78_RS03510 AVR78_RS27820 AVR78_RS27825 AVR78_RS08810 AVR78_RS08815 AVR78_RS20785 AVR78_RS16080 AVR78_RS22575 AVR78_RS06925 AVR78_RS06920 AVR78_RS22550 AVR78_RS22555 AVR78_RS07000 AVR78_RS12385 AVR78_RS19165 AVR78_RS09615 AVR78_RS21140 AVR78_RS09610 AVR78_RS03505 AVR78_RS05010 AVR78_RS00535 AVR78_RS00530 AVR78_RS22560 AVR78_RS08820 AVR78_RS04480 AVR78_R…	kpr:KPR_1574 kpr:KPR_4473 kpr:KPR_0324 kpr:KPR_2201 kpr:KPR_0803 kpr:KPR_0805 kpr:KPR_3130 kpr:KPR_3131 kpr:KPR_0321 kpr:KPR_4684 kpr:KPR_0805 kpr:KPR_2929 kpr:KPR_2928 kpr:KPR_0800 kpr:KPR_0801 kpr:KPR_3132 kpr:KPR_1901 kpr:KPR_0035 kpr:KPR_2759 kpr:KPR_0430 kpr:KPR_2911 kpr:KPR_2961 kpr:KPR_3090 kpr:KPR_3862 kpr:KPR_3863 kpr:KPR_0802 kpr:KPR_3132 kpr:KPR_4137 kpr:KPR_0978 kpr:KPR_0934 kpr:KPR_0…	NA
Phosphotransferase system (PTS)	26	69	0.0139297	0.14045	AVR78_RS19775 AVR78_RS16390 AVR78_RS14025 AVR78_RS21885 AVR78_RS26610 AVR78_RS25730 AVR78_RS21875 AVR78_RS26615 AVR78_RS23015 AVR78_RS13795 AVR78_RS19080 AVR78_RS23095 AVR78_RS06080 AVR78_RS14035 AVR78_RS14030 AVR78_RS02200 AVR78_RS23005 AVR78_RS19780 AVR78_RS23000 AVR78_RS03980 AVR78_RS03985 AVR78_RS13905 AVR78_RS13800 AVR78_RS13805 AVR78_RS14850 AVR78_RS19070	kpr:KPR_2458 kpr:KPR_1494 kpr:KPR_1213 kpr:KPR_0564 kpr:KPR_0885 kpr:KPR_1188 kpr:KPR_0562 kpr:KPR_0884 kpr:KPR_0885 kpr:KPR_1253 kpr:KPR_0050 kpr:KPR_0901 kpr:KPR_2586 kpr:KPR_1211 kpr:KPR_1212 kpr:KPR_1947 kpr:KPR_0883 kpr:KPR_2459 kpr:KPR_0882 kpr:KPR_2279 kpr:KPR_2280 kpr:KPR_1237 kpr:KPR_1252 kpr:KPR_1251 kpr:KPR_1784 kpr:KPR_0052	NA
Xylene degradation	7	9	0.0146982	0.14045	AVR78_RS08265 AVR78_RS08270 AVR78_RS06955 AVR78_RS06945 AVR78_RS06950 AVR78_RS06960 AVR78_RS08275	kpr:KPR_2662 kpr:KPR_2663 kpr:KPR_2935 kpr:KPR_2933 kpr:KPR_2934 kpr:KPR_2937 kpr:KPR_2664	NA
Pentose and glucuronate interconversions	13	28	0.0226407	0.178004	AVR78_RS10640 AVR78_RS16775 AVR78_RS23625 AVR78_RS14940 AVR78_RS23630 AVR78_RS22470 AVR78_RS16780 AVR78_RS19870 AVR78_RS18415 AVR78_RS14930 AVR78_RS10635 AVR78_RS19880 AVR78_RS05850	kpr:KPR_1556 kpr:KPR_4812 kpr:KPR_0985 kpr:KPR_1765 kpr:KPR_0986 kpr:KPR_0786 kpr:KPR_4813 kpr:KPR_0170 kpr:KPR_4988 kpr:KPR_2289 kpr:KPR_1557 kpr:KPR_0172 kpr:KPR_2538	NA
Fructose and mannose metabolism	19	48	0.022768	0.178004	AVR78_RS22470 AVR78_RS19870 AVR78_RS13795 AVR78_RS13810 AVR78_RS13805 AVR78_RS03030 AVR78_RS14430 AVR78_RS14425 AVR78_RS13800 AVR78_RS16385 AVR78_RS03055 AVR78_RS11240 AVR78_RS27970 AVR78_RS14410 AVR78_RS10640 AVR78_RS16390 AVR78_RS19770 AVR78_RS19880 AVR78_RS14040	kpr:KPR_0786 kpr:KPR_0170 kpr:KPR_1253 kpr:KPR_1250 kpr:KPR_1251 kpr:KPR_2161 kpr:KPR_4168 kpr:KPR_4167 kpr:KPR_1252 kpr:KPR_3102 kpr:KPR_2168 kpr:KPR_2060 kpr:KPR_4044 kpr:KPR_4165 kpr:KPR_1556 kpr:KPR_1494 kpr:KPR_0182 kpr:KPR_0172 kpr:KPR_1210	NA
Butanoate metabolism	18	47	0.0329516	0.236153	AVR78_RS04560 AVR78_RS15450 AVR78_RS05010 AVR78_RS02185 AVR78_RS07970 AVR78_RS17835 AVR78_RS07990 AVR78_RS04910 AVR78_RS13390 AVR78_RS02210 AVR78_RS04105 AVR78_RS07980 AVR78_RS08270 AVR78_RS02230 AVR78_RS08000 AVR78_RS07955 AVR78_RS22665 AVR78_RS27020	kpr:KPR_3097 kpr:KPR_4624 kpr:KPR_3090 kpr:KPR_3729 kpr:KPR_3091 kpr:KPR_5093 kpr:KPR_3095 kpr:KPR_2867 kpr:KPR_0032 kpr:KPR_3511 kpr:KPR_2305 kpr:KPR_3093 kpr:KPR_2663 kpr:KPR_3507 kpr:KPR_3097 kpr:KPR_3088 kpr:KPR_0821 kpr:KPR_3097	NA

## Sheet: PAKP_KPvsKP.DEG_down
Supplementary Dataset 4. Significantly differentially expressed genes of K. pneumoniae when statically cocultured with P. aeruginosa in LB broth for 3 days compared to 1 day.
Gene_id	readcount_PAKP_KP	readcount_KP	log2.Fold_change.	pvalue	qvalue	Gene_name	Gene_description
AVR78_RS00030	99.5222	731.358	-2.8775	6.3299e-31	1.1177e-31	AVR78_RS00030	methylthioribose kinase
AVR78_RS00035	88.4641	191.94	-1.1175	0.012364	0.00072196	AVR78_RS00035	S-methyl-5-thioribose-1-phosphate isomerase
AVR78_RS00155	320.683	2821.6	-3.1373	3.549e-148	6.4853e-148	AVR78_RS00155	alkyl hydroperoxide reductase subunit C
AVR78_RS00160	259.863	557.619	-1.1015	9.0136e-06	6.1947e-07	AVR78_RS00160	alkyl hydroperoxide reductase subunit F
AVR78_RS00165	38.7031	2024.88	-5.7092	9.3381e-294	3.7184e-293	AVR78_RS00165	universal stress protein UspG
AVR78_RS00170	11.058	370.643	-5.0669	1.0935e-49	3.624e-50	AVR78_RS00170	nucleoside diphosphate kinase regulator
AVR78_RS00185	143.754	301.561	-1.0688	0.0004149	2.6224e-05	AVR78_RS00185	phospholipid:lipid A palmitoyltransferase
AVR78_RS00190	82.9351	7013.26	-6.402	0	0	AVR78_RS00190	cold-shock protein
AVR78_RS00205	55.2901	501.774	-3.1819	7.4861e-29	1.2329e-29	tatE	twin-arginine translocase subunit TatA
AVR78_RS00210	55.2901	424.833	-2.9418	6.7002e-20	8.1107e-21	AVR78_RS00210	lipoyl synthase
AVR78_RS00225	22.116	551	-4.6389	1.4298e-65	7.7378e-66	AVR78_RS00225	hypothetical protein
AVR78_RS00230	82.9351	382.639	-2.2059	2.6726e-06	1.8749e-07	AVR78_RS00230	serine-type D-Ala-D-Ala carboxypeptidase
AVR78_RS00235	82.9351	194.836	-1.2322	0.073062	0.0040703	AVR78_RS00235	endolytic peptidoglycan transglycosylase RlpA
AVR78_RS00250	16.587	91.8334	-2.469	0.0022206	0.00013579	AVR78_RS00250	23S rRNA (pseudouridine(1915)-N(3))-methyltransferase RlmH
AVR78_RS00255	5.52901	165.466	-4.9034	2.613e-22	3.4341e-23	AVR78_RS00255	ribosome silencing factor RsfS
AVR78_RS00265	5.52901	43.4347	-2.9738	0.0029807	0.00018111	AVR78_RS00265	nicotinate-nucleotide adenylyltransferase
AVR78_RS00275	33.1741	223.792	-2.754	2.9728e-09	2.3626e-10	AVR78_RS00275	LPS assembly lipoprotein LptE
AVR78_RS00280	221.16	1476.78	-2.7393	1.6459e-51	5.8083e-52	AVR78_RS00280	leucine--tRNA ligase
AVR78_RS00285	204.573	1088.76	-2.412	1.6765e-23	2.3031e-24	AVR78_RS00285	hypothetical protein
AVR78_RS00310	5.52901	40.9527	-2.8889	0.0058934	0.00035159	AVR78_RS00310	glutamate/aspartate transporter permease GltK
AVR78_RS00320	88.4641	356.165	-2.0094	0.00092419	5.7516e-05	AVR78_RS00320	glutamate/aspartate ABC transporter substrate-binding protein
AVR78_RS00330	93.9932	323.485	-1.7831	0.086183	0.0047783	AVR78_RS00330	magnesium/cobalt transporter CorC
AVR78_RS00340	88.4641	369.402	-2.062	0.00020379	1.3108e-05	AVR78_RS00340	PhoH family protein
AVR78_RS00345	121.638	449.653	-1.8862	0.0048842	0.00029309	AVR78_RS00345	tRNA (N6-isopentenyl adenosine(37)-C2)-methylthiotransferase MiaB
AVR78_RS00430	138.225	956.391	-2.7906	3.7292e-36	7.8033e-37	AVR78_RS00430	glutamine--tRNA ligase
AVR78_RS00475	71.8771	918.748	-3.6761	1.9545e-72	1.2386e-72	AVR78_RS00475	ferric iron uptake transcriptional regulator
AVR78_RS00480	93.9932	773.552	-3.0409	1.8744e-38	4.2129e-39	AVR78_RS00480	flavodoxin
AVR78_RS00485	0	53.3626	-6.7378	5.6108e-10	4.5876e-11	AVR78_RS00485	LexA regulated protein
AVR78_RS00500	127.167	287.083	-1.1747	0.0089429	0.00052716	AVR78_RS00500	replication initiation negative regulator SeqA
AVR78_RS00505	176.928	812.022	-2.1984	1.2781e-11	1.1165e-12	AVR78_RS00505	alpha-D-glucose phosphate-specific phosphoglucomutase
AVR78_RS00545	116.109	1579.37	-3.7658	1.6676e-129	2.5717e-129	AVR78_RS00545	DUF2517 domain-containing protein
AVR78_RS00595	116.109	2061.29	-4.15	3.705e-202	9.5045e-202	AVR78_RS00595	citrate (Si)-synthase
AVR78_RS00610	66.3481	1016.79	-3.9378	1.0745e-91	1.0059e-91	sdhC	succinate dehydrogenase cytochrome b556 subunit
AVR78_RS00615	0	132.372	-8.0485	1.9795e-22	2.6184e-23	AVR78_RS00615	succinate:quinone oxidoreductase subunit D
AVR78_RS00620	248.805	2043.09	-3.0377	2.5115e-98	2.6484e-98	AVR78_RS00620	succinate dehydrogenase flavoprotein subunit
AVR78_RS00625	110.58	1187.22	-3.4244	2.3463e-79	1.715e-79	sdhB	succinate dehydrogenase iron-sulfur subunit
AVR78_RS00630	265.392	6032.87	-4.5066	0	0	AVR78_RS00630	2-oxoglutarate dehydrogenase E1 component
AVR78_RS00635	116.109	2067.49	-4.1543	4.0048e-203	1.0475e-202	AVR78_RS00635	dihydrolipoyllysine-residue succinyltransferase
AVR78_RS00640	82.9351	1960.35	-4.563	3.5859e-223	1.0287e-222	AVR78_RS00640	succinyl-CoA ligase subunit beta
AVR78_RS00645	121.638	1865.21	-3.9387	1.1585e-166	2.4927e-166	AVR78_RS00645	succinate--CoA ligase subunit alpha
AVR78_RS00650	49.7611	2516.32	-5.6602	0	0	AVR78_RS00650	cytochrome bd-I ubiquinol oxidase subunit I
AVR78_RS00655	132.696	1199.21	-3.1759	3.278e-66	1.7958e-66	AVR78_RS00655	cytochrome d ubiquinol oxidase subunit 2
AVR78_RS00675	38.7031	235.375	-2.6044	4.3011e-08	3.2795e-09	AVR78_RS00675	Tol-Pal system subunit TolQ
AVR78_RS00680	27.645	110.448	-1.9983	0.071095	0.0039648	AVR78_RS00680	colicin transporter
AVR78_RS00690	127.167	1046.98	-3.0414	1.8559e-51	6.541e-52	AVR78_RS00690	Tol-Pal system protein TolB
AVR78_RS00695	11.058	1041.61	-6.5576	5.9226e-164	1.2345e-163	AVR78_RS00695	peptidoglycan-associated lipoprotein
AVR78_RS00700	27.645	342.514	-3.6311	2.1614e-27	3.4061e-28	AVR78_RS00700	cell division protein CpoB
AVR78_RS00705	0	162.156	-8.3412	9.0716e-27	1.4047e-27	AVR78_RS00705	tRNA-Lys
AVR78_RS00730	0	17.7875	-5.1528	0.0010519	6.5175e-05	AVR78_RS00730	tRNA-Lys
AVR78_RS00750	66.3481	137.75	-1.0539	0.013563	0.00078897	AVR78_RS00750	quinolinate synthase NadA
AVR78_RS00765	27.645	238.684	-3.11	9.81e-14	9.2909e-15	AVR78_RS00765	hypothetical protein
AVR78_RS00775	149.283	1163.22	-2.962	1.0889e-52	4.0014e-53	gpmA	2%2C3-bisphosphoglycerate-dependent phosphoglycerate mutase
AVR78_RS00795	105.051	251.094	-1.2571	0.062964	0.003518	AVR78_RS00795	UDP-glucose 4-epimerase GalE
AVR78_RS00840	27.645	119.549	-2.1125	0.021722	0.0012471	AVR78_RS00840	Cof-type HAD-IIB family hydrolase
AVR78_RS00845	221.16	472.404	-1.0949	3.2805e-05	2.2007e-06	AVR78_RS00845	6-phosphogluconolactonase
AVR78_RS00860	38.7031	162.57	-2.0705	0.012418	0.00072497	AVR78_RS00860	two-component-system connector protein YcgZ
AVR78_RS00865	182.457	373.539	-1.0337	2.1263e-05	1.4394e-06	AVR78_RS00865	hypothetical protein
AVR78_RS00870	143.754	708.193	-2.3005	7.5199e-13	6.8661e-14	AVR78_RS00870	helix-turn-helix-type transcriptional regulator
AVR78_RS00890	88.4641	183.253	-1.0507	0.0041279	0.00024883	AVR78_RS00890	hypothetical protein
AVR78_RS00940	160.341	363.197	-1.1796	0.003751	0.00022672	AVR78_RS00940	urocanate hydratase
AVR78_RS00955	38.7031	146.437	-1.9198	0.080219	0.0044579	AVR78_RS00955	kinase inhibitor
AVR78_RS00975	0	13.2372	-4.7265	0.0072658	0.00043048	AVR78_RS00975	malonyl-[acyl-carrier protein] O-methyltransferase BioC
AVR78_RS01075	99.5222	568.374	-2.5138	2.4835e-15	2.496e-16	AVR78_RS01075	membrane protein
AVR78_RS01095	49.7611	103.416	-1.0554	0.033007	0.0018733	AVR78_RS01095	secretion protein HlyD
AVR78_RS01100	16.587	93.0744	-2.4883	0.0017305	0.00010632	AVR78_RS01100	transcriptional regulator
AVR78_RS01135	77.4061	360.301	-2.2187	3.6253e-06	2.53e-07	AVR78_RS01135	ATP-dependent RNA helicase RhlE
AVR78_RS01185	38.7031	166.293	-2.1032	0.0076378	0.00045202	AVR78_RS01185	glutamine ABC transporter permease GlnP
AVR78_RS01190	143.754	1110.69	-2.9498	9.189e-50	3.053e-50	AVR78_RS01190	glutamine ABC transporter substrate-binding protein GlnH
AVR78_RS01195	116.109	1424.24	-3.6166	2.0165e-107	2.4501e-107	AVR78_RS01195	DNA starvation/stationary phase protection protein Dps
AVR78_RS01200	71.8771	149.746	-1.0589	0.010928	0.00064019	AVR78_RS01200	threonine/homoserine exporter RhtA
AVR78_RS01210	77.4061	6086.24	-6.297	0	0	ompX	outer membrane protein X
AVR78_RS01220	16.587	303.629	-4.1942	7.2852e-32	1.3168e-32	AVR78_RS01220	Mn(2+)-response protein MntS
AVR78_RS01245	38.7031	351.201	-3.1818	1.1206e-20	1.3925e-21	AVR78_RS01245	L%2CD-transpeptidase
AVR78_RS01255	215.631	1557.44	-2.8525	3.9033e-62	1.8629e-62	AVR78_RS01255	ABC-F family ATPase
AVR78_RS01345	66.3481	4005.09	-5.9156	0	0	bssR	biofilm formation regulatory protein BssR
AVR78_RS01350	237.747	1282.77	-2.4318	2.1633e-28	3.4937e-29	AVR78_RS01350	PQQ-dependent sugar dehydrogenase
AVR78_RS01360	116.109	687.923	-2.5668	9.4465e-20	1.1322e-20	AVR78_RS01360	serine-type D-Ala-D-Ala carboxypeptidase
AVR78_RS01365	27.645	194.008	-2.811	1.0303e-08	8.0113e-10	AVR78_RS01365	DNA-binding transcriptional repressor DeoR
AVR78_RS01370	5.52901	49.6397	-3.1664	0.00049813	3.1374e-05	AVR78_RS01370	undecaprenyl-diphosphate phosphatase
AVR78_RS01390	110.58	251.094	-1.1831	0.017104	0.000989	AVR78_RS01390	MFS transporter
AVR78_RS01405	105.051	253.99	-1.2737	0.079448	0.0044177	AVR78_RS01405	hypothetical protein
AVR78_RS01520	77.4061	168.361	-1.121	0.020257	0.001166	AVR78_RS01520	GrxA family glutaredoxin
AVR78_RS01540	77.4061	181.598	-1.2302	0.081452	0.0045254	AVR78_RS01540	YbjN domain-containing protein
AVR78_RS01600	66.3481	137.75	-1.0539	0.013563	0.00078897	AVR78_RS01600	arginine ABC transporter substrate-binding protein
AVR78_RS01605	38.7031	202.282	-2.3858	2.7171e-05	1.8301e-06	AVR78_RS01605	arginine ABC transporter ATP-binding protein ArtP
AVR78_RS01610	16.587	216.76	-3.708	1.1094e-18	1.2847e-19	AVR78_RS01610	lipoprotein
AVR78_RS01615	16.587	618.014	-5.2195	3.3585e-84	2.7741e-84	AVR78_RS01615	DUF1471 domain-containing protein
AVR78_RS01695	33.1741	2117.96	-5.9965	0	0	AVR78_RS01695	cold-shock protein
AVR78_RS01700	143.754	751.627	-2.3864	5.7816e-16	5.9533e-17	AVR78_RS01700	ATP-dependent Clp protease adaptor ClpS
AVR78_RS01705	287.508	3546.75	-3.6248	5.9408e-266	2.032e-265	AVR78_RS01705	ATP-dependent Clp protease ATP-binding subunit ClpA
AVR78_RS01710	27.645	527.008	-4.2527	2.9214e-55	1.153e-55	AVR78_RS01710	translation initiation factor IF-1
AVR78_RS01720	55.2901	213.864	-1.9516	0.022804	0.0013075	AVR78_RS01720	cysteine/glutathione ABC transporter ATP-binding protein/permease CydC
AVR78_RS01730	93.9932	387.189	-2.0424	0.00023924	1.5314e-05	AVR78_RS01730	thioredoxin-disulfide reductase
AVR78_RS01740	88.4641	842.22	-3.251	5.3178e-50	1.7779e-50	AVR78_RS01740	leucine-responsive regulatory protein
AVR78_RS01745	210.102	1042.43	-2.3108	1.3672e-18	1.575e-19	AVR78_RS01745	DNA translocase FtsK
AVR78_RS01750	16.587	734.253	-5.4682	4.045e-104	4.5728e-104	lolA	outer membrane lipoprotein carrier protein LolA
AVR78_RS01755	82.9351	414.078	-2.3198	2.1254e-08	1.6398e-09	AVR78_RS01755	replication-associated recombination protein A
AVR78_RS01760	110.58	1015.96	-3.1997	1.6787e-57	7.0642e-58	AVR78_RS01760	serine--tRNA ligase
AVR78_RS01790	49.7611	706.124	-3.8268	7.6801e-61	3.5573e-61	pflA	pyruvate formate lyase 1-activating protein
AVR78_RS01795	204.573	2100.17	-3.3598	1.2928e-132	2.0778e-132	AVR78_RS01795	formate C-acetyltransferase
AVR78_RS01800	121.638	498.879	-2.0361	3.7481e-05	2.5074e-06	AVR78_RS01800	formate transporter FocA
AVR78_RS01825	182.457	392.567	-1.1054	0.00022491	1.4428e-05	AVR78_RS01825	(d)CMP kinase
AVR78_RS01830	121.638	6433.3	-5.7249	0	0	AVR78_RS01830	30S ribosomal protein S1
AVR78_RS01835	16.587	941.085	-5.8262	1.2466e-139	2.1457e-139	AVR78_RS01835	integration host factor subunit beta
AVR78_RS01845	160.341	561.756	-1.8088	0.012954	0.00075511	AVR78_RS01845	lipid A ABC transporter ATP-binding protein/permease MsbA
AVR78_RS01860	0	7.85961	-3.9745	0.071692	0.0039948	AVR78_RS01860	hypothetical protein
AVR78_RS01865	60.8191	367.747	-2.5961	1.0177e-11	8.9168e-13	AVR78_RS01865	3-deoxy-manno-octulosonate cytidylyltransferase
AVR78_RS01910	44.2321	297.424	-2.7494	9.1522e-12	8.0427e-13	AVR78_RS01910	DUF882 domain-containing protein
AVR78_RS01920	143.754	802.922	-2.4817	5.7256e-20	6.9593e-21	AVR78_RS01920	aspartate/tyrosine/aromatic aminotransferase
AVR78_RS01930	132.696	712.743	-2.4253	2.7001e-16	2.8118e-17	AVR78_RS01930	asparagine--tRNA ligase
AVR78_RS01945	293.037	709.847	-1.2764	0.0037272	0.00022538	AVR78_RS01945	aminopeptidase N
AVR78_RS01980	60.8191	395.463	-2.7009	2.6695e-14	2.5936e-15	AVR78_RS01980	cell division protein ZapC
AVR78_RS01990	204.573	434.761	-1.0876	5.0022e-05	3.3198e-06	AVR78_RS01990	bifunctional 23S rRNA (guanine(2069)-N(7))-methyltransferase RlmK/23S rRNA (guanine(2445)-N(2))-methyltransferase RlmL
AVR78_RS02020	60.8191	1505.74	-4.6298	2.1196e-175	4.7923e-175	AVR78_RS02020	ribosome modulation factor
AVR78_RS02025	66.3481	370.229	-2.4803	5.4767e-10	4.4793e-11	AVR78_RS02025	bifunctional 3-hydroxydecanoyl-ACP dehydratase/trans-2-decenoyl-ACP isomerase
AVR78_RS02030	121.638	452.962	-1.8968	0.0036755	0.00022246	AVR78_RS02030	Lon protease family protein
AVR78_RS02035	132.696	552.655	-2.0583	6.3711e-06	4.4013e-07	AVR78_RS02035	macrodomain Ter protein
AVR78_RS02040	348.328	10696.1	-4.9405	0	0	AVR78_RS02040	porin OmpA
AVR78_RS02045	22.116	240.339	-3.4419	1.3658e-17	1.5107e-18	AVR78_RS02045	cell division inhibitor SulA
AVR78_RS02060	82.9351	196.904	-1.2474	0.087848	0.0048686	AVR78_RS02060	TIGR01666 family membrane protein
AVR78_RS02065	38.7031	177.048	-2.1936	0.0016823	0.00010354	AVR78_RS02065	YccF domain-containing protein
AVR78_RS02075	33.1741	131.131	-1.9829	0.056608	0.0031762	AVR78_RS02075	methylglyoxal synthase
AVR78_RS02080	182.457	850.079	-2.22	1.0202e-12	9.274e-14	AVR78_RS02080	CoA-binding protein
AVR78_RS02085	60.8191	320.176	-2.3963	9.5998e-08	7.2268e-09	AVR78_RS02085	heat-shock protein HspQ
AVR78_RS02115	116.109	2046.4	-4.1395	7.6739e-200	1.9499e-199	AVR78_RS02115	transmembrane protein
AVR78_RS02290	71.8771	150.574	-1.0669	0.012211	0.00071349	AVR78_RS02290	transcriptional regulator
AVR78_RS02495	5.52901	57.4993	-3.3785	4.4712e-05	2.9771e-06	AVR78_RS02495	bacteriophage regulatory protein
AVR78_RS02500	71.8771	284.187	-1.9832	0.0049772	0.00029847	AVR78_RS02500	hypothetical protein
AVR78_RS02510	27.645	215.519	-2.9627	4.7948e-11	4.0727e-12	AVR78_RS02510	hypothetical protein
AVR78_RS02515	82.9351	888.136	-3.4207	1.1285e-59	5.103e-60	AVR78_RS02515	NAD(P)H:quinone oxidoreductase
AVR78_RS02590	304.096	1187.63	-1.9655	3.1643e-08	2.4245e-09	putA	trifunctional transcriptional regulator/proline dehydrogenase/L-glutamate gamma-semialdehyde dehydrogenase
AVR78_RS02630	60.8191	510.461	-3.0692	1.2758e-26	1.9629e-27	AVR78_RS02630	phosphate starvation protein PhoH
AVR78_RS02670	66.3481	288.324	-2.1196	0.00031371	1.997e-05	AVR78_RS02670	phosphatase
AVR78_RS02675	16.587	187.39	-3.4979	1.524e-14	1.4915e-15	AVR78_RS02675	molecular chaperone
AVR78_RS02705	171.399	1255.88	-2.8733	1.2412e-51	4.4093e-52	mdoG	glucans biosynthesis protein MdoG
AVR78_RS02720	22.116	105.071	-2.2482	0.0094372	0.00055593	AVR78_RS02720	SecY/SecA suppressor protein
AVR78_RS02755	105.051	233.72	-1.1537	0.012225	0.00071419	AVR78_RS02755	N-methyl-L-tryptophan oxidase
AVR78_RS02760	27.645	5130.26	-7.5359	0	0	bssS	biofilm formation regulatory protein BssS
AVR78_RS02780	71.8771	476.127	-2.7277	1.7932e-17	1.9744e-18	AVR78_RS02780	lipoprotein
AVR78_RS02795	55.2901	282.532	-2.3533	1.6158e-06	1.1444e-07	AVR78_RS02795	DUF480 domain-containing protein
AVR78_RS02800	138.225	337.963	-1.2898	0.058374	0.0032718	AVR78_RS02800	gfo/Idh/MocA family oxidoreductase
AVR78_RS02840	121.638	1142.13	-3.2311	4.2612e-66	2.3296e-66	AVR78_RS02840	23S rRNA accumulation protein YceD
AVR78_RS02845	11.058	210.141	-4.2482	5.163e-23	6.9993e-24	AVR78_RS02845	50S ribosomal protein L32
AVR78_RS02860	55.2901	289.978	-2.3909	4.4381e-07	3.2413e-08	AVR78_RS02860	[acyl-carrier-protein] S-malonyltransferase
AVR78_RS02865	66.3481	917.92	-3.7902	4.6702e-77	3.2703e-77	fabG	3-oxoacyl-ACP reductase FabG
AVR78_RS02870	38.7031	2041.02	-5.7207	1.5941e-296	6.5429e-296	AVR78_RS02870	acyl carrier protein
AVR78_RS02875	44.2321	1141.3	-4.6894	9.4807e-136	1.5711e-135	AVR78_RS02875	beta-ketoacyl-[acyl-carrier-protein] synthase II
AVR78_RS02905	93.9932	934.467	-3.3135	5.1208e-58	2.1894e-58	AVR78_RS02905	PTS glucose transporter subunit IIBC
AVR78_RS02920	27.645	117.894	-2.0924	0.027277	0.0015587	AVR78_RS02920	penicillin-binding protein activator LpoB
AVR78_RS02935	55.2901	591.953	-3.4204	2.363e-40	5.7001e-41	AVR78_RS02935	hypothetical protein
AVR78_RS02965	55.2901	252.335	-2.1902	0.00018911	1.219e-05	AVR78_RS02965	TetR/AcrR family transcriptional regulator
AVR78_RS02975	49.7611	563.824	-3.5022	1.1689e-40	2.8479e-41	AVR78_RS02975	DUF1471 domain-containing protein
AVR78_RS02980	66.3481	591.126	-3.1553	5.9317e-33	1.1264e-33	AVR78_RS02980	peptidoglycan-binding protein LysM
AVR78_RS02985	210.102	833.119	-1.9874	1.2293e-06	8.7786e-08	AVR78_RS02985	transcription-repair coupling factor
AVR78_RS02995	88.4641	188.217	-1.0892	0.0078672	0.00046478	AVR78_RS02995	lipoprotein-releasing system transmembrane subunit LolC
AVR78_RS03025	82.9351	486.469	-2.5523	4.0419e-14	3.8929e-15	AVR78_RS03025	SorC family transcriptional regulator
AVR78_RS03100	165.87	702.401	-2.0822	1.1573e-07	8.6753e-09	AVR78_RS03100	peptidase T
AVR78_RS03105	99.5222	440.138	-2.1449	3.7425e-06	2.6104e-07	AVR78_RS03105	cupin domain-containing protein
AVR78_RS03130	82.9351	441.379	-2.412	2.0184e-10	1.6729e-11	AVR78_RS03130	adenylosuccinate lyase
AVR78_RS03135	16.587	165.052	-3.3148	1.471e-11	1.2805e-12	AVR78_RS03135	lysogenization protein HflD
AVR78_RS03140	60.8191	533.626	-3.1332	2.3433e-29	3.932e-30	AVR78_RS03140	tRNA 2-thiouridine(34) synthase MnmA
AVR78_RS03150	60.8191	237.857	-1.9675	0.012924	0.00075353	AVR78_RS03150	23S rRNA pseudouridine(2457) synthase RluE
AVR78_RS03155	187.986	3861.97	-4.3606	0	0	AVR78_RS03155	isocitrate dehydrogenase (NADP(+))
AVR78_RS03205	88.4641	409.527	-2.2108	1.0197e-06	7.3115e-08	AVR78_RS03205	helix-turn-helix transcriptional regulator
AVR78_RS03250	82.9351	2831.94	-5.0937	0	0	AVR78_RS03250	hypothetical protein
AVR78_RS03255	55.2901	2522.52	-5.5117	0	0	AVR78_RS03255	hypothetical protein
AVR78_RS03370	11.058	63.7042	-2.5263	0.0074172	0.00043926	AVR78_RS03370	hypothetical protein
AVR78_RS03465	143.754	803.335	-2.4824	5.2989e-20	6.4582e-21	AVR78_RS03465	GntR family transcriptional regulator
AVR78_RS03520	0	12.4099	-4.6334	0.010336	0.0006066	AVR78_RS03520	hypothetical protein
AVR78_RS03550	199.044	421.524	-1.0825	5.2961e-05	3.5088e-06	AVR78_RS03550	LysR family transcriptional regulator
AVR78_RS03575	237.747	495.156	-1.0585	3.5988e-06	2.5121e-07	AVR78_RS03575	lipid A biosynthesis lauroyl (or palmitoleoyl) acyltransferase
AVR78_RS03585	44.2321	287.083	-2.6983	9.4867e-11	7.9566e-12	AVR78_RS03585	DUF2534 domain-containing protein
AVR78_RS03595	22.116	107.553	-2.2819	0.0062501	0.00037205	AVR78_RS03595	hypothetical protein
AVR78_RS03605	33.1741	432.692	-3.7052	1.2826e-35	2.6362e-36	AVR78_RS03605	sensor domain-containing diguanylate cyclase
AVR78_RS03760	71.8771	435.588	-2.5994	1.14e-13	1.0758e-14	AVR78_RS03760	hypothetical protein
AVR78_RS03765	232.218	1217.41	-2.3903	4.5693e-25	6.6218e-26	AVR78_RS03765	PrkA family serine protein kinase
AVR78_RS03770	171.399	725.567	-2.0817	7.3483e-08	5.5569e-09	AVR78_RS03770	MipA/OmpV family protein
AVR78_RS03785	193.515	5466.57	-4.8201	0	0	AVR78_RS03785	glyceraldehyde-3-phosphate dehydrogenase
AVR78_RS03790	60.8191	356.165	-2.5499	1.0753e-10	8.9986e-12	AVR78_RS03790	peptide-methionine (R)-S-oxide reductase
AVR78_RS03800	33.1741	194.008	-2.548	1.9641e-06	1.3844e-07	AVR78_RS03800	HNH endonuclease
AVR78_RS03815	27.645	176.635	-2.6757	5.7472e-07	4.1757e-08	AVR78_RS03815	L-asparaginase 1
AVR78_RS03825	33.1741	321.831	-3.2782	1.5198e-20	1.8798e-21	AVR78_RS03825	NAD(P)H nitroreductase
AVR78_RS03835	88.4641	670.549	-2.9222	7.2211e-30	1.2334e-30	AVR78_RS03835	phosphatase PAP2 family protein
AVR78_RS03840	60.8191	387.189	-2.6704	1.6423e-13	1.5425e-14	AVR78_RS03840	selenide%2C water dikinase SelD
AVR78_RS03950	38.7031	824.846	-4.4136	1.4925e-90	1.3637e-90	AVR78_RS03950	ATP-independent periplasmic protein-refolding chaperone
AVR78_RS03955	16.587	287.91	-4.1175	2.1174e-29	3.5642e-30	AVR78_RS03955	excinuclease Cho
AVR78_RS03960	88.4641	411.182	-2.2166	8.0209e-07	5.7774e-08	AVR78_RS03960	ammonia-dependent NAD(+) synthetase
AVR78_RS03965	71.8771	2556.86	-5.1527	0	0	AVR78_RS03965	DNA-binding transcriptional activator OsmE
AVR78_RS04030	93.9932	202.695	-1.1087	0.0085659	0.00050516	AVR78_RS04030	2-deoxyglucose-6-phosphatase
AVR78_RS04040	38.7031	82.3191	-1.0888	0.078493	0.0043655	AVR78_RS04040	acyl-CoA thioester hydrolase YciA
AVR78_RS04050	16.587	143.541	-3.1133	7.4216e-09	5.8117e-10	AVR78_RS04050	septation protein A
AVR78_RS04055	27.645	207.659	-2.9091	3.5715e-10	2.9346e-11	AVR78_RS04055	UPF0259 family protein
AVR78_RS04065	149.283	1319.59	-3.144	1.057e-70	6.3514e-71	AVR78_RS04065	outer membrane protein OmpW
AVR78_RS04115	16.587	81.9055	-2.3039	0.014397	0.00083611	AVR78_RS04115	tryptophan synthase subunit alpha
AVR78_RS04125	77.4061	177.875	-1.2003	0.057027	0.003199	AVR78_RS04125	bifunctional indole-3-glycerol-phosphate synthase TrpC/phosphoribosylanthranilate isomerase TrpF
AVR78_RS04145	116.109	395.049	-1.7665	0.07592	0.0042242	AVR78_RS04145	hypothetical protein
AVR78_RS04160	60.8191	496.397	-3.0289	5.3741e-25	7.7627e-26	AVR78_RS04160	23S rRNA pseudouridine(2605) synthase RluB
AVR78_RS04185	33.1741	795.062	-4.5829	3.0689e-92	2.9242e-92	AVR78_RS04185	hypothetical protein
AVR78_RS04195	0	15.3056	-4.936	0.0030137	0.00018306	AVR78_RS04195	hypothetical protein
AVR78_RS04200	381.502	1334.07	-1.8061	0.00014829	9.6146e-06	AVR78_RS04200	type I DNA topoisomerase
AVR78_RS04205	138.225	2511.35	-4.1834	3.0079e-249	9.5534e-249	AVR78_RS04205	LysR family transcriptional regulator CysB
AVR78_RS04210	5.52901	1289.39	-7.8655	2.1459e-204	5.7252e-204	AVR78_RS04210	YmiA family putative membrane protein
AVR78_RS04225	110.58	742.94	-2.7482	4.7623e-27	7.4258e-28	AVR78_RS04225	GTP cyclohydrolase II
AVR78_RS04230	49.7611	233.306	-2.2291	0.00015859	1.0265e-05	AVR78_RS04230	phosphatidylglycerophosphatase B
AVR78_RS04235	27.645	154.71	-2.4845	5.6818e-05	3.7568e-06	AVR78_RS04235	DUF1049 domain-containing protein
AVR78_RS04240	215.631	439.311	-1.0267	2.8597e-06	2.0025e-07	AVR78_RS04240	lipopolysaccharide assembly protein LapB
AVR78_RS04245	16.587	93.9017	-2.5011	0.0014628	9.0318e-05	AVR78_RS04245	orotidine-5'-phosphate decarboxylase
AVR78_RS04255	27.645	1679.89	-5.9252	1.9281e-250	6.3508e-250	AVR78_RS04255	osmotically-inducible lipoprotein OsmB
AVR78_RS04290	66.3481	716.466	-3.4328	6.9221e-49	2.2467e-49	AVR78_RS04290	enoyl-ACP reductase FabI
AVR78_RS04330	22.116	122.445	-2.469	0.00041201	2.6048e-05	AVR78_RS04330	peptide ABC transporter ATP-binding protein SapD
AVR78_RS04350	82.9351	339.618	-2.0339	0.0007056	4.4107e-05	AVR78_RS04350	peptide ABC transporter substrate-binding protein SapA
AVR78_RS04360	27.645	136.509	-2.3039	0.0015812	9.7424e-05	AVR78_RS04360	XRE family transcriptional regulator
AVR78_RS04385	176.928	898.478	-2.3443	2.3823e-17	2.6091e-18	AVR78_RS04385	phage shock protein PspA
AVR78_RS04390	0	12.8236	-4.6807	0.0086658	0.00051094	AVR78_RS04390	envelope stress response membrane protein PspB
AVR78_RS04405	77.4061	321.417	-2.0539	0.00063523	3.9877e-05	AVR78_RS04405	hypothetical protein
AVR78_RS04425	38.7031	922.884	-4.5756	1.5974e-106	1.8941e-106	AVR78_RS04425	thiol peroxidase
AVR78_RS04445	154.812	365.679	-1.2401	0.0169	0.00097787	AVR78_RS04445	peptide ABC transporter substrate-binding protein
AVR78_RS04610	33.1741	239.925	-2.8545	6.3721e-11	5.3987e-12	AVR78_RS04610	hypothetical protein
AVR78_RS04660	66.3481	273.432	-2.0431	0.001998	0.00012237	AVR78_RS04660	hypothetical protein
AVR78_RS04690	44.2321	223.379	-2.3363	2.8089e-05	1.891e-06	AVR78_RS04690	tRNA 2-thiocytidine(32) synthetase TtcA
AVR78_RS04715	33.1741	1635.21	-5.6233	7.3812e-235	2.2378e-234	AVR78_RS04715	universal stress protein UspF
AVR78_RS04750	88.4641	311.903	-1.8179	0.056085	0.0031482	AVR78_RS04750	2-hydroxyacid dehydrogenase
AVR78_RS04885	0	9.92793	-4.3115	0.029763	0.0016953	AVR78_RS04885	phenylacetate-CoA oxygenase subunit PaaI
AVR78_RS04900	0	9.10061	-4.186	0.042325	0.0023912	AVR78_RS04900	2%2C3-dehydroadipyl-CoA hydratase
AVR78_RS04930	33.1741	151.401	-2.1902	0.0038327	0.00023161	AVR78_RS04930	phenylacetic acid degradation operon negative regulatory protein PaaX
AVR78_RS04950	392.56	1454.03	-1.8891	3.3734e-07	2.4821e-08	AVR78_RS04950	ATP-dependent RNA helicase HrpA
AVR78_RS05005	66.3481	134.441	-1.0188	0.0084764	0.00049999	AVR78_RS05005	FAD-binding monooxygenase
AVR78_RS05025	143.754	2535.35	-4.1405	3.246e-247	1.007e-246	AVR78_RS05025	Glu/Leu/Phe/Val dehydrogenase
AVR78_RS05045	55.2901	246.544	-2.1568	0.00042879	2.7089e-05	AVR78_RS05045	succinylglutamate-semialdehyde dehydrogenase
AVR78_RS05050	27.645	220.897	-2.9983	1.1797e-11	1.0309e-12	AVR78_RS05050	N-succinylarginine dihydrolase
AVR78_RS05055	44.2321	92.6607	-1.0669	0.049319	0.0027766	AVR78_RS05055	succinylglutamate desuccinylase
AVR78_RS05090	44.2321	297.838	-2.7514	8.3227e-12	7.3283e-13	AVR78_RS05090	YqaE/Pmp3 family membrane protein
AVR78_RS05145	93.9932	361.956	-1.9452	0.0035052	0.0002123	AVR78_RS05145	DUF945 domain-containing protein
AVR78_RS05155	60.8191	356.165	-2.5499	1.0753e-10	8.9986e-12	AVR78_RS05155	fumarate hydratase
AVR78_RS05160	154.812	315.626	-1.0277	7.5395e-05	4.9581e-06	AVR78_RS05160	class II fumarate hydratase
AVR78_RS05165	55.2901	442.62	-3.001	6.9298e-22	8.9924e-23	AVR78_RS05165	DNA replication terminus site-binding protein
AVR78_RS05180	55.2901	121.204	-1.1323	0.055842	0.0031352	AVR78_RS05180	two-component system response regulator RstA
AVR78_RS05205	33.1741	327.208	-3.3021	3.1339e-21	3.9758e-22	AVR78_RS05205	DUF1471 domain-containing protein
AVR78_RS05225	77.4061	397.945	-2.362	9.2207e-09	7.1847e-10	AVR78_RS05225	NAD(P)(+) transhydrogenase (Re/Si-specific) subunit alpha
AVR78_RS05235	38.7031	270.95	-2.8075	1.4583e-11	1.2698e-12	AVR78_RS05235	hypothetical protein
AVR78_RS05240	121.638	1363.02	-3.4861	9.9565e-95	9.9117e-95	AVR78_RS05240	universal stress protein UspE
AVR78_RS05245	33.1741	2591.19	-6.2874	0	0	AVR78_RS05245	transcriptional regulator FNR
AVR78_RS05340	71.8771	287.496	-1.9999	0.0034815	0.00021091	AVR78_RS05340	anion permease
AVR78_RS05380	116.109	816.159	-2.8134	6.1391e-32	1.1142e-32	AVR78_RS05380	N-acetylmuramic acid 6-phosphate etherase
AVR78_RS05440	38.7031	191.94	-2.3101	0.00016153	1.0447e-05	AVR78_RS05440	hypothetical protein
AVR78_RS05445	11.058	254.817	-4.5263	3.001e-30	5.1991e-31	AVR78_RS05445	multidrug transporter subunit MdtJ
AVR78_RS05450	11.058	148.919	-3.7514	1.3251e-13	1.2479e-14	AVR78_RS05450	spermidine export protein MdtI
AVR78_RS05475	132.696	280.05	-1.0776	0.00085742	5.3448e-05	AVR78_RS05475	carboxypeptidase M32
AVR78_RS05485	49.7611	206.005	-2.0496	0.0066487	0.00039489	AVR78_RS05485	LysR family transcriptional regulator
AVR78_RS05490	49.7611	250.68	-2.3328	9.8692e-06	6.7723e-07	AVR78_RS05490	ROK family transcriptional regulator
AVR78_RS05495	105.051	409.114	-1.9614	0.0012919	7.9841e-05	AVR78_RS05495	ATP-dependent dethiobiotin synthetase BioD
AVR78_RS05525	11.058	364.852	-5.0441	1.0573e-48	3.4152e-49	AVR78_RS05525	DUF1161 domain-containing protein
AVR78_RS05530	82.9351	380.157	-2.1965	3.8143e-06	2.6598e-07	AVR78_RS05530	YnfC family lipoprotein
AVR78_RS05535	16.587	223.379	-3.7514	1.2161e-19	1.4523e-20	AVR78_RS05535	spermidine N1-acetyltransferase
AVR78_RS05540	33.1741	941.913	-4.8275	1.2456e-116	1.6784e-116	AVR78_RS05540	hypothetical protein
AVR78_RS05560	105.051	3841.7	-5.1926	0	0	AVR78_RS05560	UspA domain-containing protein
AVR78_RS05565	27.645	168.775	-2.61	3.1881e-06	2.2296e-07	AVR78_RS05565	GntR family transcriptional regulator
AVR78_RS05570	77.4061	286.255	-1.8868	0.024512	0.0014042	AVR78_RS05570	bifunctional NADP-dependent 3-hydroxy acid dehydrogenase/3-hydroxypropionate dehydrogenase YdfG
AVR78_RS05610	60.8191	883.173	-3.8601	6.3715e-77	4.4039e-77	AVR78_RS05610	heat-shock protein
AVR78_RS05715	33.1741	68.6682	-1.0496	0.078416	0.0043622	AVR78_RS05715	DUF4177 domain-containing protein
AVR78_RS05775	0	10.7553	-4.427	0.020923	0.001202	AVR78_RS05775	multiple antibiotic resistance protein MarB
AVR78_RS05780	0	10.7553	-4.427	0.020923	0.001202	AVR78_RS05780	MDR efflux pump AcrAB transcriptional activator MarA
AVR78_RS05840	82.9351	314.385	-1.9225	0.0098718	0.00057974	AVR78_RS05840	sensor domain-containing diguanylate cyclase
AVR78_RS05855	60.8191	278.809	-2.1967	7.5497e-05	4.9628e-06	AVR78_RS05855	N-acetyltransferase
AVR78_RS05985	0	23.9925	-5.5845	7.7457e-05	5.0812e-06	AVR78_RS05985	transcriptional regulator
AVR78_RS06155	138.225	1168.19	-3.0792	2.9087e-59	1.3042e-59	AVR78_RS06155	phosphoglycerate transporter PgtP
AVR78_RS06270	143.754	557.205	-1.9546	0.00021577	1.3858e-05	AVR78_RS06270	hypothetical protein
AVR78_RS06380	138.225	628.356	-2.1846	5.032e-09	3.9601e-10	AVR78_RS06380	LysR family transcriptional regulator
AVR78_RS06415	116.109	245.716	-1.0815	0.0019786	0.00012127	AVR78_RS06415	LysR family transcriptional regulator
AVR78_RS06450	77.4061	160.088	-1.0483	0.0070441	0.000418	AVR78_RS06450	AraC family transcriptional regulator
AVR78_RS06590	66.3481	1096.62	-4.0469	8.2732e-104	9.2741e-104	AVR78_RS06590	diaminobutyrate--2-oxoglutarate transaminase
AVR78_RS06595	99.5222	432.279	-2.1189	1.0431e-05	7.1378e-07	AVR78_RS06595	aspartate aminotransferase family protein
AVR78_RS06630	0	9.10061	-4.186	0.042325	0.0023912	AVR78_RS06630	pyrroloquinoline quinone precursor peptide PqqA
AVR78_RS06635	0	31.4385	-5.9745	3.5586e-06	2.4847e-07	AVR78_RS06635	pyrroloquinoline quinone biosynthesis protein PqqB
AVR78_RS06680	243.276	1039.95	-2.0958	4.2662e-11	3.6318e-12	AVR78_RS06680	catalase/peroxidase HPI
AVR78_RS06735	66.3481	253.162	-1.9319	0.017879	0.0010325	AVR78_RS06735	OsmC family peroxiredoxin
AVR78_RS06810	27.645	1413.08	-5.6757	1.041e-204	2.8055e-204	AVR78_RS06810	stationary-phase-induced ribosome-associated protein
AVR78_RS06855	110.58	1982.69	-4.1643	1.1279e-195	2.8388e-195	AVR78_RS06855	alcohol dehydrogenase AdhP
AVR78_RS06935	0	11.9963	-4.5845	0.012329	0.00072006	AVR78_RS06935	hypothetical protein
AVR78_RS06990	49.7611	473.232	-3.2495	8.2814e-29	1.3596e-29	AVR78_RS06990	TetR family transcriptional regulator
AVR78_RS07160	11.058	788.03	-6.1551	3.4018e-121	4.9059e-121	AVR78_RS07160	hypothetical protein
AVR78_RS07260	143.754	496.81	-1.7891	0.029559	0.0016847	AVR78_RS07260	PLP-dependent aminotransferase family protein
AVR78_RS07265	66.3481	4521.35	-6.0906	0	0	AVR78_RS07265	cytochrome ubiquinol oxidase subunit I
AVR78_RS07270	27.645	1669.96	-5.9166	9.6315e-249	3.0231e-248	AVR78_RS07270	cytochrome d ubiquinol oxidase subunit II
AVR78_RS07275	0	7.44595	-3.8965	0.085421	0.004738	AVR78_RS07275	DUF2474 domain-containing protein
AVR78_RS07280	16.587	674.686	-5.3461	6.6983e-94	6.5702e-94	AVR78_RS07280	hypothetical protein
AVR78_RS07290	82.9351	167.534	-1.0144	0.0030142	0.00018306	AVR78_RS07290	collagenase-like protease
AVR78_RS07405	27.645	55.8446	-1.0144	0.086801	0.0048116	AVR78_RS07405	transcriptional regulator
AVR78_RS07415	138.225	996.103	-2.8493	3.1681e-40	7.6079e-41	AVR78_RS07415	adenosine deaminase
AVR78_RS07425	0	9.51427	-4.2501	0.035495	0.0020123	AVR78_RS07425	division septum protein Blr
AVR78_RS07435	11.058	78.5961	-2.8294	0.00022879	1.4662e-05	AVR78_RS07435	transcription modulator YdgT
AVR78_RS07450	5.52901	64.9452	-3.5541	4.0476e-06	2.8196e-07	AVR78_RS07450	electron transport complex subunit RsxB
AVR78_RS07485	165.87	778.929	-2.2314	4.4307e-12	3.9351e-13	AVR78_RS07485	dipeptide/tripeptide permease DtpA
AVR78_RS07490	49.7611	295.356	-2.5694	2.3525e-09	1.8718e-10	AVR78_RS07490	glutathione transferase GstA
AVR78_RS07500	110.58	629.597	-2.5093	1.0529e-16	1.1174e-17	AVR78_RS07500	tyrosine--tRNA ligase
AVR78_RS07505	93.9932	219.242	-1.2219	0.048886	0.0027533	AVR78_RS07505	pyridoxamine 5'-phosphate oxidase
AVR78_RS07510	11.058	103.002	-3.2195	2.8769e-07	2.1261e-08	AVR78_RS07510	lysozyme inhibitor
AVR78_RS07520	55.2901	1258.78	-4.5089	1.3941e-141	2.4631e-141	AVR78_RS07520	outer membrane lipoprotein SlyB
AVR78_RS07530	110.58	1060.22	-3.2612	5.5204e-63	2.7224e-63	AVR78_RS07530	transcriptional regulator SlyA
AVR78_RS07535	11.058	71.1502	-2.6858	0.0013959	8.6226e-05	AVR78_RS07535	DUF1656 domain-containing protein
AVR78_RS07550	38.7031	385.948	-3.3179	4.8558e-25	7.0293e-26	AVR78_RS07550	superoxide dismutase [Cu-Zn] SodC2
AVR78_RS07555	38.7031	155.951	-2.0106	0.028022	0.0015992	AVR78_RS07555	aldo/keto reductase
AVR78_RS07575	38.7031	426.074	-3.4606	2.5595e-30	4.4429e-31	AVR78_RS07575	lactoylglutathione lyase
AVR78_RS07580	44.2321	179.116	-2.0177	0.016986	0.00098259	AVR78_RS07580	ribonuclease T
AVR78_RS07585	127.167	1850.32	-3.863	2.6914e-159	5.4814e-159	AVR78_RS07585	glutaredoxin
AVR78_RS07600	27.645	2750.45	-6.6365	0	0	AVR78_RS07600	superoxide dismutase [Fe]
AVR78_RS07610	121.638	291.219	-1.2595	0.047186	0.0026604	AVR78_RS07610	PurR family transcriptional regulator
AVR78_RS07625	88.4641	548.105	-2.6313	1.4624e-17	1.6143e-18	AVR78_RS07625	cyclopropane-fatty-acyl-phospholipid synthase
AVR78_RS07630	77.4061	338.377	-2.1281	7.6434e-05	5.0166e-06	AVR78_RS07630	riboflavin synthase
AVR78_RS07635	127.167	261.849	-1.042	0.00047373	2.9872e-05	AVR78_RS07635	multidrug transporter MdtK
AVR78_RS07695	77.4061	359.474	-2.2154	4.092e-06	2.849e-07	AVR78_RS07695	winged helix family transcriptional regulator
AVR78_RS07700	27.645	124.513	-2.1712	0.010636	0.00062351	AVR78_RS07700	hypothetical protein
AVR78_RS07715	127.167	444.275	-1.8047	0.029367	0.0016748	AVR78_RS07715	carbonic anhydrase
AVR78_RS07785	55.2901	254.403	-2.202	0.00014007	9.0949e-06	AVR78_RS07785	hypothetical protein
AVR78_RS07790	38.7031	146.437	-1.9198	0.080219	0.0044579	AVR78_RS07790	hypothetical protein
AVR78_RS07855	0	16.5466	-5.0485	0.0017795	0.00010917	AVR78_RS07855	hypothetical protein
AVR78_RS07930	0	21.5105	-5.427	0.00021896	1.4056e-05	AVR78_RS07930	transcriptional regulator
AVR78_RS07940	171.399	878.209	-2.3572	2.0361e-17	2.2336e-18	AVR78_RS07940	DUF535 domain-containing protein
AVR78_RS08005	66.3481	337.136	-2.3452	2.0501e-07	1.5214e-08	AVR78_RS08005	energy transducer protein TonB
AVR78_RS08090	49.7611	344.582	-2.7918	4.6722e-14	4.4855e-15	AVR78_RS08090	gluconate 2-dehydrogenase
AVR78_RS08145	99.5222	410.768	-2.0452	0.00014299	9.2796e-06	AVR78_RS08145	MFS transporter
AVR78_RS08150	16.587	91.4197	-2.4625	0.0024113	0.00014722	AVR78_RS08150	VOC family protein
AVR78_RS08200	44.2321	167.948	-1.9248	0.057878	0.0032454	AVR78_RS08200	ABC transporter ATP-binding protein
AVR78_RS08340	88.4641	402.909	-2.1873	2.6206e-06	1.839e-07	AVR78_RS08340	fumarate hydratase FumD
AVR78_RS08355	105.051	916.266	-3.1247	8.1639e-49	2.6433e-49	AVR78_RS08355	pyruvate kinase PykF
AVR78_RS08360	33.1741	4762.93	-7.1656	0	0	AVR78_RS08360	murein lipoprotein
AVR78_RS08365	99.5222	429.797	-2.1106	1.4311e-05	9.7527e-07	AVR78_RS08365	murein transpeptidase
AVR78_RS08380	16.587	83.5601	-2.3328	0.010717	0.00062797	AVR78_RS08380	signal peptide peptidase SppA
AVR78_RS08425	16.587	112.103	-2.7567	2.5952e-05	1.7489e-06	AVR78_RS08425	TetR/AcrR family transcriptional regulator
AVR78_RS08480	88.4641	607.672	-2.7801	2.7398e-23	3.739e-24	AVR78_RS08480	GlsB/YeaQ/YmgE family stress response membrane protein
AVR78_RS08510	304.096	2156.02	-2.8258	1.0435e-82	8.3102e-83	AVR78_RS08510	phosphoenolpyruvate synthase
AVR78_RS08525	33.1741	139.405	-2.0712	0.020479	0.0011783	AVR78_RS08525	3-deoxy-7-phosphoheptulonate synthase
AVR78_RS08540	16.587	200.627	-3.5964	2.2111e-16	2.3116e-17	AVR78_RS08540	lipoprotein
AVR78_RS08550	60.8191	233.306	-1.9396	0.020648	0.001187	AVR78_RS08550	glutathione peroxidase
AVR78_RS08570	77.4061	453.376	-2.5502	3.2051e-13	2.9795e-14	AVR78_RS08570	LysR family transcriptional regulator
AVR78_RS08580	44.2321	90.1787	-1.0277	0.034363	0.0019494	AVR78_RS08580	RidA family protein
AVR78_RS08585	82.9351	311.075	-1.9072	0.013436	0.00078287	AVR78_RS08585	integration host factor subunit alpha
AVR78_RS08590	204.573	445.516	-1.1229	0.00017054	1.102e-05	AVR78_RS08590	phenylalanine--tRNA ligase subunit beta
AVR78_RS08605	16.587	1269.53	-6.2581	1.2206e-195	3.0436e-195	AVR78_RS08605	50S ribosomal protein L20
AVR78_RS08610	11.058	219.656	-4.3121	1.5543e-24	2.2081e-25	AVR78_RS08610	50S ribosomal protein L35
AVR78_RS08615	66.3481	2895.23	-5.4475	0	0	AVR78_RS08615	translation initiation factor IF-3
AVR78_RS08620	132.696	1628.18	-3.6171	1.467e-122	2.1624e-122	AVR78_RS08620	threonine--tRNA ligase
AVR78_RS08625	33.1741	427.315	-3.6872	7.5443e-35	1.5145e-35	AVR78_RS08625	hypothetical protein
AVR78_RS08635	71.8771	521.63	-2.8594	4.2918e-22	5.6047e-23	AVR78_RS08635	6-phosphofructokinase II
AVR78_RS08645	99.5222	1742.35	-4.1299	9.2685e-170	2.0436e-169	AVR78_RS08645	fructosamine kinase family protein
AVR78_RS08680	33.1741	135.682	-2.0321	0.032838	0.0018668	AVR78_RS08680	dsDNA-mimic protein
AVR78_RS08700	71.8771	156.779	-1.1251	0.02665	0.0015235	AVR78_RS08700	oligopeptide ABC transporter permease OppC
AVR78_RS08710	210.102	1715.46	-3.0294	3.3502e-82	2.5983e-82	AVR78_RS08710	oligopeptide ABC transporter substrate-binding protein OppA
AVR78_RS08730	287.508	3555.44	-3.6284	3.6113e-267	1.2513e-266	AVR78_RS08730	bifunctional acetaldehyde-CoA/alcohol dehydrogenase
AVR78_RS08735	55.2901	323.485	-2.5486	7.95e-10	6.4547e-11	AVR78_RS08735	thymidine kinase
AVR78_RS08745	93.9932	3746.14	-5.3167	0	0	AVR78_RS08745	DNA-binding transcriptional regulator H-NS
AVR78_RS08750	132.696	453.789	-1.7739	0.049971	0.0028127	AVR78_RS08750	UTP--glucose-1-phosphate uridylyltransferase
AVR78_RS08755	132.696	271.777	-1.0343	0.00029307	1.8692e-05	AVR78_RS08755	two-component system response regulator RssB
AVR78_RS08770	49.7611	239.511	-2.267	6.0821e-05	4.0185e-06	AVR78_RS08770	formyltetrahydrofolate deformylase
AVR78_RS08890	165.87	1374.61	-3.0509	1.3285e-67	7.5095e-68	AVR78_RS08890	transporter
AVR78_RS08895	38.7031	494.328	-3.675	9.0033e-40	2.1238e-40	chaB	cation transport regulator
AVR78_RS08900	60.8191	293.288	-2.2697	8.5319e-06	5.8682e-07	AVR78_RS08900	sodium-potassium/proton antiporter ChaA
AVR78_RS08905	66.3481	466.613	-2.8141	5.7515e-19	6.7125e-20	AVR78_RS08905	2-dehydro-3-deoxyphosphooctonate aldolase
AVR78_RS08930	105.051	864.971	-3.0416	8.0259e-43	2.1159e-43	AVR78_RS08930	glutamyl-tRNA reductase
AVR78_RS08935	60.8191	134.854	-1.1488	0.053713	0.0030163	lolB	outer membrane lipoprotein LolB
AVR78_RS08940	60.8191	499.292	-3.0373	2.5014e-25	3.679e-26	AVR78_RS08940	4-(cytidine 5'-diphospho)-2-C-methyl-D-erythritol kinase
AVR78_RS08950	44.2321	1347.72	-4.9293	2.7767e-170	6.1734e-170	AVR78_RS08950	ribose-phosphate pyrophosphokinase
AVR78_RS08965	77.4061	2853.04	-5.2039	0	0	AVR78_RS08965	membrane protein
AVR78_RS08970	38.7031	192.767	-2.3163	0.0001407	9.1331e-06	AVR78_RS08970	aminoacyl-tRNA hydrolase
AVR78_RS08975	82.9351	1749.38	-4.3987	6.9221e-189	1.6789e-188	AVR78_RS08975	redox-regulated ATPase YchF
AVR78_RS09000	149.283	345.409	-1.2103	0.010191	0.00059822	AVR78_RS09000	DUF2058 domain-containing protein
AVR78_RS09010	82.9351	182.426	-1.1373	0.020586	0.0011842	AVR78_RS09010	cold shock domain-containing protein
AVR78_RS09035	66.3481	136.509	-1.0409	0.011411	0.00066749	AVR78_RS09035	N-acetyltransferase
AVR78_RS09040	127.167	2286.32	-4.1682	1.0683e-225	3.098e-225	AVR78_RS09040	phosphoenolpyruvate carboxykinase (ATP)
AVR78_RS09045	55.2901	215.519	-1.9627	0.019179	0.0011049	AVR78_RS09045	LysR family transcriptional regulator
AVR78_RS09235	132.696	450.48	-1.7633	0.06148	0.0034373	AVR78_RS09235	alanine racemase
AVR78_RS09240	165.87	873.658	-2.397	1.1562e-18	1.3371e-19	AVR78_RS09240	D-amino acid dehydrogenase small subunit
AVR78_RS09250	110.58	568.788	-2.3628	6.2717e-12	5.5387e-13	AVR78_RS09250	SpoVR family protein
AVR78_RS09255	121.638	617.6	-2.3441	2.1718e-12	1.9516e-13	AVR78_RS09255	fatty acid metabolism transcriptional regulator FadR
AVR78_RS09260	93.9932	217.587	-1.211	0.04191	0.00237	AVR78_RS09260	sodium/proton antiporter NhaB
AVR78_RS09265	55.2901	121.617	-1.1373	0.058685	0.0032865	AVR78_RS09265	disulfide bond formation protein DsbB
AVR78_RS09280	33.1741	276.328	-3.0583	5.4739e-15	5.4371e-16	AVR78_RS09280	isomerase/hydrolase
AVR78_RS09285	5.52901	124.099	-4.4883	2.256e-15	2.273e-16	AVR78_RS09285	hypothetical protein
AVR78_RS09295	55.2901	396.29	-2.8415	7.771e-17	8.323e-18	AVR78_RS09295	septum site-determining protein MinC
AVR78_RS09300	33.1741	601.467	-4.1804	4.4795e-61	2.0894e-61	AVR78_RS09300	septum site-determining protein MinD
AVR78_RS09305	22.116	150.574	-2.7673	9.1862e-07	6.5918e-08	AVR78_RS09305	cell division topological specificity factor
AVR78_RS09315	182.457	371.884	-1.0273	1.7026e-05	1.1576e-06	AVR78_RS09315	long-chain-fatty-acid--CoA ligase FadD
AVR78_RS09355	77.4061	1519.8	-4.2953	2.3751e-158	4.7643e-158	AVR78_RS09355	L-serine ammonia-lyase
AVR78_RS09365	210.102	895.169	-2.0911	1.2718e-09	1.0223e-10	AVR78_RS09365	TerC family protein
AVR78_RS09370	49.7611	373.952	-2.9098	3.7826e-17	4.1073e-18	AVR78_RS09370	PTS mannose transporter subunit IIAB
AVR78_RS09375	55.2901	225.861	-2.0303	0.0060599	0.0003612	AVR78_RS09375	PTS mannose/fructose/sorbose transporter subunit IIC
AVR78_RS09395	71.8771	152.642	-1.0865	0.016	0.0009272	AVR78_RS09395	hypothetical protein
AVR78_RS09410	16.587	1035.4	-5.964	8.8027e-156	1.7526e-155	AVR78_RS09410	cold-shock protein CspC
AVR78_RS09415	27.645	326.795	-3.5633	3.4144e-25	4.9833e-26	AVR78_RS09415	DUF2627 domain-containing protein
AVR78_RS09440	110.58	706.124	-2.6748	1.6652e-23	2.2888e-24	AVR78_RS09440	DNA-binding transcriptional regulator KdgR
AVR78_RS09450	232.218	1801.09	-2.9553	4.8863e-80	3.6213e-80	AVR78_RS09450	protease HtpX
AVR78_RS09455	154.812	1305.11	-3.0756	8.8782e-66	4.8241e-66	AVR78_RS09455	carboxy terminal-processing peptidase
AVR78_RS09460	60.8191	814.504	-3.7433	6.9404e-67	3.8236e-67	AVR78_RS09460	RNA chaperone ProQ
AVR78_RS09485	0	385.121	-9.5892	8.7913e-56	3.543e-56	AVR78_RS09485	DUF1480 domain-containing protein
AVR78_RS09495	66.3481	141.473	-1.0924	0.022223	0.0012756	AVR78_RS09495	protein-serine/threonine phosphatase
AVR78_RS09500	55.2901	623.805	-3.496	1.2738e-44	3.5698e-45	AVR78_RS09500	DUF535 domain-containing protein
AVR78_RS09530	22.116	158.847	-2.8445	1.2504e-07	9.36e-09	AVR78_RS09530	DNA polymerase III subunit theta
AVR78_RS09535	110.58	246.957	-1.1592	0.011207	0.00065586	AVR78_RS09535	exodeoxyribonuclease X
AVR78_RS09550	82.9351	869.108	-3.3895	3.6065e-57	1.5105e-57	AVR78_RS09550	DUF533 domain-containing protein
AVR78_RS09555	93.9932	785.961	-3.0638	6.9445e-40	1.6411e-40	AVR78_RS09555	YebG family protein
AVR78_RS09575	93.9932	550.587	-2.5503	9.7619e-16	9.9558e-17	AVR78_RS09575	glucose-6-phosphate dehydrogenase
AVR78_RS09590	38.7031	160.915	-2.0558	0.015313	0.00088836	AVR78_RS09590	transcriptional regulator HexR
AVR78_RS09595	132.696	526.181	-1.9874	0.00011584	7.5414e-06	AVR78_RS09595	pyruvate kinase
AVR78_RS09620	165.87	333.413	-1.0073	2.162e-05	1.4629e-06	AVR78_RS09620	lauroyl-Kdo(2)-lipid IV(A) myristoyltransferase
AVR78_RS09625	88.4641	733.426	-3.0515	6.5398e-37	1.3981e-37	AVR78_RS09625	murein DD-endopeptidase MepM
AVR78_RS09630	88.4641	450.894	-2.3496	1.5812e-09	1.2653e-10	AVR78_RS09630	zinc ABC transporter substrate-binding protein
AVR78_RS09635	88.4641	374.366	-2.0813	0.00011203	7.2952e-06	AVR78_RS09635	zinc ABC transporter ATP-binding protein ZnuC
AVR78_RS09645	116.109	234.134	-1.0119	0.00042278	2.6716e-05	AVR78_RS09645	Holliday junction branch migration DNA helicase RuvB
AVR78_RS09650	11.058	176.635	-3.9976	9.0894e-18	1.0134e-18	AVR78_RS09650	Holliday junction branch migration protein RuvA
AVR78_RS09660	27.645	309.834	-3.4864	7.2563e-23	9.7627e-24	AVR78_RS09660	YebC/PmpR family DNA-binding transcriptional regulator
AVR78_RS09665	22.116	112.93	-2.3523	0.0024545	0.00014978	AVR78_RS09665	dihydroneopterin triphosphate diphosphatase
AVR78_RS09670	154.812	685.441	-2.1465	7.2003e-09	5.64e-10	AVR78_RS09670	aspartate--tRNA ligase
AVR78_RS09675	77.4061	167.12	-1.1104	0.017456	0.0010087	AVR78_RS09675	hydrolase
AVR78_RS09690	11.058	105.898	-3.2595	1.2249e-07	9.1744e-09	AVR78_RS09690	carboxy-S-adenosyl-L-methionine synthase CmoA
AVR78_RS09700	165.87	771.07	-2.2168	1.3795e-11	1.2039e-12	AVR78_RS09700	copper homeostasis protein CutC
AVR78_RS09760	49.7611	325.14	-2.708	4.021e-12	3.5784e-13	AVR78_RS09760	ferritin
AVR78_RS09775	44.2321	92.6607	-1.0669	0.049319	0.0027766	AVR78_RS09775	DUF2766 domain-containing protein
AVR78_RS09795	71.8771	306.939	-2.0943	0.00035246	2.2352e-05	AVR78_RS09795	H-type ferritin
AVR78_RS09810	71.8771	323.485	-2.1701	3.9369e-05	2.6304e-06	AVR78_RS09810	YecA family protein
AVR78_RS09850	132.696	769.829	-2.5364	6.1367e-21	7.6866e-22	AVR78_RS09850	two-component system response regulator UvrY
AVR78_RS09860	116.109	905.51	-2.9632	1.8636e-41	4.673e-42	AVR78_RS09860	transcriptional regulator SdiA
AVR78_RS09880	149.283	1258.78	-3.0759	1.5855e-63	7.9813e-64	AVR78_RS09880	cystine ABC transporter substrate-binding protein
AVR78_RS09890	93.9932	428.142	-2.1875	1.2688e-06	9.0485e-08	AVR78_RS09890	lipoprotein
AVR78_RS09925	0	35.1614	-6.1359	7.79e-07	5.6186e-08	AVR78_RS09925	very short patch repair endonuclease
AVR78_RS09935	11.058	124.927	-3.4979	3.4935e-10	2.8723e-11	AVR78_RS09935	phosphohydrolase
AVR78_RS09980	0	10.3416	-4.3704	0.024955	0.001429	AVR78_RS09980	tRNA-Asn
AVR78_RS10090	11.058	73.6322	-2.7352	0.00077491	4.8395e-05	AVR78_RS10090	oxidoreductase
AVR78_RS10135	27.645	126.168	-2.1902	0.0082991	0.00048975	AVR78_RS10135	adenosylcobinamide-GDP ribazoletransferase
AVR78_RS10140	77.4061	851.734	-3.4599	7.5045e-59	3.3203e-59	AVR78_RS10140	hypothetical protein
AVR78_RS10145	33.1741	165.879	-2.322	0.00038004	2.4055e-05	AVR78_RS10145	FUSC family protein
AVR78_RS10275	138.225	998.171	-2.8523	1.9282e-40	4.6681e-41	AVR78_RS10275	APC family permease
AVR78_RS10360	11.058	73.2185	-2.7271	0.00085566	5.3363e-05	AVR78_RS10360	O9 family O-antigen ABC transporter permease subunit Wzm
AVR78_RS10425	116.109	2242.47	-4.2715	1.2782e-230	3.789e-230	AVR78_RS10425	phosphogluconate dehydrogenase (NADP(+)-dependent%2C decarboxylating)
AVR78_RS10470	210.102	447.584	-1.0911	4.4913e-05	2.9897e-06	AVR78_RS10470	protein Wzc
AVR78_RS10495	82.9351	409.527	-2.3039	4.437e-08	3.3813e-09	AVR78_RS10495	UTP--glucose-1-phosphate uridylyltransferase
AVR78_RS10515	33.1741	160.502	-2.2745	0.0009283	5.7757e-05	AVR78_RS10515	uridine kinase
AVR78_RS10585	132.696	282.532	-1.0903	0.0011621	7.1954e-05	AVR78_RS10585	U32 family peptidase
AVR78_RS10590	33.1741	194.836	-2.5541	1.6594e-06	1.1749e-07	AVR78_RS10590	lipid kinase YegS
AVR78_RS10670	149.283	617.187	-2.0477	2.8418e-06	1.9905e-07	AVR78_RS10670	fructose-bisphosphate aldolase
AVR78_RS10735	165.87	567.547	-1.7747	0.027864	0.0015908	AVR78_RS10735	iron-sulfur cluster carrier protein ApbC
AVR78_RS10745	38.7031	229.17	-2.5659	1.5596e-07	1.1626e-08	AVR78_RS10745	DUF1456 domain-containing protein
AVR78_RS10760	22.116	111.276	-2.331	0.0032919	0.00019961	AVR78_RS10760	membrane protein
AVR78_RS10805	77.4061	275.914	-1.8337	0.058513	0.0032783	AVR78_RS10805	YIP1 family protein
AVR78_RS10860	22.116	109.621	-2.3094	0.0043919	0.00026391	AVR78_RS10860	cytidine deaminase
AVR78_RS10895	88.4641	516.666	-2.5461	9.0838e-15	8.9528e-16	AVR78_RS10895	GTP cyclohydrolase I FolE
AVR78_RS10900	44.2321	177.462	-2.0043	0.020592	0.0011843	AVR78_RS10900	S-formylglutathione hydrolase
AVR78_RS10920	204.573	477.782	-1.2237	0.0038546	0.00023288	AVR78_RS10920	LysR family transcriptional regulator
AVR78_RS11010	38.7031	532.385	-3.782	2.9645e-45	8.4771e-46	AVR78_RS11010	bifunctional murein DD-endopeptidase/murein LD-carboxypeptidase
AVR78_RS11040	16.587	771.07	-5.5387	1.9265e-110	2.4476e-110	AVR78_RS11040	hypothetical protein
AVR78_RS11065	93.9932	374.366	-1.9938	0.00098894	6.1488e-05	AVR78_RS11065	50S ribosomal protein L25
AVR78_RS11095	11.058	58.3266	-2.3991	0.02244	0.0012873	AVR78_RS11095	hypothetical protein
AVR78_RS11100	38.7031	266.4	-2.7831	4.2719e-11	3.6355e-12	AVR78_RS11100	DUF3413 domain-containing protein
AVR78_RS11110	99.5222	225.447	-1.1797	0.022442	0.0012873	AVR78_RS11110	AI-2E family transporter
AVR78_RS11115	154.812	4079.97	-4.72	0	0	AVR78_RS11115	ecotin
AVR78_RS11155	254.334	18584.3	-6.1912	0	0	AVR78_RS11155	phosphoporin PhoE
AVR78_RS11165	293.037	721.016	-1.2989	0.0078509	0.00046392	AVR78_RS11165	phosphotransferase RcsD
AVR78_RS11170	82.9351	649.452	-2.9692	2.1658e-30	3.7767e-31	AVR78_RS11170	transcriptional regulator RcsB
AVR78_RS11180	215.631	1866.87	-3.114	1.2137e-96	1.2502e-96	AVR78_RS11180	DNA topoisomerase (ATP-hydrolyzing) subunit A
AVR78_RS11190	127.167	505.911	-1.9922	0.00013554	8.8071e-06	AVR78_RS11190	ribonucleoside-diphosphate reductase subunit alpha
AVR78_RS11265	77.4061	155.951	-1.0106	0.0039166	0.00023651	AVR78_RS11265	membrane protein
AVR78_RS11350	110.58	269.709	-1.2863	0.086099	0.0047747	AVR78_RS11350	NADH-quinone oxidoreductase subunit N
AVR78_RS11385	154.812	840.151	-2.4401	2.0023e-19	2.3732e-20	AVR78_RS11385	NADH-quinone oxidoreductase subunit NuoG
AVR78_RS11390	71.8771	500.533	-2.7999	6.5761e-20	7.9713e-21	AVR78_RS11390	NADH-quinone oxidoreductase subunit NuoF
AVR78_RS11395	22.116	152.642	-2.787	5.622e-07	4.0903e-08	AVR78_RS11395	NADH-quinone oxidoreductase subunit NuoE
AVR78_RS11400	82.9351	764.037	-3.2036	8.0273e-44	2.1965e-44	AVR78_RS11400	NADH-quinone oxidoreductase subunit NuoC/D
AVR78_RS11405	66.3481	352.028	-2.4076	1.5538e-08	1.2023e-09	AVR78_RS11405	NADH-quinone oxidoreductase subunit B
AVR78_RS11410	11.058	158.433	-3.8407	5.1859e-15	5.1549e-16	AVR78_RS11410	NADH-quinone oxidoreductase subunit A
AVR78_RS11415	22.116	155.124	-2.8103	3.0979e-07	2.2845e-08	AVR78_RS11415	hypothetical protein
AVR78_RS11425	66.3481	367.747	-2.4706	8.7461e-10	7.0774e-11	AVR78_RS11425	transcriptional regulator LrhA
AVR78_RS11450	5.52901	148.505	-4.7474	1.925e-19	2.2826e-20	AVR78_RS11450	YfbU family protein
AVR78_RS11455	55.2901	356.578	-2.6891	7.4591e-13	6.8129e-14	AVR78_RS11455	DUF412 domain-containing protein
AVR78_RS11460	71.8771	1287.74	-4.1632	1.0124e-127	1.5347e-127	AVR78_RS11460	acetate kinase
AVR78_RS11465	138.225	735.494	-2.4117	2.2445e-16	2.3437e-17	AVR78_RS11465	phosphate acetyltransferase
AVR78_RS11470	127.167	279.637	-1.1368	0.0041025	0.00024752	AVR78_RS11470	NUDIX hydrolase
AVR78_RS11475	5.52901	217.587	-5.2984	3.1415e-31	5.5913e-32	AVR78_RS11475	phosphodiesterase
AVR78_RS11490	5.52901	101.348	-4.1961	1.1252e-11	9.8391e-13	AVR78_RS11490	dihydroneopterin triphosphate 2'-epimerase
AVR78_RS11545	154.812	550.173	-1.8294	0.0084181	0.00049666	AVR78_RS11545	amidophosphoribosyltransferase
AVR78_RS11550	55.2901	301.561	-2.4474	5.4617e-08	4.1503e-09	AVR78_RS11550	colicin V production protein
AVR78_RS11565	149.283	757.419	-2.343	7.9056e-15	7.8031e-16	AVR78_RS11565	acetyl-CoA carboxylase carboxyltransferase subunit beta
AVR78_RS11570	5.52901	77.7688	-3.8141	5.264e-08	4.0023e-09	AVR78_RS11570	membrane protein
AVR78_RS11600	165.87	1254.64	-2.9191	3.2405e-54	1.2475e-54	AVR78_RS11600	beta-ketoacyl-[acyl-carrier-protein] synthase I
AVR78_RS11615	5.52901	40.1254	-2.8594	0.0073612	0.00043604	AVR78_RS11615	elongation factor P hydroxylase
AVR78_RS11625	5.52901	90.1787	-4.0277	6.5452e-10	5.3239e-11	AVR78_RS11625	penicillin-insensitive murein endopeptidase
AVR78_RS11630	71.8771	315.212	-2.1327	0.000121	7.8756e-06	AVR78_RS11630	chorismate synthase
AVR78_RS11635	66.3481	302.802	-2.1902	4.323e-05	2.8805e-06	AVR78_RS11635	50S ribosomal protein L3 N(5)-glutamine methyltransferase
AVR78_RS11645	60.8191	629.597	-3.3718	2.21e-41	5.5259e-42	AVR78_RS11645	phosphohistidine phosphatase
AVR78_RS11675	55.2901	323.899	-2.5505	7.3172e-10	5.9446e-11	AVR78_RS11675	phospholipid-binding lipoprotein MlaA
AVR78_RS11725	5.52901	36.8161	-2.7352	0.017454	0.0010087	AVR78_RS11725	DUF1883 domain-containing protein
AVR78_RS11730	16.587	109.207	-2.7189	5.1274e-05	3.3995e-06	AVR78_RS11730	hypothetical protein
AVR78_RS11875	16.587	1761.38	-6.7305	5.9138e-278	2.1613e-277	AVR78_RS11875	hypothetical protein
AVR78_RS11920	60.8191	280.878	-2.2073	5.589e-05	3.701e-06	AVR78_RS11920	hypothetical protein
AVR78_RS11925	171.399	405.391	-1.242	0.012479	0.00072817	AVR78_RS11925	hypothetical protein
AVR78_RS12055	22.116	313.971	-3.8275	5.103e-28	8.1818e-29	AVR78_RS12055	DUF2502 domain-containing protein
AVR78_RS12065	154.812	374.78	-1.2755	0.034439	0.0019528	AVR78_RS12065	NupC/NupG family nucleoside CNT transporter
AVR78_RS12085	44.2321	89.7651	-1.0211	0.032276	0.0018365	AVR78_RS12085	negative regulator
AVR78_RS12095	226.689	869.108	-1.9388	8.2243e-06	5.6596e-07	AVR78_RS12095	glutamate--tRNA ligase
AVR78_RS12145	71.8771	765.692	-3.4132	2.005e-51	7.02e-52	AVR78_RS12145	cell division protein ZipA
AVR78_RS12155	44.2321	172.498	-1.9634	0.035871	0.0020332	AVR78_RS12155	sulfate transporter CysZ
AVR78_RS12160	127.167	311.903	-1.2944	0.074502	0.0041479	AVR78_RS12160	cysteine synthase A
AVR78_RS12170	5.52901	592.78	-6.7443	6.3635e-95	6.3825e-95	AVR78_RS12170	phosphocarrier protein HPr
AVR78_RS12175	77.4061	2281.77	-4.8816	1.4792e-283	5.6379e-283	AVR78_RS12175	phosphoenolpyruvate-protein phosphotransferase PtsI
AVR78_RS12180	127.167	1374.61	-3.4342	3.2672e-92	3.1006e-92	AVR78_RS12180	glucose-specific phosphotransferase enzyme IIA component
AVR78_RS12190	138.225	538.177	-1.9611	0.00022611	1.4501e-05	pdxK	pyridoxine/pyridoxal/pyridoxamine kinase
AVR78_RS12260	77.4061	696.196	-3.169	5.9246e-39	1.3568e-39	AVR78_RS12260	N-acetylmuramoyl-L-alanine amidase AmiA
AVR78_RS12355	276.45	954.736	-1.7881	0.0026528	0.00016163	AVR78_RS12355	NADP-dependent oxaloacetate-decarboxylating malate dehydrogenase
AVR78_RS12395	33.1741	267.227	-3.0099	6.1676e-14	5.8893e-15	AVR78_RS12395	succinyl-diaminopimelate desuccinylase
AVR78_RS12415	88.4641	317.28	-1.8426	0.03698	0.0020947	AVR78_RS12415	neutral zinc metallopeptidase
AVR78_RS12430	149.283	774.793	-2.3758	4.3009e-16	4.4493e-17	AVR78_RS12430	outer membrane protein assembly factor BamC
AVR78_RS12435	171.399	1168.6	-2.7693	1.0972e-42	2.8784e-43	AVR78_RS12435	4-hydroxy-tetrahydrodipicolinate synthase
AVR78_RS12440	66.3481	303.216	-2.1922	4.0748e-05	2.7212e-06	AVR78_RS12440	glycine cleavage system transcriptional repressor
AVR78_RS12445	38.7031	311.075	-3.0067	6.2785e-16	6.4575e-17	AVR78_RS12445	thioredoxin-dependent thiol peroxidase
AVR78_RS12465	0	54.6036	-6.7709	3.4629e-10	2.848e-11	AVR78_RS12465	arsenate reductase (glutaredoxin)
AVR78_RS12470	49.7611	109.207	-1.134	0.070722	0.0039457	AVR78_RS12470	ISNCY family transposase
AVR78_RS12530	204.573	781.411	-1.9335	2.9672e-05	1.9941e-06	AVR78_RS12530	polyphosphate kinase 1
AVR78_RS12535	171.399	383.466	-1.1617	0.0017041	0.00010486	AVR78_RS12535	exopolyphosphatase
AVR78_RS12545	49.7611	102.589	-1.0438	0.029325	0.0016728	AVR78_RS12545	DUF2633 domain-containing protein
AVR78_RS12560	82.9351	2389.74	-4.8487	1.9805e-294	8.0058e-294	AVR78_RS12560	GMP synthase (glutamine-hydrolyzing)
AVR78_RS12565	199.044	2910.13	-3.8699	2.7232e-250	8.8603e-250	AVR78_RS12565	IMP dehydrogenase
AVR78_RS12575	49.7611	719.775	-3.8545	7.4557e-63	3.6633e-63	AVR78_RS12575	hypothetical protein
AVR78_RS12595	44.2321	246.957	-2.4811	3.9554e-07	2.8983e-08	AVR78_RS12595	membrane protein
AVR78_RS12600	93.9932	752.868	-3.0018	4.2206e-36	8.8178e-37	AVR78_RS12600	histidine--tRNA ligase
AVR78_RS12605	82.9351	427.315	-2.3652	2.3375e-09	1.8605e-10	AVR78_RS12605	4-hydroxy-3-methylbut-2-en-1-yl diphosphate synthase (flavodoxin)
AVR78_RS12610	44.2321	392.567	-3.1498	2.4769e-22	3.2602e-23	AVR78_RS12610	cytoskeleton protein RodZ
AVR78_RS12615	116.109	449.653	-1.9533	0.00091929	5.7224e-05	AVR78_RS12615	bifunctional tRNA (adenosine(37)-C2)-methyltransferase TrmG/ribosomal RNA large subunit methyltransferase RlmN
AVR78_RS12620	16.587	500.947	-4.9165	2.6571e-64	1.3765e-64	AVR78_RS12620	nucleoside-diphosphate kinase
AVR78_RS12635	132.696	755.764	-2.5098	9.3605e-20	1.1234e-20	AVR78_RS12635	3-mercaptopyruvate sulfurtransferase
AVR78_RS12655	138.225	565.479	-2.0325	1.3009e-05	8.8835e-07	AVR78_RS12655	aminopeptidase PepB
AVR78_RS12670	149.283	300.734	-1.0104	6.139e-05	4.0511e-06	AVR78_RS12670	Fe-S protein assembly chaperone HscA
AVR78_RS12675	11.058	93.9017	-3.0861	3.8984e-06	2.7178e-07	hscB	co-chaperone HscB
AVR78_RS12680	22.116	249.026	-3.4931	9.1071e-19	1.0569e-19	AVR78_RS12680	iron-sulfur cluster assembly accessory protein
AVR78_RS12685	11.058	177.462	-4.0043	6.784e-18	7.6175e-19	AVR78_RS12685	Fe-S cluster assembly scaffold IscU
AVR78_RS12690	154.812	951.427	-2.6196	7.842e-29	1.2907e-29	AVR78_RS12690	IscS subfamily cysteine desulfurase
AVR78_RS12695	99.5222	657.726	-2.7244	1.9412e-23	2.6655e-24	AVR78_RS12695	Fe-S cluster assembly transcriptional regulator IscR
AVR78_RS12700	66.3481	588.644	-3.1493	1.181e-32	2.2111e-33	AVR78_RS12700	tRNA (cytosine(32)/uridine(32)-2'-O)-methyltransferase TrmJ
AVR78_RS12705	77.4061	509.22	-2.7178	2.3582e-18	2.6898e-19	AVR78_RS12705	inositol-1-monophosphatase
AVR78_RS12740	210.102	1806.06	-3.1037	1.0949e-92	1.0584e-92	AVR78_RS12740	serine hydroxymethyltransferase
AVR78_RS12760	82.9351	297.838	-1.8445	0.042078	0.0023789	AVR78_RS12760	nitrogen regulatory protein P-II
AVR78_RS12770	5.52901	62.8769	-3.5074	7.9682e-06	5.4847e-07	AVR78_RS12770	two-component system QseEF-associated lipoprotein QseG
AVR78_RS12780	342.799	779.757	-1.1857	3.0365e-05	2.0401e-06	AVR78_RS12780	phosphoribosylformylglycinamidine synthase
AVR78_RS12815	38.7031	81.4918	-1.0742	0.069934	0.0039026	AVR78_RS12815	pyridoxine 5'-phosphate synthase
AVR78_RS12825	44.2321	355.751	-3.0077	5.192e-18	5.8645e-19	AVR78_RS12825	GTPase Era
AVR78_RS12830	33.1741	277.569	-3.0647	3.9191e-15	3.9117e-16	AVR78_RS12830	ribonuclease 3
AVR78_RS12840	60.8191	220.069	-1.8554	0.071009	0.0039609	AVR78_RS12840	signal peptidase I
AVR78_RS12845	93.9932	606.431	-2.6897	8.304e-21	1.0358e-21	AVR78_RS12845	elongation factor 4
AVR78_RS12855	33.1741	471.577	-3.8294	2.8364e-41	7.0789e-42	AVR78_RS12855	sigma-E factor regulatory protein RseB
AVR78_RS12860	88.4641	1073.46	-3.601	1.1508e-80	8.6733e-81	AVR78_RS12860	anti-sigma-E factor RseA
AVR78_RS12865	215.631	1041.19	-2.2716	4.1968e-17	4.546e-18	AVR78_RS12865	RNA polymerase sigma factor RpoE
AVR78_RS12880	82.9351	396.704	-2.258	3.3091e-07	2.4368e-08	AVR78_RS12880	ATP-dependent RNA helicase SrmB
AVR78_RS12885	121.638	6446.13	-5.7278	0	0	AVR78_RS12885	autonomous glycyl radical cofactor GrcA
AVR78_RS12890	93.9932	203.523	-1.1146	0.0094497	0.00055654	AVR78_RS12890	uracil-DNA glycosylase
AVR78_RS12900	38.7031	212.623	-2.4578	4.0669e-06	2.8322e-07	AVR78_RS12900	thioredoxin TrxC
AVR78_RS12910	176.928	1216.59	-2.7816	4.9276e-45	1.4016e-45	AVR78_RS12910	protein lysine acetyltransferase
AVR78_RS12915	71.8771	512.943	-2.8352	3.4761e-21	4.4037e-22	pssA	phosphatidylserine synthase
AVR78_RS12950	530.785	2558.93	-2.2693	1.7166e-39	4.0279e-40	AVR78_RS12950	ATP-dependent chaperone ClpB
AVR78_RS12960	27.645	192.767	-2.8018	1.3868e-08	1.0746e-09	AVR78_RS12960	23S rRNA pseudouridine(1911/1915/1917) synthase RluD
AVR78_RS12965	33.1741	747.491	-4.4939	1.8753e-84	1.5635e-84	AVR78_RS12965	outer membrane protein assembly factor BamD
AVR78_RS12975	55.2901	16798.5	-8.2471	0	0	AVR78_RS12975	translation inhibitor protein RaiA
AVR78_RS12980	71.8771	259.781	-1.8537	0.050949	0.0028659	AVR78_RS12980	bifunctional chorismate mutase/prephenate dehydratase
AVR78_RS12985	99.5222	218.415	-1.134	0.01059	0.00062097	AVR78_RS12985	SMP-30/gluconolactonase/LRE family protein
AVR78_RS13000	27.645	163.397	-2.5633	9.8753e-06	6.7729e-07	AVR78_RS13000	DUF4154 domain-containing protein
AVR78_RS13030	55.2901	723.085	-3.7091	1.7933e-58	7.8563e-59	AVR78_RS13030	50S ribosomal protein L19
AVR78_RS13035	105.051	1443.27	-3.7802	1.9687e-119	2.7644e-119	AVR78_RS13035	tRNA (guanosine(37)-N1)-methyltransferase TrmD
AVR78_RS13040	82.9351	1198.8	-3.8535	2.1643e-103	2.416e-103	rimM	ribosome maturation factor RimM
AVR78_RS13045	11.058	268.054	-4.5994	1.9746e-32	3.6609e-33	AVR78_RS13045	30S ribosomal protein S16
AVR78_RS13050	232.218	807.472	-1.7979	0.0041499	0.00025009	AVR78_RS13050	signal recognition particle protein
AVR78_RS13055	49.7611	110.448	-1.1503	0.082078	0.0045583	AVR78_RS13055	inner membrane protein YpjD
AVR78_RS13065	105.051	641.593	-2.6106	1.0164e-19	1.2171e-20	AVR78_RS13065	nucleotide exchange factor GrpE
AVR78_RS13075	66.3481	133.613	-1.0099	0.007501	0.00044413	ppnK	NAD(+) kinase
AVR78_RS13090	66.3481	477.782	-2.8482	3.9896e-20	4.8848e-21	AVR78_RS13090	outer membrane protein assembly factor BamE
AVR78_RS13100	77.4061	292.46	-1.9177	0.013888	0.00080725	AVR78_RS13100	ubiquinone-binding protein
AVR78_RS13105	38.7031	432.692	-3.4828	3.2798e-31	5.8336e-32	AVR78_RS13105	SsrA-binding protein
AVR78_RS13110	1459.66	240582	-7.3648	0	0	ssrA	transfer-messenger RNA
AVR78_RS13265	105.051	1095.8	-3.3828	2.8859e-71	1.7741e-71	AVR78_RS13265	DUF4325 domain-containing protein
AVR78_RS13275	132.696	505.911	-1.9308	0.00084202	5.2525e-05	AVR78_RS13275	DUF262 domain-containing protein
AVR78_RS13440	60.8191	605.19	-3.3148	3.1463e-38	7.0126e-39	AVR78_RS13440	transcriptional regulator
AVR78_RS13550	5.52901	34.3341	-2.6345	0.032366	0.0018412	AVR78_RS13550	NAD(P)H dehydrogenase (quinone)
AVR78_RS13560	60.8191	135.268	-1.1532	0.05632	0.0031607	AVR78_RS13560	phosphatase
AVR78_RS13585	33.1741	207.659	-2.6461	1.1121e-07	8.3508e-09	AVR78_RS13585	L-alanine exporter AlaE
AVR78_RS13595	71.8771	676.754	-3.235	5.1754e-40	1.2328e-40	AVR78_RS13595	hypothetical protein
AVR78_RS13660	33.1741	390.085	-3.5557	1.2885e-29	2.1827e-30	AVR78_RS13660	transcriptional regulator
AVR78_RS13690	33.1741	390.085	-3.5557	1.2885e-29	2.1827e-30	AVR78_RS13690	S-ribosylhomocysteine lyase
AVR78_RS13705	44.2321	387.189	-3.1299	1.0987e-21	1.4133e-22	AVR78_RS13705	fructose-1-phosphate/6-phosphogluconate phosphatase
AVR78_RS13710	55.2901	268.054	-2.2774	1.7508e-05	1.1898e-06	AVR78_RS13710	BON domain-containing protein
AVR78_RS13725	0	14.0646	-4.814	0.0051086	0.00030615	AVR78_RS13725	tRNA-Arg
AVR78_RS13730	0	69.9092	-7.1274	9.9614e-13	9.0581e-14	AVR78_RS13730	tRNA-Arg
AVR78_RS13735	0	31.8521	-5.9933	3.0038e-06	2.1023e-07	AVR78_RS13735	tRNA-Arg
AVR78_RS13745	105.051	1153.71	-3.4571	6.4146e-79	4.6379e-79	AVR78_RS13745	carbon storage regulator
AVR78_RS13755	348.328	1293.11	-1.8923	1.2214e-06	8.7316e-08	AVR78_RS13755	alanine--tRNA ligase
AVR78_RS13765	93.9932	2489.02	-4.7269	8.6788e-297	3.6179e-296	AVR78_RS13765	DNA recombination/repair protein RecA
AVR78_RS14045	66.3481	489.778	-2.884	2.1514e-21	2.7438e-22	AVR78_RS14045	LacI family transcriptional regulator
AVR78_RS14130	44.2321	431.451	-3.286	3.7439e-27	5.8618e-28	AVR78_RS14130	MarR family transcriptional regulator
AVR78_RS14150	281.979	2756.66	-3.2893	2.1547e-164	4.5266e-164	AVR78_RS14150	RNA polymerase sigma factor RpoS
AVR78_RS14155	110.58	2891.92	-4.7089	0	0	nlpD	murein hydrolase activator NlpD
AVR78_RS14175	0	52.1217	-6.7038	9.1029e-10	7.3639e-11	AVR78_RS14175	2-C-methyl-D-erythritol 2%2C4-cyclodiphosphate synthase
AVR78_RS14185	55.2901	123.272	-1.1568	0.071225	0.0039713	AVR78_RS14185	cell division protein FtsB
AVR78_RS14240	116.109	640.765	-2.4643	8.4468e-16	8.6443e-17	AVR78_RS14240	7-carboxy-7-deazaguanine synthase QueE
AVR78_RS14250	199.044	2194.49	-3.4627	5.6617e-149	1.049e-148	AVR78_RS14250	enolase
AVR78_RS14255	265.392	1908.23	-2.846	3.6866e-75	2.4467e-75	pyrG	CTP synthetase
AVR78_RS14265	304.096	653.175	-1.1029	1.6829e-06	1.1907e-07	AVR78_RS14265	GTP diphosphokinase
AVR78_RS14300	93.9932	382.639	-2.0254	0.00040091	2.5358e-05	AVR78_RS14300	flavodoxin
AVR78_RS14315	33.1741	166.293	-2.3256	0.00035423	2.2459e-05	AVR78_RS14315	SecY-interacting protein
AVR78_RS14320	44.2321	344.582	-2.9617	9.3961e-17	1.0011e-17	AVR78_RS14320	NADPH-dependent 7-cyano-7-deazaguanine reductase QueF
AVR78_RS14325	71.8771	749.973	-3.3832	2.3321e-49	7.653e-50	AVR78_RS14325	LOG family protein
AVR78_RS14330	82.9351	2271.84	-4.7757	1.0389e-274	3.7454e-274	AVR78_RS14330	serine transporter
AVR78_RS14335	71.8771	901.374	-3.6485	5.6091e-70	3.3182e-70	AVR78_RS14335	L-serine ammonia-lyase
AVR78_RS14450	5.52901	41.7801	-2.9177	0.0047066	0.00028263	AVR78_RS14450	membrane protein
AVR78_RS14455	116.109	588.23	-2.3409	8.4476e-12	7.4358e-13	AVR78_RS14455	transcriptional regulator GcvA
AVR78_RS14460	88.4641	196.077	-1.1483	0.019817	0.0011409	AVR78_RS14460	YgdI/YgdR family lipoprotein
AVR78_RS14465	71.8771	153.883	-1.0982	0.018725	0.0010795	AVR78_RS14465	cysteine desulfurase CsdA
AVR78_RS14605	0	8.27328	-4.0485	0.060154	0.0033645	AVR78_RS14605	propanediol utilization microcompartment protein PduA
AVR78_RS14740	143.754	301.975	-1.0708	0.00043701	2.759e-05	AVR78_RS14740	pitrilysin
AVR78_RS14755	0	7.85961	-3.9745	0.071692	0.0039948	AVR78_RS14755	hypothetical protein
AVR78_RS14770	44.2321	188.631	-2.0924	0.0052322	0.0003132	AVR78_RS14770	thymidylate synthase
AVR78_RS14775	44.2321	187.803	-2.0861	0.0058235	0.00034774	AVR78_RS14775	prolipoprotein diacylglyceryl transferase
AVR78_RS14780	298.566	1289.8	-2.111	5.3277e-14	5.1019e-15	AVR78_RS14780	phosphoenolpyruvate--protein phosphotransferase PtsP
AVR78_RS14785	60.8191	3107.44	-5.6751	0	0	AVR78_RS14785	RNA pyrophosphohydrolase
AVR78_RS14805	33.1741	632.078	-4.252	6.7479e-66	3.6816e-66	AVR78_RS14805	YgdI/YgdR family lipoprotein
AVR78_RS14830	127.167	687.923	-2.4355	4.643e-16	4.7994e-17	AVR78_RS14830	HTH-type transcriptional regulator GalR
AVR78_RS14840	82.9351	172.498	-1.0565	0.0060255	0.00035924	AVR78_RS14840	transcriptional regulator
AVR78_RS14920	132.696	288.737	-1.1216	0.0023996	0.00014653	AVR78_RS14920	transcriptional regulator
AVR78_RS14975	44.2321	459.167	-3.3759	9.9885e-31	1.7555e-31	AVR78_RS14975	hypothetical protein
AVR78_RS14985	82.9351	531.972	-2.6813	3.0069e-18	3.4181e-19	AVR78_RS14985	EAL domain-containing protein
AVR78_RS14995	187.986	791.753	-2.0744	2.7865e-08	2.1387e-09	AVR78_RS14995	fimbrial adhesin protein precursor
AVR78_RS15000	127.167	1501.19	-3.5613	2.4937e-109	3.1531e-109	AVR78_RS15000	fimbrial biogenesis outer membrane usher protein
AVR78_RS15005	22.116	534.454	-4.5949	7.6965e-63	3.7746e-63	AVR78_RS15005	molecular chaperone
AVR78_RS15010	27.645	10608.8	-8.584	0	0	AVR78_RS15010	type 1 fimbrial protein
AVR78_RS15015	16.587	324.726	-4.2911	3.2806e-35	6.6661e-36	AVR78_RS15015	DUF1471 domain-containing protein
AVR78_RS15075	93.9932	1075.11	-3.5158	1.3862e-76	9.5316e-77	fimA	type 1 fimbriae major subunit FimA
AVR78_RS15145	60.8191	645.729	-3.4083	1.6913e-43	4.5671e-44	AVR78_RS15145	DUF1889 domain-containing protein
AVR78_RS15150	254.334	614.705	-1.2732	0.0062489	0.00037205	AVR78_RS15150	MFS transporter
AVR78_RS15180	55.2901	326.795	-2.5633	4.0816e-10	3.3455e-11	AVR78_RS15180	hypothetical protein
AVR78_RS15225	38.7031	164.638	-2.0888	0.0095029	0.00055943	AVR78_RS15225	hypothetical protein
AVR78_RS15235	132.696	542.313	-2.031	2.06e-05	1.3952e-06	AVR78_RS15235	lysine--tRNA ligase
AVR78_RS15240	60.8191	524.94	-3.1096	2.5369e-28	4.0921e-29	AVR78_RS15240	peptide chain release factor 2
AVR78_RS15250	27.645	114.585	-2.0513	0.042331	0.0023912	AVR78_RS15250	bifunctional protein-disulfide isomerase/oxidoreductase DsbC
AVR78_RS15255	127.167	276.328	-1.1197	0.002836	0.00017247	AVR78_RS15255	site-specific tyrosine recombinase XerD
AVR78_RS15260	38.7031	184.08	-2.2498	0.00057582	3.619e-05	AVR78_RS15260	flavodoxin FldB
AVR78_RS15275	165.87	385.121	-1.2153	0.0076093	0.00045044	AVR78_RS15275	folate-binding protein
AVR78_RS15280	143.754	335.895	-1.2244	0.015632	0.00090642	AVR78_RS15280	hemolysin III family protein
AVR78_RS15300	11.058	115.826	-3.3888	6.0557e-09	4.7574e-10	AVR78_RS15300	hypothetical protein
AVR78_RS15325	243.276	790.925	-1.7009	0.068821	0.0038412	AVR78_RS15325	aminomethyl-transferring glycine dehydrogenase
AVR78_RS15330	38.7031	177.048	-2.1936	0.0016823	0.00010354	AVR78_RS15330	glycine cleavage system protein H
AVR78_RS15350	49.7611	461.649	-3.2137	2.2883e-27	3.6018e-28	AVR78_RS15350	Xaa-Pro aminopeptidase
AVR78_RS15355	49.7611	344.582	-2.7918	4.6722e-14	4.4855e-15	AVR78_RS15355	YecA family protein
AVR78_RS15360	66.3481	872.831	-3.7176	1.5453e-70	9.2647e-71	AVR78_RS15360	cell division protein ZapA
AVR78_RS15365	27.645	704.056	-4.6706	4.9444e-84	4.0715e-84	ssrS	6S RNA
AVR78_RS15395	132.696	1120.2	-3.0776	8.1076e-57	3.3381e-57	AVR78_RS15395	oxidative stress defense protein
AVR78_RS15410	44.2321	471.163	-3.4131	2.6352e-32	4.8419e-33	AVR78_RS15410	mechanosensitive ion channel protein MscS
AVR78_RS15415	105.051	2708.26	-4.6882	0	0	AVR78_RS15415	class II fructose-bisphosphate aldolase
AVR78_RS15420	99.5222	2466.68	-4.6314	3.4848e-286	1.3474e-285	AVR78_RS15420	phosphoglycerate kinase
AVR78_RS15525	60.8191	258.126	-2.0855	0.0012385	7.6576e-05	AVR78_RS15525	agmatinase
AVR78_RS15530	226.689	891.859	-1.9761	9.4451e-07	6.7758e-08	AVR78_RS15530	biosynthetic arginine decarboxylase
AVR78_RS15545	110.58	403.736	-1.8683	0.011123	0.00065121	AVR78_RS15545	methionine adenosyltransferase
AVR78_RS15565	27.645	126.168	-2.1902	0.0082991	0.00048975	AVR78_RS15565	16S rRNA (uracil(1498)-N(3))-methyltransferase
AVR78_RS15575	44.2321	165.466	-1.9034	0.0742	0.004132	AVR78_RS15575	DUF179 domain-containing protein
AVR78_RS15730	99.5222	217.587	-1.1285	0.0096437	0.00056659	AVR78_RS15730	PLP-dependent aminotransferase family protein
AVR78_RS15750	138.225	277.569	-1.0058	0.00010155	6.6273e-06	AVR78_RS15750	glutathione-dependent disulfide-bond oxidoreductase
AVR78_RS15770	22.116	131.545	-2.5724	6.482e-05	4.2753e-06	AVR78_RS15770	TonB system transport protein ExbD
AVR78_RS15775	55.2901	380.984	-2.7846	2.9278e-15	2.9333e-16	AVR78_RS15775	biopolymer transporter ExbB
AVR78_RS15790	77.4061	332.586	-2.1032	0.00016142	1.0443e-05	AVR78_RS15790	DedA family protein
AVR78_RS15820	82.9351	186.976	-1.1728	0.033857	0.0019211	AVR78_RS15820	1-acylglycerol-3-phosphate O-acyltransferase
AVR78_RS15855	71.8771	808.299	-3.4913	4.0659e-57	1.7003e-57	AVR78_RS15855	antibiotic biosynthesis monooxygenase
AVR78_RS15865	16.587	90.5924	-2.4493	0.0028401	0.00017268	AVR78_RS15865	esterase YqiA
AVR78_RS15870	27.645	640.352	-4.5338	1.5418e-73	9.9599e-74	AVR78_RS15870	3'%2C5'-cyclic-AMP phosphodiesterase
AVR78_RS15885	187.986	1609.57	-3.098	2.2382e-82	1.7563e-82	AVR78_RS15885	outer membrane channel protein TolC
AVR78_RS15890	66.3481	1122.27	-4.0802	9.5091e-108	1.1855e-107	AVR78_RS15890	membrane protein
AVR78_RS15895	160.341	1056.08	-2.7195	2.0918e-36	4.4047e-37	AVR78_RS15895	glutathionylspermidine synthase family protein
AVR78_RS15910	82.9351	1067.25	-3.6858	2.6066e-84	2.1597e-84	AVR78_RS15910	3%2C4-dihydroxy-2-butanone-4-phosphate synthase
AVR78_RS15920	82.9351	2208.55	-4.735	3.6303e-264	1.226e-263	AVR78_RS15920	cell surface composition regulator GlgS
AVR78_RS15945	55.2901	263.918	-2.255	3.3466e-05	2.2439e-06	AVR78_RS15945	hypothetical protein
AVR78_RS16030	27.645	1844.94	-6.0604	1.2443e-278	4.6107e-278	AVR78_RS16030	30S ribosomal protein S21
AVR78_RS16040	326.212	2226.34	-2.7708	7.3628e-80	5.4115e-80	AVR78_RS16040	RNA polymerase sigma factor RpoD
AVR78_RS16155	71.8771	329.69	-2.1975	1.6392e-05	1.1153e-06	AVR78_RS16155	PadR family transcriptional regulator
AVR78_RS16235	71.8771	504.67	-2.8117	2.4839e-20	3.0553e-21	AVR78_RS16235	gfo/Idh/MocA family oxidoreductase
AVR78_RS16270	99.5222	627.115	-2.6556	1.5751e-20	1.9464e-21	AVR78_RS16270	GntR family transcriptional regulator
AVR78_RS16285	11.058	294.942	-4.7373	6.6691e-37	1.4234e-37	AVR78_RS16285	DUF1090 domain-containing protein
AVR78_RS16290	5.52901	143.128	-4.6941	1.5405e-18	1.77e-19	AVR78_RS16290	DUF883 domain-containing protein
AVR78_RS16300	22.116	98.452	-2.1543	0.02658	0.0015198	AVR78_RS16300	hypothetical protein
AVR78_RS16345	530.785	84200.1	-7.3096	0	0	rnpB	RNase P RNA component class A
AVR78_RS16365	77.4061	289.978	-1.9054	0.017503	0.0010112	AVR78_RS16365	sugar kinase
AVR78_RS16435	121.638	263.504	-1.1152	0.0031966	0.00019392	AVR78_RS16435	penicillin-binding protein activator
AVR78_RS16450	55.2901	283.36	-2.3575	1.4027e-06	9.9932e-08	AVR78_RS16450	osmotically-inducible protein OsmY
AVR78_RS16510	182.457	1734.91	-3.2492	6.4456e-101	6.9904e-101	AVR78_RS16510	DEAD/DEAH family ATP-dependent RNA helicase
AVR78_RS16515	215.631	3754	-4.1218	0	0	AVR78_RS16515	lipoprotein NlpI
AVR78_RS16520	293.037	4322.37	-3.8827	0	0	AVR78_RS16520	polyribonucleotide nucleotidyltransferase
AVR78_RS16530	22.116	1234.37	-5.8025	5.2812e-182	1.2469e-181	AVR78_RS16530	30S ribosomal protein S15
AVR78_RS16545	370.444	1913.2	-2.3687	7.0707e-37	1.5072e-37	AVR78_RS16545	translation initiation factor IF-2
AVR78_RS16550	132.696	888.136	-2.7427	8.5577e-32	1.5427e-32	nusA	transcription termination/antitermination protein NusA
AVR78_RS16555	44.2321	400.84	-3.1799	2.448e-23	3.3494e-24	AVR78_RS16555	ribosome maturation factor RimP
AVR78_RS16570	138.225	277.569	-1.0058	0.00010155	6.6273e-06	AVR78_RS16570	argininosuccinate synthase
AVR78_RS16575	22.116	114.585	-2.3733	0.0018207	0.00011167	AVR78_RS16575	Crp/Fnr family transcriptional regulator
AVR78_RS16595	71.8771	1239.75	-4.1084	2.8949e-120	4.1302e-120	AVR78_RS16595	preprotein translocase subunit SecG
AVR78_RS16600	149.283	303.216	-1.0223	8.6754e-05	5.6785e-06	AVR78_RS16600	phosphoglucosamine mutase
AVR78_RS16610	375.973	3036.71	-3.0138	7.0633e-142	1.2647e-141	hflB	ATP-dependent zinc metalloprotease FtsH
AVR78_RS16615	160.341	750.386	-2.2265	1.4569e-11	1.269e-12	AVR78_RS16615	23S rRNA (uridine(2552)-2'-O)-methyltransferase
AVR78_RS16620	11.058	103.416	-3.2253	2.5483e-07	1.8869e-08	AVR78_RS16620	hypothetical protein
AVR78_RS16630	132.696	467.027	-1.8154	0.020468	0.0011779	AVR78_RS16630	transcription elongation factor GreA
AVR78_RS16650	27.645	785.134	-4.8278	1.5034e-97	1.5607e-97	AVR78_RS16650	50S ribosomal protein L27
AVR78_RS16655	60.8191	1614.12	-4.7301	2.374e-193	5.8646e-193	AVR78_RS16655	50S ribosomal protein L21
AVR78_RS16660	110.58	517.494	-2.2264	2.0625e-08	1.5922e-09	AVR78_RS16660	octaprenyl-diphosphate synthase
AVR78_RS16680	11.058	53.7763	-2.2819	0.053179	0.0029901	AVR78_RS16680	STAS domain-containing protein
AVR78_RS16685	38.7031	261.436	-2.7559	1.357e-10	1.1306e-11	AVR78_RS16685	phospholipid-binding protein MlaC
AVR78_RS16710	110.58	264.745	-1.2595	0.058457	0.0032758	AVR78_RS16710	arabinose-5-phosphate isomerase KdsD
AVR78_RS16720	33.1741	148.092	-2.1584	0.0062252	0.00037072	AVR78_RS16720	LPS export ABC transporter periplasmic protein LptC
AVR78_RS16725	22.116	141.473	-2.6774	7.478e-06	5.1486e-07	AVR78_RS16725	lipopolysaccharide ABC transporter substrate-binding protein LptA
AVR78_RS16730	60.8191	271.364	-2.1576	0.0002161	1.3876e-05	AVR78_RS16730	ABC transporter ATP-binding protein
AVR78_RS16735	143.754	791.753	-2.4614	4.551e-19	5.3371e-20	AVR78_RS16735	RNA polymerase sigma-54 factor
AVR78_RS16740	0	160.088	-8.3227	1.7952e-26	2.7385e-27	AVR78_RS16740	ribosome hibernation promoting factor
AVR78_RS16745	27.645	264.745	-3.2595	6.061e-17	6.5336e-18	AVR78_RS16745	PTS IIA-like nitrogen regulatory protein PtsN
AVR78_RS16840	55.2901	282.119	-2.3512	1.7338e-06	1.2257e-07	AVR78_RS16840	ClpXP protease specificity-enhancing factor
AVR78_RS16845	66.3481	1031.68	-3.9588	6.1658e-94	6.0701e-94	sspA	stringent starvation protein A
AVR78_RS16855	66.3481	1176.46	-4.1483	3.8469e-116	5.1575e-116	AVR78_RS16855	30S ribosomal protein S9
AVR78_RS16860	38.7031	2980.86	-6.2671	0	0	AVR78_RS16860	50S ribosomal protein L13
AVR78_RS16865	93.9932	194.836	-1.0516	0.0031659	0.0001921	AVR78_RS16865	cell division protein ZapE
AVR78_RS16870	77.4061	1246.78	-4.0096	8.232e-116	1.0927e-115	AVR78_RS16870	hypothetical protein
AVR78_RS16875	143.754	611.395	-2.0885	5.8553e-07	4.2473e-08	AVR78_RS16875	serine endoprotease DegQ
AVR78_RS16885	221.16	1600.05	-2.855	5.8302e-64	2.9856e-64	AVR78_RS16885	malate dehydrogenase
AVR78_RS16895	0	205.177	-8.6807	8.6336e-33	1.6244e-33	AVR78_RS16895	DUF1471 domain-containing protein
AVR78_RS16915	27.645	295.77	-3.4194	5.6499e-21	7.0902e-22	AVR78_RS16915	p-hydroxybenzoic acid efflux pump subunit AaeA
AVR78_RS16920	0	33.5068	-6.0664	1.5276e-06	1.0828e-07	AVR78_RS16920	protein AaeX
AVR78_RS16930	304.096	634.974	-1.0622	1.9631e-07	1.4577e-08	AVR78_RS16930	metalloprotease TldD
AVR78_RS16960	165.87	679.236	-2.0339	1.6603e-06	1.1753e-07	AVR78_RS16960	rod shape-determining protein
AVR78_RS16990	38.7031	153.056	-1.9835	0.039179	0.0022174	AVR78_RS16990	type II 3-dehydroquinate dehydratase
AVR78_RS16995	60.8191	129.063	-1.0855	0.026371	0.0015082	AVR78_RS16995	acetyl-CoA carboxylase biotin carboxyl carrier protein
AVR78_RS17000	99.5222	392.981	-1.9814	0.0010019	6.2262e-05	AVR78_RS17000	acetyl-CoA carboxylase biotin carboxylase subunit
AVR78_RS17005	0	8.68694	-4.1188	0.050462	0.0028391	AVR78_RS17005	hypothetical protein
AVR78_RS17025	116.109	759.487	-2.7095	2.5766e-26	3.9192e-27	AVR78_RS17025	tRNA dihydrouridine synthase DusB
AVR78_RS17030	49.7611	110.448	-1.1503	0.082078	0.0045583	fis	Fis family transcriptional regulator
AVR78_RS17090	127.167	298.252	-1.2298	0.025335	0.0014492	AVR78_RS17090	shikimate dehydrogenase
AVR78_RS17095	33.1741	157.606	-2.2482	0.0014767	9.1134e-05	AVR78_RS17095	L-threonylcarbamoyladenylate synthase type 1 TsaC
AVR78_RS17100	55.2901	469.095	-3.0848	6.1399e-25	8.8259e-26	AVR78_RS17100	DNA topoisomerase I-like protein
AVR78_RS17105	60.8191	1283.19	-4.3991	4.2746e-139	7.2641e-139	AVR78_RS17105	DUF494 domain-containing protein
AVR78_RS17115	127.167	1058.15	-3.0567	9.6403e-53	3.5525e-53	AVR78_RS17115	peptide deformylase
AVR78_RS17120	77.4061	656.485	-3.0842	3.1961e-34	6.3163e-35	AVR78_RS17120	methionyl-tRNA formyltransferase
AVR78_RS17125	60.8191	244.889	-2.0095	0.0060037	0.0003581	AVR78_RS17125	16S rRNA (cytosine(967)-C(5))-methyltransferase RsmB
AVR78_RS17135	88.4641	369.402	-2.062	0.00020379	1.3108e-05	AVR78_RS17135	large-conductance mechanosensitive channel protein MscL
AVR78_RS17155	22.116	653.175	-4.8843	1.2479e-82	9.9089e-83	AVR78_RS17155	50S ribosomal protein L17
AVR78_RS17160	93.9932	3010.23	-5.0012	0	0	AVR78_RS17160	DNA-directed RNA polymerase subunit alpha
AVR78_RS17165	77.4061	1641.83	-4.4067	6.8789e-178	1.5959e-177	AVR78_RS17165	30S ribosomal protein S4
AVR78_RS17170	0	711.502	-10.475	3.7042e-92	3.4921e-92	AVR78_RS17170	30S ribosomal protein S11
AVR78_RS17175	11.058	858.353	-6.2784	3.9368e-133	6.4045e-133	AVR78_RS17175	30S ribosomal protein S13
AVR78_RS17180	0	151.815	-8.2462	2.7981e-25	4.104e-26	AVR78_RS17180	50S ribosomal protein L36
AVR78_RS17185	132.696	2971.35	-4.4849	0	0	AVR78_RS17185	preprotein translocase subunit SecY
AVR78_RS17190	49.7611	985.761	-4.3081	6.9231e-104	7.7935e-104	AVR78_RS17190	50S ribosomal protein L15
AVR78_RS17200	88.4641	729.29	-3.0433	1.9577e-36	4.129e-37	AVR78_RS17200	30S ribosomal protein S5
AVR78_RS17205	5.52901	271.777	-5.6193	1.442e-40	3.5006e-41	AVR78_RS17205	50S ribosomal protein L18
AVR78_RS17210	16.587	948.118	-5.8369	7.7633e-141	1.3449e-140	AVR78_RS17210	50S ribosomal protein L6
AVR78_RS17215	5.52901	797.13	-7.1717	3.5438e-128	5.4337e-128	AVR78_RS17215	30S ribosomal protein S8
AVR78_RS17220	11.058	447.998	-5.3403	6.4649e-63	3.1823e-63	AVR78_RS17220	30S ribosomal protein S14
AVR78_RS17225	11.058	1321.24	-6.9007	3.7057e-210	1.0088e-209	AVR78_RS17225	50S ribosomal protein L5
AVR78_RS17230	16.587	529.904	-4.9976	3.3673e-69	1.9658e-69	AVR78_RS17230	50S ribosomal protein L24
AVR78_RS17235	38.7031	1590.54	-5.3609	2.9997e-219	8.4243e-219	AVR78_RS17235	50S ribosomal protein L14
AVR78_RS17245	0	10.7553	-4.427	0.020923	0.001202	AVR78_RS17245	50S ribosomal protein L29
AVR78_RS17250	5.52901	456.271	-6.3667	4.1692e-72	2.6296e-72	AVR78_RS17250	50S ribosomal protein L16
AVR78_RS17255	49.7611	1112.76	-4.483	2.4343e-124	3.6283e-124	AVR78_RS17255	30S ribosomal protein S3
AVR78_RS17260	55.2901	276.328	-2.3213	4.5838e-06	3.1839e-07	AVR78_RS17260	50S ribosomal protein L22
AVR78_RS17265	0	130.304	-8.0257	4.0163e-22	5.25e-23	AVR78_RS17265	30S ribosomal protein S19
AVR78_RS17270	55.2901	1326.62	-4.5846	1.0993e-152	2.1253e-152	AVR78_RS17270	50S ribosomal protein L2
AVR78_RS17275	22.116	177.048	-3.001	1.1974e-09	9.6423e-11	AVR78_RS17275	50S ribosomal protein L23
AVR78_RS17280	93.9932	762.383	-3.0199	3.5351e-37	7.5939e-38	AVR78_RS17280	50S ribosomal protein L4
AVR78_RS17285	55.2901	1116.07	-4.3353	1.5726e-118	2.1739e-118	AVR78_RS17285	50S ribosomal protein L3
AVR78_RS17290	77.4061	1526.42	-4.3016	2.1042e-159	4.3184e-159	AVR78_RS17290	30S ribosomal protein S10
AVR78_RS17300	110.58	476.541	-2.1075	5.4399e-06	3.7668e-07	AVR78_RS17300	bacterioferritin
AVR78_RS17305	38.7031	245.716	-2.6665	4.67e-09	3.6807e-10	AVR78_RS17305	bacterioferritin-associated ferredoxin
AVR78_RS17310	0	9.92793	-4.3115	0.029763	0.0016953	AVR78_RS17310	elongation factor Tu
AVR78_RS17315	210.102	4842.35	-4.5265	0	0	AVR78_RS17315	elongation factor G
AVR78_RS17320	11.058	907.165	-6.3582	2.2085e-141	3.8511e-141	AVR78_RS17320	30S ribosomal protein S7
AVR78_RS17325	33.1741	1243.06	-5.2277	1.1835e-167	2.5671e-167	AVR78_RS17325	30S ribosomal protein S12
AVR78_RS17340	0	20.6832	-5.3704	0.00031	1.9748e-05	AVR78_RS17340	sulfurtransferase TusD
AVR78_RS17345	44.2321	258.126	-2.5449	4.4134e-08	3.3642e-09	AVR78_RS17345	hypothetical protein
AVR78_RS17350	193.515	1034.57	-2.4185	1.1265e-22	1.5057e-23	AVR78_RS17350	FKBP-type peptidyl-prolyl cis-trans isomerase
AVR78_RS17360	121.638	1314.62	-3.434	2.954e-88	2.6183e-88	AVR78_RS17360	peptidylprolyl isomerase
AVR78_RS17365	0	13.6509	-4.7709	0.0060923	0.00036305	AVR78_RS17365	hypothetical protein
AVR78_RS17390	49.7611	277.569	-2.4798	7.8802e-08	5.9524e-09	AVR78_RS17390	hydrolase
AVR78_RS17400	110.58	260.195	-1.2345	0.039886	0.0022569	AVR78_RS17400	phosphoribulokinase
AVR78_RS17415	105.051	2911.37	-4.7925	0	0	AVR78_RS17415	cAMP-activated global transcriptional regulator CRP
AVR78_RS17445	110.58	840.979	-2.927	3.2319e-37	6.9705e-38	AVR78_RS17445	peptidylprolyl isomerase A
AVR78_RS17485	60.8191	136.095	-1.162	0.061837	0.0034565	AVR78_RS17485	ribulose-phosphate 3-epimerase
AVR78_RS17500	154.812	609.741	-1.9777	4.7621e-05	3.162e-06	AVR78_RS17500	3-dehydroquinate synthase
AVR78_RS17505	66.3481	340.032	-2.3575	1.2559e-07	9.3988e-09	AVR78_RS17505	shikimate kinase
AVR78_RS17575	149.283	1405.22	-3.2347	3.8851e-81	2.9615e-81	AVR78_RS17575	phosphoenolpyruvate carboxykinase (ATP)
AVR78_RS17600	0	63.7042	-6.9933	1.0449e-11	9.146e-13	feoA	ferrous iron transporter A
AVR78_RS17630	49.7611	447.584	-3.1691	1.2129e-25	1.7978e-26	AVR78_RS17630	Fe-S biogenesis protein NfuA
AVR78_RS17650	331.741	3222.44	-3.28	1.8458e-190	4.5179e-190	AVR78_RS17650	transcriptional regulator
AVR78_RS17660	105.051	224.206	-1.0937	0.0041145	0.00024808	AVR78_RS17660	rhomboid family intramembrane serine protease GlpG
AVR78_RS17665	16.587	203.523	-3.6171	8.6379e-17	9.2145e-18	AVR78_RS17665	thiosulfate sulfurtransferase
AVR78_RS17695	237.747	532.799	-1.1642	0.0002398	1.5346e-05	AVR78_RS17695	1%2C4-alpha-glucan-branching protein
AVR78_RS17700	149.283	777.688	-2.3811	2.6238e-16	2.7344e-17	AVR78_RS17700	aspartate-semialdehyde dehydrogenase
AVR78_RS17720	127.167	474.886	-1.9009	0.0026512	0.00016156	AVR78_RS17720	transcriptional regulator
AVR78_RS17755	66.3481	339.204	-2.354	1.4455e-07	1.0796e-08	AVR78_RS17755	DUF2756 domain-containing protein
AVR78_RS17820	5.52901	48.8123	-3.1422	0.00063637	3.9939e-05	AVR78_RS17820	aspartate 1-decarboxylase autocleavage activator PanM
AVR78_RS17845	105.051	2885.72	-4.7798	0	0	AVR78_RS17845	RNA polymerase sigma factor RpoH
AVR78_RS17860	243.276	923.298	-1.9242	8.9559e-06	6.1566e-07	AVR78_RS17860	signal recognition particle-docking protein FtsY
AVR78_RS17870	5.52901	34.7478	-2.6518	0.029257	0.0016693	AVR78_RS17870	hypothetical protein
AVR78_RS17900	165.87	1555.38	-3.2291	3.317e-89	3.0101e-89	AVR78_RS17900	hypothetical protein
AVR78_RS18045	215.631	511.289	-1.2456	0.005615	0.00033566	AVR78_RS18045	inorganic phosphate transporter
AVR78_RS18055	154.812	1595.5	-3.3654	1.2739e-101	1.4044e-101	AVR78_RS18055	universal stress protein UspA
AVR78_RS18070	199.044	976.247	-2.2942	6.4118e-17	6.9089e-18	AVR78_RS18070	oligopeptidase A
AVR78_RS18080	60.8191	383.466	-2.6565	3.6769e-13	3.4074e-14	AVR78_RS18080	23S rRNA (adenine(2030)-N(6))-methyltransferase RlmJ
AVR78_RS18120	121.638	280.05	-1.2031	0.017917	0.0010344	AVR78_RS18120	inner membrane protein YhjD
AVR78_RS18150	237.747	570.029	-1.2616	0.0058731	0.00035046	AVR78_RS18150	C4-dicarboxylate transporter
AVR78_RS18190	0	29.7838	-5.8965	7.0217e-06	4.8445e-07	AVR78_RS18190	hypothetical protein
AVR78_RS18270	276.45	668.067	-1.273	0.0043322	0.00026079	AVR78_RS18270	ABC transporter substrate-binding protein
AVR78_RS18360	176.928	394.222	-1.1558	0.0012177	7.5328e-05	AVR78_RS18360	DUF3053 domain-containing protein
AVR78_RS18370	33.1741	273.018	-3.0409	1.3283e-14	1.3039e-15	AVR78_RS18370	transcriptional regulator
AVR78_RS18375	55.2901	3832.18	-6.115	0	0	AVR78_RS18375	cold-shock protein
AVR78_RS18390	248.805	906.338	-1.865	0.00016393	1.06e-05	AVR78_RS18390	glycine--tRNA ligase subunit beta
AVR78_RS18395	93.9932	549.346	-2.5471	1.2488e-15	1.2687e-16	AVR78_RS18395	glycine--tRNA ligase subunit alpha
AVR78_RS18450	110.58	1276.98	-3.5296	2.0063e-91	1.865e-91	AVR78_RS18450	hypothetical protein
AVR78_RS18530	99.5222	910.474	-3.1935	1.8717e-51	6.5879e-52	AVR78_RS18530	hypothetical protein
AVR78_RS18535	154.812	374.78	-1.2755	0.034439	0.0019528	AVR78_RS18535	hypothetical protein
AVR78_RS18570	5.52901	297.424	-5.7494	5.4954e-45	1.5581e-45	AVR78_RS18570	protein-export protein SecB
AVR78_RS18575	27.645	144.369	-2.3847	0.0003993	2.5262e-05	AVR78_RS18575	glutaredoxin 3
AVR78_RS18580	22.116	233.306	-3.3991	1.1872e-16	1.2569e-17	AVR78_RS18580	rhodanese-like domain-containing protein
AVR78_RS18595	22.116	108.38	-2.2929	0.005433	0.00032493	AVR78_RS18595	divergent polysaccharide deacetylase family protein
AVR78_RS18605	127.167	835.601	-2.7161	4.9811e-29	8.2645e-30	AVR78_RS18605	L-threonine 3-dehydrogenase
AVR78_RS18610	77.4061	849.666	-3.4564	1.4193e-58	6.228e-59	AVR78_RS18610	glycine C-acetyltransferase
AVR78_RS18615	49.7611	730.531	-3.8759	1.8994e-64	9.917e-65	AVR78_RS18615	ADP-glyceromanno-heptose 6-epimerase
AVR78_RS18625	33.1741	128.649	-1.9553	0.075014	0.0041756	AVR78_RS18625	lipopolysaccharide heptosyltransferase RfaC
AVR78_RS18670	49.7611	359.06	-2.8511	1.4773e-15	1.4975e-16	AVR78_RS18670	3-deoxy-D-manno-octulosonic acid transferase
AVR78_RS18695	5.52901	2026.13	-8.5175	0	0	AVR78_RS18695	50S ribosomal protein L28
AVR78_RS18705	143.754	290.806	-1.0165	9.9645e-05	6.5063e-06	AVR78_RS18705	bifunctional phosphopantothenoylcysteine decarboxylase/phosphopantothenate--cysteine ligase CoaBC
AVR78_RS18725	160.341	378.916	-1.2407	0.015271	0.00088628	AVR78_RS18725	ribonuclease PH
AVR78_RS18755	77.4061	1034.57	-3.7404	2.534e-84	2.1061e-84	AVR78_RS18755	guanylate kinase
AVR78_RS18760	5.52901	275.087	-5.6367	3.8772e-41	9.6584e-42	AVR78_RS18760	DNA-directed RNA polymerase subunit omega
AVR78_RS18765	171.399	1267.47	-2.8865	7.3832e-53	2.7321e-53	AVR78_RS18765	bifunctional GTP diphosphokinase/guanosine-3'%2C5'-bis(diphosphate) 3'-diphosphatase
AVR78_RS18780	49.7611	107.966	-1.1175	0.060637	0.0033908	AVR78_RS18780	fructose-bisphosphatase class II
AVR78_RS18785	149.283	302.802	-1.0203	8.194e-05	5.37e-06	AVR78_RS18785	ferredoxin--NADP(+) reductase
AVR78_RS18800	176.928	1412.25	-2.9968	7.4362e-66	4.0489e-66	AVR78_RS18800	triose-phosphate isomerase
AVR78_RS18820	121.638	689.164	-2.5023	6.1395e-18	6.9114e-19	AVR78_RS18820	septal ring assembly protein ZapB
AVR78_RS18950	99.5222	210.555	-1.0811	0.0041534	0.00025025	AVR78_RS18950	LysR family transcriptional regulator
AVR78_RS18960	127.167	501.774	-1.9803	0.00020759	1.3346e-05	AVR78_RS18960	TetR/AcrR family transcriptional regulator
AVR78_RS19065	160.341	379.743	-1.2439	0.016338	0.00094613	AVR78_RS19065	LacI family transcriptional regulator
AVR78_RS19180	132.696	290.392	-1.1299	0.0028874	0.00017548	AVR78_RS19180	acetolactate synthase catalytic subunit
AVR78_RS19195	55.2901	253.576	-2.1973	0.00015802	1.023e-05	AVR78_RS19195	hypothetical protein
AVR78_RS19200	5.52901	98.8657	-4.1604	2.7978e-11	2.4048e-12	AVR78_RS19200	type I toxin-antitoxin system toxin TisB
AVR78_RS19205	0	28.5428	-5.8351	1.1712e-05	8.0036e-07	AVR78_RS19205	GNAT family N-acetyltransferase
AVR78_RS19215	110.58	699.919	-2.6621	6.3429e-23	8.5641e-24	AVR78_RS19215	multidrug transporter EmrD
AVR78_RS19275	33.1741	703.229	-4.4059	2.8282e-77	1.9961e-77	AVR78_RS19275	heat shock chaperone IbpB
AVR78_RS19280	82.9351	1015.13	-3.6135	5.8091e-77	4.0256e-77	AVR78_RS19280	heat-shock protein IbpA
AVR78_RS19310	304.096	2280.94	-2.907	8.1698e-96	8.2877e-96	AVR78_RS19310	DNA topoisomerase (ATP-hydrolyzing) subunit B
AVR78_RS19320	110.58	468.681	-2.0835	1.4358e-05	9.7817e-07	AVR78_RS19320	DNA polymerase III subunit beta
AVR78_RS19325	232.218	773.552	-1.736	0.030211	0.0017204	dnaA	chromosomal replication initiator protein DnaA
AVR78_RS19330	11.058	457.926	-5.3719	1.2788e-64	6.7159e-65	AVR78_RS19330	50S ribosomal protein L34
AVR78_RS19335	0	59.5676	-6.8965	5.0886e-11	4.3167e-12	AVR78_RS19335	ribonuclease P protein component
AVR78_RS19345	105.051	938.19	-3.1588	1.9386e-51	6.8055e-52	AVR78_RS19345	membrane protein insertase YidC
AVR78_RS19360	55.2901	119.963	-1.1175	0.047971	0.0027041	AVR78_RS19360	multidrug transporter MdtL
AVR78_RS19370	27.645	117.894	-2.0924	0.027277	0.0015587	AVR78_RS19370	hypothetical protein
AVR78_RS19435	270.921	1266.23	-2.2246	2.1164e-18	2.4161e-19	AVR78_RS19435	glutamine--fructose-6-phosphate transaminase (isomerizing)
AVR78_RS19440	121.638	1439.14	-3.5645	4.208e-105	4.8391e-105	AVR78_RS19440	bifunctional UDP-N-acetylglucosamine diphosphorylase/glucosamine-1-phosphate N-acetyltransferase GlmU
AVR78_RS19455	33.1741	651.521	-4.2957	5.5243e-69	3.204e-69	atpC	ATP synthase epsilon chain
AVR78_RS19460	121.638	1664.58	-3.7745	4.9779e-137	8.3005e-137	AVR78_RS19460	ATP synthase subunit beta
AVR78_RS19465	66.3481	886.068	-3.7393	1.9326e-72	1.2276e-72	AVR78_RS19465	ATP synthase subunit gamma
AVR78_RS19470	210.102	2654.48	-3.6593	1.1431e-203	3.0195e-203	AVR78_RS19470	ATP synthase subunit alpha
AVR78_RS19475	27.645	469.922	-4.0873	2.5422e-46	7.5193e-47	AVR78_RS19475	ATP synthase subunit delta
AVR78_RS19480	49.7611	1009.75	-4.3428	1.0211e-107	1.2671e-107	AVR78_RS19480	ATP synthase subunit B
AVR78_RS19485	5.52901	522.458	-6.5621	3.1372e-83	2.5211e-83	AVR78_RS19485	ATP synthase subunit C
AVR78_RS19490	38.7031	923.298	-4.5763	1.3661e-106	1.6271e-106	AVR78_RS19490	F0F1 ATP synthase subunit A
AVR78_RS19495	116.109	425.66	-1.8742	0.0080413	0.00047496	AVR78_RS19495	F0F1 ATP synthase subunit I
AVR78_RS19515	55.2901	215.519	-1.9627	0.019179	0.0011049	AVR78_RS19515	FMN-binding protein MioC
AVR78_RS19545	55.2901	2482.4	-5.4886	0	0	AVR78_RS19545	D-ribose pyranase
AVR78_RS19550	132.696	775.206	-2.5465	2.1329e-21	2.7215e-22	AVR78_RS19550	ribose ABC transporter ATP-binding protein RbsA
AVR78_RS19555	110.58	234.547	-1.0848	0.0027107	0.00016504	AVR78_RS19555	ribose ABC transporter permease
AVR78_RS19560	138.225	557.619	-2.0123	3.0696e-05	2.0618e-06	AVR78_RS19560	ribose ABC transporter substrate-binding protein RbsB
AVR78_RS19565	77.4061	333.827	-2.1086	0.00013781	8.9503e-06	AVR78_RS19565	ribokinase
AVR78_RS19580	38.7031	333.827	-3.1086	1.4032e-18	1.6158e-19	AVR78_RS19580	FadR family transcriptional regulator
AVR78_RS19625	55.2901	266.4	-2.2685	2.2729e-05	1.5367e-06	AVR78_RS19625	hypothetical protein
AVR78_RS19630	93.9932	609.741	-2.6976	4.017e-21	5.0672e-22	AVR78_RS19630	serine/threonine protein kinase
AVR78_RS19655	116.109	431.865	-1.8951	0.0047456	0.0002849	AVR78_RS19655	YihA family ribosome biogenesis GTP-binding protein
AVR78_RS19685	110.58	723.085	-2.7091	4.0676e-25	5.9107e-26	AVR78_RS19685	glutamate--ammonia ligase
AVR78_RS19700	226.689	1765.1	-2.961	6.1989e-79	4.4941e-79	AVR78_RS19700	translational GTPase TypA
AVR78_RS19730	66.3481	263.09	-1.9874	0.0064193	0.00038178	AVR78_RS19730	formate dehydrogenase accessory protein FdhE
AVR78_RS19745	254.334	842.633	-1.7282	0.029504	0.001682	AVR78_RS19745	formate dehydrogenase-N subunit alpha
AVR78_RS19750	49.7611	1489.19	-4.9034	9.0397e-187	2.1727e-186	AVR78_RS19750	sulfate ABC transporter substrate-binding protein
AVR78_RS19905	66.3481	1072.63	-4.015	3.8252e-100	4.0821e-100	AVR78_RS19905	superoxide dismutase [Mn]
AVR78_RS19915	116.109	398.772	-1.7801	0.05968	0.0033408	AVR78_RS19915	two-component system sensor histidine kinase CpxA
AVR78_RS19925	132.696	3926.91	-4.8872	0	0	cpxP	periplasmic repressor CpxP
AVR78_RS19935	193.515	1121.44	-2.5348	1.0865e-29	1.8475e-30	AVR78_RS19935	ATP-dependent 6-phosphofructokinase
AVR78_RS19940	199.044	1218.65	-2.6141	3.5434e-36	7.4205e-37	AVR78_RS19940	ribonuclease E activity regulator RraA
AVR78_RS19950	165.87	401.254	-1.2745	0.027971	0.0015966	AVR78_RS19950	ATP-dependent protease ATPase subunit HslU
AVR78_RS19955	5.52901	126.995	-4.5216	7.5015e-16	7.6857e-17	AVR78_RS19955	HslU--HslV peptidase proteolytic subunit
AVR78_RS19960	121.638	261.849	-1.1061	0.0026366	0.00016071	AVR78_RS19960	cell division protein FtsN
AVR78_RS19980	121.638	1440.38	-3.5658	2.8383e-105	3.2782e-105	AVR78_RS19980	50S ribosomal protein L31
AVR78_RS19985	93.9932	536.522	-2.513	1.5348e-14	1.5016e-15	AVR78_RS19985	met repressor
AVR78_RS20070	149.283	695.369	-2.2197	1.1654e-10	9.7375e-12	AVR78_RS20070	DNA-binding transcriptional regulator OxyR
AVR78_RS20075	243.276	1250.51	-2.3618	2.3641e-24	3.3372e-25	AVR78_RS20075	soluble pyridine nucleotide transhydrogenase
AVR78_RS20080	88.4641	441.379	-2.3189	7.6084e-09	5.9528e-10	AVR78_RS20080	HTH-type transcriptional repressor FabR
AVR78_RS20085	55.2901	229.583	-2.0539	0.0038884	0.00023487	AVR78_RS20085	membrane protein
AVR78_RS20090	127.167	272.605	-1.1001	0.0018399	0.00011282	AVR78_RS20090	tRNA (uridine(54)-C5)-methyltransferase TrmA
AVR78_RS20145	93.9932	392.981	-2.0638	0.00012158	7.9113e-06	AVR78_RS20145	DUF413 domain-containing protein
AVR78_RS20225	60.8191	676.341	-3.4752	1.4067e-47	4.3538e-48	AVR78_RS20225	ATP-dependent RNA helicase RhlB
AVR78_RS20230	132.696	2864.21	-4.4319	0	0	AVR78_RS20230	thioredoxin TrxA
AVR78_RS20240	138.225	1843.29	-3.7372	1.792e-148	3.2972e-148	AVR78_RS20240	transcription termination factor Rho
AVR78_RS20335	88.4641	441.379	-2.3189	7.6084e-09	5.9528e-10	AVR78_RS20335	protoheme IX biogenesis protein HemY
AVR78_RS20340	88.4641	538.59	-2.606	1.0673e-16	1.1322e-17	AVR78_RS20340	uroporphyrinogen-III C-methyltransferase
AVR78_RS20345	44.2321	276.741	-2.6454	9.1373e-10	7.3894e-11	AVR78_RS20345	uroporphyrinogen-III synthase
AVR78_RS20350	204.573	1015.96	-2.3122	3.2968e-18	3.7445e-19	AVR78_RS20350	hydroxymethylbilane synthase
AVR78_RS20360	293.037	1619.91	-2.4668	1.1663e-37	2.5463e-38	AVR78_RS20360	class I adenylate cyclase
AVR78_RS20375	71.8771	556.378	-2.9525	7.6812e-26	1.1468e-26	AVR78_RS20375	diaminopimelate epimerase
AVR78_RS20395	287.508	663.517	-1.2065	0.00031274	1.9914e-05	AVR78_RS20395	DNA helicase II
AVR78_RS20445	193.515	470.336	-1.2812	0.020623	0.0011858	AVR78_RS20445	lysophospholipase
AVR78_RS20470	176.928	369.816	-1.0636	7.5938e-05	4.9852e-06	AVR78_RS20470	dienelactone hydrolase
AVR78_RS20485	99.5222	349.132	-1.8107	0.048628	0.0027394	AVR78_RS20485	bifunctional demethylmenaquinone methyltransferase/2-methoxy-6-polyprenyl-1%2C4-benzoquinol methylase UbiE
AVR78_RS20490	27.645	122.031	-2.1422	0.015287	0.00088701	AVR78_RS20490	SCP2 domain-containing protein
AVR78_RS20495	304.096	777.688	-1.3547	0.036632	0.0020759	ubiB	ubiquinone biosynthesis regulatory protein kinase UbiB
AVR78_RS20500	16.587	104.657	-2.6575	0.00014527	9.4252e-06	AVR78_RS20500	Sec-independent protein translocase protein TatA
AVR78_RS20520	55.2901	227.515	-2.0409	0.0049846	0.00029885	AVR78_RS20520	transcription/translation regulatory transformer protein RfaH
AVR78_RS20530	138.225	483.987	-1.8079	0.021464	0.0012325	AVR78_RS20530	4-hydroxy-3-polyprenylbenzoate decarboxylase
AVR78_RS20535	127.167	869.108	-2.7728	2.5669e-32	4.7198e-33	AVR78_RS20535	NAD(P)H-flavin reductase
AVR78_RS20555	138.225	806.231	-2.5442	4.1009e-22	5.358e-23	AVR78_RS20555	Xaa-Pro dipeptidase
AVR78_RS20605	71.8771	312.73	-2.1213	0.00016771	1.0842e-05	AVR78_RS20605	UDP-N-acetylmuramate dehydrogenase
AVR78_RS20615	88.4641	204.35	-1.2079	0.046438	0.0026194	AVR78_RS20615	type I pantothenate kinase
AVR78_RS20625	0	16.5466	-5.0485	0.0017795	0.00010917	AVR78_RS20625	tRNA-Tyr
AVR78_RS20640	0	25.2335	-5.6573	4.6175e-05	3.069e-06	AVR78_RS20640	elongation factor Tu
AVR78_RS20645	0	15.7192	-4.9745	0.002528	0.00015424	AVR78_RS20645	hypothetical protein
AVR78_RS20650	55.2901	282.532	-2.3533	1.6158e-06	1.1444e-07	AVR78_RS20650	preprotein translocase subunit SecE
AVR78_RS20655	33.1741	413.25	-3.6389	7.4898e-33	1.4132e-33	nusG	transcription termination/antitermination protein NusG
AVR78_RS20660	33.1741	959.7	-4.8545	1.2945e-119	1.8274e-119	AVR78_RS20660	50S ribosomal protein L11
AVR78_RS20665	154.812	1624.46	-3.3914	2.1471e-105	2.4906e-105	AVR78_RS20665	50S ribosomal protein L1
AVR78_RS20675	66.3481	1834.19	-4.7889	5.7717e-223	1.6382e-222	AVR78_RS20675	50S ribosomal protein L10
AVR78_RS20680	44.2321	1072.63	-4.5999	2.0908e-124	3.1338e-124	AVR78_RS20680	50S ribosomal protein L7/L12
AVR78_RS20685	387.031	3395.77	-3.1332	2.6662e-177	6.1321e-177	AVR78_RS20685	DNA-directed RNA polymerase subunit beta
AVR78_RS20690	486.553	2854.69	-2.5527	5.0124e-75	3.3101e-75	AVR78_RS20690	DNA-directed RNA polymerase subunit beta'
AVR78_RS20705	0	78.5961	-7.2964	3.8841e-14	3.7424e-15	AVR78_RS20705	PTS sugar transporter subunit IIB
AVR78_RS20760	44.2321	732.185	-4.049	5.3081e-70	3.1471e-70	AVR78_RS20760	uroporphyrinogen decarboxylase
AVR78_RS20765	33.1741	213.864	-2.6886	2.8395e-08	2.1788e-09	AVR78_RS20765	deoxyribonuclease V
AVR78_RS20775	38.7031	1545.86	-5.3198	1.3322e-211	3.6641e-211	AVR78_RS20775	transcriptional regulator
AVR78_RS20810	88.4641	311.075	-1.8141	0.059671	0.0033408	AVR78_RS20810	bifunctional phosphoribosylaminoimidazolecarboxamide formyltransferase/IMP cyclohydrolase
AVR78_RS20850	171.399	1185.56	-2.7901	2.2051e-44	6.1219e-45	AVR78_RS20850	malate synthase A
AVR78_RS20855	232.218	501.361	-1.1104	3.8303e-05	2.5612e-06	AVR78_RS20855	isocitrate lyase
AVR78_RS20865	60.8191	529.904	-3.1231	6.5222e-29	1.0761e-29	AVR78_RS20865	acetate operon transcriptional repressor IclR
AVR78_RS20940	143.754	865.799	-2.5904	2.6075e-25	3.8328e-26	AVR78_RS20940	glucose-6-phosphate isomerase
AVR78_RS21040	66.3481	1293.53	-4.2851	1.4812e-134	2.4393e-134	AVR78_RS21040	LexA repressor
AVR78_RS21055	71.8771	833.946	-3.5364	1.3196e-60	6.0701e-61	AVR78_RS21055	hypothetical protein
AVR78_RS21060	105.051	710.261	-2.7573	3.2161e-26	4.878e-27	AVR78_RS21060	transcriptional regulator Zur
AVR78_RS21100	138.225	318.108	-1.2025	0.011475	0.00067093	AVR78_RS21100	aromatic amino acid transaminase
AVR78_RS21120	270.921	1034.99	-1.9337	1.5199e-06	1.0776e-07	AVR78_RS21120	excinuclease ABC subunit UvrA
AVR78_RS21125	88.4641	1488.36	-4.0725	8.7193e-142	1.5509e-141	AVR78_RS21125	single-stranded DNA-binding protein SSB1
AVR78_RS21215	38.7031	257.299	-2.7329	3.5067e-10	2.8822e-11	AVR78_RS21215	membrane protein
AVR78_RS21310	204.573	500.947	-1.292	0.022419	0.0012866	AVR78_RS21310	acetate--CoA ligase
AVR78_RS21350	33.1741	69.4955	-1.0669	0.088673	0.0049133	AVR78_RS21350	carbohydrate kinase family protein
AVR78_RS21395	0	11.5826	-4.5339	0.014706	0.00085366	AVR78_RS21395	phosphonate C-P lyase system protein PhnL
AVR78_RS21435	60.8191	347.478	-2.5143	5.9799e-10	4.873e-11	AVR78_RS21435	alkylphosphonate utilization operon protein PhnA
AVR78_RS21445	254.334	1056.5	-2.0545	5.6215e-10	4.5949e-11	AVR78_RS21445	proline/glycine betaine transporter ProP
AVR78_RS21465	71.8771	263.504	-1.8742	0.037053	0.0020984	AVR78_RS21465	stability/partitioning protein
AVR78_RS21550	60.8191	276.328	-2.1838	0.00010777	7.0234e-06	AVR78_RS21550	transcriptional regulator
AVR78_RS21565	66.3481	442.207	-2.7366	1.6379e-16	1.7204e-17	AVR78_RS21565	anaerobic C4-dicarboxylate transporter
AVR78_RS21570	165.87	5662.65	-5.0933	0	0	AVR78_RS21570	aspartate ammonia-lyase
AVR78_RS21595	33.1741	851.734	-4.6823	1.3501e-101	1.4763e-101	groES	molecular chaperone GroES
AVR78_RS21600	215.631	5184.04	-4.5874	0	0	AVR78_RS21600	molecular chaperone GroEL
AVR78_RS21660	132.696	746.663	-2.4923	5.2922e-19	6.19e-20	AVR78_RS21660	elongation factor P
AVR78_RS21670	0	99.693	-7.6394	1.798e-17	1.979e-18	AVR78_RS21670	entericidin B
AVR78_RS21690	5.52901	93.488	-4.0797	1.9832e-10	1.6442e-11	AVR78_RS21690	fumarate reductase subunit C
AVR78_RS21695	27.645	267.227	-3.273	2.9374e-17	3.204e-18	AVR78_RS21695	succinate dehydrogenase/fumarate reductase iron-sulfur subunit
AVR78_RS21700	176.928	1448.65	-3.0335	5.6648e-70	3.3437e-70	AVR78_RS21700	fumarate reductase (quinol) flavoprotein subunit
AVR78_RS21720	33.1741	222.551	-2.746	3.9602e-09	3.1259e-10	AVR78_RS21720	phosphatidylserine decarboxylase
AVR78_RS21745	0	38.8844	-6.2811	1.7289e-07	1.2856e-08	AVR78_RS21745	tRNA-Gly
AVR78_RS21750	0	10.3416	-4.3704	0.024955	0.001429	AVR78_RS21750	tRNA-Gly
AVR78_RS21785	165.87	1121.86	-2.7578	1.8121e-40	4.3911e-41	AVR78_RS21785	tRNA (adenosine(37)-N6)-dimethylallyltransferase MiaA
AVR78_RS21790	5.52901	694.128	-6.972	1.5114e-111	1.9386e-111	AVR78_RS21790	RNA-binding protein Hfq
AVR78_RS21795	187.986	935.708	-2.3154	5.2758e-17	5.6963e-18	AVR78_RS21795	GTPase HflX
AVR78_RS21800	182.457	1011.41	-2.4707	2.7e-24	3.8092e-25	AVR78_RS21800	FtsH protease activity modulator HflK
AVR78_RS21825	165.87	2775.27	-4.0645	9.4638e-262	3.1561e-261	AVR78_RS21825	adenylosuccinate synthetase
AVR78_RS21830	66.3481	387.603	-2.5465	1.8705e-11	1.6202e-12	AVR78_RS21830	transcriptional regulator
AVR78_RS21835	270.921	1490.02	-2.4594	2.4503e-34	4.8676e-35	AVR78_RS21835	ribonuclease R
AVR78_RS21850	38.7031	347.891	-3.1681	2.8418e-20	3.4923e-21	AVR78_RS21850	DUF1471 domain-containing protein
AVR78_RS21855	44.2321	354.924	-3.0043	6.4476e-18	7.2551e-19	AVR78_RS21855	biofilm peroxide resistance protein BsmA
AVR78_RS21910	33.1741	180.771	-2.446	2.6314e-05	1.7729e-06	AVR78_RS21910	DUF1471 domain-containing protein
AVR78_RS21915	105.051	958.459	-3.1896	6.7542e-54	2.5743e-54	AVR78_RS21915	30S ribosomal protein S6
AVR78_RS21920	11.058	106.725	-3.2707	9.5778e-08	7.2123e-09	AVR78_RS21920	primosomal replication protein N
AVR78_RS21925	0	14.4782	-4.8558	0.0042841	0.00025795	AVR78_RS21925	30S ribosomal protein S18
AVR78_RS21930	105.051	368.161	-1.8092	0.043927	0.0024793	AVR78_RS21930	50S ribosomal protein L9
AVR78_RS21970	88.4641	179.116	-1.0177	0.0023212	0.00014184	AVR78_RS21970	transcriptional regulator
AVR78_RS21985	66.3481	281.291	-2.0839	0.0007706	4.8137e-05	AVR78_RS21985	YtfJ family protein
AVR78_RS21990	116.109	954.736	-3.0396	5.3447e-47	1.6185e-47	AVR78_RS21990	DUF1107 domain-containing protein
AVR78_RS22040	110.58	713.157	-2.6891	3.6086e-24	5.0618e-25	AVR78_RS22040	inorganic diphosphatase
AVR78_RS22070	182.457	887.723	-2.2826	3.7434e-15	3.7405e-16	AVR78_RS22070	fructose 1%2C6-bisphosphatase
AVR78_RS22090	82.9351	337.55	-2.025	0.00089236	5.5574e-05	AVR78_RS22090	DUF615 domain-containing protein
AVR78_RS22095	149.283	570.029	-1.933	0.00036736	2.3275e-05	AVR78_RS22095	metalloprotease PmbA
AVR78_RS22100	66.3481	335.068	-2.3363	2.8991e-07	2.142e-08	AVR78_RS22100	cytochrome b562
AVR78_RS22160	0	67.4272	-7.0753	2.5418e-12	2.2794e-13	AVR78_RS22160	type II toxin-antitoxin system antitoxin%2C RelB/DinJ family
AVR78_RS22210	44.2321	1394.87	-4.9789	3.05e-178	7.1379e-178	AVR78_RS22210	2-iminobutanoate/2-iminopropanoate deaminase
AVR78_RS22240	138.225	1208.73	-3.1284	4.9097e-64	2.5239e-64	AVR78_RS22240	ribonuclease E inhibitor RraB
AVR78_RS22255	337.27	1186.8	-1.8151	0.0002226	1.4283e-05	AVR78_RS22255	valine--tRNA ligase
AVR78_RS22265	171.399	911.302	-2.4106	7.0335e-20	8.5064e-21	AVR78_RS22265	cytosol aminopeptidase
AVR78_RS22275	60.8191	508.393	-3.0633	2.2205e-26	3.3853e-27	AVR78_RS22275	LPS export ABC transporter permease LptF
AVR78_RS22315	55.2901	389.258	-2.8156	4.1758e-16	4.3215e-17	AVR78_RS22315	MurR/RpiR family transcriptional regulator
AVR78_RS22495	0	8.27328	-4.0485	0.060154	0.0033645	AVR78_RS22495	DUF2878 domain-containing protein
AVR78_RS22520	11.058	91.8334	-3.0539	6.9258e-06	4.78e-07	AVR78_RS22520	nuclear transport factor 2 family protein
AVR78_RS22635	0	11.1689	-4.4814	0.017541	0.0010132	AVR78_RS22635	QacE family quaternary ammonium compound efflux SMR transporter
AVR78_RS22805	265.392	558.86	-1.0744	2.0836e-06	1.4679e-07	AVR78_RS22805	NAD-dependent succinate-semialdehyde dehydrogenase
AVR78_RS22815	38.7031	167.948	-2.1175	0.0061149	0.00036432	AVR78_RS22815	hypothetical protein
AVR78_RS23035	281.979	687.923	-1.2867	0.006191	0.00036877	AVR78_RS23035	phosphatidylglycerol--membrane-oligosaccharide glycerophosphotransferase
AVR78_RS23050	27.645	202.282	-2.8713	1.3697e-09	1.0993e-10	AVR78_RS23050	primosomal protein DnaT
AVR78_RS23100	82.9351	166.707	-1.0073	0.0026713	0.00016268	AVR78_RS23100	hydroxamate siderophore iron reductase FhuF
AVR78_RS23140	11.058	107.553	-3.2819	7.4827e-08	5.657e-09	AVR78_RS23140	DNA polymerase III subunit psi
AVR78_RS23160	88.4641	397.531	-2.1679	5.5324e-06	3.8298e-07	AVR78_RS23160	molecular chaperone OsmY
AVR78_RS23165	33.1741	270.95	-3.0299	2.304e-14	2.2459e-15	AVR78_RS23165	membrane protein
AVR78_RS23185	160.341	393.808	-1.2963	0.046925	0.0026462	AVR78_RS23185	2-deoxyribose-5-phosphate aldolase
AVR78_RS23195	160.341	747.904	-2.2217	2.0858e-11	1.8027e-12	AVR78_RS23195	phosphopentomutase
AVR78_RS23200	77.4061	373.952	-2.2723	4.6048e-07	3.3613e-08	AVR78_RS23200	purine-nucleoside phosphorylase
AVR78_RS23230	160.341	584.921	-1.8671	0.0023237	0.00014197	AVR78_RS23230	multifunctional transcriptional regulator/nicotinamide-nucleotide adenylyltransferase/ribosylnicotinamide kinase NadR
AVR78_RS23235	171.399	1710.09	-3.3186	4.7424e-105	5.4303e-105	AVR78_RS23235	energy-dependent translational throttle protein EttA
AVR78_RS23245	226.689	468.681	-1.0479	3.9124e-06	2.7268e-07	AVR78_RS23245	murein transglycosylase
AVR78_RS23255	60.8191	130.304	-1.0993	0.03095	0.0017614	AVR78_RS23255	non-canonical purine NTP phosphatase
AVR78_RS23260	138.225	311.075	-1.1702	0.0058265	0.00034784	AVR78_RS23260	phosphoglycerate mutase GpmB
AVR78_RS23265	149.283	498.879	-1.7406	0.075237	0.0041871	AVR78_RS23265	MDR efflux pump AcrAB transcriptional activator RobA
AVR78_RS23290	110.58	2120.03	-4.2609	2.9673e-217	8.2464e-217	AVR78_RS23290	two-component system response regulator ArcA
AVR78_RS23335	165.87	344.996	-1.0565	0.00010266	6.6984e-06	AVR78_RS23335	sodium:alanine symporter family protein
AVR78_RS23340	93.9932	1443.27	-3.9406	1.5856e-129	2.4594e-129	AVR78_RS23340	transaldolase
AVR78_RS23345	38.7031	290.392	-2.9075	1.2641e-13	1.1917e-14	AVR78_RS23345	molybdopterin adenylyltransferase
AVR78_RS23370	342.799	6801.05	-4.3103	0	0	AVR78_RS23370	molecular chaperone DnaK
AVR78_RS23375	176.928	907.165	-2.3582	5.6403e-18	6.3628e-19	AVR78_RS23375	molecular chaperone DnaJ
AVR78_RS23380	149.283	3799.5	-4.6697	0	0	AVR78_RS23380	Na+/H+ antiporter NhaA
AVR78_RS23385	138.225	1534.69	-3.4729	1.77e-105	2.0621e-105	AVR78_RS23385	transcriptional activator NhaR
AVR78_RS23390	33.1741	572.925	-4.1102	1.262e-56	5.1722e-57	AVR78_RS23390	30S ribosomal protein S20
AVR78_RS23400	204.573	523.699	-1.3561	0.089016	0.0049313	AVR78_RS23400	bifunctional riboflavin kinase/FAD synthetase
AVR78_RS23405	270.921	1163.64	-2.1027	1.7547e-12	1.5832e-13	AVR78_RS23405	isoleucine--tRNA ligase
AVR78_RS23425	49.7611	283.773	-2.5116	2.378e-08	1.8305e-09	AVR78_RS23425	ribonucleoside hydrolase RihC
AVR78_RS23520	33.1741	193.181	-2.5418	2.323e-06	1.6319e-07	AVR78_RS23520	YgdI/YgdR family lipoprotein
AVR78_RS23525	5.52901	41.3664	-2.9034	0.0052683	0.00031522	AVR78_RS23525	glutathione-regulated potassium-efflux system oxidoreductase KefF
AVR78_RS23545	44.2321	165.466	-1.9034	0.0742	0.004132	AVR78_RS23545	bis(5'-nucleosyl)-tetraphosphatase (symmetrical)
AVR78_RS23550	5.52901	47.1577	-3.0924	0.0010328	6.4123e-05	AVR78_RS23550	Co2+/Mg2+ efflux protein ApaG
AVR78_RS23560	38.7031	192.354	-2.3132	0.00015077	9.768e-06	AVR78_RS23560	4-hydroxythreonine-4-phosphate dehydrogenase PdxA
AVR78_RS23565	110.58	746.663	-2.7554	2.0442e-27	3.2233e-28	AVR78_RS23565	peptidylprolyl isomerase SurA
AVR78_RS23570	215.631	1200.45	-2.4769	7.8629e-29	1.2933e-29	AVR78_RS23570	LPS assembly protein LptD
AVR78_RS23610	204.573	490.605	-1.2619	0.010702	0.00062724	AVR78_RS23610	RNA polymerase-associated protein RapA
AVR78_RS23680	160.341	700.333	-2.1269	1.3448e-08	1.0426e-09	AVR78_RS23680	MFS transporter
AVR78_RS23760	171.399	1040.36	-2.6017	1.4082e-30	2.4717e-31	AVR78_RS23760	catabolite repressor/activator
AVR78_RS23770	66.3481	306.939	-2.2098	2.3783e-05	1.6068e-06	AVR78_RS23770	division/cell wall cluster transcriptional repressor MraZ
AVR78_RS23775	38.7031	324.726	-3.0687	1.6639e-17	1.8352e-18	AVR78_RS23775	16S rRNA (cytosine(1402)-N(4))-methyltransferase
AVR78_RS23795	49.7611	207.246	-2.0583	0.0057129	0.00034136	AVR78_RS23795	UDP-N-acetylmuramoyl-tripeptide--D-alanyl-D-alanine ligase
AVR78_RS23840	149.283	941.913	-2.6575	4.2309e-30	7.306e-31	AVR78_RS23840	cell division protein FtsZ
AVR78_RS23845	154.812	6103.61	-5.3011	0	0	AVR78_RS23845	UDP-3-O-[3-hydroxymyristoyl] N-acetylglucosamine deacetylase
AVR78_RS23850	60.8191	256.058	-2.0739	0.001603	9.8722e-05	AVR78_RS23850	secA regulator SecM
AVR78_RS23855	414.676	923.712	-1.1555	7.1353e-07	5.1548e-08	AVR78_RS23855	preprotein translocase subunit SecA
AVR78_RS23870	27.645	139.405	-2.3342	0.00096299	5.9889e-05	AVR78_RS23870	cell division protein ZapD
AVR78_RS23940	99.5222	449.239	-2.1744	1.093e-06	7.8304e-08	AVR78_RS23940	pyruvate dehydrogenase complex transcriptional repressor PdhR
AVR78_RS23945	326.212	1649.69	-2.3383	3.7128e-30	6.4197e-31	AVR78_RS23945	pyruvate dehydrogenase (acetyl-transferring)%2C homodimeric type
AVR78_RS23950	187.986	831.051	-2.1443	2.141e-10	1.7729e-11	aceF	pyruvate dehydrogenase complex dihydrolipoyllysine-residue acetyltransferase
AVR78_RS23955	165.87	2381.88	-3.844	1.6112e-202	4.1735e-202	AVR78_RS23955	dihydrolipoyl dehydrogenase
AVR78_RS23980	309.625	3380.05	-3.4485	3.4556e-226	1.0131e-225	AVR78_RS23980	bifunctional aconitate hydratase 2/2-methylisocitrate dehydratase
AVR78_RS23985	127.167	440.138	-1.7912	0.038965	0.0022057	AVR78_RS23985	hypothetical protein
AVR78_RS23995	49.7611	232.065	-2.2214	0.00019122	1.2323e-05	AVR78_RS23995	polyamine aminopropyltransferase
AVR78_RS24010	116.109	283.36	-1.2872	0.079595	0.004425	AVR78_RS24010	chaperone lipoprotein YacC
AVR78_RS24030	93.9932	431.038	-2.1972	8.4309e-07	6.0645e-08	AVR78_RS24030	hypoxanthine phosphoribosyltransferase
AVR78_RS24040	55.2901	227.102	-2.0382	0.0052355	0.00031333	AVR78_RS24040	ABC transporter ATP-binding protein
AVR78_RS24045	11.058	100.52	-3.1843	5.927e-07	4.297e-08	AVR78_RS24045	ABC transporter permease
AVR78_RS24050	38.7031	207.659	-2.4237	1.0263e-05	7.0299e-07	AVR78_RS24050	PTS fructose subfamily IIA component
AVR78_RS24065	44.2321	256.058	-2.5333	6.6767e-08	5.0548e-09	AVR78_RS24065	pantoate--beta-alanine ligase
AVR78_RS24070	88.4641	206.832	-1.2253	0.058603	0.0032826	AVR78_RS24070	3-methyl-2-oxobutanoate hydroxymethyltransferase
AVR78_RS24080	105.051	449.239	-2.0964	1.4415e-05	9.8184e-07	AVR78_RS24080	polynucleotide adenylyltransferase
AVR78_RS24090	105.051	925.366	-3.1389	6.7131e-50	2.2416e-50	AVR78_RS24090	transcriptional regulator
AVR78_RS24095	66.3481	306.939	-2.2098	2.3783e-05	1.6068e-06	AVR78_RS24095	DNA/RNA nuclease SfsA
AVR78_RS24200	453.379	1051.12	-1.2131	8.9527e-06	6.156e-07	AVR78_RS24200	penicillin-binding protein 1B
AVR78_RS24235	49.7611	816.986	-4.0372	1.7235e-77	1.2229e-77	AVR78_RS24235	iron-sulfur cluster insertion protein ErpA
AVR78_RS24245	27.645	122.445	-2.147	0.014401	0.00083617	AVR78_RS24245	vitamin B12 ABC transporter substrate-binding protein BtuF
AVR78_RS24250	44.2321	522.044	-3.561	3.4317e-39	7.927e-40	AVR78_RS24250	5'-methylthioadenosine/adenosylhomocysteine nucleosidase
AVR78_RS24260	143.754	3160.81	-4.4586	0	0	AVR78_RS24260	serine endoprotease DegQ
AVR78_RS24270	27.645	428.142	-3.953	6.2214e-40	1.4767e-40	AVR78_RS24270	hypothetical protein
AVR78_RS24275	116.109	472.818	-2.0258	8.2202e-05	5.3859e-06	AVR78_RS24275	2%2C3%2C4%2C5-tetrahydropyridine-2%2C6-dicarboxylate N-succinyltransferase
AVR78_RS24280	154.812	323.485	-1.0632	0.00021174	1.3603e-05	AVR78_RS24280	bifunctional uridylyltransferase/uridylyl-removing protein GlnD
AVR78_RS24285	38.7031	495.156	-3.6774	6.8655e-40	1.6238e-40	AVR78_RS24285	type I methionyl aminopeptidase
AVR78_RS24290	149.283	3223.68	-4.4326	0	0	AVR78_RS24290	30S ribosomal protein S2
AVR78_RS24295	93.9932	1080.08	-3.5224	2.9249e-77	2.0543e-77	AVR78_RS24295	elongation factor Ts
AVR78_RS24305	44.2321	601.881	-3.7663	1.6355e-50	5.5727e-51	AVR78_RS24305	ribosome-recycling factor
AVR78_RS24320	27.645	236.616	-3.0975	1.7316e-13	1.6244e-14	AVR78_RS24320	(2E%2C6E)-farnesyl-diphosphate-specific ditrans%2Cpolycis-undecaprenyl-diphosphate synthase
AVR78_RS24330	320.683	731.772	-1.1902	6.7727e-05	4.4605e-06	AVR78_RS24330	sigma E protease regulator RseP
AVR78_RS24335	259.863	1441.21	-2.4715	5.8142e-34	1.144e-34	AVR78_RS24335	outer membrane protein assembly factor BamA
AVR78_RS24340	55.2901	642.006	-3.5375	4.2131e-47	1.2832e-47	AVR78_RS24340	molecular chaperone Skp
AVR78_RS24345	77.4061	525.353	-2.7628	6.1156e-20	7.4299e-21	lpxD	UDP-3-O-(3-hydroxymyristoyl)glucosamine N-acyltransferase
AVR78_RS24350	11.058	416.56	-5.2354	1.5802e-57	6.6706e-58	AVR78_RS24350	beta-hydroxyacyl-ACP dehydratase
AVR78_RS24355	116.109	662.276	-2.512	1.459e-17	1.6112e-18	AVR78_RS24355	acyl-[acyl-carrier-protein]--UDP-N-acetylglucosamine O-acyltransferase
AVR78_RS24365	44.2321	96.7974	-1.1299	0.085416	0.004738	AVR78_RS24365	ribonuclease HII
AVR78_RS24375	93.9932	342.927	-1.8673	0.019655	0.0011318	AVR78_RS24375	acetyl-CoA carboxylase carboxyltransferase subunit alpha
AVR78_RS24385	11.058	69.0819	-2.6432	0.002253	0.00013774	AVR78_RS24385	VOC family protein
AVR78_RS24395	27.645	129.063	-2.223	0.0053139	0.00031787	AVR78_RS24395	Rho-binding antiterminator
AVR78_RS24425	215.631	438.07	-1.0226	2.4187e-06	1.6981e-07	AVR78_RS24425	proline--tRNA ligase
AVR78_RS24430	11.058	74.4595	-2.7514	0.0006348	3.9859e-05	AVR78_RS24430	tRNA (N6-threonylcarbamoyladenosine(37)-N6)-methyltransferase TrmO
AVR78_RS24435	11.058	87.6968	-2.9874	2.1393e-05	1.4479e-06	AVR78_RS24435	Rcs stress response system protein RcsF
AVR78_RS24440	116.109	256.472	-1.1433	0.0069153	0.00041054	metQ	MetQ/NlpA family lipoprotein
AVR78_RS24455	44.2321	208.487	-2.2368	0.00031187	1.9863e-05	AVR78_RS24455	D-glycero-beta-D-manno-heptose 1%2C7-bisphosphate 7-phosphatase
AVR78_RS24505	55.2901	280.878	-2.3448	2.1403e-06	1.5075e-07	AVR78_RS24505	EEP domain-containing protein
AVR78_RS24515	121.638	2325.2	-4.2567	1.063e-237	3.2599e-237	AVR78_RS24515	murein transglycosylase D
AVR78_RS24530	33.1741	141.473	-2.0924	0.015596	0.00090454	AVR78_RS24530	ribonuclease H
AVR78_RS24545	182.457	390.499	-1.0978	0.00017705	1.1418e-05	AVR78_RS24545	LysR family transcriptional regulator
AVR78_RS24595	38.7031	182.839	-2.2401	0.00069894	4.3701e-05	AVR78_RS24595	NADH:ubiquinone reductase (Na(+)-transporting) subunit B
AVR78_RS24645	71.8771	421.937	-2.5534	1.8313e-12	1.6517e-13	AVR78_RS24645	xanthine phosphoribosyltransferase
AVR78_RS24650	127.167	946.463	-2.8958	2.5722e-40	6.1991e-41	frsA	esterase FrsA
AVR78_RS24655	60.8191	658.553	-3.4367	3.381e-45	9.6372e-46	AVR78_RS24655	Crl family RNA polymerase assembly factor
AVR78_RS24795	44.2321	179.53	-2.0211	0.016178	0.00093709	AVR78_RS24795	phospho-2-dehydro-3-deoxyheptonate aldolase
AVR78_RS25185	44.2321	182.426	-2.0441	0.01143	0.00066848	AVR78_RS25185	hypothetical protein
AVR78_RS25190	210.102	785.961	-1.9034	9.9518e-05	6.4996e-06	AVR78_RS25190	pyrroline-5-carboxylate reductase
AVR78_RS25200	49.7611	773.138	-3.9576	7.9384e-71	4.8025e-71	AVR78_RS25200	DUF2076 domain-containing protein
AVR78_RS25320	121.638	982.866	-3.0144	3.5308e-47	1.079e-47	AVR78_RS25320	peroxiredoxin
AVR78_RS25340	110.58	426.488	-1.9474	0.0014466	8.9342e-05	AVR78_RS25340	tRNA guanosine(34) transglycosylase Tgt
AVR78_RS25345	22.116	186.149	-3.0733	1.0396e-10	8.7113e-12	AVR78_RS25345	preprotein translocase subunit YajC
AVR78_RS25350	99.5222	568.374	-2.5138	2.4835e-15	2.496e-16	AVR78_RS25350	protein translocase subunit SecD
AVR78_RS25370	49.7611	505.084	-3.3434	7.275e-33	1.3736e-33	AVR78_RS25370	nucleoside-specific channel-forming protein Tsx
AVR78_RS25390	33.1741	289.151	-3.1237	1.6607e-16	1.7436e-17	AVR78_RS25390	6%2C7-dimethyl-8-ribityllumazine synthase
AVR78_RS25395	22.116	205.177	-3.2137	5.0242e-13	4.6269e-14	nusB	transcription antitermination factor NusB
AVR78_RS25400	22.116	196.49	-3.1513	5.9368e-12	5.2465e-13	AVR78_RS25400	thiamine-phosphate kinase
AVR78_RS25410	116.109	434.761	-1.9047	0.0036804	0.00022271	AVR78_RS25410	aldo/keto reductase
AVR78_RS25415	127.167	447.998	-1.8168	0.02257	0.0012944	AVR78_RS25415	1-deoxy-D-xylulose-5-phosphate synthase
AVR78_RS25420	27.645	182.839	-2.7255	1.4162e-07	1.0583e-08	AVR78_RS25420	(2E%2C6E)-farnesyl diphosphate synthase
AVR78_RS25425	0	95.97	-7.5845	6.8373e-17	7.3466e-18	AVR78_RS25425	exodeoxyribonuclease 7 small subunit
AVR78_RS25450	154.812	779.757	-2.3325	6.4786e-15	6.4089e-16	AVR78_RS25450	YajQ family cyclic di-GMP-binding protein
AVR78_RS25505	127.167	1418.45	-3.4795	4.5343e-98	4.7627e-98	AVR78_RS25505	protoheme IX farnesyltransferase
AVR78_RS25510	16.587	141.887	-3.0966	1.1754e-08	9.1186e-10	AVR78_RS25510	cytochrome o ubiquinol oxidase subunit IV
AVR78_RS25515	16.587	579.957	-5.1278	1.0486e-77	7.4805e-78	AVR78_RS25515	cytochrome o ubiquinol oxidase subunit III
AVR78_RS25520	243.276	3530.21	-3.8591	1.5103e-301	6.4989e-301	AVR78_RS25520	cytochrome o ubiquinol oxidase subunit I
AVR78_RS25525	82.9351	2846.01	-5.1008	0	0	AVR78_RS25525	cytochrome o ubiquinol oxidase subunit II
AVR78_RS25535	27.645	319.762	-3.5319	3.1932e-24	4.4886e-25	AVR78_RS25535	hypothetical protein
AVR78_RS25540	93.9932	818.227	-3.1219	1.1341e-43	3.0812e-44	AVR78_RS25540	BolA family transcriptional regulator
AVR78_RS25550	259.863	2460.06	-3.2429	1.4181e-141	2.489e-141	AVR78_RS25550	trigger factor
AVR78_RS25555	138.225	1612.88	-3.5445	4.4108e-116	5.8839e-116	AVR78_RS25555	ATP-dependent Clp endopeptidase%2C proteolytic subunit ClpP
AVR78_RS25560	176.928	1812.26	-3.3566	2.0215e-114	2.6568e-114	AVR78_RS25560	ATP-dependent Clp protease ATP-binding subunit ClpX
AVR78_RS25565	442.321	3125.23	-2.8208	2.3118e-118	3.1793e-118	AVR78_RS25565	endopeptidase La
AVR78_RS25570	38.7031	1013.48	-4.7107	1.726e-121	2.5163e-121	AVR78_RS25570	DNA-binding protein HU-beta
AVR78_RS25575	182.457	879.036	-2.2684	1.415e-14	1.3874e-15	AVR78_RS25575	peptidylprolyl isomerase
AVR78_RS25580	0	16.5466	-5.0485	0.0017795	0.00010917	AVR78_RS25580	hypothetical protein
AVR78_RS25590	77.4061	159.261	-1.0409	0.0062842	0.00037399	AVR78_RS25590	7-cyano-7-deazaguanine synthase QueC
AVR78_RS25640	77.4061	480.677	-2.6345	1.1722e-15	1.1919e-16	AVR78_RS25640	glycoprotein/polysaccharide metabolism
AVR78_RS25745	0	22.7515	-5.5079	0.00013013	8.4576e-06	AVR78_RS25745	type B 50S ribosomal protein L31
AVR78_RS25765	71.8771	3667.96	-5.6733	0	0	AVR78_RS25765	sigma factor YlaC
AVR78_RS25775	55.2901	1243.06	-4.4907	5.0677e-139	8.5033e-139	AVR78_RS25775	maltose O-acetyltransferase
AVR78_RS25780	5.52901	636.629	-6.8473	3.7892e-102	4.1948e-102	AVR78_RS25780	transcriptional regulator
AVR78_RS25785	38.7031	1768.83	-5.5142	8.1598e-250	2.6229e-249	AVR78_RS25785	Hha toxicity attenuator
AVR78_RS25790	315.154	1975.66	-2.6482	1.8682e-60	8.5642e-61	AVR78_RS25790	multidrug efflux RND transporter permease subunit
AVR78_RS25795	154.812	1096.21	-2.8239	7.7649e-43	2.0491e-43	AVR78_RS25795	MexE family multidrug efflux RND transporter periplasmic adaptor subunit
AVR78_RS25800	49.7611	235.788	-2.2444	0.00010859	7.0746e-06	AVR78_RS25800	DNA-binding transcriptional repressor AcrR
AVR78_RS25830	33.1741	189.872	-2.5169	4.513e-06	3.1363e-07	AVR78_RS25830	adenine phosphoribosyltransferase
AVR78_RS25835	110.58	522.871	-2.2414	9.329e-09	7.267e-10	AVR78_RS25835	DNA polymerase III subunit gamma/tau
AVR78_RS25840	49.7611	100.934	-1.0203	0.022977	0.0013172	AVR78_RS25840	YbaB/EbfC family nucleoid-associated protein
AVR78_RS25845	38.7031	175.394	-2.1801	0.002145	0.00013128	AVR78_RS25845	recombination protein RecR
AVR78_RS25850	281.979	1177.29	-2.0618	3.3668e-11	2.8836e-12	AVR78_RS25850	molecular chaperone HtpG
AVR78_RS25855	121.638	465.786	-1.9371	0.0011499	7.1215e-05	AVR78_RS25855	adenylate kinase
AVR78_RS25870	259.863	522.044	-1.0064	1.0127e-07	7.6153e-09	AVR78_RS25870	Kef family K(+) transporter
AVR78_RS25905	193.515	3812.33	-4.3002	0	0	copA	copper-exporting P-type ATPase CopA
AVR78_RS25910	71.8771	157.606	-1.1327	0.029373	0.0016749	AVR78_RS25910	HTH-type transcriptional regulator CueR
AVR78_RS25915	44.2321	170.43	-1.946	0.044747	0.002525	AVR78_RS25915	NfeD family protein
AVR78_RS25920	66.3481	586.162	-3.1432	2.3475e-32	4.3343e-33	AVR78_RS25920	SPFH/Band 7/PHB domain protein
AVR78_RS25935	22.116	432.692	-4.2902	2.5132e-46	7.4502e-47	AVR78_RS25935	co-chaperone YbbN
AVR78_RS25980	22.116	134.027	-2.5994	3.8282e-05	2.5604e-06	AVR78_RS25980	5-(carboxyamino)imidazole ribonucleotide mutase
AVR78_RS26000	27.645	452.548	-4.033	1.2012e-43	3.2601e-44	AVR78_RS26000	peptidyl-prolyl cis-trans isomerase
AVR78_RS26005	171.399	883.173	-2.3653	8.8626e-18	9.8905e-19	AVR78_RS26005	cysteine--tRNA ligase
AVR78_RS26015	116.109	486.882	-2.0681	1.6409e-05	1.1162e-06	AVR78_RS26015	bifunctional methylenetetrahydrofolate dehydrogenase/methenyltetrahydrofolate cyclohydrolase
AVR78_RS26035	132.696	317.28	-1.2576	0.036947	0.0020933	AVR78_RS26035	hypothetical protein
AVR78_RS26140	320.683	735.081	-1.1968	9.101e-05	5.9512e-06	AVR78_RS26140	hypothetical protein
AVR78_RS26165	93.9932	1371.71	-3.8673	7.4709e-119	1.0381e-118	AVR78_RS26165	DUF4065 domain-containing protein
AVR78_RS26170	55.2901	322.244	-2.5431	1.0189e-09	8.2178e-11	AVR78_RS26170	hypothetical protein
AVR78_RS26205	82.9351	194.008	-1.2261	0.067729	0.0037811	AVR78_RS26205	GNAT family N-acetyltransferase
AVR78_RS26215	33.1741	1226.1	-5.2079	9.2891e-165	1.9669e-164	AVR78_RS26215	DUF1471 domain-containing protein
AVR78_RS26310	33.1741	268.054	-3.0144	4.9592e-14	4.7524e-15	AVR78_RS26310	sucrose operon repressor
AVR78_RS26315	66.3481	633.733	-3.2557	3.4009e-38	7.5676e-39	AVR78_RS26315	sucrose-6-phosphate hydrolase
AVR78_RS26320	110.58	969.628	-3.1323	6.6705e-52	2.3856e-52	AVR78_RS26320	PTS sucrose transporter subunit IIBC
AVR78_RS26325	187.986	2163.88	-3.5249	3.9479e-153	7.7448e-153	AVR78_RS26325	sucrose porin
AVR78_RS26330	127.167	476.541	-1.9059	0.0022927	0.00014013	AVR78_RS26330	aminoimidazole riboside kinase
AVR78_RS26380	171.399	3562.47	-4.3774	0	0	AVR78_RS26380	hypothetical protein
AVR78_RS26405	176.928	385.948	-1.1252	0.000507	3.1918e-05	AVR78_RS26405	aldo/keto reductase
AVR78_RS26575	71.8771	344.996	-2.263	1.6748e-06	1.1852e-07	AVR78_RS26575	mechanosensitive ion channel family protein
AVR78_RS26630	16.587	283.773	-4.0966	9.3183e-29	1.5224e-29	AVR78_RS26630	oxygen-insensitive NAD(P)H nitroreductase
AVR78_RS26635	16.587	111.276	-2.746	3.157e-05	2.1184e-06	AVR78_RS26635	hypothetical protein
AVR78_RS26640	66.3481	1499.53	-4.4983	1.0424e-167	2.2796e-167	AVR78_RS26640	TetR/AcrR family transcriptional regulator
AVR78_RS26645	127.167	2331.82	-4.1967	8.1437e-233	2.4412e-232	AVR78_RS26645	outer membrane protein romA
AVR78_RS26650	71.8771	736.322	-3.3567	1.398e-47	4.3318e-48	AVR78_RS26650	RamA family antibiotic efflux transcriptional regulator
AVR78_RS26655	38.7031	332.999	-3.105	1.7599e-18	2.0117e-19	AVR78_RS26655	DUF1158 domain-containing protein
AVR78_RS26665	254.334	586.162	-1.2046	0.00065173	4.0874e-05	AVR78_RS26665	Mg2+ transport ATPase P-type 1
AVR78_RS26810	77.4061	322.244	-2.0576	0.00057583	3.619e-05	AVR78_RS26810	PhzF family phenazine biosynthesis protein
AVR78_RS26845	127.167	882.759	-2.7953	1.0914e-33	2.1331e-34	AVR78_RS26845	C-lysozyme inhibitor
AVR78_RS27005	5.52901	31.8521	-2.5263	0.058322	0.0032696	AVR78_RS27005	DUF466 domain-containing protein
AVR78_RS27015	0	35.5751	-6.1528	6.5857e-07	4.7655e-08	AVR78_RS27015	type II toxin-antitoxin system RelE/ParE family toxin
AVR78_RS27100	11.058	222.965	-4.3337	4.5665e-25	6.6214e-26	AVR78_RS27100	hypothetical protein
AVR78_RS27105	44.2321	416.146	-3.2339	3.1582e-25	4.6194e-26	AVR78_RS27105	cupin domain-containing protein
AVR78_RS27110	0	232.479	-8.861	1.7454e-36	3.6898e-37	AVR78_RS27110	DUF86 domain-containing protein
AVR78_RS27115	22.116	278.809	-3.6561	6.4285e-23	8.6752e-24	AVR78_RS27115	nucleotidyltransferase
AVR78_RS27140	0	9.10061	-4.186	0.042325	0.0023912	AVR78_RS27140	universal stress protein
AVR78_RS27200	0	9.92793	-4.3115	0.029763	0.0016953	AVR78_RS27200	hypothetical protein
AVR78_RS27385	0	7.44595	-3.8965	0.085421	0.004738	AVR78_RS27385	plasmid stabilization protein
AVR78_RS27405	5.52901	83.1465	-3.9106	8.0149e-09	6.2689e-10	AVR78_RS27405	chromosome partitioning protein ParB
AVR78_RS27410	11.058	299.079	-4.7574	1.3555e-37	2.9546e-38	AVR78_RS27410	chromosome partitioning protein ParA
AVR78_RS27415	44.2321	287.083	-2.6983	9.4867e-11	7.9566e-12	AVR78_RS27415	replication initiation protein
AVR78_RS27650	0	28.9565	-5.8558	9.8738e-06	6.7729e-07	AVR78_RS27650	phage integrase family protein
AVR78_RS27665	27.645	165.466	-2.5814	6.4195e-06	4.4336e-07	AVR78_RS27665	hypothetical protein
AVR78_RS27705	0	7.44595	-3.8965	0.085421	0.004738	AVR78_RS27705	AbrB/MazE/SpoVT family DNA-binding domain-containing protein
AVR78_RS27710	0	13.2372	-4.7265	0.0072658	0.00043048	AVR78_RS27710	PIN domain nuclease
AVR78_RS27930	0	27.7155	-5.7926	1.6486e-05	1.1212e-06	AVR78_RS27930	hypothetical protein
AVR78_RS27935	0	7.85961	-3.9745	0.071692	0.0039948	AVR78_RS27935	hypothetical protein
AVR78_RS27965	11.058	168.775	-3.9319	1.4394e-16	1.5167e-17	AVR78_RS27965	VGR-related protein
AVR78_RS28010	298.566	972.524	-1.7037	0.040348	0.0022826	AVR78_RS28010	class A extended-spectrum beta-lactamase SHV-18
AVR78_RS28025	409.147	906.338	-1.1474	5.1257e-07	3.7374e-08	AVR78_RS28025	DNA resolvase
AVR78_RS28045	99.5222	398.358	-2.001	0.00056826	3.574e-05	AVR78_RS28045	hypothetical protein
AVR78_RS28060	82.9351	1403.15	-4.0805	3.0074e-134	4.9225e-134	AVR78_RS28060	antitoxin
AVR78_RS28065	93.9932	2407.94	-4.6791	2.4547e-283	9.2239e-283	AVR78_RS28065	mRNA interferase PemK
AVR78_RS28070	33.1741	369.402	-3.4771	8.6579e-27	1.3414e-27	AVR78_RS28070	peptidase
AVR78_RS28155	409.147	1799.02	-2.1365	2.4821e-20	3.0545e-21	AVR78_RS28155	chromosome partitioning protein ParA
AVR78_RS28185	22.116	160.915	-2.8631	7.5024e-08	5.6703e-09	AVR78_RS28185	hypothetical protein
AVR78_RS28195	110.58	819.882	-2.8903	6.0277e-35	1.2128e-35	AVR78_RS28195	hypothetical protein
AVR78_RS28205	93.9932	192.767	-1.0362	0.0023896	0.00014596	AVR78_RS28205	hypothetical protein
AVR78_RS28215	88.4641	656.485	-2.8916	2.3618e-28	3.812e-29	AVR78_RS28215	hypothetical protein
AVR78_RS28230	105.051	683.786	-2.7025	1.2186e-23	1.6794e-24	AVR78_RS28230	DUF1380 domain-containing protein
AVR78_RS28240	44.2321	352.855	-2.9959	1.1064e-17	1.2284e-18	AVR78_RS28240	antirestriction protein
AVR78_RS28250	105.051	772.311	-2.8781	1.3876e-32	2.587e-33	AVR78_RS28250	hypothetical protein
AVR78_RS28255	221.16	858.353	-1.9565	4e-06	2.7871e-07	AVR78_RS28255	single-stranded DNA-binding protein
AVR78_RS28265	381.502	1955.8	-2.358	7.0728e-37	1.5072e-37	AVR78_RS28265	hypothetical protein
AVR78_RS28270	331.741	783.479	-1.2398	0.00046549	2.9367e-05	AVR78_RS28270	hypothetical protein
AVR78_RS28275	193.515	640.352	-1.7264	0.06002	0.0033591	AVR78_RS28275	hypothetical protein
AVR78_RS28280	685.597	3921.12	-2.5158	1.9128e-96	1.9553e-96	AVR78_RS28280	hypothetical protein
AVR78_RS28320	11.058	59.9813	-2.4394	0.016116	0.00093371	AVR78_RS28320	hypothetical protein
AVR78_RS28390	99.5222	912.129	-3.1961	1.1747e-51	4.1788e-52	AVR78_RS28390	hypothetical protein
AVR78_RS28395	265.392	635.388	-1.2595	0.0033698	0.00020428	AVR78_RS28395	hypothetical protein
AVR78_RS28400	392.56	818.227	-1.0596	2.8273e-09	2.2483e-10	AVR78_RS28400	RepA protein%2C IncFII family
AVR78_RS28425	718.771	15931	-4.4702	0	0	AVR78_RS28425	aminoglycoside nucleotidyltransferase ANT(2'')-Ia
AVR78_RS28430	381.502	5425.62	-3.83	0	0	AVR78_RS28430	APH(3') family aminoglycoside O-phosphotransferase AphA16
AVR78_RS28435	138.225	1359.3	-3.2978	1.4648e-82	1.1597e-82	AVR78_RS28435	ANT(3'') family aminoglycoside nucleotidyltransferase
AVR78_RS28525	5.52901	143.541	-4.6983	1.3131e-18	1.5146e-19	AVR78_RS28525	hypothetical protein
AVR78_RS28565	0	8.27328	-4.0485	0.060154	0.0033645	AVR78_RS28565	hypothetical protein
AVR78_RS28570	127.167	290.806	-1.1933	0.012866	0.00075028	AVR78_RS28570	DNA topoisomerase III
AVR78_RS28590	11.058	104.243	-3.2368	1.998e-07	1.4832e-08	AVR78_RS28590	DUF333 domain-containing protein
AVR78_RS28770	0	23.9925	-5.5845	7.7457e-05	5.0812e-06	AVR78_RS28770	hypothetical protein

## Sheet: KEGG_down
Term	Sample number	Background number	P-value	Corrected P-value	UniGenes	KO	Entrez ID
Ribosome	46	72	0.000124368	0.0115662	AVR78_RS16030 AVR78_RS08610 AVR78_RS17215 AVR78_RS16655 AVR78_RS17210 AVR78_RS17220 AVR78_RS21915 AVR78_RS16855 AVR78_RS08605 AVR78_RS21930 AVR78_RS17290 AVR78_RS20680 AVR78_RS24290 AVR78_RS13030 AVR78_RS23390 AVR78_RS25745 AVR78_RS18695 AVR78_RS17265 AVR78_RS17320 AVR78_RS17190 AVR78_RS17260 AVR78_RS17175 AVR78_RS16530 AVR78_RS17170 AVR78_RS17205 AVR78_RS11065 AVR78_RS17325 AVR78_RS17155 AVR78_R…	kpr:KPR_4507 kpr:KPR_2726 kpr:KPR_0766 kpr:KPR_4788 kpr:KPR_0767 kpr:KPR_0765 kpr:KPR_0570 kpr:KPR_4821 kpr:KPR_2725 kpr:KPR_0573 kpr:KPR_0751 kpr:KPR_0299 kpr:KPR_1113 kpr:KPR_1344 kpr:KPR_0952 kpr:KPR_4187 kpr:KPR_4936 kpr:KPR_0756 kpr:KPR_0746 kpr:KPR_0771 kpr:KPR_0757 kpr:KPR_0773 kpr:KPR_4768 kpr:KPR_0774 kpr:KPR_0768 kpr:KPR_1472 kpr:KPR_0745 kpr:KPR_0777 kpr:KPR_0769 kpr:KPR_0764 kpr:KPR_3…	NA
Oxidative phosphorylation	33	47	0.000329098	0.0126231	AVR78_RS12530 AVR78_RS07270 AVR78_RS19490 AVR78_RS11385 AVR78_RS25510 AVR78_RS11400 AVR78_RS11405 AVR78_RS25515 AVR78_RS00610 AVR78_RS00615 AVR78_RS00655 AVR78_RS00650 AVR78_RS21700 AVR78_RS22040 AVR78_RS19460 AVR78_RS19465 AVR78_RS11395 AVR78_RS19480 AVR78_RS19485 AVR78_RS11390 AVR78_RS07265 AVR78_RS11350 AVR78_RS11410 AVR78_RS00620 AVR78_RS25520 AVR78_RS25525 AVR78_RS00625 AVR78_RS19470 AVR78_R…	kpr:KPR_1877 kpr:KPR_2962 kpr:KPR_0102 kpr:KPR_2033 kpr:KPR_4329 kpr:KPR_2030 kpr:KPR_2029 kpr:KPR_4328 kpr:KPR_3850 kpr:KPR_3849 kpr:KPR_3841 kpr:KPR_3842 kpr:KPR_0532 kpr:KPR_0595 kpr:KPR_0096 kpr:KPR_0097 kpr:KPR_2031 kpr:KPR_0100 kpr:KPR_0101 kpr:KPR_2032 kpr:KPR_2961 kpr:KPR_2040 kpr:KPR_2028 kpr:KPR_3848 kpr:KPR_4327 kpr:KPR_4326 kpr:KPR_3847 kpr:KPR_0098 kpr:KPR_4330 kpr:KPR_0095 kpr:KPR_0…	NA
Carbon metabolism	66	126	0.000407197	0.0126231	AVR78_RS18780 AVR78_RS23950 AVR78_RS09040 AVR78_RS14335 AVR78_RS23955 AVR78_RS08950 AVR78_RS00620 AVR78_RS11565 AVR78_RS17485 AVR78_RS12740 AVR78_RS00630 AVR78_RS14250 AVR78_RS00635 AVR78_RS00845 AVR78_RS23260 AVR78_RS00610 AVR78_RS11460 AVR78_RS10670 AVR78_RS11465 AVR78_RS00615 AVR78_RS19935 AVR78_RS12355 AVR78_RS09595 AVR78_RS09355 AVR78_RS16995 AVR78_RS21700 AVR78_RS15420 AVR78_RS16365 AVR78_R…	kpr:KPR_0356 kpr:KPR_1048 kpr:KPR_3194 kpr:KPR_4149 kpr:KPR_1049 kpr:KPR_3159 kpr:KPR_3848 kpr:KPR_2000 kpr:KPR_0713 kpr:KPR_1397 kpr:KPR_3846 kpr:KPR_4132 kpr:KPR_3845 kpr:KPR_3814 kpr:KPR_0928 kpr:KPR_3850 kpr:KPR_2019 kpr:KPR_1550 kpr:KPR_2018 kpr:KPR_3849 kpr:KPR_0182 kpr:KPR_1908 kpr:KPR_3282 kpr:KPR_3242 kpr:KPR_4850 kpr:KPR_0532 kpr:KPR_4619 kpr:KPR_5002 kpr:KPR_4239 kpr:KPR_2678 kpr:KPR_1…	NA
RNA degradation	14	16	0.00469963	0.0910476	AVR78_RS21600 AVR78_RS19935 AVR78_RS21790 AVR78_RS16520 AVR78_RS20225 AVR78_RS16510 AVR78_RS23370 AVR78_RS24080 AVR78_RS20240 AVR78_RS21835 AVR78_RS14785 AVR78_RS14250 AVR78_RS01135 AVR78_RS12530	kpr:KPR_0511 kpr:KPR_0182 kpr:KPR_0546 kpr:KPR_4767 kpr:KPR_0235 kpr:KPR_4765 kpr:KPR_0948 kpr:KPR_1073 kpr:KPR_0237 kpr:KPR_0554 kpr:KPR_1794 kpr:KPR_4132 kpr:KPR_3758 kpr:KPR_1877	NA
Citrate cycle (TCA cycle)	22	33	0.00489503	0.0910476	AVR78_RS23950 AVR78_RS09040 AVR78_RS23955 AVR78_RS05160 AVR78_RS00630 AVR78_RS00635 AVR78_RS00610 AVR78_RS00615 AVR78_RS21700 AVR78_RS23980 AVR78_RS17575 AVR78_RS05155 AVR78_RS23945 AVR78_RS03155 AVR78_RS00595 AVR78_RS00625 AVR78_RS00620 AVR78_RS16885 AVR78_RS00645 AVR78_RS00640 AVR78_RS21695 AVR78_RS21690	kpr:KPR_1048 kpr:KPR_3194 kpr:KPR_1049 kpr:KPR_2826 kpr:KPR_3846 kpr:KPR_3845 kpr:KPR_3850 kpr:KPR_3849 kpr:KPR_0532 kpr:KPR_1053 kpr:KPR_3194 kpr:KPR_2827 kpr:KPR_1047 kpr:KPR_2189 kpr:KPR_3851 kpr:KPR_3847 kpr:KPR_3848 kpr:KPR_4827 kpr:KPR_3843 kpr:KPR_3844 kpr:KPR_0531 kpr:KPR_0530	NA
Protein export	13	16	0.00960699	0.148908	AVR78_RS20500 AVR78_RS12840 AVR78_RS25345 AVR78_RS17860 AVR78_RS25350 AVR78_RS19345 AVR78_RS13050 AVR78_RS18570 AVR78_RS17185 AVR78_RS00205 AVR78_RS23855 AVR78_RS16595 AVR78_RS23850	kpr:KPR_3916 kpr:KPR_1380 kpr:KPR_4363 kpr:KPR_5087 kpr:KPR_4362 kpr:KPR_5145 kpr:KPR_1340 kpr:KPR_4961 kpr:KPR_0772 kpr:KPR_3916 kpr:KPR_1030 kpr:KPR_4778 kpr:KPR_1029	NA
Biosynthesis of antibiotics	91	222	0.0131992	0.175361	AVR78_RS08730 AVR78_RS09040 AVR78_RS00630 AVR78_RS11545 AVR78_RS10495 AVR78_RS00635 AVR78_RS12605 AVR78_RS09595 AVR78_RS19935 AVR78_RS09355 AVR78_RS08355 AVR78_RS23980 AVR78_RS17575 AVR78_RS11630 AVR78_RS16885 AVR78_RS19435 AVR78_RS00645 AVR78_RS00640 AVR78_RS15415 AVR78_RS08635 AVR78_RS12780 AVR78_RS12620 AVR78_RS12435 AVR78_RS15330 AVR78_RS14250 AVR78_RS00845 AVR78_RS05155 AVR78_RS25420 AVR78_R…	kpr:KPR_3118 kpr:KPR_3194 kpr:KPR_3846 kpr:KPR_2004 kpr:KPR_1582 kpr:KPR_3845 kpr:KPR_1431 kpr:KPR_3282 kpr:KPR_0182 kpr:KPR_3242 kpr:KPR_2678 kpr:KPR_1053 kpr:KPR_3194 kpr:KPR_1987 kpr:KPR_4827 kpr:KPR_0093 kpr:KPR_3843 kpr:KPR_3844 kpr:KPR_4618 kpr:KPR_3102 kpr:KPR_1391 kpr:KPR_1428 kpr:KPR_1892 kpr:KPR_4604 kpr:KPR_4132 kpr:KPR_3814 kpr:KPR_2827 kpr:KPR_4348 kpr:KPR_2710 kpr:KPR_4619 kpr:KPR_4…	NA
Fatty acid biosynthesis	11	14	0.0195984	0.227831	AVR78_RS04290 AVR78_RS11600 AVR78_RS24375 AVR78_RS16995 AVR78_RS09315 AVR78_RS17000 AVR78_RS24350 AVR78_RS02865 AVR78_RS02875 AVR78_RS02025 AVR78_RS11565	kpr:KPR_2335 kpr:KPR_1993 kpr:KPR_1129 kpr:KPR_4850 kpr:KPR_3234 kpr:KPR_4851 kpr:KPR_1124 kpr:KPR_2598 kpr:KPR_4526 kpr:KPR_1666 kpr:KPR_2000	NA
Methane metabolism	18	32	0.0327377	0.33829	AVR78_RS19935 AVR78_RS00775 AVR78_RS11460 AVR78_RS12740 AVR78_RS18780 AVR78_RS08510 AVR78_RS15415 AVR78_RS16885 AVR78_RS10900 AVR78_RS22070 AVR78_RS14250 AVR78_RS21310 AVR78_RS10670 AVR78_RS23260 AVR78_RS19745 AVR78_RS19750 AVR78_RS11465 AVR78_RS08635	kpr:KPR_0182 kpr:KPR_3826 kpr:KPR_2019 kpr:KPR_1397 kpr:KPR_0356 kpr:KPR_2708 kpr:KPR_4618 kpr:KPR_4827 kpr:KPR_1501 kpr:KPR_0601 kpr:KPR_4132 kpr:KPR_0461 kpr:KPR_1550 kpr:KPR_0928 kpr:KPR_0153 kpr:KPR_0153 kpr:KPR_2018 kpr:KPR_3102	NA
