# Supplementary material for: Coexistence of Microbial Species in Structured Communities by Forming a Hawk-Dove Game Like Interactive Relationship
Source: Front Microbiol. 2019 Apr 16;10:807. doi: 10.3389/fmicb.2019.00807 (PMC6477097; doi:10.3389/fmicb.2019.00807)
Supplement: Supplementary file 5 [file Table_5.XLSX]

## Sheet: PAoutvsPA.DEG_up
Supplementary Dataset 5. Significantly differentially expressed genes of P. aeruginosa cultured in the outer well compared to normal pure culture.
Gene_id	readcount_PAout	readcount_PA	log2.Fold_change.	pvalue	qvalue	Genename	Description
PA0049	116.252	44.8309	1.3747	1.4692e-09	2.6729e-08	-	hypothetical protein
PA0082	127.805	50.4683	1.3405	4.7068e-10	9.2278e-09	-	hypothetical protein
PA0164	115.53	55.5688	1.0559	6.6098e-07	8.5481e-06	-	gamma-glutamyltranspeptidase
PA0409	143.691	60.1324	1.2568	2.8804e-10	5.7521e-09	pilH	twitching motility protein PilH
PA0422	79.6676	35.7036	1.1579	9.7795e-06	0.00010045	-	hypothetical protein
PA0462	243.817	105.232	1.2122	1.2365e-15	3.8472e-14	-	hypothetical protein
PA0534	239.966	51.8105	2.2115	2.2002e-32	1.5486e-30	-	hypothetical protein
PA0535	48.6189	19.8652	1.2913	0.00018406	0.0014635	-	transcriptional regulator
PA0537	152.115	73.5548	1.0483	1.3886e-08	2.2246e-07	-	hypothetical protein
PA0546	593.536	272.744	1.1218	4.2731e-32	2.9592e-30	metK	S-adenosylmethionine synthetase
PA0547	542.269	167.243	1.6971	1.7144e-51	2.5383e-49	-	transcriptional regulator
PA0654	170.888	75.9709	1.1695	6.8304e-11	1.4236e-09	speD	S-adenosylmethionine decarboxylase
PA0713	624.585	252.073	1.3091	9.13e-42	9.8e-40	-	hypothetical protein
PA0714	612.55	265.764	1.2047	1.531e-36	1.2641e-34	phrD	PhrD
PA0737	107.587	52.3474	1.0393	2.1181e-06	2.4984e-05	-	hypothetical protein
PA0762	1535.83	673.268	1.1898	2.1685e-87	1.1638e-84	algU	RNA polymerase sigma factor AlgU
PA0843	32.9742	10.4695	1.6551	0.00025157	0.0019219	plcR	phospholipase C accessory protein PlcR
PA1082	408.447	76.5078	2.4165	2.0666e-59	3.8578e-57	flgG	flagellar basal body rod protein FlgG
PA1083	77.2608	29.7978	1.3745	8.2317e-07	1.055e-05	flgH	flagellar basal body L-ring protein
PA1098	505.204	144.694	1.8039	6.0524e-52	9.2808e-50	fleS	two-component sensor
PA1100	223.84	45.6362	2.2942	1.4709e-31	9.8677e-30	fliE	flagellar hook-basal body complex protein FliE
PA1101	441.421	124.828	1.8222	3.4761e-46	4.0337e-44	fliF	flagellar MS-ring protein
PA1114	58.4871	28.1871	1.0531	0.00041431	0.0029897	-	hypothetical protein
PA1168	82.0745	39.1935	1.0663	2.4223e-05	0.00023117	-	hypothetical protein
PA1170	178.59	87.2457	1.0335	1.174e-09	2.1633e-08	-	hypothetical protein
PA1200	53.4327	22.5497	1.2446	0.00013465	0.0010929	-	hypothetical protein
PA1282	248.39	82.4136	1.5917	1.2869e-22	5.9412e-21	-	major facilitator superfamily transporter
PA1296	177.146	77.85	1.1862	1.9199e-11	4.2605e-10	-	2-hydroxyacid dehydrogenase
PA1442	202.418	36.509	2.471	5.0425e-31	3.2314e-29	-	flagellar basal body protein FliL
PA1452	663.576	159.19	2.0595	1.4602e-79	6.2695e-77	flhA	flagellar biosynthesis protein FlhA
PA1453	563.931	192.209	1.5528	1.1835e-47	1.5399e-45	flhF	flagellar biosynthesis regulator FlhF
PA1462	237.559	82.9505	1.518	1.9381e-20	8.0788e-19	-	plasmid partitioning protein
PA1471	210.12	97.7152	1.1046	4.0531e-12	9.5615e-11	-	hypothetical protein
PA1596	444.31	214.49	1.0507	2.5749e-22	1.1637e-20	htpG	chaperone protein HtpG
PA1650	139.599	67.9174	1.0394	6.594e-08	9.5648e-07	-	transporter
PA1651	142.728	59.864	1.2535	3.5605e-10	7.0125e-09	-	transporter
PA1776	782.957	389.25	1.0082	6.9317e-36	5.4112e-34	sigX	RNA polymerase sigma factor SigX
PA1831	325.891	129.124	1.3356	3.3758e-23	1.6105e-21	-	hypothetical protein
PA1970	86.4069	39.1935	1.1405	5.2609e-06	5.6329e-05	-	hypothetical protein
PA1999	1128.1	444.014	1.3452	7.1163e-77	2.7777e-74	dhcA	dehydrocarnitine CoA transferase subunit A
PA2009	291.954	143.888	1.0208	1.2895e-14	3.6909e-13	hmgA	homogentisate 1%2C2-dioxygenase
PA2016	96.9972	37.0459	1.3886	2.6404e-08	4.0345e-07	liuR	liu genes regulator
PA2026	291.954	47.2469	2.6275	8.0045e-47	9.8194e-45	-	hypothetical protein
PA2067	58.4871	23.6235	1.3079	3.4751e-05	0.00032295	-	hydrolase
PA2114	193.994	72.2126	1.4257	1.0937e-15	3.4278e-14	-	major facilitator superfamily transporter
PA2116	41.8797	15.8385	1.4028	0.0002313	0.001783	-	hypothetical protein
PA2306	90.7393	43.2202	1.07	8.5585e-06	8.8332e-05	ambA	protein AmbA
PA2365	117.696	32.7507	1.8455	1.1116e-13	2.9101e-12	-	hypothetical protein
PA2384	105.903	27.3817	1.9515	2.9203e-13	7.508e-12	-	hypothetical protein
PA2386	601.96	255.294	1.2375	2.6283e-37	2.3509e-35	pvdA	L-ornithine N5-oxygenase
PA2389	111.679	51.8105	1.108	4.0245e-07	5.3497e-06	pvdR	pyoverdine biosynthesis protein PvdR
PA2393	166.075	80.5345	1.0442	3.3791e-09	5.8977e-08	-	dipeptidase
PA2395	74.1318	35.9721	1.0432	7.9094e-05	0.0006738	pvdO	pyoverdine biosynthesis protein PvdO
PA2397	161.261	75.7024	1.091	1.7447e-09	3.1212e-08	pvdE	pyoverdine biosynthesis protein PvdE
PA2411	241.41	120.533	1.0021	4.8214e-12	1.119e-10	-	thioesterase
PA2445	635.656	295.025	1.1074	1.2291e-33	9.0986e-32	gcvP2	glycine dehydrogenase
PA2446	94.831	41.0726	1.2072	6.5489e-07	8.4949e-06	gcvH2	glycine cleavage system protein H
PA2448	259.461	67.3805	1.9451	4.1578e-30	2.5872e-28	-	hypothetical protein
PA2512	652.504	243.483	1.4222	8.9765e-49	1.2044e-46	antA	anthranilate dioxygenase large subunit
PA2513	99.6447	28.724	1.7945	1.9251e-11	4.2605e-10	antB	anthranilate dioxygenase small subunit
PA2514	227.209	58.7902	1.9504	1.1795e-26	6.6635e-25	antC	anthranilate dioxygenase reductase
PA2577	33.4556	11.2748	1.5691	0.00037534	0.0027454	-	transcriptional regulator
PA2592	534.086	242.946	1.1364	1.406e-29	8.6237e-28	-	spermidine/putrescine-binding protein
PA2819	660.447	190.061	1.797	4.9751e-67	1.1867e-64	-	hypothetical protein
PA2830	440.459	211.806	1.0563	2.6658e-22	1.1923e-20	htpX	protease HtpX
PA2860	93.1462	43.4886	1.0989	4.2318e-06	4.6829e-05	-	hypothetical protein
PA2955	103.014	23.6235	2.1246	3.4259e-14	9.49e-13	-	hypothetical protein
PA3026	380.527	152.479	1.3194	2.2279e-26	1.2108e-24	-	hypothetical protein
PA3069	110.235	49.9314	1.1426	2.5958e-07	3.5381e-06	-	hypothetical protein
PA3126	264.516	96.1045	1.4607	1.7266e-21	7.4883e-20	ibpA	heat-shock protein IbpA
PA3133	310.487	134.224	1.2099	1.949e-19	7.834e-18	-	transcriptional regulator
PA3160	1339.91	628.169	1.0929	1.1199e-67	2.8285e-65	wzz	O-antigen chain length regulator
PA3177	165.352	53.4212	1.6301	4.8896e-16	1.6026e-14	-	hypothetical protein
PA3216	348.516	109.258	1.6735	4.0171e-33	2.9234e-31	-	hypothetical protein
PA3333	63.7823	25.5026	1.3225	1.3139e-05	0.00013181	fabH2	3-oxoacyl-ACP synthase III
PA3342	172.092	72.4811	1.2475	6.7269e-12	1.5528e-10	-	hypothetical protein
PA3350	272.459	60.6693	2.167	1.0187e-35	7.8103e-34	-	flagellar basal body P-ring biosynthesis protein FlgA
PA3464	146.097	69.7966	1.0657	1.7966e-08	2.8051e-07	-	hypothetical protein
PA3496	74.3725	26.8448	1.4701	3.9666e-07	5.2891e-06	-	hypothetical protein
PA3645	197.364	93.6885	1.0749	4.4998e-11	9.4706e-10	fabZ	3-hydroxyacyl-[acyl-carrier-protein] dehydratase FabZ
PA3740	245.983	92.8831	1.4051	4.0932e-19	1.6123e-17	-	hypothetical protein
PA3762	87.129	39.9988	1.1232	6.1388e-06	6.4601e-05	-	hypothetical protein
PA3904	56.5616	26.3079	1.1043	0.00032128	0.0023907	-	hypothetical protein
PA4139	154.762	45.0993	1.7789	9.0214e-17	3.0741e-15	-	hypothetical protein
PA4141	1225.58	490.992	1.3197	3.6879e-81	1.7594e-78	-	hypothetical protein
PA4154	93.8682	44.294	1.0835	4.8916e-06	5.3305e-05	-	hypothetical protein
PA4206	158.132	73.018	1.1148	1.3804e-09	2.522e-08	mexH	resistance-nodulation-cell division (RND) efflux membrane fusion protein
PA4306	86.8883	31.14	1.4804	3.6459e-08	5.4734e-07	flp	type IVb pilin Flp
PA4310	183.404	91.5409	1.0025	1.6847e-09	3.0392e-08	pctB	chemotactic transducer PctB
PA4326	143.45	58.7902	1.2869	1.4685e-10	2.9741e-09	-	hypothetical protein
PA4386	175.943	84.0243	1.0662	6.3591e-10	1.2299e-08	groES	co-chaperonin GroES
PA4519	374.751	153.552	1.2872	3.741e-25	1.9352e-23	speC	ornithine decarboxylase
PA4662	49.1003	22.5497	1.1226	0.0006914	0.004788	murI	glutamate racemase
PA4703	78.4642	36.7774	1.0932	2.6056e-05	0.00024642	-	hypothetical protein
PA4781	166.797	71.1388	1.2294	2.3022e-11	5.069e-10	-	cyclic di-GMP phosphodiesterase
PA4840	102.533	39.4619	1.3776	1.2853e-08	2.0853e-07	-	translation initiation factor Sui1
PA4925	90.2579	45.0993	1.0009	2.4228e-05	0.00023117	-	hypothetical protein
PA4995	137.673	52.3474	1.3951	2.9268e-11	6.3467e-10	-	acyl-CoA dehydrogenase
PA5030	104.218	46.9785	1.1495	4.8888e-07	6.4191e-06	-	major facilitator superfamily transporter
PA5039	105.903	40.5357	1.3855	6.4667e-09	1.0846e-07	aroK	shikimate kinase
PA5053	146.579	45.9047	1.675	7.2629e-15	2.1213e-13	hslV	ATP-dependent protease peptidase subunit
PA5058	133.1	58.7902	1.1789	6.9709e-09	1.1601e-07	phaC2	poly(3-hydroxyalkanoic acid) synthase
PA5171	748.298	357.305	1.0665	3.0306e-37	2.6555e-35	arcA	arginine deiminase
PA5285	348.034	148.72	1.2266	5.3168e-22	2.3534e-20	-	hypothetical protein
PA5360	106.143	44.294	1.2608	5.5814e-08	8.2069e-07	phoB	two-component response regulator PhoB
PA5379	179.072	66.8436	1.4217	1.5167e-14	4.2843e-13	sdaB	L-serine dehydratase
PA5398	703.771	329.923	1.093	2.2356e-36	1.8111e-34	dgcA	dimethylglycine catabolism protein DgcA
PA5399	289.066	113.285	1.3514	4.4188e-21	1.86e-19	dgcB	dimethylglycine catabolism protein DgcB
PA5400	128.768	62.28	1.0479	1.7904e-07	2.4797e-06	-	electron transfer flavoprotein subunit alpha
PA5411	145.135	68.7228	1.0785	1.4933e-08	2.3659e-07	gbcB	protein GbcB
PA5416	236.837	74.0917	1.6765	4.3564e-23	2.0554e-21	soxB	sarcosine oxidase subunit beta
PA5418	508.573	166.975	1.6068	4.09e-45	4.5027e-43	soxA	sarcosine oxidase subunit alpha
PA5419	77.7421	30.8716	1.3324	1.3191e-06	1.6561e-05	soxG	sarcosine oxidase subunit gamma
PA5420	152.837	47.5154	1.6855	1.494e-15	4.582e-14	purU2	formyltetrahydrofolate deformylase
PA5421	952.883	370.727	1.3619	2.44e-66	5.5139e-64	fdhA	glutathione-independent formaldehyde dehydrogenase
PA5436	990.189	389.787	1.345	1.1028e-67	2.8285e-65	-	acetyl-CoA carboxylase subunit alpha
PA5526	419.278	133.687	1.649	9.1049e-39	8.8847e-37	-	hypothetical protein
PA5527	180.275	79.1923	1.1868	1.2569e-11	2.8402e-10	-	hypothetical protein

## Sheet: KEGG_up
Term	Sample number	Background number	P-value	Corrected P-value	UniGenes	KO	Entrez ID
Flagellar assembly	6	35	0.000157065	0.00549727	PA1101 PA1100 PA3350 PA1082 PA1083 PA1452	pae:PA1101 pae:PA1100 pae:PA3350 pae:PA1082 pae:PA1083 pae:PA1452	881927 882031 882517 880935 879458 881867
Glycine, serine and threonine metabolism	6	49	0.000804134	0.0140723	PA2445 PA2446 PA5379 PA5419 PA5418 PA5416	pae:PA2445 pae:PA2446 pae:PA5379 pae:PA5419 pae:PA5418 pae:PA5416	882927 882928 878445 880825 880824 880060
Aminobenzoate degradation	3	17	0.00731467	0.0853378	PA2514 PA2513 PA2512	pae:PA2514 pae:PA2513 pae:PA2512	882979 882978 882892
Cysteine and methionine metabolism	3	40	0.0566082	0.495322	PA0546 PA0654 PA5379	pae:PA0546 pae:PA0654 pae:PA5379	878379 878446 878445

## Sheet: PAoutvsPA.DEG_down
Supplementary Dataset 5. Significantly differentially expressed genes of P. aeruginosa cultured in the outer well compared to normal pure culture.
Gene_id	readcount_PAout	readcount_PA	log2.Fold_change.	pvalue	qvalue	Genename	Description
PA0009	87.851	209.39	-1.2531	1.9021e-11	4.2536e-10	glyQ	glycine--tRNA ligase subunit alpha
PA0106	49.341	136.64	-1.4695	6.2131e-10	1.2071e-08	coxA	cytochrome C oxidase subunit I
PA0107	12.5158	43.7571	-1.8058	4.1456e-05	0.00037791	-	cytochrome C oxidase assembly protein
PA0108	49.341	102.816	-1.0592	4.8496e-05	0.00043743	coIII	cytochrome C oxidase subunit III
PA0140	482.82	1156.21	-1.2598	1.3494e-56	2.414e-54	ahpF	alkyl hydroperoxide reductase
PA0299	318.189	676.49	-1.0882	1.3011e-26	7.2547e-25	spuC	aminotransferase
PA0565	46.9341	120.265	-1.3575	5.3215e-08	7.8787e-07	-	hypothetical protein
PA0622	47.8969	130.197	-1.4427	2.7043e-09	4.798e-08	-	bacteriophage protein
PA0754	18.0516	46.4416	-1.3633	0.00069272	0.0047894	-	hypothetical protein
PA0796	182.682	380.66	-1.0592	5.3719e-15	1.5907e-13	prpB	2-methylisocitrate lyase
PA0848	74.1318	207.511	-1.485	1.5149e-14	4.2843e-13	-	alkyl hydroperoxide reductase
PA0887	263.553	908.161	-1.7849	1.4194e-76	5.0786e-74	acsA	acetyl-CoA synthetase
PA1112	514.109	1137.42	-1.1456	1.4302e-47	1.8061e-45	-	hypothetical protein
PA1544	703.29	1615.79	-1.2	2.7509e-72	9.0855e-70	anr	transcriptional regulator Anr
PA1979	12.9971	38.6566	-1.5725	0.00051957	0.0036784	eraS	sensor kinase EraS
PA1982	34.1777	132.077	-1.9502	5.2154e-14	1.4263e-12	exaA	quinoprotein ethanol dehydrogenase
PA1983	24.0688	72.2126	-1.5851	1.8166e-06	2.1726e-05	exaB	cytochrome C550
PA2031	30.808	68.7228	-1.1575	0.00032784	0.0024269	-	hypothetical protein
PA3038	118.418	412.605	-1.8009	3.3381e-36	2.6541e-34	-	porin
PA3234	126.602	451.262	-1.8337	1.9334e-40	1.9906e-38	-	acetate permease
PA3235	30.808	168.317	-2.4498	5.61e-23	2.6181e-21	-	hypothetical protein
PA3287	64.9857	142.278	-1.1305	4.1178e-07	5.4567e-06	-	hypothetical protein
PA3341	130.212	307.105	-1.2379	8.51e-16	2.7472e-14	-	transcriptional regulator
PA3529	1082.37	2720.46	-1.3297	6.269e-143	5.3833e-140	-	peroxidase
PA3568	119.14	239.456	-1.0071	3.1281e-09	5.5044e-08	-	propionyl-CoA synthetase
PA3584	207.473	572.869	-1.4653	1.3297e-36	1.1194e-34	glpD	glycerol-3-phosphate dehydrogenase
PA4023	95.553	286.434	-1.5838	2.0913e-21	8.9791e-20	-	transporter
PA4290	88.5731	237.308	-1.4218	2.0686e-15	6.2547e-14	-	chemotaxis transducer
PA5481	39.7135	87.2457	-1.1355	6.8867e-05	0.00059614	-	hypothetical protein

## Sheet: KEGG_down
Term	Sample number	Background number	P-value	Corrected P-value	UniGenes	KO	Entrez ID
Propanoate metabolism	3	47	0.00419219	0.0509381	PA0887 PA0796 PA3568	pae:PA0887 pae:PA0796 pae:PA3568	879732 882026 878696
Oxidative phosphorylation	3	55	0.00636726	0.0509381	PA0106 PA0107 PA0108	pae:PA0106 pae:PA0107 pae:PA0108	881877 882009 882001
Glycolysis / Gluconeogenesis	2	37	0.0270565	0.144301	PA0887 PA1982	pae:PA0887 pae:PA1982	879732 880475
Chloroalkane and chloroalkene degradation	1	8	0.0581182	0.232473	PA1982	pae:PA1982	880475
